# Supplementary material for: MDM2 inhibition in combination with endocrine therapy and CDK4/6 inhibition for the treatment of ER-positive breast cancer
Source: PubMed Central journal article supplement (PMC7425060; doi:10.1186/s13058-020-01318-2), 2020-08-12

Figure S1

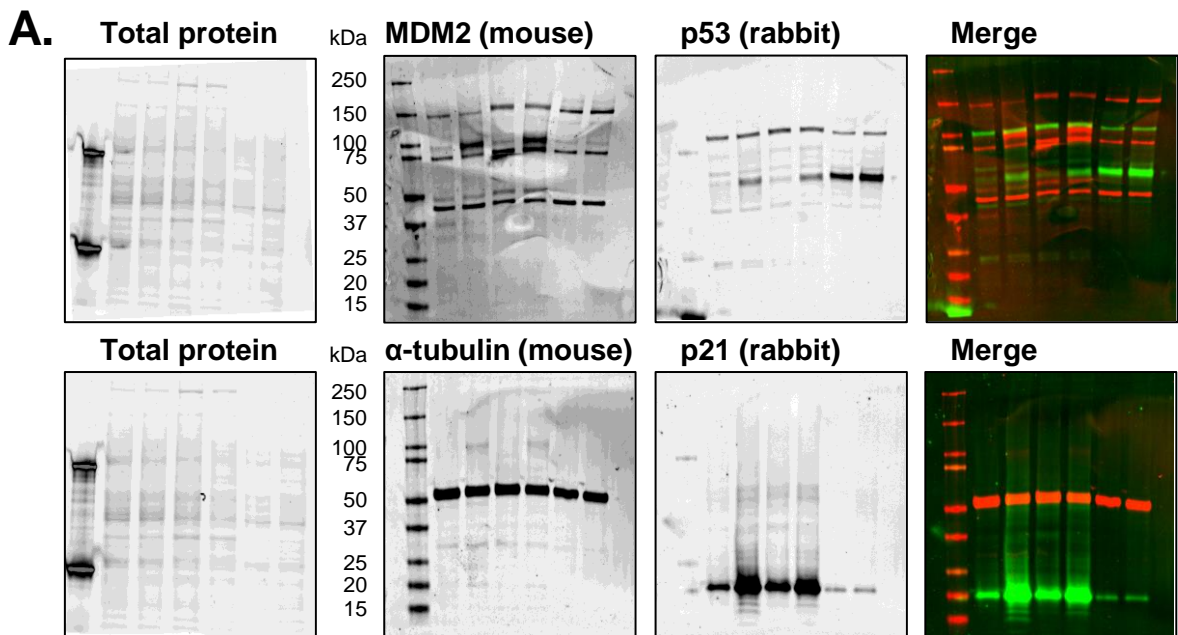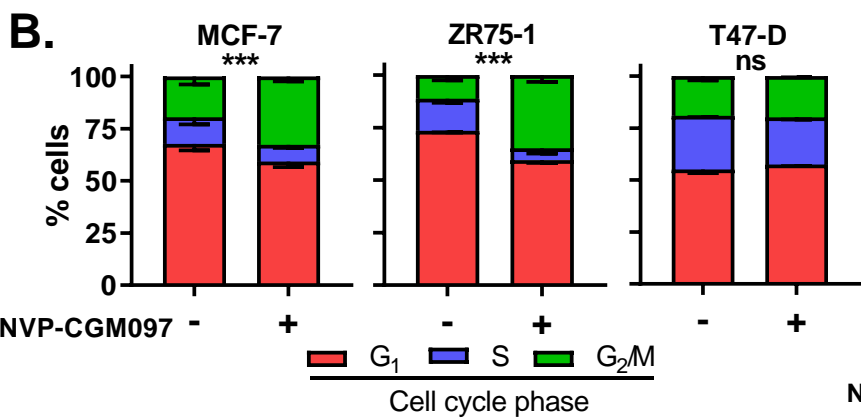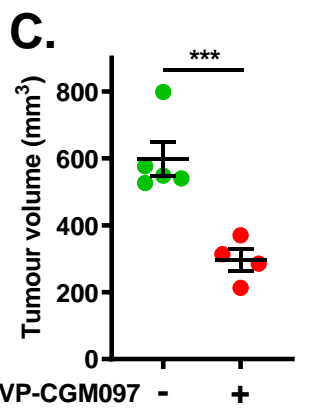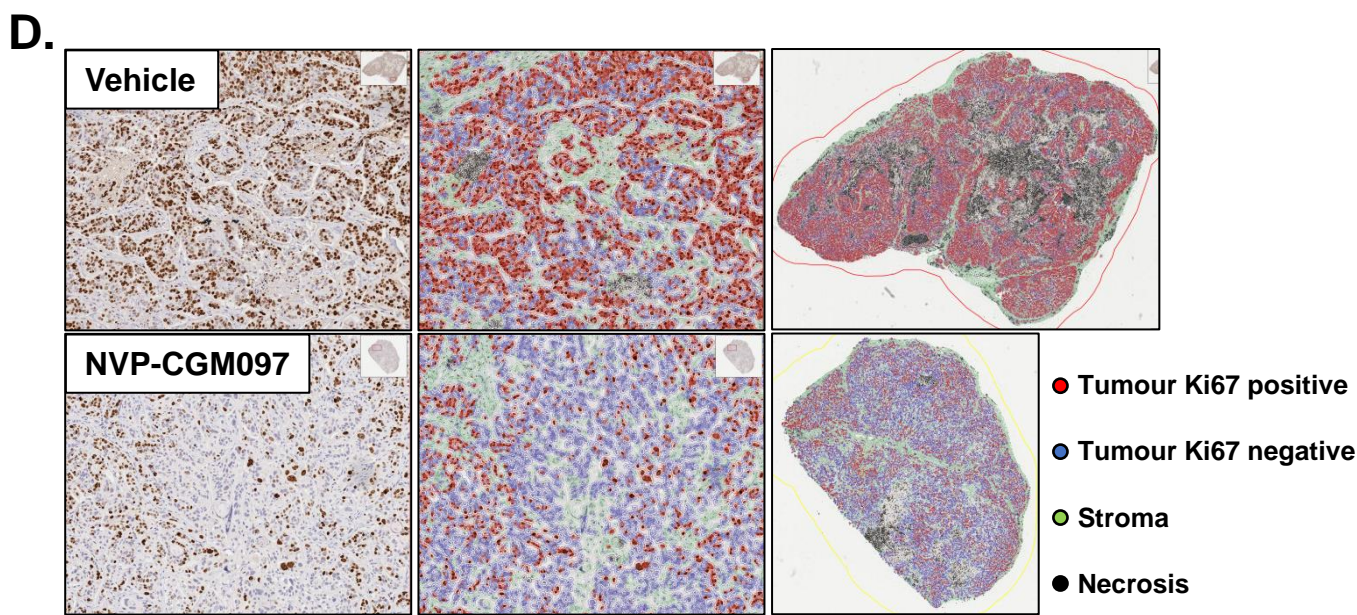

Figure S2

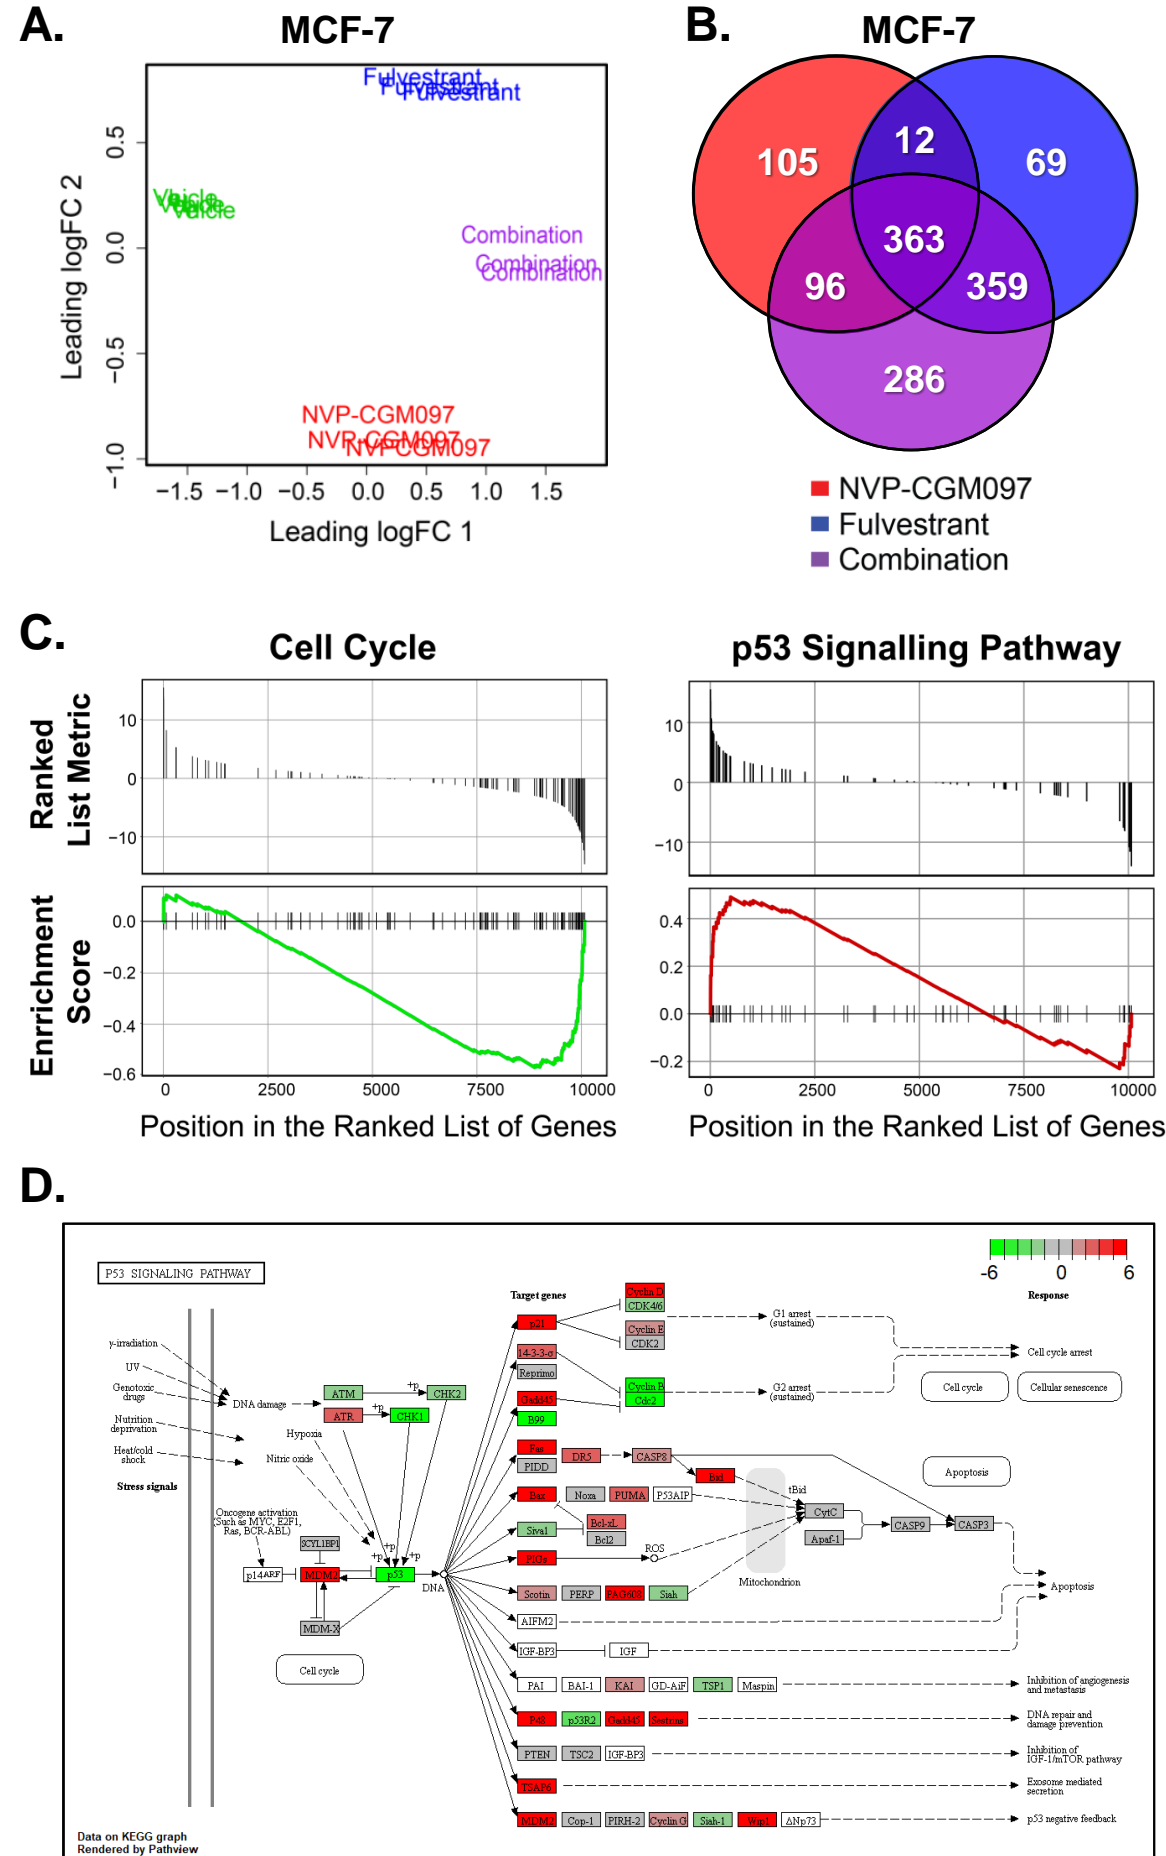

Figure S3

A.

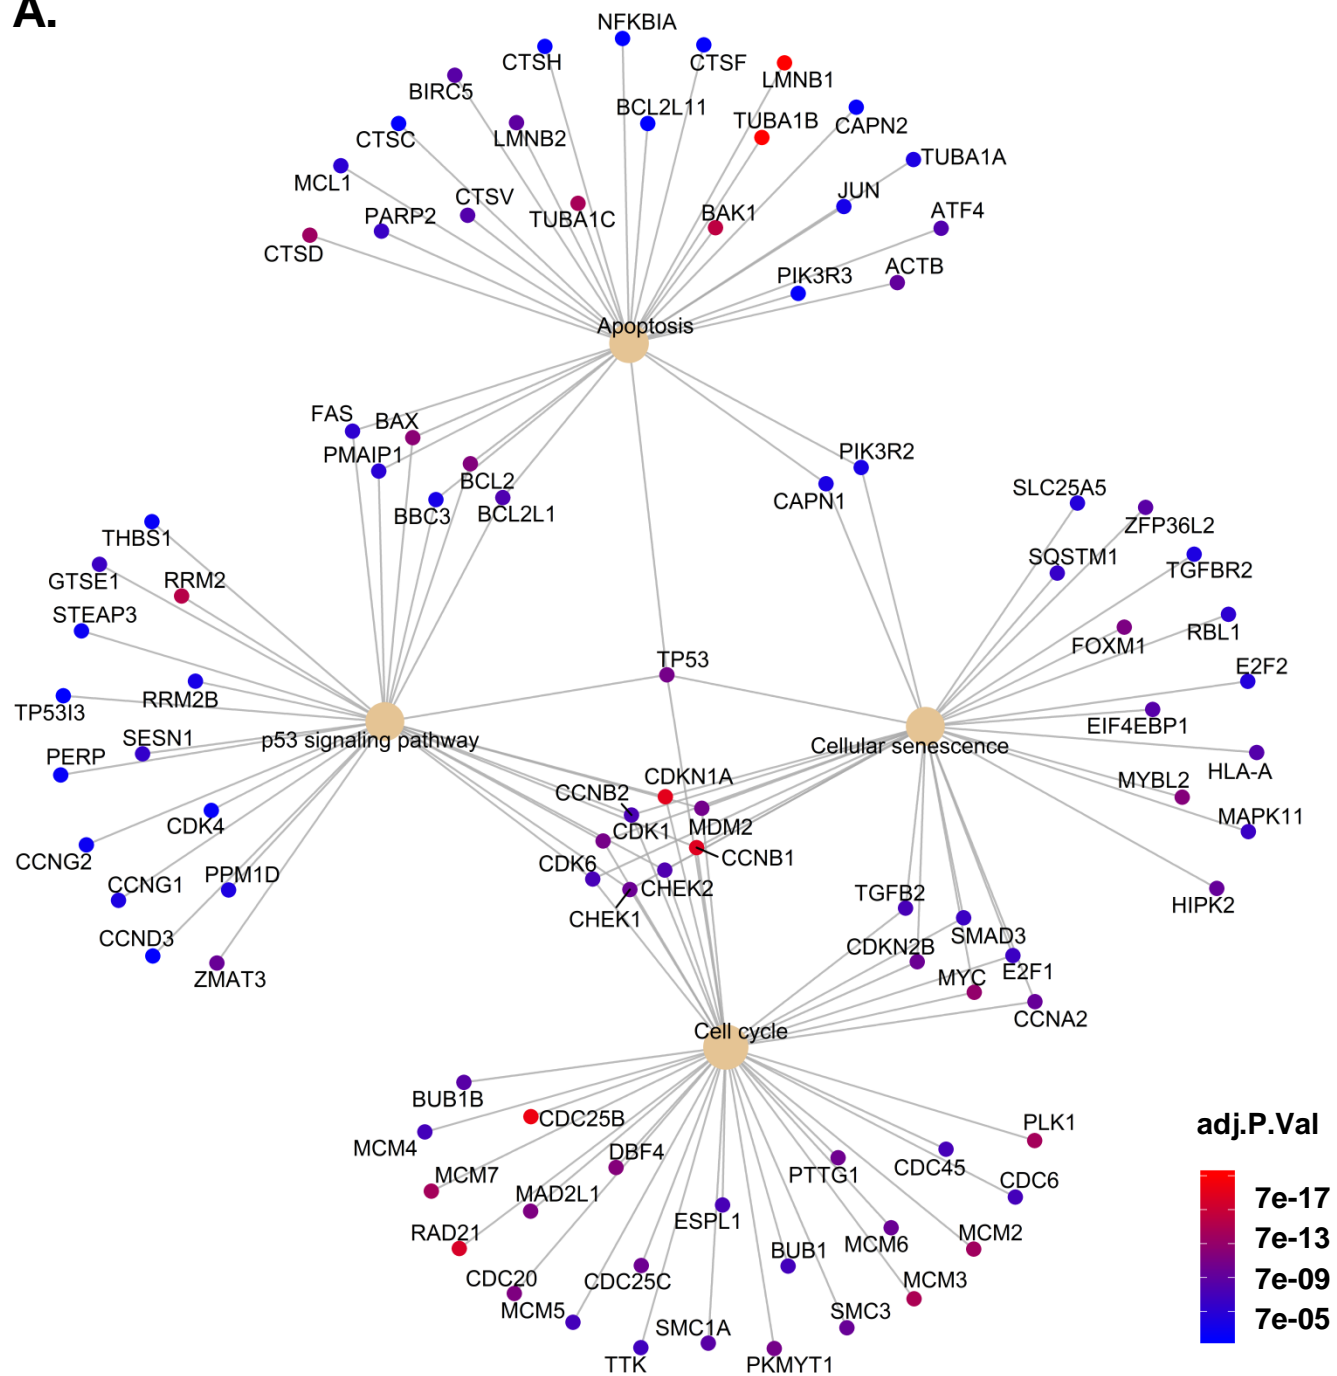

Figure S4

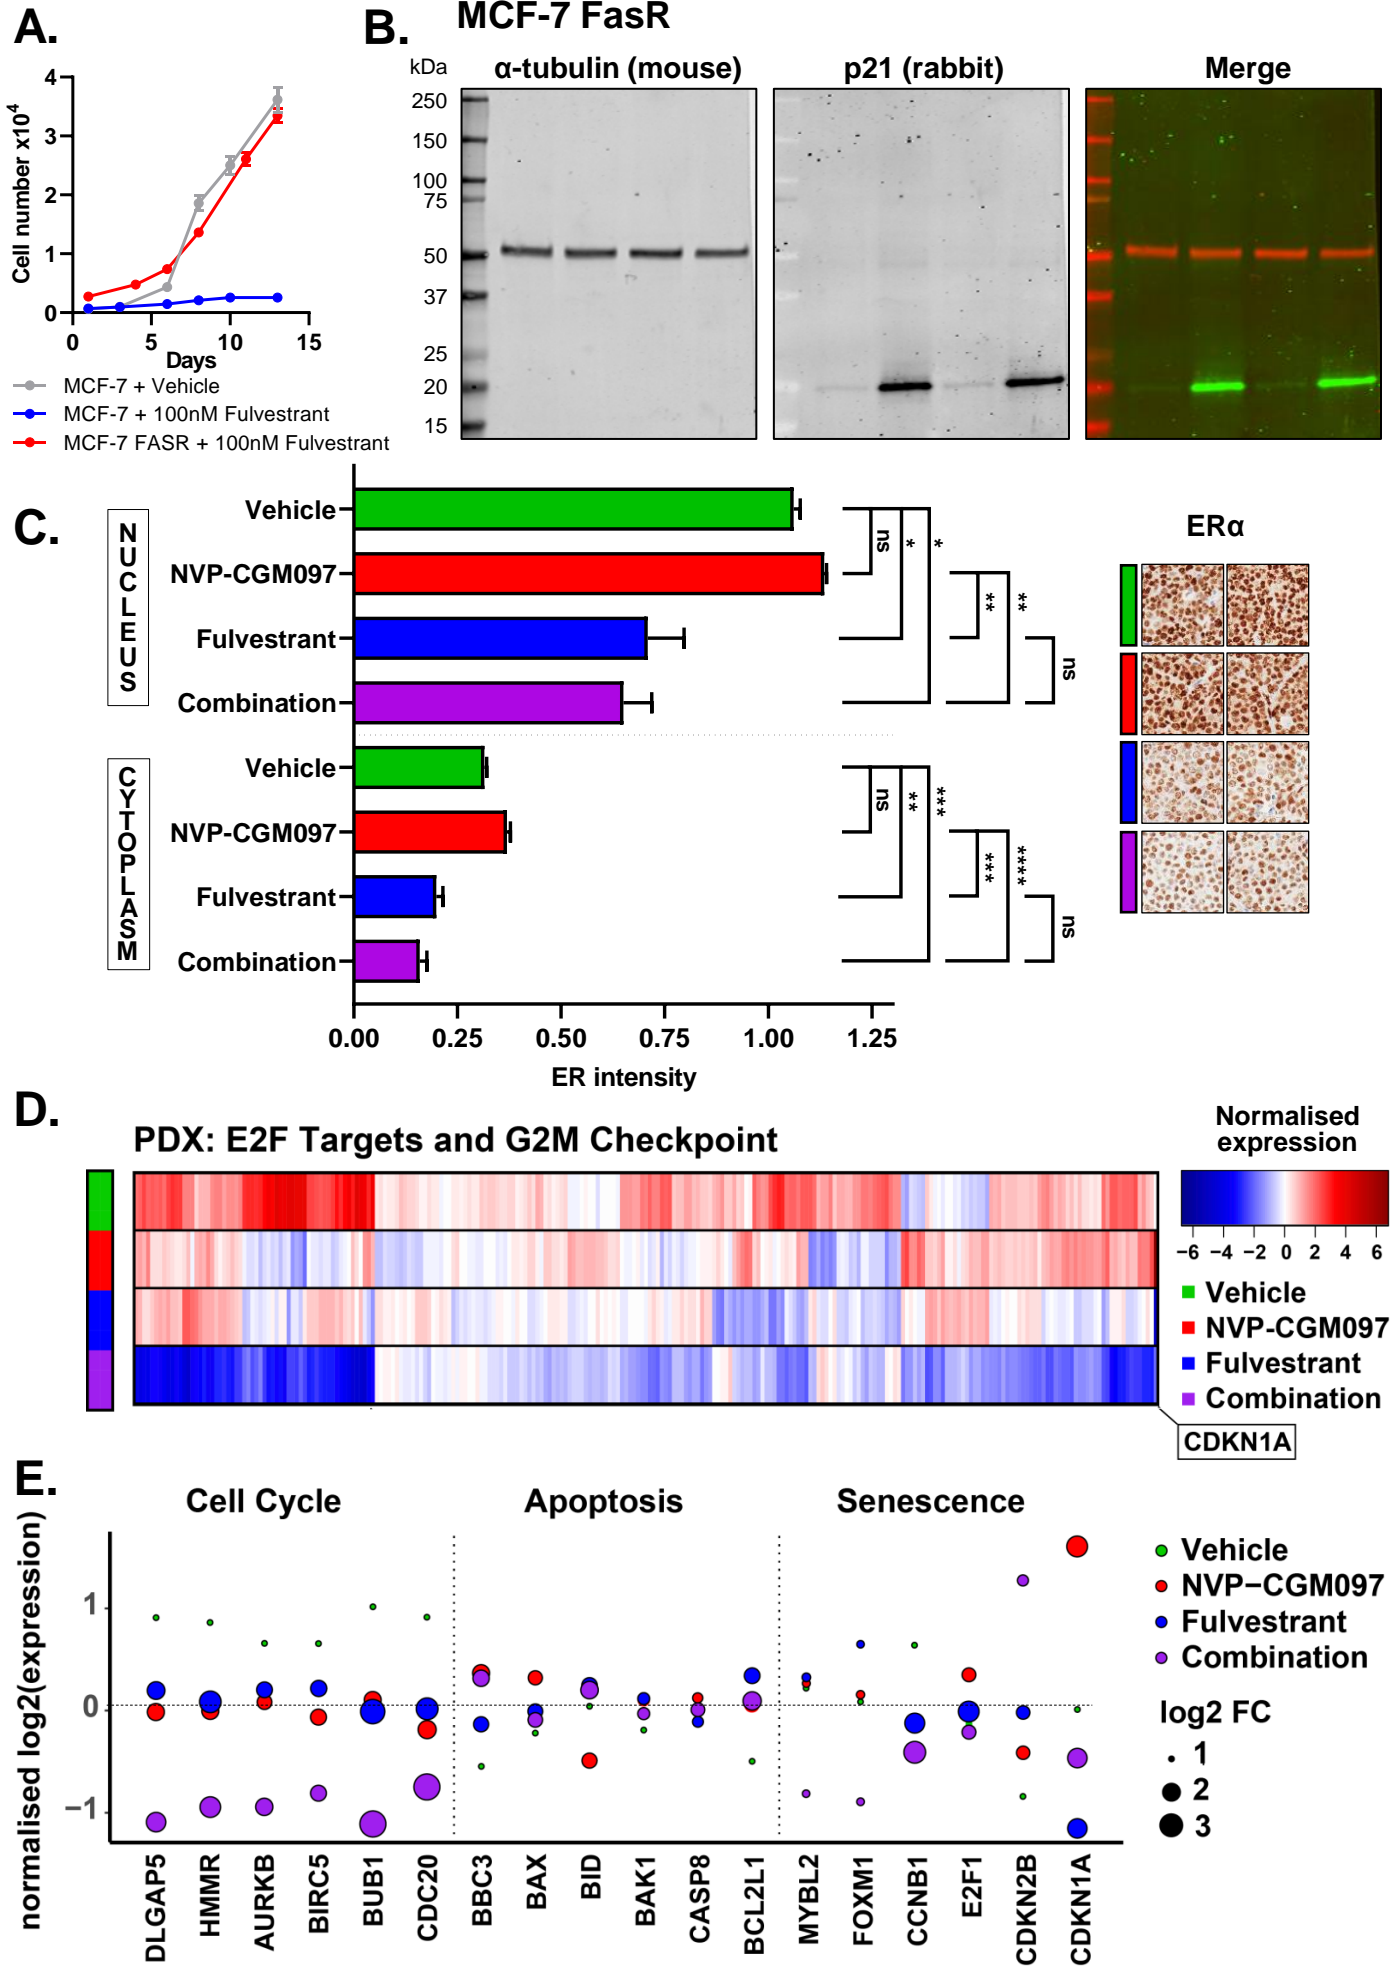

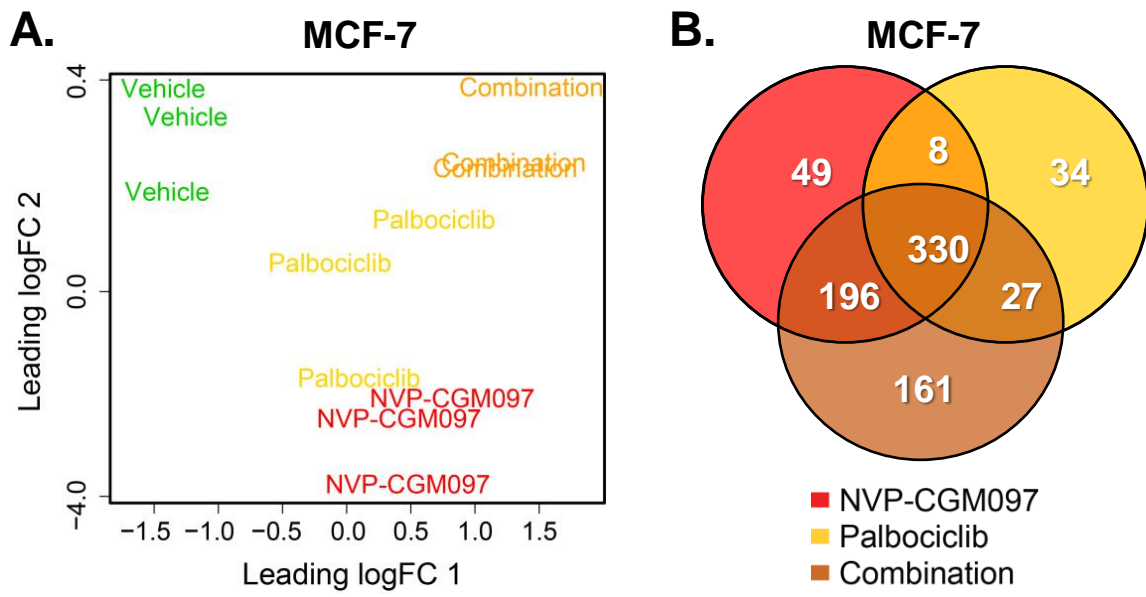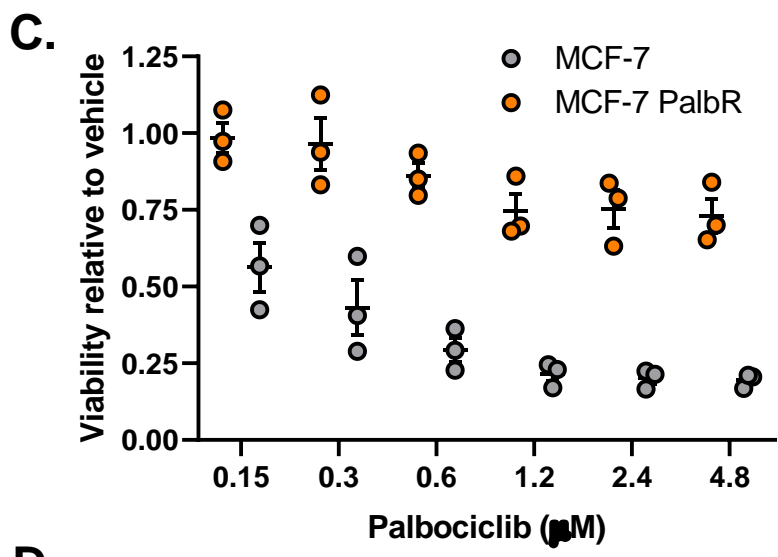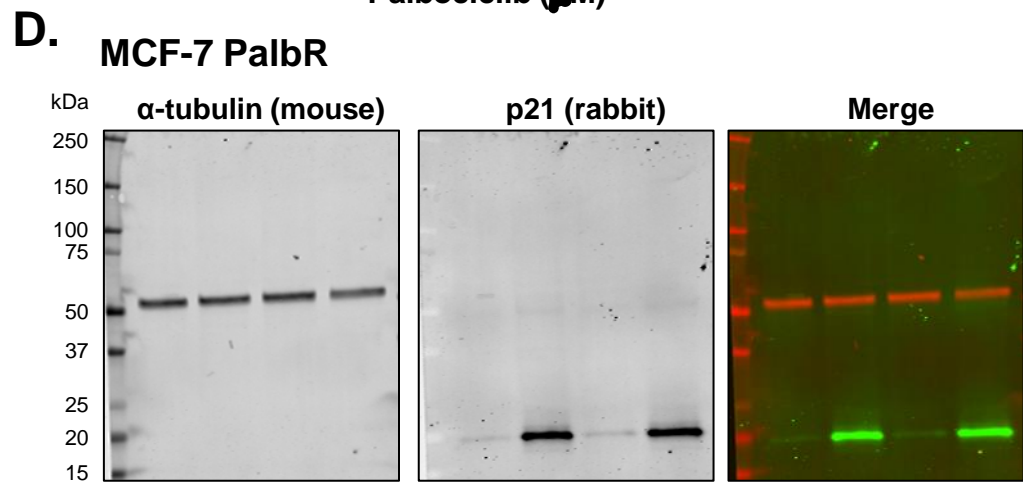

Supplement: 13058_2020_1318_MOESM2_ESM.pdf [file 13058_2020_1318_MOESM2_ESM.pdf]
