# Supplementary material for: MDM2 inhibition in combination with endocrine therapy and CDK4/6 inhibition for the treatment of ER-positive breast cancer
Source: Breast Cancer Res. 2020 Aug 12;22:87. doi: 10.1186/s13058-020-01318-2 (PMC7425060; doi:10.1186/s13058-020-01318-2)
Supplement: Supplementary file 1 — Additional file 1: Table S1. Differential expression analysis of MCF7 cell lines following 48 hours treatment with NVP-CGM097 versus vehicle (0.01% DMSO). Table S2: Differential expression analysis of MCF7 cell lines following 48 hours treatment with Fulvestrant versus vehicle (0.01% DMSO). Table S3. Differential expression analysis of MCF7 cell lines following 48 hours treatment with combination therapy (NVP-CGM097 + fulvestrant) versus vehicle (0.01% DMSO). Table S4. Differential genes induced by combination therapy (NVP-CGM097 + fulvestrant) versus vehicle (0.01% DMSO). Table S5. KEGG PATHWAY enrichment analysis of differentially expressed genes following treatment with combination of NVP-CGM097 and fulvestrant versus vehicle (0.01% DMSO). Table S6. Combination effect quantified for all genes following treatment with NVP-CGM097, fulvestrant and combination across cell lines. Table S7. Differential expression analysis of the PDX breast cancer model treated with NVP-CGM097 versus vehicle. Table S8. Differential expression analysis of the PDX breast cancer model treated with fulvestrant versus vehicle. Table S9. Differential expression analysis of the PDX breast cancer model treated with combination therapy versus vehicle. Table S10. Gene set enrichment analysis of DE genes induced by NVP-CGM097 in MCF-7 cell lines. Table S11. Gene set enrichment analysis of DE genes induced by fulvestrant in MCF-7 cell lines. Table S12. Gene set enrichment analysis of DE genes induced by combination therapy in MCF-7 cell lines. Table S13. Gene set enrichment analysis of DE genes induced by NVP-CGM097 in the PDX treated model. Table S14. Gene set enrichment analysis of DE genes induced by fulvestrant in the PDX treated model. Table S15. Gene set enrichment analysis of DE genes induced by combination therapy in the PDX treated model. Table S16. Combination effect quantified for all genes following treatment with NVP-CGM097, fulvestrant and combination in the PDX model. Table S17. Dif [file 13058_2020_1318_MOESM1_ESM.xlsx]

## Sheet: Table S1. NVP-CGM097
Table S1: Differential expression analysis of MCF7 cell lines following 48 hours treatment with NVP-CGM097 versus vehicle (0.01% DMSO).
ENTREZID	SYMBOL	MAP	logFC	AveExpr	t	P.Value	adj.P.Val	B
440	ASNS	7q21.3	-3.82	6.02262	-28.9687	1.48057e-19	8.05796e-16	34.187
26227	PHGDH	1p12	-3.767	7.02817	-28.8721	1.59532e-19	8.05796e-16	34.4196
10797	MTHFD2	2p13.1	-2.4531	7.64089	-25.9457	1.72238e-18	5.79983e-15	32.3523
5106	PCK2	14q11.2-q12	-2.96791	6.52918	-23.6108	1.38741e-17	3.5039e-14	30.2009
16	AARS	16q22.1	-1.77712	9.29493	-20.7927	2.25391e-16	4.55381e-13	27.6037
445	ASS1	9q34.11	-2.2362	8.53358	-20.4567	3.21479e-16	5.41264e-13	27.2501
2617	GARS	7p14.3	-1.99759	7.74103	-20.105	4.68804e-16	6.76552e-13	26.8713
8140	SLC7A5	16q24.2	-2.60289	7.60851	-19.8997	5.85924e-16	7.00218e-13	26.6523
3005	H1F0	22q13.1	-1.74994	8.48146	-19.8423	6.23833e-16	7.00218e-13	26.5904
55771	PRR11	17q22	-3.5788	5.45503	-19.489	9.21075e-16	9.3047e-13	26.091
169200	TMEM64	8q21.3	2.00272	8.74729	19.2911	1.14888e-15	1.05509e-12	25.976
6472	SHMT2	12q13.3	-1.93296	7.21237	-19.2076	1.26185e-15	1.06227e-12	25.8846
26471	NUPR1	16p11.2	-4.3291	3.96479	-18.7978	2.01077e-15	1.56252e-12	23.8812
6301	SARS	1p13.3	-1.73897	8.62014	-18.6666	2.3386e-15	1.68747e-12	25.269
6790	AURKA	20q13.2	-2.35732	5.98996	-18.08	4.64883e-15	3.13083e-12	24.5713
2934	GSN	9q33.2	1.65918	7.18573	17.9421	5.47978e-15	3.3964e-12	24.4272
8565	YARS	1p35.1	-1.69386	7.4341	-17.9069	5.71558e-15	3.3964e-12	24.3857
8614	STC2	5q35.2	1.59391	7.64537	17.7085	7.25719e-15	4.07289e-12	24.1272
6520	SLC3A2	11q12.3	-2.06627	7.90359	-17.4638	9.77413e-15	5.19675e-12	23.8457
11065	UBE2C	20q13.12	-3.21114	4.7584	-17.2687	1.24252e-14	6.27598e-12	23.5455
23657	SLC7A11	4q28.3	-5.86333	2.61555	-17.1972	1.3575e-14	6.5302e-12	20.3276
3148	HMGB2	4q34.1	-2.43436	6.73753	-17.1508	1.43809e-14	6.60346e-12	23.4702
3880	KRT19	17q21.2	1.50034	11.0937	16.7163	2.48345e-14	1.09078e-11	22.8601
22974	TPX2	20q11.21	-2.53042	6.02106	-16.4866	3.33122e-14	1.40217e-11	22.6304
56925	LXN	3q25.32	2.01658	5.69727	16.4076	3.68805e-14	1.49027e-11	22.5176
3376	IARS	9q22.31	-1.46552	8.02212	-16.2583	4.47572e-14	1.73899e-11	22.3117
11260	XPOT	12q14.2	-1.45609	8.05405	-15.7416	8.85037e-14	3.31135e-11	21.626
1026	CDKN1A	6p21.2	2.62401	8.89798	15.5396	1.16122e-13	4.15179e-11	21.3501
3015	H2AFZ	4q23	-1.64355	7.7332	-15.5204	1.19186e-13	4.15179e-11	21.3324
9055	PRC1	15q26.1	-2.27282	5.75141	-15.3357	1.53231e-13	5.15978e-11	21.1214
1054	CEBPG	19q13.11	-1.97956	5.48989	-15.2635	1.69149e-13	5.51206e-11	21.0029
4141	MARS	12q13.3	-1.73724	6.99255	-15.1094	2.09163e-13	6.60302e-11	20.7939
7153	TOP2A	17q21.2	-3.33353	5.97633	-14.8263	3.10445e-13	9.50338e-11	20.4145
6897	TARS	5p13.3	-1.30102	7.69772	-14.7159	3.62756e-13	1.0622e-10	20.2161
5347	PLK1	16p12.2	-3.0992	4.40986	-14.7057	3.68016e-13	1.0622e-10	20.1554
994	CDC25B	20p13	-1.61433	6.81518	-14.6828	3.80104e-13	1.06661e-10	20.2043
9918	NCAPD2	12p13.31	-1.60388	6.41002	-14.3998	5.69479e-13	1.55483e-10	19.8091
4193	MDM2	12q15	1.83407	8.13452	14.114	8.62052e-13	2.2917e-10	19.3316
18	ABAT	16p13.2	1.09911	8.90875	14.0738	9.14409e-13	2.36855e-10	19.2473
891	CCNB1	5q13.2	-2.51579	5.49723	-14.0206	9.8864e-13	2.48914e-10	19.2735
9361	LONP1	19p13.3	-1.58395	6.47042	-14.0059	1.01024e-12	2.48914e-10	19.2345
84722	PSRC1	1p13.3	-2.17992	4.51627	-13.8277	1.31515e-12	3.16324e-10	18.9098
25932	CLIC4	1p36.11	-1.44785	7.73782	-13.6462	1.72503e-12	4.05261e-10	18.6448
595	CCND1	11q13.3	1.15855	9.19476	13.5677	1.94154e-12	4.45759e-10	18.4713
29127	RACGAP1	12q13.12	-2.28319	5.36997	-13.3734	2.60744e-12	5.85341e-10	18.3107
10024	TROAP	12q13.12	-2.79379	3.28273	-13.329	2.79072e-12	6.05427e-10	18.0493
7351	UCP2	11q13.4	1.47321	6.99227	13.3229	2.81677e-12	6.05427e-10	18.197
6510	SLC1A5	19q13.32	-1.13097	9.50349	-13.2915	2.95587e-12	6.22088e-10	18.0352
1062	CENPE	4q24	-3.16462	3.79492	-13.2726	3.04297e-12	6.27348e-10	18.0041
8971	H1FX	3q21.3	-1.25704	7.46704	-13.2205	3.29683e-12	6.66091e-10	18.0002
11004	KIF2C	1p34.1	-3.04861	3.92274	-13.0794	4.10097e-12	8.12313e-10	17.8094
6541	SLC7A1	13q12.3	-1.67172	6.7765	-12.978	4.8026e-12	9.32998e-10	17.6433
10112	KIF20A	5q31.2	-2.78873	4.00229	-12.8479	5.88979e-12	1.1101e-09	17.4717
57761	TRIB3	20p13	-1.51773	6.67015	-12.8432	5.93401e-12	1.1101e-09	17.4524
51065	RPS27L	15q22.2	1.92912	6.8788	12.748	6.89656e-12	1.26671e-09	17.2971
7832	BTG2	1q32.1	1.67651	6.67066	12.591	8.8554e-12	1.59745e-09	17.0707
54676	GTPBP2	6p21.1	-1.60328	6.18776	-12.4898	1.04159e-11	1.84599e-09	16.9066
160428	ALDH1L2	12q23.3	-5.00627	1.90025	-12.436	1.136e-11	1.97047e-09	14.7844
23204	ARL6IP1	16p12.3	-1.13463	8.36935	-12.428	1.15084e-11	1.97047e-09	16.6947
55573	CDV3	3q22.1	-0.953621	8.9916	-12.4041	1.19613e-11	2.01388e-09	16.6115
4001	LMNB1	5q23.2	-1.718	6.28373	-12.3838	1.23606e-11	2.04699e-09	16.718
3925	STMN1	1p36.11	-1.84016	6.41217	-12.3655	1.27328e-11	2.07463e-09	16.6797
22843	PPM1E	17q22	-1.95585	4.80916	-12.316	1.37987e-11	2.21261e-09	16.6622
5885	RAD21	8q24.11	-1.20637	8.48747	-12.3026	1.41022e-11	2.22594e-09	16.4725
4751	NEK2	1q32.3	-3.17034	2.43233	-12.2695	1.48842e-11	2.31324e-09	15.9671
55143	CDCA8	1p34.3	-2.95234	3.65651	-12.2453	1.54843e-11	2.37003e-09	16.4426
7453	WARS	14q32.2	-1.28223	6.73017	-12.2266	1.59629e-11	2.40238e-09	16.436
23397	NCAPH	2q11.2	-2.93531	2.85372	-12.2187	1.61712e-11	2.40238e-09	16.3074
10209	EIF1	17q21.2	-1.0858	8.82164	-12.1818	1.71797e-11	2.5152e-09	16.2666
7112	TMPO	12q23.1	-1.38806	7.17019	-12.1445	1.82646e-11	2.63584e-09	16.2711
9493	KIF23	15q23	-2.42568	4.89957	-12.1003	1.96414e-11	2.79462e-09	16.3134
1063	CENPF	1q41	-2.84982	4.80652	-12.0526	2.12513e-11	2.98168e-09	16.2369
29899	GPSM2	1p13.3	-1.7147	5.23651	-12.0344	2.18986e-11	3.03041e-09	16.2064
2232	FDXR	17q25.1	1.53292	5.3101	12.0023	2.30938e-11	3.15261e-09	16.1571
94122	SYTL5	Xp11.4	1.52148	4.1598	11.9409	2.55719e-11	3.44437e-09	16.0346
6536	SLC6A9	1p34.1	-2.47247	3.89633	-11.9269	2.6176e-11	3.47934e-09	15.8569
302	ANXA2	15q22.2	1.35981	8.02762	11.8481	2.98553e-11	3.91685e-09	15.7631
3161	HMMR	5q34	-3.092	2.52554	-11.8386	3.03347e-11	3.92873e-09	15.5989
11031	RAB31	18p11.22	1.3684	7.05601	11.7385	3.58923e-11	4.58967e-09	15.5563
10615	SPAG5	17q11.2	-2.32545	4.27681	-11.6705	4.02575e-11	5.08352e-09	15.6048
10460	TACC3	4p16.3	-2.35365	4.29849	-11.6416	4.22751e-11	5.2148e-09	15.5578
84706	GPT2	16q11.2	-1.64588	5.96269	-11.6409	4.23296e-11	5.2148e-09	15.5137
6241	RRM2	2p25.1	-1.95047	5.58272	-11.5833	4.66788e-11	5.68131e-09	15.3713
81611	ANP32E	1q21.2	-1.25522	5.975	-11.4693	5.67045e-11	6.81939e-09	15.1955
128239	IQGAP3	1q22	-3.02472	3.47401	-11.4317	6.04811e-11	7.188e-09	15.1624
6509	SLC1A4	2p14	-1.6997	4.28032	-11.4211	6.15969e-11	7.23549e-09	15.1822
27338	UBE2S	19q13.42	-1.74299	5.07759	-11.3978	6.41186e-11	7.3027e-09	15.1407
4886	NPY1R	4q32.2	1.7692	3.89224	11.3974	6.41569e-11	7.3027e-09	15.1274
347902	AMIGO2	12q13.11	-1.71525	5.36952	-11.3958	6.43378e-11	7.3027e-09	15.116
833	CARS	11p15.4	-1.39746	6.16063	-11.3453	7.01852e-11	7.8779e-09	14.9934
2058	EPRS	1q41	-1.0599	8.00523	-11.3197	7.3362e-11	8.14399e-09	14.8108
1163	CKS1B	1q21.3	-2.22442	4.37578	-11.2911	7.70919e-11	8.46503e-09	14.9697
6917	TCEA1	8q11.23	-1.33741	6.8602	-11.2761	7.91207e-11	8.59438e-09	14.8183
81620	CDT1	16q24.3	-1.89821	4.05198	-11.1897	9.19527e-11	9.86707e-09	14.7934
24137	KIF4A	Xq13.1	-2.66826	4.16241	-11.1845	9.27907e-11	9.86707e-09	14.7872
94241	TP53INP1	8q22.1	1.69357	7.32814	11.1765	9.40865e-11	9.90064e-09	14.6578
332	BIRC5	17q25.3	-2.47424	3.56899	-11.1423	9.98799e-11	1.04019e-08	14.7124
771	CA12	15q22.2	1.03684	7.49692	11.106	1.06435e-10	1.09715e-08	14.4315
25902	MTHFD1L	6q25.1	-1.51281	5.15937	-11.0726	1.12857e-10	1.15159e-08	14.5712
9914	ATP2C2	16q24.1	-1.21551	7.17493	-11.0659	1.14203e-10	1.15368e-08	14.4553
991	CDC20	1p34.2	-2.15311	4.33721	-11.0231	1.23134e-10	1.22363e-08	14.5003
9088	PKMYT1	16p13.3	-2.61912	3.52716	-11.0212	1.2355e-10	1.22363e-08	14.4511
10403	NDC80	18p11.32	-3.19814	3.47511	-11.0035	1.27452e-10	1.24883e-08	14.4421
890	CCNA2	4q27	-2.91746	3.59897	-10.9986	1.28567e-10	1.24883e-08	14.4158
23612	PHLDA3	1q32.1	1.31742	6.66057	10.962	1.37168e-10	1.31969e-08	14.3078
5979	RET	10q11.21	1.02817	7.75193	10.9437	1.41674e-10	1.35018e-08	14.1586
11113	CIT	12q24.23	-3.39979	2.88944	-10.8996	1.53206e-10	1.44643e-08	14.0477
1854	DUT	15q21.1	-1.66777	5.29023	-10.887	1.56661e-10	1.46536e-08	14.2521
983	CDK1	10q21.2	-2.53991	4.2534	-10.8454	1.68708e-10	1.56357e-08	14.1987
4256	MGP	12p12.3	1.27337	4.63545	10.8371	1.71236e-10	1.57257e-08	14.0786
832	CAPZB	1p36.13	0.917269	8.18748	10.8195	1.76691e-10	1.60804e-08	13.9313
3619	INCENP	11q12.3	-2.17093	4.66878	-10.8071	1.8065e-10	1.6294e-08	14.1313
9824	ARHGAP11A	15q13.3	-2.33582	4.16318	-10.7774	1.90505e-10	1.70308e-08	14.0787
7468	NSD2	4p16.3	-1.12024	7.24609	-10.697	2.20073e-10	1.94684e-08	13.745
64393	ZMAT3	3q26.32	2.19631	4.9962	10.6931	2.21626e-10	1.94684e-08	13.9303
29089	UBE2T	1q32.1	-1.62334	4.2502	-10.6835	2.25465e-10	1.96349e-08	13.9094
3866	KRT15	17q21.2	3.49927	2.66052	10.6503	2.39379e-10	2.06684e-08	13.0745
51520	LARS	5q32	-0.986036	7.73446	-10.6359	2.45693e-10	2.10338e-08	13.5957
55635	DEPDC1	1p31.3	-3.5983	2.34931	-10.5991	2.62567e-10	2.22895e-08	13.3345
9928	KIF14	1q32.1	-3.03391	2.94892	-10.574	2.74789e-10	2.31327e-08	13.5951
3838	KPNA2	17q24.2	-1.16966	7.7743	-10.5531	2.85426e-10	2.38295e-08	13.4264
1894	ECT2	3q26.31	-1.55647	6.57236	-10.5463	2.88952e-10	2.39262e-08	13.5125
57103	TIGAR	12p13.32	2.37819	4.28243	10.5326	2.96262e-10	2.4332e-08	13.5967
2947	GSTM3	1p13.3	1.02136	9.08647	10.4493	3.44832e-10	2.80927e-08	13.2186
581	BAX	19q13.33	1.24777	6.01705	10.4022	3.75869e-10	3.03762e-08	13.3318
10051	SMC4	3q25.33	-1.47182	6.91191	-10.3935	3.81951e-10	3.06227e-08	13.2047
27092	CACNG4	17q24.2	0.969397	8.57014	10.3875	3.86125e-10	3.07137e-08	13.1259
92815	HIST3H2A	1q42.13	-1.9865	4.20864	-10.3782	3.92809e-10	3.10012e-08	13.3243
22822	PHLDA1	12q21.2	1.68509	4.93316	10.3666	4.01249e-10	3.14219e-08	13.3249
9232	PTTG1	5q33.3	-2.14613	3.20149	-10.3549	4.09962e-10	3.18572e-08	13.3055
79752	ZFAND1	8q21.13	-1.40262	5.55362	-10.3099	4.45399e-10	3.43467e-08	13.181
51313	FAM198B	4q32.1	2.02342	4.62061	10.2678	4.81398e-10	3.68415e-08	13.1642
468	ATF4	22q13.1	-1.02836	8.64376	-10.25	4.97538e-10	3.77904e-08	12.8417
2305	FOXM1	12p13.33	-2.22323	4.3864	-10.2244	5.21748e-10	3.93335e-08	13.082
51203	NUSAP1	15q15.1	-2.37148	4.19459	-10.1188	6.35018e-10	4.73886e-08	12.8839
79660	PPP1R3B	8p23.1	1.06886	6.10687	10.1163	6.37977e-10	4.73886e-08	12.7699
348235	SKA2	17q22	-1.09617	6.97809	-10.0701	6.95526e-10	5.12862e-08	12.5975
1983	EIF5	14q32.32	1.03347	7.74959	10.0269	7.54209e-10	5.52103e-08	12.4862
6907	TBL1X	Xp22.31-p22.2	-0.94705	7.55525	-9.95819	8.58346e-10	6.23813e-08	12.3462
5349	FXYD3	19q13.12	1.12925	6.76009	9.9543	8.64678e-10	6.23927e-08	12.4179
9787	DLGAP5	14q22.3	-3.12325	2.93322	-9.92418	9.15295e-10	6.55766e-08	12.4782
4288	MKI67	10q26.2	-2.47157	5.51062	-9.89692	9.63743e-10	6.85615e-08	12.3366
2752	GLUL	1q25.3	0.804291	9.07204	9.88149	9.92331e-10	7.01016e-08	12.125
3835	KIF22	16p11.2	-1.43256	6.2327	-9.87237	1.00965e-09	7.08301e-08	12.289
1047	CLGN	4q31.1	-5.99856	1.07744	-9.85622	1.04108e-09	7.25308e-08	10.0175
79801	SHCBP1	16q11.2	-2.63373	2.31201	-9.78527	1.19158e-09	8.22631e-08	12.1877
51187	RSL24D1	15q21.3	-0.99065	7.27795	-9.78287	1.19706e-09	8.22631e-08	12.0202
283131	NEAT1	11q13.1	1.32704	9.2993	9.76762	1.23242e-09	8.4121e-08	11.9032
58526	MID1IP1	Xp11.4	-1.38003	5.40991	-9.7555	1.26128e-09	8.55133e-08	12.1804
9709	HERPUD1	16q13	-1.11557	7.54043	-9.74629	1.28369e-09	8.6452e-08	11.9522
10276	NET1	10p15.1	-0.780052	9.2438	-9.68076	1.45546e-09	9.73712e-08	11.7335
8322	FZD4	11q14.2	-1.42194	7.05853	-9.66865	1.48973e-09	9.9008e-08	11.861
3856	KRT8	12q13.13	0.821198	13.3847	9.65683	1.52396e-09	1.00621e-07	11.5376
3014	H2AFX	11q23.3	-1.35051	6.2368	-9.62885	1.6083e-09	1.055e-07	11.7957
3693	ITGB5	3q21.2	0.971703	7.25722	9.60542	1.68265e-09	1.09666e-07	11.686
5167	ENPP1	6q23.2	-1.01952	6.80116	-9.59344	1.72201e-09	1.11142e-07	11.7114
55526	DHTKD1	10p14	-0.99609	7.24073	-9.59185	1.7273e-09	1.11142e-07	11.6527
1831	TSC22D3	Xq22.3	-0.856252	7.65596	-9.57434	1.78676e-09	1.14239e-07	11.5951
157313	CDCA2	8p21.2	-2.54865	2.74397	-9.56596	1.81598e-09	1.15377e-07	11.6664
23642	SNHG1	11q12.3	-0.969809	5.97093	-9.54257	1.90009e-09	1.19967e-07	11.645
29028	ATAD2	8q24.13	-1.40718	6.17866	-9.50401	2.04771e-09	1.28484e-07	11.5175
26528	DAZAP1	19p13.3	-0.935597	6.77906	-9.45352	2.2591e-09	1.40873e-07	11.4286
1978	EIF4EBP1	8p11.23	-1.56802	5.46932	-9.44892	2.27944e-09	1.41269e-07	11.5498
4477	MSMB	10q11.22	1.73407	2.97832	9.43852	2.32617e-09	1.43287e-07	11.6166
56937	PMEPA1	20q13.31	0.848269	8.59332	9.42817	2.37361e-09	1.45323e-07	11.276
3832	KIF11	10q23.33	-2.19868	4.66606	-9.41115	2.45387e-09	1.49331e-07	11.5316
5723	PSPH	7p11.2	-1.42704	4.39372	-9.39857	2.51497e-09	1.52133e-07	11.523
55872	PBK	8p21.1	-2.24416	2.63497	-9.35642	2.73137e-09	1.63876e-07	11.4204
79570	NKAIN1	1p35.2	1.31555	4.13912	9.35453	2.74154e-09	1.63876e-07	11.4083
3146	HMGB1	13q12.3	-0.986863	8.19921	-9.32096	2.9283e-09	1.7401e-07	11.0493
6310	ATXN1	6p22.3	-1.07408	5.77132	-9.25451	3.33786e-09	1.97187e-07	11.177
4085	MAD2L1	4q27	-1.85545	3.59342	-9.22015	3.57242e-09	2.09817e-07	11.2014
25777	SUN2	22q13.1	-1.4463	5.79005	-9.20602	3.67377e-09	2.14522e-07	11.0623
4502	MT2A	16q13	-1.40934	7.02531	-9.19754	3.736e-09	2.16903e-07	10.9846
10381	TUBB3	16q24.3	1.49923	5.43198	9.18829	3.80509e-09	2.19652e-07	11.0728
50854	C6orf48	6p21.33	-1.15093	6.07135	-9.18518	3.82868e-09	2.19757e-07	10.9628
222	ALDH3B2	11q13.2	-1.15228	6.61996	-9.17901	3.87578e-09	2.21204e-07	10.8672
25987	TSKU	11q13.5	-1.05914	5.63891	-9.15401	4.07305e-09	2.30477e-07	10.8612
7846	TUBA1A	12q13.12	1.21782	6.71692	9.15267	4.08389e-09	2.30477e-07	10.8539
3021	H3F3B	17q25.1	-0.736286	10.989	-9.13356	4.24204e-09	2.38073e-07	10.5636
150468	CKAP2L	2q14.1	-2.7648	1.51956	-9.11001	4.44574e-09	2.48126e-07	10.6701
152926	PPM1K	4q22.1	-1.10783	4.81068	-9.1009	4.52718e-09	2.51283e-07	10.8028
64151	NCAPG	4p15.31	-3.41867	2.11644	-9.09402	4.58972e-09	2.53362e-07	10.7526
55920	RCC2	1p36.13	-0.738339	8.68806	-9.06925	4.82242e-09	2.64761e-07	10.518
79888	LPCAT1	5p15.33	0.847193	8.37849	9.05678	4.94409e-09	2.69974e-07	10.5159
64168	NECAB1	8q21.3	1.53542	4.27639	9.039	5.12319e-09	2.7825e-07	10.8056
83461	CDCA3	12p13.31	-2.22767	2.83774	-9.02936	5.22302e-09	2.82155e-07	10.8159
132671	SPATA18	4q12	2.35155	4.21216	9.00244	5.51261e-09	2.96215e-07	10.7723
114880	OSBPL6	2q31.2	-2.02269	4.07981	-8.99777	5.5646e-09	2.97426e-07	10.7682
3183	HNRNPC	14q11.2	-0.697857	9.43647	-8.98797	5.67517e-09	3.0174e-07	10.3236
83540	NUF2	1q23.3	-3.9299	2.01258	-8.98199	5.74368e-09	3.03784e-07	10.5002
9126	SMC3	10q25.2	-1.14014	6.57708	-8.92704	6.41555e-09	3.37552e-07	10.3782
149603	RNF187	1q42.13	-0.974222	6.65715	-8.91892	6.52145e-09	3.39935e-07	10.3671
699	BUB1	2q13	-2.37887	3.44599	-8.91841	6.52815e-09	3.39935e-07	10.6111
146691	TOM1L2	17p11.2	1.02547	6.64138	8.91082	6.62896e-09	3.43414e-07	10.3911
54458	PRR13	12q13.13	0.898956	6.98207	8.8924	6.8802e-09	3.54611e-07	10.2967
55789	DEPDC1B	5q12.1	-2.47608	3.07945	-8.88888	6.92925e-09	3.55327e-07	10.5072
6491	STIL	1p33	-1.94685	3.70725	-8.87834	7.07851e-09	3.61147e-07	10.5267
10541	ANP32B	9q22.33	-0.917925	8.16969	-8.86827	7.22431e-09	3.66734e-07	10.1309
9060	PAPSS2	10q23.2-q23.31	2.45585	4.85886	8.85135	7.47613e-09	3.77619e-07	10.4718
23741	EID1	15q21.1	0.828917	7.61405	8.80488	8.21537e-09	4.12894e-07	10.0333
9700	ESPL1	12q13.13	-3.1357	2.65806	-8.79404	8.39849e-09	4.20008e-07	10.3166
966	CD59	11p13	0.997967	8.07466	8.77132	8.79598e-09	4.37719e-07	9.95627
116461	TSEN15	1q25.3	-1.39222	4.92638	-8.7501	9.18466e-09	4.54821e-07	10.1925
6697	SPR	2p13.2	1.07427	6.21498	8.74134	9.35021e-09	4.6076e-07	10.0789
9764	KIAA0513	16q24.1	1.17174	6.2386	8.73629	9.44715e-09	4.63277e-07	10.1344
6281	S100A10	1q21.3	0.825417	9.34971	8.72729	9.62229e-09	4.69587e-07	9.8007
54058	C21orf58	21q22.3	-1.62547	4.31464	-8.69615	1.02549e-08	4.98053e-07	10.149
3833	KIFC1	6p21.32	-2.66148	3.51705	-8.67378	1.07357e-08	5.18908e-07	10.1275
80329	ULBP1	6q25.1	-2.44901	2.61375	-8.65228	1.12197e-08	5.3972e-07	9.92774
6782	HSPA13	21q11.2	-0.973182	5.84735	-8.63673	1.15835e-08	5.54582e-07	9.81451
5295	PIK3R1	5q13.1	1.40348	7.46986	8.63158	1.17069e-08	5.55309e-07	9.68345
7272	TTK	6q14.1	-2.48467	2.74527	-8.6294	1.17594e-08	5.55309e-07	10.0334
27244	SESN1	6q21	1.23241	5.44153	8.62923	1.17636e-08	5.55309e-07	9.92876
701	BUB1B	15q15.1	-2.11171	2.94923	-8.61285	1.21665e-08	5.71654e-07	10.0042
10236	HNRNPR	1p36.12	-0.885427	7.94488	-8.6026	1.2426e-08	5.78628e-07	9.59175
9768	PCLAF	15q22.31	-1.5569	4.12994	-8.60246	1.24294e-08	5.78628e-07	9.91515
899	CCNF	16p13.3	-1.18907	5.61491	-8.58368	1.29198e-08	5.97353e-07	9.78511
51734	MSRB1	16p13.3	1.05617	5.88238	8.58072	1.29989e-08	5.97353e-07	9.77969
6657	SOX2	3q26.33	-2.34465	3.36279	-8.58034	1.30091e-08	5.97353e-07	9.75364
355	FAS	10q23.31	3.03426	3.01539	8.56232	1.35018e-08	6.17172e-07	9.7557
54820	NDE1	16p13.11	-1.29659	5.02915	-8.5467	1.39445e-08	6.3454e-07	9.78235
81930	KIF18A	11p14.1	-2.26214	2.58636	-8.52968	1.44437e-08	6.54306e-07	9.78498
150696	PROM2	2q11.1	1.0347	7.27166	8.52218	1.46698e-08	6.61583e-07	9.50496
101927457	LINC01522	20q13.13	1.92247	3.36842	8.49883	1.53964e-08	6.91264e-07	9.77722
55839	CENPN	16q23.2	-1.45993	5.12048	-8.48782	1.57519e-08	7.0406e-07	9.61488
1051	CEBPB	20q13.13	-1.23829	4.70529	-8.48572	1.58208e-08	7.0406e-07	9.67264
57007	ACKR3	2q37.3	1.06816	7.12185	8.47962	1.60224e-08	7.09905e-07	9.46536
10525	HYOU1	11q23.3	-0.815065	8.75905	-8.47335	1.62323e-08	7.16065e-07	9.27423
10733	PLK4	4q28.1	-2.30103	2.8825	-8.4587	1.67335e-08	7.32008e-07	9.65585
8537	BCAS1	20q13.2	1.49474	6.82966	8.45856	1.67386e-08	7.32008e-07	9.50026
23635	SSBP2	5q14.1	-1.23317	5.67054	-8.4553	1.68524e-08	7.33806e-07	9.58281
55186	SLC25A36	3q23	-0.897277	6.71136	-8.44134	1.73485e-08	7.52166e-07	9.38459
643161	FAM25A	10q23.2	2.44508	2.25754	8.43186	1.76944e-08	7.63885e-07	9.4628
1174	AP1S1	7q22.1	0.801021	7.12136	8.41968	1.81486e-08	7.80157e-07	9.2807
2530	FUT8	14q23.3	0.802924	7.92638	8.40829	1.85846e-08	7.95514e-07	9.20409
387893	KMT5A	12q24.31	-0.920158	6.01464	-8.39722	1.90187e-08	8.10663e-07	9.36347
875	CBS	21q22.3	-2.23218	3.72962	-8.39304	1.91852e-08	8.11743e-07	9.56072
29948	OSGIN1	16q23.3	1.21696	4.47891	8.39255	1.92048e-08	8.11743e-07	9.50029
5209	PFKFB3	10p15.1	1.18375	5.98663	8.37632	1.98669e-08	8.36231e-07	9.32325
6990	DYNLT3	Xp11.4	1.22624	5.20122	8.37298	2.0006e-08	8.38593e-07	9.35263
2177	FANCD2	3p25.3	-1.51853	4.72328	-8.35482	2.078e-08	8.67435e-07	9.3687
3149	HMGB3	Xq28	-0.744576	7.60724	-8.33979	2.14439e-08	8.91467e-07	9.06665
57835	SLC4A5	2p13.1	-1.62841	3.45604	-8.32449	2.21421e-08	9.16721e-07	9.42279
23468	CBX5	12q13.13	-0.962156	7.30044	-8.29959	2.33293e-08	9.59856e-07	8.9913
51278	IER5	1q25.3	1.03552	7.24154	8.29868	2.3374e-08	9.59856e-07	9.03048
10769	PLK2	5q11.2	1.02821	9.45983	8.28467	2.40718e-08	9.84507e-07	8.86608
89958	SAPCD2	9q34.3	-0.988602	6.58854	-8.28062	2.42775e-08	9.88915e-07	9.02843
81610	FAM83D	20q11.23	-2.49646	3.21979	-8.27622	2.45032e-08	9.94103e-07	9.31174
896	CCND3	6p21.1	1.17077	5.14802	8.25662	2.55346e-08	1.0318e-06	9.18997
10926	DBF4	7q21.12	-1.36311	4.13096	-8.23772	2.65712e-08	1.06941e-06	9.19262
259266	ASPM	1q31.3	-3.27537	2.98615	-8.23326	2.68222e-08	1.07063e-06	9.22761
10133	OPTN	10p13	1.42061	4.68856	8.23167	2.69125e-08	1.07063e-06	9.21884
1786	DNMT1	19p13.2	-0.857169	6.86753	-8.23004	2.70047e-08	1.07063e-06	8.88175
10916	MAGED2	Xp11.21	0.728989	9.08274	8.22968	2.70253e-08	1.07063e-06	8.75612
378938	MALAT1	11q13.1	1.21851	9.114	8.22512	2.72866e-08	1.07676e-06	8.75019
94239	H2AFV	7p13	-0.766107	7.37561	-8.2108	2.81237e-08	1.10547e-06	8.80568
10109	ARPC2	2q35	0.720897	7.88059	8.20861	2.8254e-08	1.10629e-06	8.77012
9793	CKAP5	11p11.2	-0.754943	7.79753	-8.20595	2.84131e-08	1.108e-06	8.75451
54887	UHRF1BP1	6p21.31	-0.982177	5.70035	-8.20421	2.85172e-08	1.108e-06	8.98771
84617	TUBB6	18p11.21	0.956884	5.73378	8.20087	2.87194e-08	1.11158e-06	8.94095
8202	NCOA3	20q13.12	-0.695292	12.0949	-8.192	2.92629e-08	1.1283e-06	8.56329
54908	SPDL1	5q35.1	-1.72765	3.62311	-8.18862	2.94725e-08	1.13206e-06	9.13481
161145	TMEM229B	14q24.1	1.20601	4.37032	8.18647	2.96069e-08	1.13291e-06	9.09029
59	ACTA2	10q23.31	3.45707	2.41263	8.17363	3.04218e-08	1.1597e-06	8.726
10616	RBCK1	20p13	-1.01926	6.17413	-8.15551	3.16114e-08	1.20052e-06	8.82758
6781	STC1	8p21.2	1.03132	7.21201	8.15292	3.17853e-08	1.2026e-06	8.67041
156	GRK2	11q13.2	-0.781063	7.11198	-8.14887	3.2059e-08	1.20843e-06	8.71133
7157	TP53	17p13.1	-0.850037	6.25516	-8.14686	3.21961e-08	1.20909e-06	8.77353
9833	MELK	9p13.2	-1.56089	3.12186	-8.12677	3.35971e-08	1.25703e-06	9.01441
54892	NCAPG2	7q36.3	-1.36557	5.06749	-8.12378	3.3811e-08	1.26036e-06	8.83852
1476	CSTB	21q22.3	0.850448	7.71783	8.115	3.44471e-08	1.27935e-06	8.59693
4677	NARS	18q21.31	-0.669408	7.73083	-8.09602	3.5865e-08	1.32714e-06	8.52085
3694	ITGB6	2q24.2	1.64706	6.79833	8.09155	3.62074e-08	1.33492e-06	8.72969
995	CDC25C	5q31.2	-3.50397	1.58644	-8.06707	3.81437e-08	1.40119e-06	8.48746
51512	GTSE1	22q13.31	-2.512	2.96106	-8.05979	3.874e-08	1.41794e-06	8.8768
56992	KIF15	3p21.31	-2.78827	2.34572	-8.05409	3.92138e-08	1.4301e-06	8.84837
50484	RRM2B	8q22.3	1.17343	7.23786	8.04429	4.00416e-08	1.45504e-06	8.46949
81691	REXO5	16p12.3	-2.23122	2.62481	-8.01915	4.22493e-08	1.52976e-06	8.74299
113130	CDCA5	11q13.1	-1.5044	4.13594	-8.00647	4.34105e-08	1.56619e-06	8.66389
7076	TIMP1	Xp11.3	0.8608	6.58064	7.99857	4.41496e-08	1.58201e-06	8.40425
11100	HNRNPUL1	19q13.2	-0.626216	8.60537	-7.99844	4.41622e-08	1.58201e-06	8.26987
5954	RCN1	11p13	-1.06209	5.4421	-7.99261	4.4716e-08	1.59619e-06	8.54234
1515	CTSV	9q22.33	-2.19144	2.72524	-7.9871	4.52472e-08	1.60946e-06	8.62767
3875	KRT18	12q13.13	0.697525	12.5195	7.98192	4.57511e-08	1.62168e-06	8.08165
7499	XG	Xp22.33	2.39768	3.73356	7.96926	4.7009e-08	1.66044e-06	8.66025
23213	SULF1	8q13.2-q13.3	-2.07737	2.07504	-7.95416	4.85558e-08	1.70098e-06	8.62236
4605	MYBL2	20q13.12	-1.52487	5.52656	-7.95315	4.86614e-08	1.70098e-06	8.34784
64782	AEN	15q26.1	1.27871	5.47849	7.95195	4.87868e-08	1.70098e-06	8.44619
80303	EFHD1	2q37.1	-0.737958	6.87447	-7.95153	4.88303e-08	1.70098e-06	8.31811
53836	GPR87	3q25.1	2.79513	3.33691	7.93784	5.02865e-08	1.74249e-06	8.5453
79924	ADM2	22q13.33	-2.13254	3.13124	-7.9371	5.03668e-08	1.74249e-06	8.57774
29123	ANKRD11	16q24.3	-0.861275	7.48933	-7.93019	5.11203e-08	1.76251e-06	8.18629
3399	ID3	1p36.12	1.15637	6.24116	7.91447	5.28762e-08	1.81686e-06	8.38565
51776	MAP3K20	2q31.1	-0.758288	7.44325	-7.89554	5.5075e-08	1.88599e-06	8.12553
79966	SCD5	4q21.22	1.11513	6.01262	7.87751	5.72557e-08	1.95405e-06	8.26175
8992	ATP6V0E1	5q35.1	0.762217	7.64963	7.86931	5.82764e-08	1.98218e-06	8.06761
6603	SMARCD2	17q23.3	-0.629382	9.06011	-7.86416	5.89283e-08	1.99763e-06	7.95808
8479	HIRIP3	16p11.2	-1.66718	3.50932	-7.85301	6.03626e-08	2.03633e-06	8.44996
9212	AURKB	17p13.1	-3.03053	2.02121	-7.85217	6.04731e-08	2.03633e-06	8.40434
5982	RFC2	7q11.23	-1.26198	4.67557	-7.82261	6.44615e-08	2.16342e-06	8.26456
114294	LACTB	15q22.2	1.62042	4.70597	7.80957	6.63059e-08	2.21795e-06	8.32402
147841	SPC24	19p13.2	-1.92561	2.39888	-7.79176	6.89132e-08	2.29756e-06	8.31945
55215	FANCI	15q26.1	-1.27653	5.24325	-7.78802	6.94736e-08	2.30863e-06	8.05573
64087	MCCC2	5q13.2	0.748064	9.14183	7.78469	6.99761e-08	2.3177e-06	7.77386
60	ACTB	7p22.1	0.664971	11.3516	7.77102	7.20829e-08	2.37627e-06	7.66389
54677	CROT	7q21.12	1.18647	5.00631	7.77017	7.22148e-08	2.37627e-06	8.16213
134266	GRPEL2	5q32	-1.54212	4.13741	-7.7541	7.4779e-08	2.44656e-06	8.23294
55165	CEP55	10q23.33	-2.05974	3.3012	-7.75375	7.48355e-08	2.44656e-06	8.21375
55755	CDK5RAP2	9q33.2	-1.07766	5.4628	-7.74922	7.55758e-08	2.4628e-06	8.01747
10263	CDK2AP2	11q13.2	-1.00919	5.51614	-7.74652	7.60197e-08	2.46929e-06	8.01299
3301	DNAJA1	9p21.1	0.862013	7.28635	7.73669	7.76622e-08	2.51456e-06	7.79002
23062	GGA2	16p12.2	0.6705	7.30659	7.71356	8.16699e-08	2.63588e-06	7.71853
80216	ALPK1	4q25	-1.55184	3.91315	-7.70291	8.35861e-08	2.68913e-06	8.11833
26353	HSPB8	12q24.23	0.881487	5.98288	7.68862	8.623e-08	2.76538e-06	7.75325
166336	PRICKLE2	3p14.1	0.873094	6.3375	7.68575	8.67719e-08	2.77396e-06	7.79704
346389	MACC1	7p21.1	1.87011	4.3439	7.67846	8.81624e-08	2.80368e-06	8.08256
84057	MND1	4q31.3	-3.05745	1.22649	-7.67797	8.82568e-08	2.80368e-06	7.75539
115825	WDFY2	13q14.3	-1.22651	4.77866	-7.66803	9.01923e-08	2.85618e-06	7.95559
113791	PIK3IP1	22q12.2	1.06069	5.81414	7.66047	9.16951e-08	2.8947e-06	7.852
22926	ATF6	1q23.3	-0.779083	6.44213	-7.63666	9.65941e-08	3.03986e-06	7.64404
2335	FN1	2q35	-0.79968	7.09289	-7.61106	1.02161e-07	3.20506e-06	7.49126
9133	CCNB2	15q22.2	-1.9959	3.39683	-7.59574	1.05651e-07	3.30429e-06	7.89398
2899	GRIK3	1p34.3	-1.75048	3.33776	-7.58171	1.08951e-07	3.397e-06	7.87444
26271	FBXO5	6q25.2	-2.33004	2.91959	-7.56989	1.11816e-07	3.47558e-06	7.81887
8836	GGH	8q12.3	-2.08491	3.58775	-7.55848	1.14657e-07	3.55295e-06	7.80369
29781	NCAPH2	22q13.33	-1.15471	4.94288	-7.55411	1.15762e-07	3.57623e-06	7.68798
1191	CLU	8p21.1	0.772208	9.15503	7.54633	1.17759e-07	3.62684e-06	7.28073
1033	CDKN3	14q22.2	-1.96234	2.63061	-7.54131	1.19067e-07	3.65597e-06	7.78654
10018	BCL2L11	2q13	-0.851233	6.09669	-7.52424	1.23627e-07	3.78448e-06	7.4607
60401	EDA2R	Xq12	2.50924	2.72169	7.51118	1.27235e-07	3.88317e-06	7.62003
22979	EFR3B	2p23.3	0.983595	6.31284	7.49899	1.30702e-07	3.97696e-06	7.42575
8243	SMC1A	Xp11.22	-0.728148	7.3578	-7.49029	1.33234e-07	4.02825e-06	7.21628
59345	GNB4	3q26.33	-0.938196	5.16832	-7.49006	1.33303e-07	4.02825e-06	7.41784
57713	SFMBT2	10p14	-1.31646	4.55545	-7.48911	1.33584e-07	4.02825e-06	7.63443
54541	DDIT4	10q22.1	-1.4116	6.9094	-7.48551	1.34647e-07	4.04822e-06	7.28553
90417	KNSTRN	15q15.1	-1.83453	3.71146	-7.4824	1.35575e-07	4.06402e-06	7.63361
135398	C6orf141	6p12.3	0.890855	4.91597	7.46813	1.39918e-07	4.18182e-06	7.34294
7083	TK1	17q25.3	-1.50536	3.88	-7.46552	1.40728e-07	4.1936e-06	7.55366
79837	PIP4K2C	12q13.3	0.718966	6.77923	7.45826	1.43003e-07	4.24886e-06	7.23665
80119	PIF1	15q22.31	-3.14174	0.744905	-7.45158	1.45133e-07	4.29951e-06	7.06785
151648	SGO1	3p24.3	-2.86639	1.67455	-7.44729	1.46517e-07	4.32784e-06	7.41939
1164	CKS2	9q22.2	-1.23371	4.94272	-7.42588	1.5363e-07	4.5247e-06	7.34261
11130	ZWINT	10q21.1	-1.65981	4.21007	-7.41462	1.57512e-07	4.62554e-06	7.37541
10808	HSPH1	13q12.3	1.14694	6.05912	7.40454	1.61073e-07	4.71639e-06	7.20232
51330	TNFRSF12A	16p13.3	1.03779	7.50126	7.39215	1.65563e-07	4.83386e-06	7.04571
11340	EXOSC8	13q13.3	-1.25657	4.26241	-7.37147	1.73343e-07	5.04643e-06	7.36223
283431	GAS2L3	12q23.1	-2.29882	2.66972	-7.36783	1.74751e-07	5.07281e-06	7.41155
54443	ANLN	7p14.2	-1.64375	4.61099	-7.33475	1.88103e-07	5.43294e-06	7.11084
80346	REEP4	8p21.3	-1.03636	4.80727	-7.33444	1.88233e-07	5.43294e-06	7.16544
64946	CENPH	5q13.2	-1.83308	2.96426	-7.31025	1.98659e-07	5.71621e-06	7.29707
3312	HSPA8	11q24.1	0.680246	10.6131	7.30908	1.99179e-07	5.71621e-06	6.64325
90381	TICRR	15q26.1	-2.13289	2.69389	-7.30042	2.03064e-07	5.81121e-06	7.27307
5983	RFC3	13q13.2	-1.17387	4.45148	-7.28955	2.08053e-07	5.93716e-06	7.08796
1058	CENPA	2p23.3	-2.68534	2.42624	-7.28706	2.09216e-07	5.95352e-06	7.23405
25792	CIZ1	9q34.11	-0.638606	7.51871	-7.26969	2.17497e-07	6.16063e-06	6.72864
3326	HSP90AB1	6p21.1	0.536866	11.2407	7.26924	2.17714e-07	6.16063e-06	6.53475
653820	FAM72B	1p11.2	-2.87278	1.47413	-7.23929	2.32812e-07	6.56945e-06	6.83994
55355	HJURP	2q37.1	-2.47249	2.73051	-7.2339	2.35637e-07	6.63067e-06	7.12277
3151	HMGN2	1p36.11	-0.685203	9.2046	-7.23042	2.37486e-07	6.66412e-06	6.52998
116442	RAB39B	Xq28	-1.41498	4.37742	-7.21893	2.43678e-07	6.81893e-06	7.02749
10409	BASP1	5p15.1	1.34599	4.43246	7.21367	2.46573e-07	6.86604e-06	7.03688
64084	CLSTN2	3q23	-1.04199	7.62393	-7.2134	2.46721e-07	6.86604e-06	6.5874
93594	TBC1D31	8q24.13	-1.57894	3.33119	-7.1797	2.66121e-07	7.38559e-06	7.00645
1841	DTYMK	2q37.3	-1.2739	4.21538	-7.15588	2.80763e-07	7.77061e-06	6.86356
54431	DNAJC10	2q32.1	-0.685651	6.98855	-7.15234	2.83015e-07	7.78008e-06	6.46407
4171	MCM2	3q21.3	-1.23993	5.72756	-7.15223	2.83084e-07	7.78008e-06	6.57602
7837	PXDN	2p25.3	0.574824	8.57038	7.15171	2.83416e-07	7.78008e-06	6.38683
10072	DPP3	11q13.2	0.680459	7.04914	7.14766	2.86009e-07	7.80532e-06	6.49018
2896	GRN	17q21.31	0.740309	9.23715	7.14718	2.86323e-07	7.80532e-06	6.35507
91523	PCED1B	12q13.11	-1.64633	3.46561	-7.14666	2.86654e-07	7.80532e-06	6.9428
83463	MXD3	5q35.3	-2.11671	3.10015	-7.14284	2.89134e-07	7.8517e-06	6.93176
5310	PKD1	16p13.3	-1.08063	6.80032	-7.14148	2.90023e-07	7.85473e-06	6.52178
9635	CLCA2	1p22.3	1.38807	4.16264	7.13987	2.91072e-07	7.86206e-06	6.80905
9585	KIF20B	10q23.31	-1.57116	4.114	-7.13197	2.96305e-07	7.98207e-06	6.81256
2353	FOS	14q24.3	1.36165	6.26975	7.12928	2.98106e-07	8.00923e-06	6.50729
9424	KCNK6	19q13.2	0.807099	5.591	7.12683	2.99754e-07	8.01371e-06	6.61991
23225	NUP210	3p25.1	-0.751368	8.01711	-7.12654	2.99949e-07	8.01371e-06	6.34653
6596	HLTF	3q24	-0.674335	7.22645	-7.12519	3.00864e-07	8.01371e-06	6.40336
79094	CHAC1	15q15.1	-3.73122	1.01974	-7.12434	3.01446e-07	8.01371e-06	6.4943
580	BARD1	2q35	-1.40328	3.61691	-7.12224	3.02876e-07	8.03059e-06	6.85021
619279	ZNF704	8q21.13	-0.984474	6.47328	-7.11166	3.10193e-07	8.20306e-06	6.56533
9735	KNTC1	12q24.31	-1.21864	4.28828	-7.10878	3.12213e-07	8.22962e-06	6.73741
84985	FAM83A	8q24.13	-1.14231	5.16929	-7.10791	3.12827e-07	8.22962e-06	6.70978
79017	GGCT	7p14.3	-0.721361	7.01381	-7.10538	3.14623e-07	8.25537e-06	6.36466
8501	SLC43A1	11q12.1	-2.68404	3.44634	-7.09871	3.19395e-07	8.35888e-06	6.83031
9689	BZW1	2q33.1	0.643908	8.68733	7.09636	3.21092e-07	8.38158e-06	6.25072
1317	SLC31A1	9q32	-0.839369	6.16224	-7.08714	3.27851e-07	8.53595e-06	6.41349
79084	WDR77	1p13.2	0.804585	5.65813	7.0833	3.3071e-07	8.58826e-06	6.50509
79929	MAP6D1	3q27.1	1.5462	3.90755	7.07492	3.37034e-07	8.73005e-06	6.76339
113220	KIF12	9q32	0.873532	5.62812	7.07171	3.3949e-07	8.76912e-06	6.42769
107	ADCY1	7p12.3	0.972924	6.00598	7.07069	3.40279e-07	8.76912e-06	6.36884
10272	FSTL3	19p13.3	0.982543	5.43117	7.06149	3.47435e-07	8.92593e-06	6.54116
11168	PSIP1	9p22.3	-0.927074	6.11396	-7.06061	3.48131e-07	8.92593e-06	6.38192
84941	HSH2D	19p13.11	1.39067	3.81136	7.056	3.51779e-07	8.99664e-06	6.72223
780	DDR1	6p21.33	0.640545	9.12894	7.05294	3.54227e-07	9.032e-06	6.13763
377	ARF3	12q13.12	0.537988	9.02673	7.05204	3.5495e-07	9.032e-06	6.13781
5315	PKM	15q23	0.602648	10.8648	7.05076	3.55974e-07	9.0353e-06	6.04103
3797	KIF3C	2p23.3	1.16751	5.21441	7.04706	3.58971e-07	9.08852e-06	6.55451
65108	MARCKSL1	1p35.1	0.722916	8.30892	7.0441	3.61386e-07	9.12679e-06	6.1631
64747	MFSD1	3q25.32	0.812813	6.03645	7.03981	3.6492e-07	9.19308e-06	6.40223
8031	NCOA4	10q11.22	0.640198	8.02871	7.03023	3.72933e-07	9.37156e-06	6.11989
6749	SSRP1	11q12.1	-0.633194	7.23453	-7.02285	3.79221e-07	9.50594e-06	6.16763
1632	ECI1	16p13.3	-0.826427	6.30384	-7.01656	3.84673e-07	9.61872e-06	6.26114
4277	MICB	6p21.33	1.81572	3.39645	7.01512	3.8593e-07	9.62633e-06	6.65502
91433	RCCD1	15q26.1	-1.15038	4.12697	-7.01218	3.88519e-07	9.65767e-06	6.53599
5912	RAP2B	3q25.2	0.922193	5.58018	7.01152	3.89098e-07	9.65767e-06	6.36411
51060	TXNDC12	1p32.3	-0.711257	6.43197	-6.98899	4.09523e-07	1.01397e-05	6.17833
4212	MEIS2	15q14	-1.3214	3.98055	-6.98753	4.10891e-07	1.01487e-05	6.5623
10121	ACTR1A	10q24.32	0.797754	6.02676	6.98549	4.128e-07	1.01709e-05	6.26469
8673	VAMP8	2p11.2	0.744733	7.07327	6.9832	4.14956e-07	1.01709e-05	6.13628
65059	RAPH1	2q33.2	-0.801241	6.48707	-6.9829	4.15238e-07	1.01709e-05	6.20237
4904	YBX1	1p34.2	-0.565725	8.43347	-6.98229	4.15815e-07	1.01709e-05	5.9748
10205	MPZL2	11q23.3	1.0389	5.09743	6.96879	4.28776e-07	1.04625e-05	6.3644
8655	DYNLL1	12q24.31	0.763945	7.0359	6.96089	4.36553e-07	1.06266e-05	6.05806
10974	ADIRF	10q23.2	1.59422	3.81211	6.95383	4.43633e-07	1.0773e-05	6.51941
23279	NUP160	11p11.2	-0.872536	6.18665	-6.94947	4.48057e-07	1.08544e-05	6.12006
9500	MAGED1	Xp11.22	0.656252	7.38054	6.94541	4.52216e-07	1.09289e-05	5.96947
440145	MZT1	13q21.33	-1.17785	4.28791	-6.94365	4.54034e-07	1.09467e-05	6.37777
79733	E2F8	11p15.1	-2.03199	2.78475	-6.93989	4.57939e-07	1.10145e-05	6.49076
352954	CASTOR3	7q22.1	1.18983	4.95398	6.93429	4.63826e-07	1.11296e-05	6.34808
200916	RPL22L1	3q26.2	1.13977	5.85131	6.93317	4.65012e-07	1.11316e-05	6.11438
54845	ESRP1	8q22.1	-0.76426	7.71634	-6.92114	4.77944e-07	1.14142e-05	5.88852
8148	TAF15	17q12	-0.682696	6.98008	-6.90809	4.9239e-07	1.17314e-05	5.91534
1845	DUSP3	17q21.31	0.942476	5.71046	6.90554	4.95273e-07	1.17723e-05	6.15766
55779	CFAP44	3q13.2	1.26752	4.9332	6.89363	5.08928e-07	1.20685e-05	6.26764
10626	TRIM16	17p12	0.934707	5.31495	6.88318	5.21228e-07	1.23313e-05	6.16346
8493	PPM1D	17q23.2	0.628829	8.52987	6.87917	5.26034e-07	1.24159e-05	5.75239
51087	YBX2	17p13.1	-1.36441	3.85437	-6.87758	5.27941e-07	1.24318e-05	6.3069
55343	SLC35C1	11p11.2	1.04701	5.85081	6.85541	5.55416e-07	1.30484e-05	6.03122
10202	DHRS2	14q11.2	1.40152	6.47696	6.85392	5.57315e-07	1.30626e-05	5.76549
12	SERPINA3	14q32.13	0.966576	7.80877	6.84613	5.67356e-07	1.32672e-05	5.62391
84790	TUBA1C	12q13.12	-0.659913	7.78397	-6.8409	5.74198e-07	1.33962e-05	5.68909
6626	SNRPA	19q13.2	-0.816922	6.14162	-6.83966	5.75829e-07	1.34033e-05	5.86093
84002	B3GNT5	3q27.1	-2.06645	3.2782	-6.83476	5.82333e-07	1.35235e-05	6.25447
100288637	LOC100288637	15q13.2	-2.71311	1.8148	-6.82762	5.9194e-07	1.37151e-05	6.0531
7430	EZR	6q25.3	0.62553	8.4473	6.82559	5.94701e-07	1.37475e-05	5.63449
6451	SH3BGRL	Xq21.1	0.983483	8.36274	6.82335	5.97766e-07	1.37868e-05	5.65975
51523	CXXC5	5q31.2	0.698437	6.88109	6.8167	6.06956e-07	1.39669e-05	5.738
2274	FHL2	2q12.2	1.56319	3.44816	6.81174	6.13909e-07	1.40948e-05	6.16302
59286	UBL5	19p13.2	0.780903	6.67286	6.8061	6.21908e-07	1.42461e-05	5.74887
55320	MIS18BP1	14q21.2	-1.38035	4.50006	-6.7928	6.41195e-07	1.46539e-05	6.01529
57405	SPC25	2q24.3	-2.48201	1.31416	-6.79184	6.42612e-07	1.46539e-05	6.09737
8892	EIF2B2	14q24.3	0.832618	5.35825	6.79007	6.45237e-07	1.46806e-05	5.90297
29984	RHOD	11q13.2	0.927227	6.24695	6.76098	6.89866e-07	1.56607e-05	5.7139
5600	MAPK11	22q13.33	1.8099	3.67557	6.75986	6.91647e-07	1.5666e-05	6.09429
26147	PHF19	9q33.2	-1.37758	4.10135	-6.75782	6.94914e-07	1.57047e-05	6.0412
961	CD47	3q13.12	0.585173	8.19291	6.74491	7.15883e-07	1.61425e-05	5.46328
9531	BAG3	10q26.11	0.813992	8.64706	6.74335	7.18451e-07	1.61643e-05	5.44196
79682	CENPU	4q35.1	-1.55005	3.42128	-6.73104	7.39135e-07	1.65928e-05	5.90754
5998	RGS3	9q32	-1.00055	5.03526	-6.72823	7.43941e-07	1.66636e-05	5.80267
116236	ABHD15	17q11.2	1.30436	4.73515	6.71031	7.75334e-07	1.73284e-05	5.87225
5831	PYCR1	17q25.3	-0.702545	6.82616	-6.70878	7.78081e-07	1.73514e-05	5.45221
54626	HES2	1p36.31	2.50457	2.994	6.70457	7.85674e-07	1.74821e-05	5.873
9786	KIAA0586	14q23.1	-1.32651	4.01314	-6.70344	7.87722e-07	1.74892e-05	5.9163
221150	SKA3	13q12.11	-2.54137	2.20983	-6.70188	7.90572e-07	1.75139e-05	5.94378
27316	RBMX	Xq26.3	-0.581321	8.3092	-6.69964	7.94665e-07	1.75661e-05	5.33882
23255	MTCL1	18p11.22	0.908558	5.95836	6.69473	8.03741e-07	1.77279e-05	5.64125
83857	TMTC1	12p11.22	-0.92832	5.75006	-6.67771	8.35982e-07	1.83989e-05	5.56942
23057	NMNAT2	1q25.3	1.8149	3.11987	6.66288	8.65146e-07	1.89994e-05	5.8561
56999	ADAMTS9	3p14.1	1.49713	3.06741	6.6507	8.89899e-07	1.95006e-05	5.84035
114569	MAL2	8q24.12	-0.699383	8.58965	-6.64186	9.08306e-07	1.98608e-05	5.20228
9924	PAN2	12q13.3	-0.674601	6.80597	-6.6401	9.12014e-07	1.98988e-05	5.33991
55723	ASF1B	19p13.12	-1.40177	3.73602	-6.63173	9.29859e-07	2.02445e-05	5.69847
9021	SOCS3	17q25.3	1.10855	5.41514	6.62118	9.52886e-07	2.07012e-05	5.56607
2805	GOT1	10q24.2	-0.75495	5.78353	-6.61292	9.71329e-07	2.10566e-05	5.38563
89927	C16orf45	16p13.11	1.40085	3.97076	6.61113	9.75373e-07	2.10682e-05	5.72194
79807	GSTCD	4q24	-0.998643	4.37855	-6.61033	9.77177e-07	2.10682e-05	5.62782
8894	EIF2S2	20q11.22	-0.666727	7.57157	-6.60992	9.78122e-07	2.10682e-05	5.16936
7869	SEMA3B	3p21.31	0.857823	5.6579	6.59496	1.01267e-06	2.17659e-05	5.31464
84981	MIR22HG	17p13.3	2.22482	2.90579	6.5726	1.06668e-06	2.28737e-05	5.62436
1027	CDKN1B	12p13.1	-0.878431	5.99253	-6.57177	1.06874e-06	2.28737e-05	5.29192
5993	RFX5	1q21.3	0.675582	7.48324	6.53857	1.15459e-06	2.4659e-05	5.03339
11064	CNTRL	9q33.2	-1.78418	3.19484	-6.53547	1.16296e-06	2.47854e-05	5.57943
1649	DDIT3	12q13.3	-1.46658	4.0709	-6.53137	1.17413e-06	2.49707e-05	5.53282
10938	EHD1	11q13.1	0.725795	6.23786	6.5289	1.18091e-06	2.5062e-05	5.15623
10469	TIMM44	19p13.2	-1.04193	4.89122	-6.52247	1.19873e-06	2.53869e-05	5.35004
4907	NT5E	6q14.3	1.84331	3.81054	6.50725	1.24203e-06	2.6249e-05	5.53105
23193	GANAB	11q12.3	-0.540434	9.74057	-6.50598	1.24573e-06	2.62721e-05	4.81586
5791	PTPRE	10q26.2	1.60666	3.62738	6.50412	1.25115e-06	2.6306e-05	5.51941
2870	GRK6	5q35.3	-0.878381	5.71188	-6.50364	1.25254e-06	2.6306e-05	5.15829
22943	DKK1	10q21.1	1.44855	5.72077	6.49422	1.28039e-06	2.6835e-05	5.16334
3423	IDS	Xq28	0.527712	8.2185	6.48678	1.30284e-06	2.7249e-05	4.85059
1111	CHEK1	11q24.2	-1.1996	3.85092	-6.48491	1.30852e-06	2.73114e-05	5.3197
100507436	MICA	6p21.33	1.14614	4.60214	6.48236	1.31634e-06	2.74109e-05	5.33394
84612	PARD6B	20q13.13	0.711324	7.73207	6.48159	1.31872e-06	2.74109e-05	4.82936
119391	GSTO2	10q25.1	-1.13291	4.38369	-6.46765	1.36238e-06	2.82163e-05	5.32806
154141	MBOAT1	6p22.3	0.925158	5.14007	6.46744	1.36305e-06	2.82163e-05	5.16891
23306	NEMP1	12q13.3	-1.02302	4.37278	-6.46213	1.38006e-06	2.851e-05	5.20067
51097	SCCPDH	1q44	0.925412	5.43769	6.46101	1.38368e-06	2.85264e-05	5.18768
10721	POLQ	3q13.33	-1.33347	3.36602	-6.44689	1.43017e-06	2.94247e-05	5.35715
57189	KIAA1147	7q34	-0.647704	6.93278	-6.43708	1.46339e-06	3.00471e-05	4.88724
8416	ANXA9	1q21.3	0.673248	6.94176	6.43042	1.4864e-06	3.04027e-05	4.82754
91687	CENPL	1q25.1	-1.85197	2.64557	-6.43032	1.48673e-06	3.04027e-05	5.35075
1891	ECH1	19q13.2	-0.589133	7.75587	-6.42728	1.49738e-06	3.05587e-05	4.74771
8934	RAB29	1q32.1	0.824427	6.30573	6.42454	1.50702e-06	3.06204e-05	4.91338
10274	STAG1	3q22.3	-0.891131	5.98713	-6.42398	1.50897e-06	3.06204e-05	4.94382
5984	RFC4	3q27.3	-1.23347	4.13585	-6.42383	1.5095e-06	3.06204e-05	5.2007
5493	PPL	16p13.3	0.618027	7.5774	6.4209	1.5199e-06	3.07116e-05	4.77357
414149	ACBD7	10p13	-1.36976	3.61335	-6.42086	1.52007e-06	3.07116e-05	5.27201
4841	NONO	Xq13.1	-0.48661	9.37495	-6.41832	1.52915e-06	3.08332e-05	4.62744
84823	LMNB2	19p13.3	-0.699983	6.34457	-6.4131	1.54795e-06	3.11502e-05	4.83639
9789	SPCS2	11q13.4	-0.618449	6.61746	-6.41158	1.55347e-06	3.11991e-05	4.81823
54478	PIMREG	17p13.2	-2.29338	1.13034	-6.39295	1.62289e-06	3.25286e-05	5.2154
967	CD63	12q13.2	0.581446	9.06698	6.39098	1.63039e-06	3.26143e-05	4.57967
6525	SMTN	22q12.2	-1.07462	4.70439	-6.38209	1.66476e-06	3.32359e-05	5.04882
151246	SGO2	2q33.1	-1.35572	3.21853	-6.37622	1.68787e-06	3.36309e-05	5.16414
116151	FAM210B	20q13.2	0.700136	7.86081	6.37073	1.7098e-06	3.40007e-05	4.61693
5557	PRIM1	12q13.3	-2.00089	3.15417	-6.36796	1.72094e-06	3.4154e-05	5.19071
57463	AMIGO1	1p13.3	1.17857	4.62319	6.36714	1.72427e-06	3.4154e-05	5.1294
64105	CENPK	5q12.3	-1.61833	2.01046	-6.355	1.77419e-06	3.50742e-05	5.19508
114787	GPRIN1	5q35.2	1.47007	3.63783	6.34824	1.80259e-06	3.5566e-05	5.1659
8553	BHLHE40	3p26.1	0.69545	7.20321	6.34641	1.81038e-06	3.565e-05	4.59882
7068	THRB	3p24.2	-0.810209	5.2677	-6.34284	1.82566e-06	3.58442e-05	4.81741
26999	CYFIP2	5q33.3	0.922669	6.05058	6.34245	1.82734e-06	3.58442e-05	4.78963
9772	TMEM94	17q25.1	-0.659412	7.1675	-6.33852	1.84431e-06	3.6107e-05	4.60581
55959	SULF2	20q13.12	0.515784	11.3483	6.32612	1.89891e-06	3.71041e-05	4.32201
146909	KIF18B	17q21.31	-2.14491	1.61053	-6.3219	1.91788e-06	3.74024e-05	5.11277
2887	GRB10	7p12.1	-0.867124	5.48446	-6.30606	1.99081e-06	3.87499e-05	4.73135
125058	TBC1D16	17q25.3	-0.663276	7.10576	-6.29951	2.02177e-06	3.92768e-05	4.49493
10512	SEMA3C	7q21.11	0.564282	8.65402	6.28614	2.08657e-06	4.04578e-05	4.33045
55654	TMEM127	2q11.2	0.591757	6.84779	6.28388	2.09772e-06	4.05961e-05	4.5325
54978	SLC35F6	2p23.3	0.741878	6.14708	6.27713	2.13138e-06	4.11687e-05	4.55717
6558	SLC12A2	5q23.3	1.02194	6.66603	6.27584	2.13789e-06	4.12155e-05	4.56402
79019	CENPM	22q13.2	-2.01436	2.00817	-6.27317	2.15141e-06	4.13973e-05	5.01026
637	BID	22q11.21	0.955737	5.38739	6.2625	2.20631e-06	4.22417e-05	4.67076
4926	NUMA1	11q13.4	-0.678374	8.62994	-6.26237	2.20697e-06	4.22417e-05	4.30634
65265	C8orf33	8q24.3	-0.606696	6.61476	-6.2622	2.20784e-06	4.22417e-05	4.46431
29995	LMCD1	3p25.3	0.901116	5.48702	6.25997	2.21954e-06	4.23852e-05	4.69875
5441	POLR2L	11p15.5	0.907169	5.964	6.25283	2.25731e-06	4.30251e-05	4.55919
7913	DEK	6p22.3	-0.819169	6.83435	-6.24915	2.27698e-06	4.33184e-05	4.40037
9114	ATP6V0D1	16q22.1	0.583987	7.16826	6.2431	2.3098e-06	4.37931e-05	4.38161
399665	FAM102A	9q34.11	0.639465	7.9537	6.24295	2.31061e-06	4.37931e-05	4.2814
8570	KHSRP	19p13.3	-0.588786	7.46202	-6.23592	2.34934e-06	4.44439e-05	4.30943
389	RHOC	1p13.2	0.666632	9.18565	6.22463	2.41296e-06	4.5562e-05	4.18934
57082	KNL1	15q15.1	-2.18202	2.04275	-6.2222	2.42683e-06	4.57386e-05	4.89646
8996	NOL3	16q22.1	0.836615	5.6735	6.21559	2.46513e-06	4.63739e-05	4.52842
3860	KRT13	17q21.2	4.56103	-0.652074	6.20916	2.50294e-06	4.69976e-05	4.22101
130271	PLEKHH2	2p21	-1.67722	4.00403	-6.20477	2.5291e-06	4.73448e-05	4.82806
10376	TUBA1B	12q13.12	-0.895062	8.46211	-6.20448	2.53081e-06	4.73448e-05	4.12539
2146	EZH2	7q36.1	-0.845684	5.31612	-6.20139	2.54942e-06	4.76049e-05	4.48683
7739	ZNF185	Xq28	0.84569	5.67617	6.18813	2.63077e-06	4.90333e-05	4.44318
285362	SUMF1	3p26.1	0.685915	6.76262	6.18334	2.66086e-06	4.95027e-05	4.3004
6560	SLC12A4	16q22.1	2.488	2.25185	6.18151	2.67239e-06	4.96258e-05	4.6921
10988	METAP2	12q22	-0.575365	7.04556	-6.17866	2.69055e-06	4.98715e-05	4.21724
132660	LIN54	4q21.22	-1.20361	4.38674	-6.17697	2.70134e-06	4.99798e-05	4.6448
7045	TGFBI	5q31.1	-1.5795	3.20613	-6.17133	2.73769e-06	5.05596e-05	4.75045
6941	TCF19	6p21.33	-1.53203	3.10657	-6.16537	2.77668e-06	5.11862e-05	4.71097
10038	PARP2	14q11.2	-1.05344	4.29672	-6.16345	2.78939e-06	5.13268e-05	4.58434
9319	TRIP13	5p15.33	-1.10796	4.04144	-6.15749	2.82914e-06	5.19636e-05	4.52906
10103	TSPAN1	1p34.1	0.773004	5.84265	6.15471	2.84788e-06	5.21256e-05	4.37985
10456	HAX1	1q21.3	-0.668429	7.07347	-6.15465	2.84828e-06	5.21256e-05	4.14079
9738	CCP110	16p12.3	-1.03363	5.09889	-6.14091	2.94272e-06	5.37565e-05	4.403
3313	HSPA9	5q31.2	-0.526096	8.92809	-6.13596	2.97754e-06	5.42944e-05	3.96046
64787	EPS8L2	11p15.5	0.807283	6.67449	6.13028	3.01805e-06	5.48711e-05	4.19678
26512	INTS6	13q14.3	-0.725699	6.22988	-6.13	3.02003e-06	5.48711e-05	4.21961
7422	VEGFA	6p21.1	-0.780647	6.47124	-6.12115	3.08425e-06	5.59373e-05	4.10824
23534	TNPO3	7q32.1	-0.675365	5.80391	-6.11505	3.12928e-06	5.66523e-05	4.23878
5476	CTSA	20q13.12	0.580132	9.0803	6.11051	3.16328e-06	5.71654e-05	3.9214
493	ATP2B4	1q32.1	0.783884	5.77331	6.10282	3.22172e-06	5.81176e-05	4.16793
6628	SNRPB	20p13	-0.58309	7.01647	-6.08951	3.32538e-06	5.98806e-05	3.99401
5528	PPP2R5D	6p21.1	-0.702449	6.29679	-6.07776	3.41981e-06	6.12718e-05	4.07233
55640	FLVCR2	14q24.3	1.00355	4.57503	6.07774	3.41995e-06	6.12718e-05	4.35071
57282	SLC4A10	2q24.2	-1.62118	3.66213	-6.07719	3.42444e-06	6.12718e-05	4.17499
666	BOK	2q37.3	0.801449	5.76131	6.07638	3.43107e-06	6.12718e-05	4.16643
51566	ARMCX3	Xq22.1	0.597954	6.92876	6.07615	3.43297e-06	6.12718e-05	3.96401
8870	IER3	6p21.33	0.631873	7.01415	6.07516	3.44104e-06	6.13075e-05	3.94089
728833	FAM72D	1q21.1	-3.46969	0.666969	-6.06835	3.49739e-06	6.21689e-05	4.07622
6187	RPS2	16p13.3	-0.48612	11.257	-6.06783	3.50169e-06	6.21689e-05	3.69729
11057	ABHD2	15q26.1	0.518584	7.4472	6.06227	3.54839e-06	6.28874e-05	3.86526
8175	SF3A2	19p13.3	-1.03588	5.52424	-6.05679	3.59509e-06	6.36034e-05	4.18966
1604	CD55	1q32.2	-0.611784	7.48888	-6.05342	3.62409e-06	6.40045e-05	3.88736
9518	GDF15	19p13.11	1.25148	4.53761	6.05024	3.65173e-06	6.43801e-05	4.2562
9537	TP53I11	11p11.2	-0.724669	6.55234	-6.04883	3.66396e-06	6.44832e-05	3.99
5376	PMP22	17p12	1.4612	6.79735	6.04203	3.72392e-06	6.54245e-05	4.01448
10946	SF3A3	1p34.3	-0.577408	6.93399	-6.04128	3.73062e-06	6.54283e-05	3.88563
55619	DOCK10	2q36.2	1.68708	2.90269	6.03991	3.74282e-06	6.55286e-05	4.47663
9459	ARHGEF6	Xq26.3	-1.28868	4.1497	-6.03261	3.80867e-06	6.65661e-05	4.36535
9528	TMEM59	1p32.3	0.556675	7.59752	6.01608	3.96203e-06	6.91268e-05	3.79588
23158	TBC1D9	4q31.21	0.691827	8.41871	6.00611	4.05751e-06	7.06706e-05	3.69262
5176	SERPINF1	17p13.3	1.50739	2.88568	6.00405	4.0776e-06	7.08664e-05	4.38563
57828	CATSPERG	19q13.2	1.37923	4.45354	6.00352	4.08278e-06	7.08664e-05	4.32026
8318	CDC45	22q11.21	-1.42799	2.73603	-6.00153	4.10223e-06	7.10819e-05	4.31713
6452	SH3BP2	4p16.3	-0.760256	6.05876	-6.00025	4.11477e-06	7.1177e-05	3.92577
6231	RPS26	12q13.2	0.596331	6.82925	5.99726	4.14427e-06	7.15648e-05	3.80594
1999	ELF3	1q32.1	0.678153	6.56123	5.99171	4.19967e-06	7.23978e-05	3.89575
10134	BCAP31	Xq28	0.552078	8.6962	5.9902	4.21487e-06	7.25359e-05	3.63903
22995	CEP152	15q21.1	-1.72557	2.27882	-5.98638	4.25354e-06	7.30769e-05	4.36172
123169	LEO1	15q21.2	-0.569117	7.64004	-5.97555	4.36521e-06	7.48682e-05	3.67361
9540	TP53I3	2p23.3	1.8262	3.60937	5.95628	4.57142e-06	7.8272e-05	4.27496
138151	NACC2	9q34.3	0.862548	5.78075	5.95356	4.60125e-06	7.86495e-05	3.90935
5356	PLRG1	4q31.3	-0.641958	5.84676	-5.95047	4.63553e-06	7.90309e-05	3.81712
3710	ITPR3	6p21.31	-0.64679	7.68674	-5.95013	4.63921e-06	7.90309e-05	3.61733
148327	CREB3L4	1q21.3	-0.540243	7.3844	-5.93018	4.8665e-06	8.27633e-05	3.60172
2091	FBL	19q13.2	-0.535708	7.0946	-5.92891	4.88133e-06	8.2876e-05	3.57819
151188	ARL6IP6	2q23.3	-1.37165	3.53537	-5.92764	4.89623e-06	8.29894e-05	4.18528
101927994	LINC01087	2q21.1	2.44797	2.32021	5.92501	4.92729e-06	8.33761e-05	4.19013
3930	LBR	1q42.12	-1.51473	3.5531	-5.9242	4.93679e-06	8.33971e-05	4.16554
55827	DCAF6	1q24.2	0.536254	7.1602	5.90857	5.12555e-06	8.64412e-05	3.56856
54930	HAUS4	14q11.2	-0.893915	5.33089	-5.90621	5.15472e-06	8.67883e-05	3.81598
85012	TCEAL3	Xq22.2	0.77848	5.77455	5.90501	5.16956e-06	8.68933e-05	3.74958
7443	VRK1	14q32.2	-0.934391	4.29642	-5.89926	5.24146e-06	8.79556e-05	3.91465
399694	SHC4	15q21.1	2.24112	2.76286	5.89811	5.25592e-06	8.80519e-05	4.11503
489	ATP2A3	17p13.2	0.597396	7.34342	5.89507	5.29448e-06	8.8452e-05	3.5598
23234	DNAJC9	10q22.2	-0.706691	5.41172	-5.89484	5.29731e-06	8.8452e-05	3.70327
8910	SGCE	7q21.3	-1.57805	3.33595	-5.8898	5.36191e-06	8.93829e-05	4.11483
22794	CASC3	17q21.1	-0.741461	6.40028	-5.88728	5.39439e-06	8.97762e-05	3.58588
57326	PBXIP1	1q21.3	0.610148	7.39143	5.88612	5.40946e-06	8.98789e-05	3.49293
25886	POC1A	3p21.2	-1.75259	2.42616	-5.88372	5.44084e-06	9.02518e-05	4.12991
4253	MIA2	14q21.1	-0.737052	5.65916	-5.86738	5.65881e-06	9.36242e-05	3.63419
93129	ORAI3	16p11.2	0.821738	5.40178	5.86709	5.66268e-06	9.36242e-05	3.75738
83695	RHNO1	12p13.33	-0.80943	4.99138	-5.86448	5.6984e-06	9.40608e-05	3.72773
2316	FLNA	Xq28	0.597726	10.293	5.86333	5.71415e-06	9.4167e-05	3.25279
9582	APOBEC3B	22q13.1	-1.53084	3.39928	-5.85885	5.77604e-06	9.50319e-05	4.06206
55062	WIPI1	17q24.2	0.766901	5.5412	5.85454	5.8363e-06	9.58672e-05	3.65385
3033	HADH	4q25	-0.656307	5.77652	-5.85367	5.84854e-06	9.59122e-05	3.58581
727	C5	9q33.2	-2.18628	1.9249	-5.84796	5.9295e-06	9.70823e-05	3.9724
4521	NUDT1	7p22.3	-1.4607	3.02567	-5.84393	5.98725e-06	9.78505e-05	3.99862
27175	TUBG2	17q21.2	1.17785	3.90519	5.84334	5.99579e-06	9.78505e-05	3.95256
79572	ATP13A3	3q29	-0.578226	7.2526	-5.84263	6.00597e-06	9.78586e-05	3.38287
84148	KAT8	16p11.2	-0.75755	5.24332	-5.84066	6.03458e-06	9.81664e-05	3.69206
8914	TIMELESS	12q13.3	-0.867452	5.51105	-5.83864	6.06393e-06	9.84189e-05	3.53813
6382	SDC1	2p24.1	0.612193	7.57373	5.83817	6.07085e-06	9.84189e-05	3.35176
79102	RNF26	11q23.3	-0.663104	5.88674	-5.83759	6.07933e-06	9.84189e-05	3.54723
5833	PCYT2	17q25.3	0.796914	5.45869	5.83487	6.11923e-06	9.89063e-05	3.66012
10574	CCT7	2p13.2	0.457004	8.4322	5.83102	6.17627e-06	9.96689e-05	3.25379
92521	SPECC1	17p11.2	0.800169	5.75298	5.82956	6.19805e-06	9.98607e-05	3.59637
729375	FAM86HP	3q22.1	1.42095	4.70803	5.82497	6.26692e-06	0.00010081	3.92777
8877	SPHK1	17q25.1	1.50758	3.80315	5.82031	6.33768e-06	0.000101786	3.94907
54549	SDK2	17q25.1	1.1694	3.86946	5.81564	6.40949e-06	0.000102776	3.83919
284184	NDUFAF8	17q25.3	1.07781	4.22405	5.81019	6.49413e-06	0.000103968	3.76917
57222	ERGIC1	5q35.1	-0.520893	9.49701	-5.80162	6.6297e-06	0.00010597	3.14077
5305	PIP4K2A	10p12.2	-0.650863	5.91304	-5.80069	6.64462e-06	0.000106041	3.41468
10664	CTCF	16q22.1	-0.550302	7.10861	-5.79852	6.67951e-06	0.000106342	3.2938
29957	SLC25A24	1p13.3	0.550529	8.23041	5.79813	6.6858e-06	0.000106342	3.17
57758	SCUBE2	11p15.4	0.831641	6.97329	5.79756	6.69506e-06	0.000106342	3.30408
284403	WDR62	19q13.12	-2.16252	2.61168	-5.7908	6.80505e-06	0.000107919	3.90826
3717	JAK2	9p24.1	1.10265	3.82965	5.7884	6.84465e-06	0.000108377	3.73152
57658	CALCOCO1	12q13.13	0.691219	6.42267	5.77806	7.01745e-06	0.000110939	3.40984
823	CAPN1	11q13.1	0.509178	8.06131	5.7677	7.19522e-06	0.000113572	3.13891
2717	GLA	Xq22.1	0.78978	4.66568	5.76687	7.20979e-06	0.000113624	3.48615
100093631	GTF2IP4	7q11.23	0.686192	6.42568	5.75009	7.508e-06	0.00011814	3.31648
9926	LPGAT1	1q32.3	0.616846	6.47671	5.74928	7.52261e-06	0.000118186	3.25311
4953	ODC1	2p25.1	-0.595366	6.55466	-5.73941	7.70431e-06	0.000120852	3.20358
84986	ARHGAP19	10q24.1	-1.20873	3.95275	-5.73849	7.72139e-06	0.000120933	3.64018
79873	NUDT18	8p21.3	1.60851	2.94057	5.73674	7.75418e-06	0.000121258	3.79332
112770	GLMP	1q22	0.793616	5.37721	5.73586	7.77065e-06	0.000121328	3.448
26152	ZNF337	20p11.21	0.858359	5.49076	5.72981	7.8852e-06	0.000122926	3.39527
6302	TSPAN31	12q14.1	0.660379	6.30965	5.72788	7.92217e-06	0.000123312	3.25169
3309	HSPA5	9q33.3	-0.409563	10.6206	-5.71303	8.2119e-06	0.000127626	2.8638
3799	KIF5B	10p11.22	-0.599465	7.76471	-5.71226	8.22719e-06	0.000127667	3.00145
79143	MBOAT7	19q13.42	0.663636	7.61947	5.70882	8.29595e-06	0.000128536	3.04198
5869	RAB5B	12q13.2	0.499485	8.33096	5.70682	8.33623e-06	0.000128963	2.97649
132720	FAM241A	4q25	-0.842133	5.55169	-5.70115	8.45155e-06	0.000130547	3.22997
80162	PGGHG	11p15.5	1.11805	4.22315	5.69873	8.50123e-06	0.000130936	3.56081
79077	DCTPP1	16p11.2	0.556409	6.32411	5.69866	8.50266e-06	0.000130936	3.13375
26994	RNF11	1p32.3	0.539312	7.12094	5.69334	8.61292e-06	0.000132432	3.04502
79627	OGFRL1	6q13	0.891643	5.7048	5.68821	8.72066e-06	0.000133885	3.23928
9555	H2AFY	5q31.1	0.5047	7.96468	5.68227	8.84691e-06	0.000135545	2.92297
5426	POLE	12q24.33	-1.02408	5.71119	-5.68186	8.85566e-06	0.000135545	3.18113
2820	GPD2	2q24.1	-0.564247	7.19358	-5.67736	8.95296e-06	0.000136827	2.98604
4176	MCM7	7q22.1	-0.780935	6.55587	-5.67535	8.99651e-06	0.000137285	2.99515
10360	NPM3	10q24.32	-0.885176	4.21622	-5.67384	9.02956e-06	0.000137582	3.4153
3189	HNRNPH3	10q21.3	-0.661345	7.17326	-5.66928	9.13001e-06	0.000138903	2.94338
10212	DDX39A	19p13.12	-0.776653	4.74848	-5.66846	9.14819e-06	0.00013897	3.31256
3094	HINT1	5q23.3	-0.799874	7.04678	-5.66683	9.18421e-06	0.000139308	2.96539
5496	PPM1G	2p23.3	0.60787	8.11394	5.66374	9.25349e-06	0.000140148	2.88401
10211	FLOT1	6p21.33	-0.627124	6.96777	-5.66268	9.27718e-06	0.000140296	2.98575
100128731	OST4	2p23.3	0.588837	7.00658	5.65789	9.38563e-06	0.000141555	2.96995
23705	CADM1	11q23.3	0.707554	5.57203	5.65777	9.38839e-06	0.000141555	3.19814
2771	GNAI2	3p21.31	0.525415	7.15998	5.65546	9.44098e-06	0.000142135	2.95207
11034	DSTN	20p12.1	0.534565	9.48349	5.64815	9.61009e-06	0.000144466	2.77337
118980	SFXN2	10q24.32	0.887408	4.91583	5.64587	9.66323e-06	0.000144993	3.13693
58473	PLEKHB1	11q13.4	1.14352	4.58538	5.64542	9.67385e-06	0.000144993	3.41758
64764	CREB3L2	7q33	-0.690573	7.12548	-5.6404	9.7925e-06	0.000146554	2.9057
573	BAG1	9p13.3	0.593506	6.45841	5.63852	9.83708e-06	0.000147003	2.95741
1001	CDH3	16q22.1	0.496395	8.16937	5.63633	9.88961e-06	0.00014757	2.8203
133746	JMY	5q14.1	-0.678065	5.56183	-5.63565	9.90588e-06	0.000147595	3.14104
3184	HNRNPD	4q21.22	0.644878	7.54206	5.63353	9.95711e-06	0.000148069	2.84888
7259	TSPYL1	6q22.1	0.503702	8.00889	5.63312	9.967e-06	0.000148069	2.81186
9050	PSTPIP2	18q21.1	1.00123	4.22945	5.63228	9.98734e-06	0.000148153	3.34222
390205	LRRC10B	11q12.2	1.35251	3.53452	5.62577	1.01464e-05	0.000150292	3.50624
2495	FTH1	11q12.3	-0.442522	11.6227	-5.62315	1.02111e-05	0.000151029	2.6099
3398	ID2	2p25.1	-0.740859	6.66448	-5.62186	1.02432e-05	0.000151282	2.98324
203197	TMEM268	9q32	-0.76909	5.44884	-5.60628	1.06384e-05	0.00015689	3.06636
10036	CHAF1A	19p13.3	-1.2169	3.879	-5.60399	1.06977e-05	0.000157534	3.33499
58516	SINHCAF	12p11.21	-0.632076	5.6494	-5.57844	1.13834e-05	0.000167387	2.92189
3491	CYR61	1p22.3	1.36678	5.19178	5.57234	1.15535e-05	0.000169514	3.16158
593	BCKDHA	19q13.2	-0.743436	5.94252	-5.57205	1.15616e-05	0.000169514	2.91217
23030	KDM4B	19p13.3	0.806413	5.4397	5.56529	1.17534e-05	0.000172076	2.95994
26020	LRP10	14q11.2	0.468648	8.35517	5.553	1.21104e-05	0.000177047	2.59773
3703	STT3A	11q24.2	-0.477948	7.76781	-5.54843	1.2246e-05	0.000178771	2.60006
124935	SLC43A2	17p13.3	1.06107	5.15987	5.54758	1.22713e-05	0.000178881	3.02896
7358	UGDH	4p14	0.851981	7.48971	5.53967	1.25099e-05	0.000182096	2.61828
9939	RBM8A	1q21.1	-0.495213	7.97341	-5.53512	1.26495e-05	0.000183863	2.55834
1478	CSTF2	Xq22.1	-0.728969	5.25722	-5.52542	1.29522e-05	0.000187992	2.87843
116028	RMI2	16p13.13	-0.993757	4.31104	-5.52438	1.2985e-05	0.000188198	3.0261
54903	MKS1	17q22	-0.711669	5.12278	-5.5155	1.32689e-05	0.000192038	2.91408
11231	SEC63	6q21	-0.446405	7.608	-5.51314	1.33455e-05	0.000192869	2.52913
51499	TRIAP1	12q24.31	0.792716	5.20136	5.51215	1.33778e-05	0.000193061	2.88916
7108	TM7SF2	11q13.1	0.699688	6.77549	5.5032	1.36731e-05	0.00019704	2.66102
79586	CHPF	2q35	0.700761	7.27215	5.49574	1.39243e-05	0.000200375	2.52255
25984	KRT23	17q21.2	-1.32524	3.35656	-5.49248	1.40354e-05	0.000201687	3.18315
6223	RPS19	19q13.2	0.487358	9.68192	5.48663	1.4237e-05	0.000204293	2.35154
55061	SUSD4	1q41	0.747749	4.79621	5.48395	1.43304e-05	0.000205342	2.81231
1628	DBP	19q13.33	-0.890478	5.3767	-5.47317	1.47128e-05	0.000210523	2.82207
83990	BRIP1	17q23.2	-0.847337	6.77752	-5.46454	1.50261e-05	0.000214701	2.44339
1263	PLK3	1p34.1	1.23015	4.03898	5.45939	1.52163e-05	0.000216816	3.01204
282991	BLOC1S2	10q24.31	0.787767	5.68085	5.45937	1.5217e-05	0.000216816	2.64784
6388	SDF2	17q11.2	0.775679	5.73046	5.45593	1.53456e-05	0.000218339	2.6866
471	ATIC	2q35	-0.441087	8.06507	-5.45493	1.5383e-05	0.000218437	2.35599
57804	POLD4	11q13.2	0.685893	6.38972	5.45459	1.53957e-05	0.000218437	2.55606
23199	GSE1	16q24.1	-0.428002	9.63929	-5.44988	1.55737e-05	0.000220653	2.27034
10287	RGS19	20q13.33	1.23308	4.27356	5.44911	1.56032e-05	0.000220761	2.97993
84187	TMEM164	Xq23	0.534754	6.43952	5.44566	1.57354e-05	0.000222321	2.4531
55796	MBNL3	Xq26.2	-1.09605	4.73028	-5.44506	1.57583e-05	0.000222332	2.90383
26355	FAM162A	3q21.1	0.754775	5.7364	5.43908	1.59905e-05	0.000225294	2.61058
63922	CHTF18	16p13.3	-1.06467	5.11192	-5.43492	1.61537e-05	0.000227277	2.70612
10474	TADA3	3p25.3	-0.500451	7.50352	-5.43331	1.62177e-05	0.000227859	2.37007
10745	PHTF1	1p13.2	0.562347	6.14765	5.42921	1.63812e-05	0.000229837	2.50896
273	AMPH	7p14.1	2.7048	2.7802	5.41442	1.69842e-05	0.000237967	3.04826
11104	KATNA1	6q25.1	-1.05864	4.38221	-5.41203	1.7084e-05	0.000239034	2.83764
27235	COQ2	4q21.22-q21.23	-0.964448	3.86604	-5.41015	1.71628e-05	0.000239804	2.89327
144501	KRT80	12q13.13	0.483717	8.10296	5.40487	1.73859e-05	0.000242587	2.27552
533	ATP6V0B	1p34.1	0.663916	6.72787	5.40021	1.75856e-05	0.000244711	2.38542
3897	L1CAM	Xq28	0.688356	6.70919	5.40018	1.75866e-05	0.000244711	2.4912
1106	CHD2	15q26.1	-0.570377	8.09188	-5.39635	1.77522e-05	0.000246675	2.22485
3613	IMPA2	18p11.21	-0.700166	5.42051	-5.39477	1.7821e-05	0.00024729	2.53125
84236	RHBDD1	2q36.3	-0.828068	4.72758	-5.39003	1.80289e-05	0.000249833	2.66109
2175	FANCA	16q24.3	-1.13852	4.40455	-5.38777	1.81294e-05	0.000250881	2.71687
91445	RNF185	22q12.2	-0.635211	6.24953	-5.38597	1.8209e-05	0.000251639	2.39873
48	ACO1	9p21.1	0.650958	5.95123	5.38411	1.82923e-05	0.000252444	2.45366
4070	TACSTD2	1p32.1	0.553635	8.78691	5.38114	1.84261e-05	0.000253871	2.16159
3300	DNAJB2	2q35	0.666843	6.32747	5.3807	1.8446e-05	0.000253871	2.40956
84319	CMSS1	3q12.1	-1.0408	3.96327	-5.37652	1.86354e-05	0.000256129	2.67173
344595	DUBR	3q13.12	1.7285	3.42165	5.3659	1.91269e-05	0.000262526	2.94415
10635	RAD51AP1	12p13.32	-1.95109	1.4557	-5.36524	1.91579e-05	0.000262596	2.94375
55157	DARS2	1q25.1	-0.556233	6.83077	-5.36333	1.92475e-05	0.000263467	2.2041
2683	B4GALT1	9p21.1	-0.596366	7.12673	-5.36052	1.93805e-05	0.000264929	2.23518
85236	HIST1H2BK	6p22.1	-0.6988	6.95158	-5.35952	1.94282e-05	0.000265221	2.23864
2296	FOXC1	6p25.3	1.04234	3.93625	5.35533	1.96286e-05	0.000267596	2.70704
57650	CIP2A	3q13.13	-1.25354	3.60829	-5.35108	1.98342e-05	0.000270033	2.77445
4913	NTHL1	16p13.3	-0.806154	4.61128	-5.3481	1.99795e-05	0.000271646	2.60777
55254	TMEM39A	3q13.33	-0.791964	5.53149	-5.34316	2.02231e-05	0.000274588	2.3963
7534	YWHAZ	8q22.3	0.396874	10.792	5.3381	2.04755e-05	0.000277643	1.9424
55361	PI4K2A	10q24.2	0.669932	5.4934	5.33337	2.07147e-05	0.00028051	2.4044
1793	DOCK1	10q26.2	0.674952	6.13994	5.33226	2.07712e-05	0.000280897	2.27422
134492	NUDCD2	5q34	-0.998068	4.01421	-5.32947	2.09135e-05	0.000282443	2.64955
3006	HIST1H1C	6p22.2	0.627027	6.5882	5.32368	2.12128e-05	0.000286103	2.23816
1303	COL12A1	6q13-q14.1	0.91802	8.81745	5.32226	2.12867e-05	0.000286371	1.94402
3141	HLCS	21q22.13	-0.656357	5.45853	-5.32171	2.13154e-05	0.000286371	2.36753
440465	BAIAP2-DT	17q25.3	0.775337	5.32319	5.32167	2.13177e-05	0.000286371	2.44256
6513	SLC2A1	1p34.2	0.738351	6.16715	5.31446	2.16983e-05	0.000291097	2.1987
9401	RECQL4	8q24.3	-1.07737	4.45317	-5.30498	2.22091e-05	0.000297372	2.45771
146956	EME1	17q21.33	-2.1328	1.3767	-5.30469	2.22249e-05	0.000297372	2.79755
1647	GADD45A	1p31.3	0.884645	4.71631	5.30338	2.22964e-05	0.000297935	2.43528
11043	MID2	Xq22.3	0.671207	6.56258	5.30016	2.24736e-05	0.000299527	2.17247
55345	ZGRF1	4q25	-1.78781	2.33697	-5.2998	2.24932e-05	0.000299527	2.78693
51377	UCHL5	1q31.2	-0.613682	5.64371	-5.2996	2.25046e-05	0.000299527	2.23682
28988	DBNL	7p13	0.604599	6.02813	5.29764	2.2613e-05	0.000300574	2.22569
64710	NUCKS1	1q32.1	-0.570869	9.60919	-5.29648	2.26773e-05	0.000301033	1.88552
801	CALM1	14q32.11	0.426391	8.46122	5.2949	2.27654e-05	0.000301806	1.94234
4715	NDUFB9	8q24.13	-0.496877	7.78318	-5.29096	2.29869e-05	0.000303972	1.96837
84309	NUDT16L1	16p13.3	0.770384	5.34465	5.29092	2.29889e-05	0.000303972	2.36189
6533	SLC6A6	3p25.1	0.573685	7.07154	5.28653	2.32386e-05	0.000306572	2.05222
132320	SCLT1	4q28.2	-1.63857	2.16548	-5.28639	2.32463e-05	0.000306572	2.76148
7227	TRPS1	8q23.3	-0.474081	7.55282	-5.28267	2.346e-05	0.000308987	1.98464
22864	R3HDM2	12q13.3	-0.629339	6.88932	-5.26984	2.42112e-05	0.000318466	2.03629
345079	SOWAHB	4q21.1	1.06768	4.6248	5.26612	2.44337e-05	0.000320974	2.54691
23541	SEC14L2	22q12.2	1.18261	3.0354	5.26438	2.45381e-05	0.000321927	2.63908
51646	YPEL5	2p23.1	0.560888	7.05046	5.26095	2.47459e-05	0.000324097	2.02341
22929	SEPHS1	10p13	-0.514987	6.88473	-5.26059	2.47677e-05	0.000324097	1.97802
10513	APPBP2	17q23.2	0.438553	10.2668	5.24832	2.55261e-05	0.000333183	1.7487
5037	PEBP1	12q24.23	0.462848	8.94015	5.24829	2.55279e-05	0.000333183	1.80995
147798	TMC4	19q13.42	0.626112	7.07089	5.24409	2.5793e-05	0.000336208	1.97707
10220	GDF11	12q13.2	0.818664	5.06005	5.24086	2.5999e-05	0.000338456	2.25069
1318	SLC31A2	9q32	1.15853	4.07938	5.2399	2.60602e-05	0.000338816	2.5605
8438	RAD54L	1p34.1	-1.27663	2.0864	-5.23251	2.65387e-05	0.000344594	2.57824
84833	ATP5MD	10q24.33	0.662794	5.53041	5.23094	2.6641e-05	0.000345479	2.14392
367	AR	Xq12	0.522129	7.18051	5.2239	2.71069e-05	0.00035107	1.88732
50937	CDON	11q24.2	-1.251	3.84824	-5.21786	2.75125e-05	0.000355128	2.47554
22931	RAB18	10p12.1	0.596765	6.94331	5.21751	2.75364e-05	0.000355128	1.89742
57568	SIPA1L2	1q42.2	-0.909599	4.8075	-5.21749	2.75377e-05	0.000355128	2.21695
10094	ARPC3	12q24.11	0.533894	8.77958	5.21715	2.75609e-05	0.000355128	1.73898
54477	PLEKHA5	12p12.3	-0.680936	6.06151	-5.20848	2.81551e-05	0.000362323	2.0252
8125	ANP32A	15q23	-0.478526	7.48612	-5.20137	2.86522e-05	0.00036825	1.77326
4147	MATN2	8q22.1-q22.2	1.10312	5.98128	5.19976	2.87664e-05	0.000369247	2.11704
11331	PHB2	12p13.31	-0.449862	7.54408	-5.19315	2.92384e-05	0.00037483	1.74905
122953	JDP2	14q24.3	-1.1703	3.70919	-5.18974	2.94848e-05	0.00037751	2.40111
5155	PDGFB	22q13.1	0.613735	6.55211	5.17383	3.06632e-05	0.0003921	1.83191
54741	LEPROT	1p31.3	0.635058	6.34533	5.16972	3.09752e-05	0.000395247	1.87829
9448	MAP4K4	2q11.2	0.578076	6.92825	5.16956	3.09875e-05	0.000395247	1.79333
154810	AMOTL1	11q21	0.687543	4.78029	5.16862	3.10595e-05	0.000395666	2.02726
7184	HSP90B1	12q23.3	-0.382891	11.0949	-5.16641	3.12291e-05	0.000397325	1.49326
11051	NUDT21	16q13	-0.654018	7.35305	-5.15127	3.24169e-05	0.000411701	1.66407
55144	LRRC8D	1p22.2	-0.78827	5.09989	-5.15097	3.24405e-05	0.000411701	1.99254
54828	BCAS3	17q23.2	0.428696	9.75899	5.14977	3.25371e-05	0.000412409	1.54352
8545	CGGBP1	3p11.1	-0.754987	6.842	-5.14901	3.25974e-05	0.000412656	1.7371
84798	C19orf48	19q13.33	-0.545675	6.31398	-5.13944	3.33765e-05	0.000420451	1.73633
4801	NFYB	12q23.3	-0.70887	5.91952	-5.13937	3.33819e-05	0.000420451	1.89253
8727	CTNNAL1	9q31.3	-1.1795	3.59491	-5.13922	3.33943e-05	0.000420451	2.31077
171546	SPTSSA	14q13.1	-0.588142	6.4859	-5.13893	3.34185e-05	0.000420451	1.70519
55132	LARP1B	4q28.2	-0.646399	5.237	-5.13889	3.34213e-05	0.000420451	1.95113
63935	PCIF1	20q13.12	-0.670066	5.74393	-5.13755	3.35318e-05	0.000420528	1.87414
9702	CEP57	11q21	-1.02247	4.68342	-5.13742	3.35426e-05	0.000420528	2.0645
7515	XRCC1	19q13.31	-0.634108	5.53176	-5.13731	3.35523e-05	0.000420528	1.9293
8289	ARID1A	1p36.11	-0.495984	7.20637	-5.13147	3.40385e-05	0.000426093	1.65496
116987	AGAP1	2q37.2	-0.547677	6.4267	-5.12714	3.44041e-05	0.000430136	1.75824
338699	ANKRD42	11q14.1	0.730898	4.80926	5.11894	3.51073e-05	0.000438385	2.0083
54814	QPCTL	19q13.32	-0.885708	4.28874	-5.11762	3.52219e-05	0.000439273	2.10083
64225	ATL2	2p22.2-p22.1	-0.569729	6.17178	-5.1104	3.58552e-05	0.00044662	1.70614
112495	GTF3C6	6q21	0.687205	5.72049	5.10875	3.60012e-05	0.000447886	1.78243
116832	RPL39L	3q27.3	-1.2636	3.45261	-5.10256	3.65557e-05	0.000454226	2.20465
317648	NOP14-AS1	4p16.3	0.998046	4.31739	5.09833	3.69395e-05	0.000458179	2.14249
23347	SMCHD1	18p11.32	-0.538644	6.51584	-5.09806	3.69645e-05	0.000458179	1.64106
10592	SMC2	9q31.1	-1.02797	4.44038	-5.09296	3.74326e-05	0.000463412	1.93389
171019	ADAMTS19	5q23.3	1.02632	4.05323	5.08984	3.77218e-05	0.000466421	2.1208
1718	DHCR24	1p32.3	0.404008	9.25772	5.08445	3.82271e-05	0.00047209	1.39999
4851	NOTCH1	9q34.3	0.758655	5.40106	5.07742	3.8897e-05	0.000479777	1.79948
91768	CABLES1	18q11.2	-0.661346	6.00133	-5.07692	3.89451e-05	0.000479785	1.7344
1958	EGR1	5q31.2	1.10465	6.67877	5.07175	3.94454e-05	0.000485172	1.60594
83707	TRPT1	11q13.1	0.734981	5.73347	5.07141	3.94785e-05	0.000485172	1.74564
9580	SOX13	1q32.1	-0.508201	6.82438	-5.06774	3.98385e-05	0.000489001	1.55441
51175	TUBE1	6q21	-1.55472	2.58404	-5.06501	4.01076e-05	0.000491707	2.18828
8225	GTPBP6	Xp22.33	-0.571826	5.7853	-5.06315	4.02925e-05	0.000493375	1.68837
1774	DNASE1L1	Xq28	0.686473	5.7158	5.06113	4.04946e-05	0.00049525	1.67874
55168	MRPS18A	6p21.1	-0.645319	5.4278	-5.05391	4.12231e-05	0.00050355	1.69951
1471	CST3	20p11.21	0.602526	7.28443	5.04612	4.20248e-05	0.000512723	1.42679
23105	FSTL4	5q31.1	2.01246	2.74094	5.0443	4.22141e-05	0.000514411	2.18943
28996	HIPK2	7q34	0.504228	6.81983	5.04153	4.25043e-05	0.000517324	1.50874
387509	GPR153	1p36.31	1.61112	3.06647	5.03439	4.3261e-05	0.000525899	2.18084
26470	SEZ6L2	16p11.2	0.473229	8.1363	5.02874	4.38701e-05	0.000532663	1.31416
100507303	SNHG19	16p13.3	-0.724345	5.30169	-5.02706	4.40523e-05	0.000534233	1.68212
27131	SNX5	20p11.23	-0.47318	7.23021	-5.02538	4.42362e-05	0.000535821	1.35659
28970	C11orf54	11q21	-0.746798	5.33281	-5.01932	4.49039e-05	0.000543257	1.698
645	BLVRB	19q13.2	-0.539569	6.81027	-5.01879	4.49626e-05	0.000543316	1.3907
1997	ELF1	13q14.11	0.474018	7.52907	5.01824	4.50239e-05	0.000543407	1.30833
89765	RSPH1	21q22.3	0.84284	4.23713	5.01735	4.51227e-05	0.000543579	1.89718
51005	AMDHD2	16p13.3	0.850019	5.4123	5.01715	4.51458e-05	0.000543579	1.67966
22858	ICK	6p12.1	-0.688331	5.48092	-5.01376	4.55257e-05	0.0005475	1.59566
29798	C2orf27A	2q21.2	1.34191	2.93821	5.00765	4.62191e-05	0.000555179	2.08653
84267	C9orf64	9q21.32	-0.731705	4.7335	-5.00635	4.63675e-05	0.0005563	1.73551
84930	MASTL	10p12.1	-0.896475	4.61448	-5.00077	4.70118e-05	0.000563361	1.68241
9725	TMEM63A	1q42.12	0.648335	5.4827	4.99952	4.71578e-05	0.000564441	1.62786
9168	TMSB10	2p11.2	0.557186	9.67254	4.99705	4.74466e-05	0.000566928	1.14644
80321	CEP70	3q22.3	-0.775197	4.97284	-4.99679	4.74778e-05	0.000566928	1.62139
6890	TAP1	6p21.32	0.964608	4.01532	4.99611	4.75578e-05	0.000567212	1.88538
220441	RNF152	18q21.33	-1.21916	3.62333	-4.9955	4.7629e-05	0.000567392	1.93862
6746	SSR2	1q22	-0.434176	8.80823	-4.99336	4.78821e-05	0.000569736	1.17161
401152	C4orf3	4q26	0.557145	6.72728	4.98695	4.86481e-05	0.000578169	1.35348
124975	GGT6	17p13.2	1.53087	2.28159	4.98528	4.88496e-05	0.000579881	2.06624
81704	DOCK8	9p24.3	1.05371	4.24658	4.98386	4.90218e-05	0.000581242	1.8578
2195	FAT1	4q35.2	0.736812	6.69724	4.97759	4.97882e-05	0.000589638	1.36525
5205	ATP8B1	18q21.31	-0.648542	6.51137	-4.9758	5.00097e-05	0.000591567	1.35283
79960	JADE1	4q28.2	-0.951078	3.71438	-4.96131	5.18365e-05	0.000612459	1.79171
3608	ILF2	1q21.3	-0.433868	8.093	-4.95924	5.21029e-05	0.000614887	1.1185
672	BRCA1	17q21.31	-1.06156	3.50662	-4.95863	5.21814e-05	0.000615095	1.68677
11098	PRSS23	11q14.2	1.15656	3.72096	4.95707	5.23827e-05	0.000616748	1.82894
92675	DTD1	20p11.23	-0.584193	6.1987	-4.95388	5.27981e-05	0.000620915	1.35952
57496	MKL2	16p13.12	-0.560475	6.94938	-4.95308	5.29027e-05	0.000621422	1.2363
81624	DIAPH3	13q21.2	-1.19198	3.64604	-4.95004	5.33035e-05	0.000625403	1.84884
1643	DDB2	11p11.2	0.617627	6.20126	4.94893	5.34492e-05	0.000626385	1.28158
23659	PLA2G15	16q22.1	0.639146	5.33255	4.94621	5.38105e-05	0.000629888	1.50711
7436	VLDLR	9p24.2	-0.773368	4.80139	-4.93987	5.46634e-05	0.000639131	1.53535
54843	SYTL2	11q14.1	0.446545	9.47543	4.93871	5.482e-05	0.000640222	1.02779
10125	RASGRP1	15q14	1.31834	2.23126	4.93497	5.53302e-05	0.000645434	1.83023
653784	MZT2A	2q21.1	-0.712058	4.61366	-4.93274	5.56367e-05	0.000648261	1.5167
410	ARSA	22q13.33	0.929609	5.15406	4.93086	5.58971e-05	0.000650544	1.51351
5052	PRDX1	1p34.1	0.442806	9.61021	4.92994	5.60238e-05	0.000651269	0.972724
607	BCL9	1q21.2	0.487253	6.67089	4.92722	5.64028e-05	0.00065492	1.22572
10163	WASF2	1p36.11	-0.467274	7.60372	-4.92655	5.64965e-05	0.000655255	1.09868
79650	USB1	16q21	0.750826	5.1772	4.92285	5.70182e-05	0.000660548	1.46471
26504	CNNM4	2q11.2	-0.53884	6.7777	-4.92008	5.74097e-05	0.000664322	1.17221
4172	MCM3	6p12.2	-0.556138	6.95972	-4.91802	5.77035e-05	0.000666627	1.09121
79778	MICALL2	7p22.3	0.7268	6.14094	4.91742	5.77897e-05	0.000666627	1.2905
6872	TAF1	Xq13.1	-0.584221	6.84058	-4.9173	5.78069e-05	0.000666627	1.16491
7398	USP1	1p31.3	-0.644822	6.03072	-4.91446	5.82156e-05	0.000670574	1.25207
9771	RAPGEF5	7p15.3	-0.954524	3.29563	-4.91382	5.83079e-05	0.000670873	1.75906
145567	TTC7B	14q32.11	-0.805767	4.51622	-4.90779	5.91862e-05	0.000680203	1.58637
57122	NUP107	12q15	-0.546643	5.87624	-4.90066	6.02414e-05	0.000690873	1.21038
10735	STAG2	Xq25	-0.52257	7.75676	-4.90059	6.02513e-05	0.000690873	1.02079
221092	HNRNPUL2	11q12.3	-0.579964	6.1795	-4.89925	6.04521e-05	0.000692389	1.20952
11313	LYPLA2	1p36.11	0.692895	5.76417	4.89594	6.09504e-05	0.000697305	1.31147
5888	RAD51	15q15.1	-1.36675	2.33248	-4.89248	6.14753e-05	0.000702515	1.78971
144811	LACC1	13q14.11	1.05369	3.88039	4.89174	6.1589e-05	0.00070302	1.67389
116441	TM4SF18	3q25.1	2.01336	3.31016	4.89111	6.1685e-05	0.00070332	1.85483
5820	PVT1	8q24.21	0.703296	4.6093	4.88803	6.21581e-05	0.000707915	1.42119
81603	TRIM8	10q24.32	0.622984	6.51178	4.88523	6.25914e-05	0.000711575	1.16853
5424	POLD1	19q13.33	-0.966936	4.24151	-4.88504	6.26203e-05	0.000711575	1.49876
3839	KPNA3	13q14.2	0.55008	5.85596	4.88449	6.27064e-05	0.000711752	1.24327
57418	WDR18	19p13.3	-1.06329	4.39005	-4.88355	6.28525e-05	0.000712611	1.53743
6293	VPS52	6p21.32	-0.506437	6.38178	-4.8829	6.29543e-05	0.000712646	1.14279
22924	MAPRE3	2p23.3	0.790177	4.68778	4.88262	6.29967e-05	0.000712646	1.48237
1345	COX6C	8q22.2	0.441097	8.67797	4.87343	6.44501e-05	0.000728272	0.866654
57050	UTP3	4q13.3	0.63373	5.80803	4.87064	6.48969e-05	0.000732502	1.18603
55196	KIAA1551	12p11.21	-0.687621	5.11036	-4.86623	6.56103e-05	0.000739727	1.30448
10247	RIDA	8q22.2	0.658626	5.221	4.86539	6.57478e-05	0.000740451	1.28736
51651	PTRH2	17q23.1	0.525501	5.74768	4.85653	6.72099e-05	0.000754943	1.13563
54069	MIS18A	21q22.11	-0.90926	4.02057	-4.85648	6.72171e-05	0.000754943	1.45258
23424	TDRD7	9q22.33	0.781341	4.49449	4.85623	6.72588e-05	0.000754943	1.45068
22901	ARSG	17q24.2	-0.795229	4.92159	-4.85503	6.74604e-05	0.000756365	1.37231
84277	DNAJC30	7q11.23	0.975205	4.10381	4.85347	6.77218e-05	0.000758455	1.56359
4947	OAZ2	15q22.31	0.488222	6.67408	4.85272	6.7848e-05	0.000759026	1.01433
23354	HAUS5	19q13.12	-0.951212	3.8965	-4.85145	6.8061e-05	0.000760566	1.53382
10087	COL4A3BP	5q13.3	-0.629513	5.77188	-4.84959	6.83764e-05	0.000763246	1.19357
51659	GINS2	16q24.1	-1.04826	4.46719	-4.84797	6.86517e-05	0.000765473	1.27752
90390	MED30	8q24.11	-1.32408	2.88943	-4.84508	6.91461e-05	0.000770136	1.69582
55729	ATF7IP	12p13.1	-0.701023	5.96433	-4.84429	6.92818e-05	0.000770798	1.12154
130814	PQLC3	2p25.1	0.648009	5.91363	4.84209	6.96615e-05	0.00077417	1.13734
11273	ATXN2L	16p11.2	-0.484113	7.66656	-4.83961	7.00911e-05	0.000778088	0.871595
254427	PROSER2	10p14	-0.811033	4.34391	-4.83917	7.01681e-05	0.000778088	1.3843
10606	PAICS	4q12	-0.402339	8.06148	-4.83872	7.02461e-05	0.000778098	0.810785
5770	PTPN1	20q13.13	0.403286	7.81391	4.83766	7.04307e-05	0.000779289	0.838829
4925	NUCB2	11p15.1	-0.498779	9.18458	-4.83376	7.11161e-05	0.000786012	0.752691
1627	DBN1	5q35.3	0.665365	6.63842	4.83124	7.15618e-05	0.000790074	1.00934
64834	ELOVL1	1p34.2	0.529131	6.27176	4.83004	7.17749e-05	0.000791562	1.04065
283551	LINC01588	14q21.3	1.61901	2.35115	4.82778	7.21787e-05	0.000795146	1.68627
283335	LOC283335	12q13.13	0.863186	4.72018	4.82221	7.31849e-05	0.000805352	1.30462
123811	FOPNL	16p13.11	-0.656177	5.89246	-4.82166	7.32838e-05	0.000805564	1.05005
5889	RAD51C	17q22	-0.507092	7.30322	-4.81839	7.3882e-05	0.000811256	0.822761
8904	CPNE1	20q11.22	-0.46115	6.95013	-4.8168	7.41734e-05	0.000812745	0.887949
84924	ZNF566	19q13.12	-1.38273	2.80053	-4.81678	7.41784e-05	0.000812745	1.64695
57597	BAHCC1	17q25.3	-0.816386	4.6345	-4.81617	7.42897e-05	0.000813082	1.39372
149473	CCDC24	1p34.1	1.00925	3.84659	4.81525	7.44608e-05	0.000814072	1.47469
283848	CES4A	16q22.1	1.07979	4.81487	4.80869	7.5683e-05	0.00082654	1.35431
55240	STEAP3	2q14.2	0.673574	5.35131	4.80605	7.61812e-05	0.000831083	1.13088
3159	HMGA1	6p21.31	-0.458075	7.45096	-4.80271	7.68154e-05	0.000837097	0.789448
79718	TBL1XR1	3q26.32	-0.570624	6.38359	-4.80188	7.69739e-05	0.000837921	0.921641
1889	ECE1	1p36.12	0.496609	8.09614	4.79933	7.74623e-05	0.000842329	0.741668
8884	SLC5A6	2p23.3	0.433681	7.27949	4.79275	7.87394e-05	0.000855296	0.826721
23516	SLC39A14	8p21.3	-0.580533	5.72171	-4.78737	7.9797e-05	0.000865853	0.986837
3030	HADHA	2p23.3	-0.402283	8.91557	-4.78007	8.12572e-05	0.000880751	0.639275
50848	F11R	1q23.3	0.36968	8.86867	4.77937	8.13999e-05	0.000881352	0.647434
113026	PLCD3	17q21.31	0.701828	5.09179	4.77769	8.17403e-05	0.000884091	1.12124
10544	PROCR	20q11.22	1.52837	2.18404	4.7767	8.19414e-05	0.000885318	1.57244
3716	JAK1	1p31.3	0.588943	8.12699	4.77479	8.23315e-05	0.000888122	0.664012
3303	HSPA1A	6p21.33	0.759259	7.23145	4.77456	8.23768e-05	0.000888122	0.809647
5899	RALB	2q14.2	0.452807	7.0249	4.77329	8.2638e-05	0.000889988	0.789054
7494	XBP1	22q12.1	0.559128	11.1254	4.77044	8.32246e-05	0.000895352	0.503777
11320	MGAT4A	2q11.2	0.637856	7.47506	4.76924	8.34741e-05	0.00089708	0.771661
10749	KIF1C	17p13.2	0.464603	7.04424	4.76443	8.44763e-05	0.000906886	0.775724
51143	DYNC1LI1	3p22.3	-0.64701	5.52009	-4.7616	8.50725e-05	0.000912317	1.02046
372	ARCN1	11q23.3	-0.386017	8.88917	-4.75331	8.68447e-05	0.000930334	0.571071
57558	USP35	11q14.1	0.854917	4.04359	4.75178	8.71738e-05	0.000932871	1.19724
442075	EMC3-AS1	3p25.3	-1.63599	2.55748	-4.74977	8.76122e-05	0.00093657	1.50756
79745	CLIP4	2p23.2	3.19887	2.17057	4.74497	8.86625e-05	0.000946796	1.34151
5261	PHKG2	16p11.2	0.703484	5.70888	4.74211	8.92957e-05	0.00095255	0.935938
6675	UAP1	1q23.3	-0.588418	6.34183	-4.74109	8.9521e-05	0.000953946	0.78681
996	CDC27	17q21.32	-0.519689	6.09346	-4.73997	8.97716e-05	0.00095516	0.802497
4144	MAT2A	2p11.2	-0.529072	8.08472	-4.73921	8.99404e-05	0.00095516	0.58226
9112	MTA1	14q32.33	-0.500442	6.58854	-4.73878	9.00378e-05	0.00095516	0.752133
8089	YEATS4	12q15	-0.907655	4.06427	-4.73875	9.00448e-05	0.00095516	1.26274
4325	MMP16	8q21.3	0.670507	5.75102	4.73846	9.01076e-05	0.00095516	0.972371
55632	G2E3	14q12	-0.860273	4.04212	-4.73741	9.03431e-05	0.000956652	1.19904
7077	TIMP2	17q25.3	0.454716	7.14914	4.73469	9.0956e-05	0.000962134	0.68516
27018	BEX3	Xq22.2	0.629799	6.30273	4.73029	9.19582e-05	0.000971556	0.767384
28960	DCPS	11q24.2	-0.876164	3.86407	-4.72993	9.20391e-05	0.000971556	1.20024
64689	GORASP1	3p22.2	0.550451	6.03022	4.72884	9.22891e-05	0.000973178	0.842913
498	ATP5F1A	18q21.1	0.370039	8.79178	4.72799	9.24837e-05	0.000974213	0.516098
6119	RPA3	7p21.3	-0.899487	4.60214	-4.7237	9.34765e-05	0.000983646	1.02497
121457	IKBIP	12q23.1	1.01438	4.07983	4.72122	9.40529e-05	0.00098796	1.13922
91057	CCDC34	11p14.1	-1.04754	3.44776	-4.7211	9.40821e-05	0.00098796	1.22844
2794	GNL1	6p21.33	-0.561605	6.24503	-4.71911	9.45477e-05	0.000991818	0.743638
144404	TMEM120B	12q24.31	1.05309	4.27555	4.71377	9.58128e-05	0.00100405	1.10665
5066	PAM	5q21.1	0.507448	6.99051	4.71176	9.62923e-05	0.00100793	0.624377
10092	ARPC5	1q25.3	0.549145	6.70057	4.71138	9.63826e-05	0.00100793	0.675494
9601	PDIA4	7q36.1	-0.380824	9.00788	-4.70713	9.7408e-05	0.0010176	0.441363
2948	GSTM4	1p13.3	0.511063	6.41707	4.70489	9.79503e-05	0.0010222	0.756459
4267	CD99	Xp22.33	-0.393454	7.79557	-4.6972	9.9841e-05	0.00104086	0.487627
1465	CSRP1	1q32.1	0.52435	8.25978	4.69513	0.000100357	0.00104516	0.494158
7994	KAT6A	8p11.21	-0.612604	5.81037	-4.68881	0.000101947	0.00105994	0.765059
10960	LMAN2	5q35.3	-0.395677	7.94649	-4.68865	0.000101986	0.00105994	0.464677
51122	COMMD2	3q25.1	-0.598388	5.4392	-4.6867	0.000102484	0.00106402	0.816943
51538	ZCCHC17	1p35.2	0.606862	5.63218	4.68566	0.00010275	0.00106569	0.75184
9181	ARHGEF2	1q22	-0.85099	4.4421	-4.67885	0.000104504	0.00108277	0.945736
283219	KCTD21	11q14.1	0.702991	5.0028	4.67799	0.000104727	0.00108329	0.879993
8073	PTP4A2	1p35.2	-0.462603	9.18298	-4.67783	0.000104769	0.00108329	0.373412
1781	DYNC1I2	2q31.1	0.487849	6.57805	4.67461	0.000105613	0.0010909	0.596088
59084	ENPP5	6p21.1	1.05157	3.90476	4.67079	0.000106619	0.00110017	1.10443
56949	XAB2	19p13.2	-0.66545	5.40877	-4.66925	0.00010703	0.00110328	0.805503
3983	ABLIM1	10q25.3	-0.483512	6.45308	-4.66408	0.000108414	0.00111641	0.576221
10654	PMVK	1q21.3	-0.60787	5.44234	-4.6634	0.000108599	0.00111718	0.758699
283377	SPRYD4	12q13.3	0.916674	4.35739	4.66038	0.000109417	0.00112445	1.01035
1031	CDKN2C	1p32.3	-1.5327	2.5064	-4.65377	0.00011123	0.00114192	1.27649
22836	RHOBTB3	5q15	0.605098	9.03466	4.65301	0.000111442	0.00114294	0.304262
105370098	NA	NA	-1.10921	3.36365	-4.65215	0.000111681	0.00114422	1.1108
10598	AHSA1	14q24.3	0.476422	6.5311	4.65078	0.000112061	0.00114695	0.517081
10576	CCT2	12q15	0.372469	8.13074	4.64299	0.000114254	0.00116821	0.335208
10600	USP16	21q21.3	-0.583816	6.04992	-4.6421	0.000114507	0.00116961	0.606199
22821	RASA3	13q34	0.718762	4.4298	4.64138	0.000114713	0.00117054	0.889929
130340	AP1S3	2q36.1	1.23473	3.18536	4.63455	0.000116678	0.00118939	1.1298
284161	GDPD1	17q22	-0.940104	4.69061	-4.63414	0.000116797	0.0011894	0.917077
10054	UBA2	19q13.11	-0.435881	7.18167	-4.63263	0.000117238	0.00119269	0.390778
10367	MICU1	10q22.1	-0.506697	6.17126	-4.62897	0.00011831	0.00120202	0.55557
339044	PKD1P1	16p13.11	-0.874996	4.69815	-4.62869	0.000118393	0.00120202	0.860745
4637	MYL6	12q13.2	0.430612	9.48338	4.62574	0.000119265	0.00120965	0.236426
5836	PYGL	14q22.1	1.00473	3.99911	4.62521	0.000119423	0.00121004	1.02848
840	CASP7	10q25.3	0.602985	5.66121	4.62124	0.000120608	0.00122082	0.629617
23074	UHRF1BP1L	12q23.1	-0.695982	5.20642	-4.62049	0.000120833	0.00122188	0.727331
10241	CALCOCO2	17q21.32	-0.417682	7.41811	-4.61995	0.000120995	0.00122229	0.345921
84928	TMEM209	7q32.2	-0.7799	4.55312	-4.6168	0.000121947	0.00123067	0.79486
9611	NCOR1	17p12-p11.2	-0.539056	7.01738	-4.61583	0.000122242	0.00123242	0.397048
9184	BUB3	10q26.13	-0.565983	7.5137	-4.61203	0.000123403	0.00124289	0.300007
219790	RTKN2	10q21.2	-1.67028	2.07005	-4.60678	0.000125026	0.00125798	1.19124
4126	MANBA	4q24	0.562527	6.25771	4.60306	0.000126189	0.00126842	0.520508
284018	C17orf58	17q24.2	-0.573837	6.36758	-4.60199	0.000126526	0.00126948	0.45949
8692	HYAL2	3p21.31	0.949399	4.23102	4.60193	0.000126545	0.00126948	0.847891
1869	E2F1	20q11.22	-1.08426	3.42705	-4.59823	0.000127715	0.00127994	0.856353
8503	PIK3R3	1p34.1	0.528677	7.49304	4.59685	0.000128155	0.00128307	0.302468
83442	SH3BGRL3	1p36.11	0.568985	6.71649	4.59421	0.000129	0.00129026	0.358754
25837	RAB26	16p13.3	0.885583	6.04131	4.59373	0.000129155	0.00129052	0.568232
9612	NCOR2	12q24.31	-0.56888	7.55334	-4.59329	0.000129296	0.00129066	0.303422
5933	RBL1	20q11.23	-0.906849	3.97492	-4.59138	0.000129912	0.00129553	0.803986
51765	STK26	Xq26.2	0.471651	7.39605	4.59043	0.000130218	0.0012973	0.23657
5166	PDK4	7q21.3	-1.0378	4.13888	-4.58692	0.000131362	0.0013074	0.956297
84869	CBR4	4q32.3	-0.634972	4.87743	-4.58375	0.000132402	0.00131646	0.655529
286	ANK1	8p11.21	2.21139	2.84662	4.58167	0.000133089	0.00132199	1.14767
2879	GPX4	19p13.3	-0.632075	5.68768	-4.57972	0.000133736	0.00132712	0.48457
9818	NUP58	13q12.13	-0.682399	5.38348	-4.57841	0.000134173	0.00133014	0.544656
8942	KYNU	2q22.2	0.491458	8.13776	4.57746	0.000134491	0.00133166	0.204828
307	ANXA4	2p13.3	0.463581	6.95519	4.57682	0.000134705	0.00133166	0.294723
10437	IFI30	19p13.11	0.652609	6.63009	4.57677	0.000134722	0.00133166	0.34749
29767	TMOD2	15q21.2	1.13728	3.99458	4.57463	0.000135443	0.00133748	0.962451
3337	DNAJB1	19p13.12	0.518917	6.8911	4.57137	0.000136545	0.00134704	0.320011
3320	HSP90AA1	14q32.31	0.418676	10.3299	4.57013	0.000136968	0.0013499	0.0528294
388	RHOB	2p24.1	0.468353	8.89105	4.56973	0.000137103	0.00134992	0.136946
5725	PTBP1	19p13.3	-0.404834	8.04186	-4.5669	0.000138075	0.00135817	0.161628
54492	NEURL1B	5q35.1	-0.786093	4.71365	-4.56258	0.000139567	0.00137151	0.61345
60598	KCNK15	20q13.12	0.671058	4.28415	4.56034	0.000140347	0.00137783	0.577155
10728	PTGES3	12q13.3	-0.424388	8.46729	-4.55983	0.000140526	0.00137825	0.108832
9054	NFS1	20q11.22	0.58014	5.63781	4.55732	0.000141407	0.00138533	0.481436
55737	VPS35	16q11.2	-0.454559	7.47558	-4.55699	0.000141523	0.00138533	0.179793
8612	PLPP2	19p13.3	0.652762	5.97244	4.55356	0.000142736	0.00139586	0.448387
6391	SDHC	1q23.3	0.392931	7.17425	4.55289	0.000142974	0.00139683	0.218327
675	BRCA2	13q13.1	-1.23026	2.2589	-4.55182	0.000143356	0.00139878	1.00001
6314	ATXN7	3p14.1	-0.478192	6.84905	-4.55156	0.00014345	0.00139878	0.253846
22824	HSPA4L	4q28.1	0.834167	4.5291	4.55064	0.000143776	0.0014006	0.582703
222171	PRR15	7p14.3	-0.662081	4.80104	-4.54775	0.000144816	0.00140912	0.630394
23287	AGTPBP1	9q21.33	-0.959736	4.16478	-4.54744	0.000144929	0.00140912	0.742364
6324	SCN1B	19q13.11	1.16057	4.10388	4.54597	0.000145461	0.00141293	0.928429
54858	PGPEP1	19p13.11	0.672686	4.96358	4.54346	0.00014637	0.00142039	0.588055
3987	LIMS1	2q12.3	-0.645278	5.31903	-4.53759	0.000148525	0.00143993	0.465767
2799	GNS	12q14.3	0.398244	8.80248	4.53673	0.000148843	0.00144162	0.0487345
79047	KCTD15	19q13.11	-0.61473	5.50959	-4.53141	0.000150827	0.00145944	0.423076
3927	LASP1	17q12	0.383964	8.18272	4.52929	0.000151626	0.00146487	0.0698548
6567	SLC16A2	Xq13.2	0.483304	6.55318	4.52915	0.000151678	0.00146487	0.276675
3304	HSPA1B	6p21.33	0.697744	6.02986	4.5263	0.000152759	0.0014739	0.377685
998	CDC42	1p36.12	0.424473	8.32361	4.51943	0.000155394	0.00149789	0.0328879
9130	FAM50A	Xq28	0.548588	7.34326	4.51786	0.000156002	0.00150232	0.123591
22862	FNDC3A	13q14.2	-0.5188	5.64301	-4.51183	0.000158366	0.00152343	0.289865
9052	GPRC5A	12p13.1	0.788253	5.85904	4.5115	0.000158496	0.00152343	0.37041
154007	SNRNP48	6p24.3	-0.819216	4.32872	-4.5069	0.00016032	0.0015395	0.632976
9703	KIAA0100	17q11.2	0.372248	8.23453	4.49864	0.000163652	0.00157	-0.0167991
7088	TLE1	9q21.32	-0.620376	7.25512	-4.4947	0.000165264	0.00158396	0.0899045
64359	NXN	17p13.3	0.791292	4.30377	4.49076	0.000166896	0.00159808	0.607509
23198	PSME4	2p16.2	0.45855	6.67673	4.48967	0.000167347	0.00160089	0.123364
9031	BAZ1B	7q11.23	-0.43255	7.22839	-4.48927	0.000167515	0.00160098	0.047177
3921	RPSA	3p22.1	-0.333634	9.57087	-4.48617	0.000168814	0.00161187	-0.13279
29964	PRICKLE4	6p21.1	1.32084	3.12428	4.48565	0.000169032	0.00161243	0.85549
220047	CCDC83	11q14.1-q14.2	1.29481	3.10277	4.48488	0.000169358	0.00161402	0.828933
6839	SUV39H1	Xp11.23	-0.899148	3.28888	-4.48097	0.000171015	0.00162827	0.672044
1020	CDK5	7q36.1	0.680488	4.97184	4.4787	0.000171984	0.00163595	0.405561
8933	RTL8C	Xq26.3	0.464923	7.03776	4.47688	0.000172764	0.00164182	0.045396
10961	ERP29	12q24.13	-0.418277	8.30349	-4.474	0.000174007	0.00165209	-0.0845806
55005	RMND1	6q25.1	-0.485434	7.88163	-4.47252	0.000174651	0.00165664	-0.0646744
84062	DTNBP1	6p22.3	0.715027	4.52813	4.47162	0.000175042	0.00165879	0.490575
950	SCARB2	4q21.1	-0.359	9.13349	-4.46971	0.000175878	0.00166421	-0.132402
9915	ARNT2	15q25.1	0.60826	7.63069	4.46956	0.000175943	0.00166421	0.0372762
23625	FAM89B	11q13.1	0.636987	6.06632	4.46846	0.000176424	0.0016672	0.20603
51608	GET4	7p22.3	0.625755	6.2259	4.46726	0.000176955	0.00167065	0.194729
84987	COX14	12q13.12	0.617729	5.33245	4.4643	0.000178262	0.00168142	0.300572
57555	NLGN2	17p13.1	0.689031	5.78428	4.46181	0.000179373	0.00169032	0.271107
57493	HEG1	3q21.2	1.02397	4.30912	4.45772	0.000181205	0.001706	0.54539
9538	EI24	11q24.2	0.443823	7.28464	4.4555	0.00018221	0.00171386	-0.0484055
54793	KCTD9	8p21.2	-0.63995	4.94625	-4.45425	0.000182781	0.00171763	0.284664
65055	REEP1	2p11.2	1.35109	2.86532	4.45	0.000184724	0.00173286	0.771782
5782	PTPN12	7q11.23	-0.463608	7.18283	-4.44996	0.000184745	0.00173286	-0.015463
50619	DEF6	6p21.31	-1.36268	2.12352	-4.43974	0.000189508	0.00177589	0.792297
1351	COX8A	11q13.1	-0.450789	7.67361	-4.43855	0.000190068	0.00177949	-0.13089
2004	ELK3	12q23.1	0.780126	5.06007	4.43442	0.000192033	0.00179622	0.305511
9169	SCAF11	12q12	0.44998	8.80665	4.43293	0.000192749	0.00180125	-0.204464
2621	GAS6	13q34	0.855501	4.63106	4.43047	0.000193933	0.00181012	0.438146
7410	VAV2	9q34.2	0.454358	7.09263	4.43021	0.000194057	0.00181012	-0.0603693
5935	RBM3	Xp11.23	-0.406677	8.12851	-4.42866	0.000194808	0.00181545	-0.190205
5902	RANBP1	22q11.21	-0.531876	6.23962	-4.42784	0.000195205	0.00181748	-0.0083022
22837	COBLL1	2q24.3	-0.69716	5.88034	-4.42469	0.000196742	0.0018301	0.117962
9868	TOMM70	3q12.2	-0.417848	7.24537	-4.41918	0.000199462	0.00185369	-0.14287
123096	SLC25A29	14q32.2	0.625282	6.15629	4.41879	0.000199655	0.00185379	0.0581792
790	CAD	2p23.3	-0.497451	6.52461	-4.41259	0.000202764	0.00188092	-0.0834005
6844	VAMP2	17p13.1	-0.515508	5.90879	-4.41205	0.000203034	0.0018817	0.0600642
53838	C11orf24	11q13.2	0.863345	4.56603	4.41119	0.000203469	0.001884	0.311303
5601	MAPK9	5q35.3	-0.448599	6.79078	-4.40985	0.000204149	0.00188856	-0.0781936
79921	TCEAL4	Xq22.2	0.460594	8.46064	4.40932	0.000204421	0.00188935	-0.258782
26058	GIGYF2	2q37.1	-0.438545	6.66282	-4.40861	0.000204781	0.00189095	-0.0652252
10420	TESK2	1p34.1	-0.709786	4.36556	-4.40819	0.000204995	0.0018912	0.372219
406991	MIR21	17q23.1	1.48844	3.77843	4.4063	0.000205964	0.00189841	0.683082
79677	SMC6	2p24.2	-0.646871	5.39064	-4.40077	0.000208822	0.00192299	0.123399
80146	UXS1	2q12.2	0.546826	5.49363	4.39646	0.000211072	0.00194194	0.0685463
55625	ZDHHC7	16q24.1	0.553911	7.87077	4.39419	0.000212271	0.00195119	-0.211684
8458	TTF2	1p13.1	-0.491813	6.06714	-4.39107	0.000213923	0.00196459	-0.127439
51114	ZDHHC9	Xq26.1	0.376946	6.98824	4.38972	0.000214646	0.00196944	-0.190904
8864	PER2	2q37.3	-0.714754	4.74475	-4.389	0.00021503	0.00197117	0.278779
51133	KCTD3	1q41	-0.415523	9.0979	-4.3838	0.000217833	0.00199506	-0.345397
84126	ATRIP	3p21.31	0.879248	3.72697	4.3807	0.00021952	0.00200869	0.400731
6240	RRM1	11p15.4	-0.603182	6.227	-4.37495	0.000222688	0.00203583	-0.138558
55170	PRMT6	1p13.3	0.360011	8.0027	4.37177	0.000224459	0.00204865	-0.325816
11190	CEP250	20q11.22	-0.633308	5.26858	-4.3717	0.000224496	0.00204865	0.0519203
2635	GBP3	1p22.2	1.50262	2.40494	4.3708	0.000225	0.0020514	0.632925
28992	MACROD1	11q13.1	-0.534186	5.92056	-4.36961	0.000225668	0.00205563	-0.072867
4082	MARCKS	6q21	-1.22194	3.7583	-4.36788	0.000226644	0.00206266	0.485538
900	CCNG1	5q34	0.787325	7.33103	4.36568	0.000227889	0.00207213	-0.260661
51706	CYB5R1	1q32.1	0.587212	7.01836	4.3651	0.00022822	0.00207221	-0.164537
9814	SFI1	22q12.2	-0.702841	5.47864	-4.36494	0.000228308	0.00207221	0.048383
79866	BORA	13q21.33	-1.56847	2.32972	-4.36391	0.000228897	0.00207569	0.615453
84460	ZMAT1	Xq22.1	0.869138	4.96344	4.3626	0.000229644	0.00208059	0.213661
2618	GART	21q22.11	-0.433032	6.43179	-4.36149	0.000230276	0.00208446	-0.223035
11099	PTPN21	14q31.3	0.882613	4.69328	4.36025	0.00023099	0.00208904	0.287393
9230	RAB11B	19p13.2	-0.55328	5.78974	-4.35887	0.000231783	0.00209387	-0.0196871
55733	HHAT	1q32.2	0.986059	4.29634	4.35861	0.000231939	0.00209387	0.271397
50809	HP1BP3	1p36.12	-0.368549	8.01053	-4.35594	0.000233484	0.00210595	-0.356263
3280	HES1	3q29	0.652842	6.96476	4.35508	0.000233985	0.00210858	-0.213398
80232	WDR26	1q42.11-q42.12	0.392282	7.78714	4.35352	0.000234895	0.00211319	-0.336699
3956	LGALS1	22q13.1	-1.16996	3.09741	-4.35349	0.000234915	0.00211319	0.426618
3597	IL13RA1	Xq24	0.388632	7.68674	4.35217	0.000235687	0.00211825	-0.324909
2926	GRSF1	4q13.3	0.429882	7.46947	4.34994	0.000236996	0.00212812	-0.31781
522	ATP5PF	21q21.3	0.595744	6.54073	4.34937	0.000237334	0.00212926	-0.203687
29095	ORMDL2	12q13.2	0.710241	4.51831	4.34587	0.000239412	0.00214413	0.187708
51129	ANGPTL4	19p13.2	-0.92463	4.83829	-4.34586	0.000239416	0.00214413	0.214239
10672	GNA13	17q24.1	-0.453046	7.41658	-4.34249	0.000241436	0.0021603	-0.343813
10902	BRD8	5q31.2	-0.434295	6.37882	-4.33979	0.000243065	0.00217295	-0.207906
10400	PEMT	17p11.2	-0.971252	3.33796	-4.33766	0.000244355	0.00218255	0.397476
85442	KNDC1	10q26.3	-1.19334	3.71115	-4.33625	0.000245215	0.00218831	0.387332
55536	CDCA7L	7p15.3	-1.16502	2.96935	-4.33445	0.000246319	0.00219622	0.413401
8527	DGKD	2q37.1	-0.514918	6.14466	-4.33383	0.000246699	0.00219767	-0.181321
60626	RIC8A	11p15.5	0.501222	6.44145	4.3332	0.000247082	0.00219914	-0.213469
54480	CHPF2	7q36.1	0.564959	6.40927	4.32813	0.000250224	0.00222514	-0.21229
9581	PREPL	2p21	-0.530655	6.39886	-4.32775	0.000250462	0.00222531	-0.268047
22807	IKZF2	2q34	-0.963595	3.98028	-4.32676	0.000251077	0.0022288	0.307571
253782	CERS6	2q24.3	-0.531387	5.9406	-4.32502	0.000252167	0.00223651	-0.189222
22996	TTC39A	1p32.3	0.457058	6.85137	4.32378	0.000252948	0.00224147	-0.313503
6249	CLIP1	12q24.31	-0.467124	6.82066	-4.32089	0.000254779	0.00225572	-0.271985
641	BLM	15q26.1	-1.02317	2.92369	-4.32005	0.000255307	0.00225841	0.29994
7114	TMSB4X	Xp22.2	0.616474	10.6454	4.31896	0.000256	0.00226256	-0.57684
79989	TTC26	7q34	-0.780437	4.0719	-4.31669	0.000257456	0.00227344	0.170709
6653	SORL1	11q24.1	-0.728298	6.45363	-4.31137	0.000260884	0.0023017	-0.253652
9156	EXO1	1q43	-1.40075	1.65049	-4.30645	0.000264103	0.00232807	0.470148
65084	TMEM135	11q14.2	-0.507343	5.98371	-4.305	0.000265056	0.00233444	-0.206401
85021	REPS1	6q24.1	-0.572511	5.50976	-4.30159	0.000267314	0.00235227	-0.127485
6549	SLC9A2	2q12.1	0.654867	5.37311	4.30102	0.000267697	0.00235287	-0.0930296
9113	LATS1	6q25.1	-0.625378	5.67674	-4.30079	0.000267848	0.00235287	-0.157804
51373	MRPS17	7p11.2	0.814187	3.94119	4.29924	0.000268886	0.00235897	0.18397
10026	PIGK	1p31.1	-0.700339	4.14504	-4.29905	0.00026901	0.00235897	0.0350167
11059	WWP1	8q21.3	0.377081	7.647	4.29753	0.00027003	0.00236587	-0.46015
57820	CCNB1IP1	14q11.2	-0.612662	4.45959	-4.29714	0.000270296	0.00236615	-0.0437307
23400	ATP13A2	1p36.13	0.601157	5.78701	4.29219	0.000273644	0.00239338	-0.216918
64417	TMEM267	5p12	-0.86478	3.73821	-4.29155	0.000274083	0.00239515	0.205969
340895	MALRD1	10p12.31	0.625126	5.89301	4.29107	0.00027441	0.00239593	-0.304523
473	RERE	1p36.23	-0.441662	6.75446	-4.28979	0.000275288	0.00240152	-0.350948
23250	ATP11A	13q34	0.541226	5.35659	4.28763	0.000276773	0.00241239	-0.162349
9657	IQCB1	3q13.33	-0.639022	4.87478	-4.2859	0.000277965	0.00242007	-0.0900533
729993	SHISA9	16p13.12	-0.53155	5.76929	-4.28566	0.000278133	0.00242007	-0.176781
55110	MAGOHB	12p13.2	-0.849704	3.78354	-4.28444	0.000278974	0.00242529	0.161364
83732	RIOK1	6p24.3	-0.782271	3.7881	-4.28322	0.000279824	0.00243059	0.129856
25875	LETMD1	12q13.12	-0.488542	6.28421	-4.28183	0.000280791	0.0024369	-0.313827
1452	CSNK1A1	5q32	-0.430822	7.70057	-4.27959	0.000282362	0.00244843	-0.517196
5901	RAN	12q24.33	-0.35965	8.67064	-4.27801	0.000283477	0.00245599	-0.606728
4957	ODF2	9q34.11	-0.473999	6.4295	-4.27607	0.000284848	0.00246576	-0.388212
134	ADORA1	1q32.1	1.15488	1.09028	4.27508	0.000285555	0.00246976	0.342306
655	BMP7	20q13.31	-0.433709	9.21383	-4.27273	0.000287229	0.00248211	-0.601873
1633	DCK	4q13.3	-0.699267	4.26104	-4.26669	0.000291578	0.00251754	-0.000680563
27124	INPP5J	22q12.2	-0.936291	5.08521	-4.2661	0.000292004	0.00251906	0.00703359
126282	TNFAIP8L1	19p13.3	-1.34456	2.17481	-4.26568	0.000292314	0.00251958	0.340816
84298	LLPH	12q14.3	0.520557	5.88068	4.26119	0.000295598	0.00254572	-0.339914
989	2007-09-01	7p14.2	-0.404822	7.83112	-4.25763	0.000298231	0.00256621	-0.586889
51088	KLHL5	4p14	0.865745	5.48268	4.25416	0.000300812	0.00258621	-0.181882
147040	KCTD11	17p13.1	0.793294	4.26208	4.25375	0.00030112	0.00258666	0.0766464
23513	SCRIB	8q24.3	0.443276	7.10543	4.25254	0.000302032	0.00259229	-0.526049
26056	RAB11FIP5	2p13.2	1.0027	3.76671	4.25155	0.000302773	0.00259605	0.190807
55288	RHOT1	17q11.2	-0.561195	5.48259	-4.25127	0.000302984	0.00259605	-0.233603
7538	ZFP36	19q13.2	0.645255	5.67288	4.25087	0.000303288	0.00259645	-0.274009
7516	XRCC2	7q36.1	-1.33957	2.24601	-4.24715	0.000306106	0.00261836	0.332735
990	CDC6	17q21.2	-0.909789	3.30584	-4.24607	0.000306933	0.00262321	-0.0268092
10787	NCKAP1	2q32.1	-0.451506	7.8124	-4.24557	0.000307314	0.00262425	-0.616991
8463	TEAD2	19q13.33	0.570988	5.30158	4.24511	0.000307664	0.00262502	-0.218674
55831	EMC3	3p25.3	0.390082	7.45294	4.24272	0.000309501	0.0026383	-0.575937
5702	PSMC3	11p11.2	-0.4439	7.1308	-4.24241	0.000309744	0.0026383	-0.566126
3178	HNRNPA1	12q13.13	-0.33402	9.81924	-4.24175	0.000310253	0.00264041	-0.743862
149175	MANEAL	1p34.3	0.524954	5.95677	4.23975	0.000311799	0.00265134	-0.38998
960	CD44	11p13	0.599753	4.33936	4.23735	0.000313662	0.00266494	-0.332855
10765	KDM5B	1q32.1	0.355927	8.7991	4.23637	0.000314433	0.00266925	-0.69173
23499	MACF1	1p34.3	0.506728	6.58398	4.23451	0.000315888	0.00267935	-0.49777
5937	RBMS1	2q24.2	0.723317	5.47726	4.2336	0.00031661	0.00268321	-0.233641
9070	ASH2L	8p11.23	-0.504729	5.40607	-4.23263	0.000317369	0.00268739	-0.282899
26503	SLC17A5	6q13	0.817935	4.69776	4.23159	0.000318197	0.00269215	-0.0718475
201294	UNC13D	17q25.1	0.825716	4.59546	4.23085	0.000318779	0.00269482	-0.0637463
9564	BCAR1	16q23.1	0.496892	6.19594	4.22965	0.000319729	0.00270059	-0.409505
4501	MT1X	16q13	-1.05241	3.88793	-4.22747	0.000321473	0.00271305	0.169964
10973	ASCC3	6q16.3	0.53497	6.31993	4.22611	0.00032256	0.00271996	-0.49316
9917	FAM20B	1q25.2	-0.396346	6.85021	-4.22318	0.000324926	0.00273762	-0.589363
11257	TP53TG1	7q21.12	0.893207	3.87892	4.22192	0.000325945	0.00274271	0.0340967
65005	MRPL9	1q21.3	-0.475283	6.68786	-4.22176	0.000326073	0.00274271	-0.543641
200424	TET3	2p13.1	-0.474194	6.94693	-4.22088	0.000326786	0.00274642	-0.572452
79183	TTPAL	20q13.12	0.550758	5.71617	4.21894	0.000328366	0.0027574	-0.385823
1728	NQO1	16q22.1	0.331545	9.98085	4.21755	0.000329504	0.00276466	-0.795303
23022	PALLD	4q32.3	0.501417	6.39582	4.21697	0.00032998	0.00276636	-0.430858
5887	RAD23B	9q31.2	0.337237	8.1341	4.21496	0.000331637	0.00277794	-0.717913
5253	PHF2	9q22.31	-0.487186	6.12687	-4.21458	0.000331945	0.00277822	-0.444359
6731	SRP72	4q12	-0.440465	7.65582	-4.21357	0.000332785	0.00278294	-0.69201
4128	MAOA	Xp11.3	2.00205	3.94655	4.21288	0.000333359	0.00278355	0.112677
55812	SPATA7	14q31.3	1.26645	3.27869	4.21272	0.000333487	0.00278355	0.174682
11135	CDC42EP1	22q13.1	-1.03926	3.60306	-4.21248	0.000333685	0.00278355	0.0874598
8871	SYNJ2	6q25.3	0.515139	6.01344	4.21086	0.000335038	0.00279253	-0.455763
79171	RBM42	19q13.12	-0.550253	5.9055	-4.21037	0.000335442	0.0027936	-0.436262
11073	TOPBP1	3q22.1	-0.46716	6.17089	-4.20795	0.000337466	0.00280814	-0.53714
9672	SDC3	1p35.2	0.615541	5.6822	4.20757	0.000337788	0.0028085	-0.387841
3017	HIST1H2BD	6p22.2	-0.642353	5.05955	-4.20568	0.000339384	0.00281859	-0.263905
2584	GALK1	17q25.1	0.633821	5.10156	4.20547	0.000339559	0.00281859	-0.27916
54838	WBP1L	10q24.32	0.504339	6.10164	4.20506	0.000339908	0.00281917	-0.466528
23673	STX12	1p35.3	0.592607	5.62779	4.20352	0.00034121	0.00282765	-0.38032
1666	DECR1	8q21.3	0.602073	6.43913	4.20229	0.000342256	0.00283399	-0.562574
816	CAMK2B	7p13	0.862029	4.46385	4.20152	0.000342912	0.00283561	-0.0912519
6888	TALDO1	11p15.5	0.370873	7.21263	4.2014	0.000343013	0.00283561	-0.66162
6880	TAF9	5q13.2	-0.57948	5.31294	-4.19976	0.000344413	0.00284486	-0.367442
58527	ABRACL	6q24.1	0.778458	5.35316	4.19638	0.00034732	0.00286555	-0.367555
9637	FEZ2	2p22.2	0.560259	5.79168	4.19619	0.000347486	0.00286555	-0.417217
1662	DDX10	11q22.3	0.615679	4.32969	4.1936	0.000349737	0.00288176	-0.301359
23788	MTCH2	11p11.2	0.401932	7.33093	4.19316	0.00035012	0.00288257	-0.704288
80331	DNAJC5	20q13.33	0.379274	7.72562	4.1904	0.000352524	0.00289847	-0.730639
55631	LRRC40	1p31.1	-0.748458	3.64515	-4.18996	0.000352911	0.00289847	-0.0651123
7804	LRP8	1p32.3	0.658963	4.68176	4.18968	0.000353162	0.00289847	-0.358152
200958	MUC20	3q29	1.03332	3.37359	4.18964	0.000353199	0.00289847	0.0995776
55191	NADSYN1	11q13.4	0.578326	6.76844	4.1891	0.00035367	0.00289998	-0.627237
5520	PPP2R2A	8p21.2	0.538617	5.73192	4.18616	0.000356264	0.00291888	-0.507049
374291	NDUFS7	19p13.3	-0.769418	4.29267	-4.18429	0.000357929	0.00292883	-0.151265
140576	S100A16	1q21.3	0.432446	8.56278	4.18385	0.000358317	0.00292883	-0.80444
4891	SLC11A2	12q13.12	-0.415134	6.59266	-4.18382	0.000358348	0.00292883	-0.610994
192683	SCAMP5	15q24.2	0.775692	4.64299	4.18133	0.000360568	0.00294459	-0.186687
6617	SNAPC1	14q23.2	-1.00562	3.03659	-4.18014	0.00036164	0.00295096	0.0712086
9742	IFT140	16p13.3	-0.485099	6.44266	-4.17499	0.000366303	0.00298237	-0.621605
4898	NRDC	1p32.3	-0.367052	7.91648	-4.17492	0.000366366	0.00298237	-0.809228
10325	RRAGB	Xp11.21	0.714708	4.31633	4.17489	0.000366389	0.00298237	-0.17355
10180	RBM6	3p21.31	0.416771	6.95507	4.17458	0.000366671	0.00298237	-0.691515
115290	FBXO17	19q13.2	-0.994182	3.12658	-4.17332	0.000367822	0.00298933	0.0731547
6415	SELENOW	19q13.33	0.596906	6.3031	4.17232	0.00036874	0.00299439	-0.588423
80228	ORAI2	7q22.1	0.636972	5.12599	4.16906	0.000371746	0.00301637	-0.341518
9274	BCL7C	16p11.2	-0.773448	4.33607	-4.16713	0.000373532	0.00302843	-0.150355
55692	LUC7L	16p13.3	0.506448	5.95335	4.16676	0.00037387	0.00302874	-0.539474
9413	FAM189A2	9q21.12	1.42454	3.0775	4.16235	0.000377992	0.00305968	0.122505
79269	DCAF10	9p13.2	0.614096	5.62601	4.16174	0.000378569	0.0030619	-0.531587
79818	ZNF552	19q13.43	0.732999	4.67903	4.16065	0.000379595	0.00306774	-0.416493
54206	ERRFI1	1p36.23	-0.480994	6.01593	-4.16001	0.000380207	0.00307022	-0.571473
3070	HELLS	10q23.33	-0.985473	2.99177	-4.15863	0.000381505	0.00307825	-0.0406164
83879	CDCA7	2q31.1	-1.23221	2.82724	-4.15489	0.00038507	0.00310453	-0.119218
221294	NT5DC1	6q22.1	0.464088	5.91672	4.15421	0.00038572	0.0031073	-0.601993
30968	STOML2	9p13.3	-0.493661	5.83207	-4.15349	0.000386416	0.00311042	-0.577799
5692	PSMB4	1q21.3	0.337785	8.47098	4.15278	0.000387101	0.00311345	-0.884648
6813	STXBP2	19p13.2	-0.421835	6.31115	-4.14929	0.000390475	0.00313809	-0.650218
54880	BCOR	Xp11.4	-0.464392	6.47852	-4.14577	0.000393899	0.00316309	-0.692068
9129	PRPF3	1q21.2	-0.368453	6.86636	-4.14396	0.000395683	0.00317489	-0.766491
80097	MZT2B	2q21.1	-0.721678	4.60742	-4.14241	0.00039721	0.00318462	-0.380463
94103	ORMDL3	17q21.1	0.484466	6.36366	4.1406	0.000399002	0.00319644	-0.651916
55603	FAM46A	6q14.1	-0.641017	5.32034	-4.13782	0.000401767	0.00321512	-0.497549
8535	CBX4	17q25.3	-0.461644	6.92664	-4.13762	0.000401969	0.00321512	-0.776668
8541	PPFIA3	19q13.33	0.652518	4.64068	4.13609	0.0004035	0.00321766	-0.370895
3748	KCNC3	19q13.33	1.23882	4.82932	4.13593	0.000403656	0.00321766	-0.269474
6097	RORC	1q21.3	-0.844086	4.28926	-4.13585	0.000403739	0.00321766	-0.22885
94121	SYTL4	Xq22.1	1.37956	2.29912	4.13527	0.000404317	0.00321766	0.0366597
1663	DDX11	12p11.21	-0.763643	4.7424	-4.13523	0.00040436	0.00321766	-0.421749
8932	MBD2	18q21.2	0.483785	6.91888	4.13499	0.000404605	0.00321766	-0.743717
57707	TLDC1	16q24.1	0.568451	5.48389	4.13476	0.000404832	0.00321766	-0.532637
784	CACNB3	12q13.12	0.510858	6.31551	4.13476	0.000404835	0.00321766	-0.652727
92140	MTDH	8q22.1	-0.41864	7.86789	-4.13373	0.000405868	0.00322333	-0.903876
1655	DDX5	17q23.3	0.301022	10.5403	4.13228	0.000407335	0.00323012	-1.04027
55670	PEX26	22q11.21	0.513959	5.6187	4.13225	0.000407362	0.00323012	-0.579277
4291	MLF1	3q25.32	0.574051	5.55155	4.13092	0.000408717	0.00323832	-0.585631
7798	LUZP1	1p36.12	0.665499	5.34476	4.12911	0.000410559	0.00325037	-0.494853
57211	ADGRG6	6q24.2	-0.643223	6.55001	-4.12858	0.000411094	0.00325205	-0.756278
309	ANXA6	5q33.1	0.364278	8.63831	4.12765	0.000412053	0.00325612	-0.956576
23248	RPRD2	1q21.2	-0.406652	7.23931	-4.12745	0.000412253	0.00325612	-0.842919
57446	NDRG3	20q11.23	0.49495	5.79814	4.12576	0.000413987	0.00326727	-0.612967
10451	VAV3	1p13.3	-0.437825	7.10405	-4.12484	0.000414939	0.00327222	-0.886414
90557	CCDC74A	2q21.1	0.577828	4.99894	4.12237	0.000417487	0.00328975	-0.610128
25788	RAD54B	8q22.1	-1.08498	3.21516	-4.12134	0.000418562	0.00329565	-0.160818
266655	BRD3OS	9q34.2	0.617893	5.20979	4.11649	0.000423642	0.00333304	-0.49367
10801	2009-09-01	17q25.3	0.350112	8.7446	4.11573	0.00042444	0.00333673	-0.995098
5738	PTGFRN	1p13.1	0.37078	8.33372	4.11471	0.000425517	0.00334128	-0.968894
57634	EP400	12q24.33	-0.448121	6.69246	-4.11455	0.00042568	0.00334128	-0.811677
10069	RWDD2B	21q21.3	0.520145	5.46948	4.1139	0.000426373	0.00334412	-0.618513
6305	SBF1	22q13.33	-0.52025	6.60724	-4.11271	0.000427629	0.0033511	-0.786723
3069	HDLBP	2q37.3	-0.309159	10.0756	-4.11243	0.000427927	0.0033511	-1.06923
28974	C19orf53	19p13.13	0.598175	5.49998	4.11189	0.00042851	0.00335306	-0.608174
10478	SLC25A17	22q13.2	0.632177	5.02351	4.11121	0.000429234	0.00335613	-0.526976
6155	RPL27	17q21.31	0.447561	8.23854	4.10995	0.000430574	0.003364	-0.990838
2760	GM2A	5q33.1	0.427365	6.14647	4.10612	0.000434698	0.0033936	-0.778813
4720	NDUFS2	1q23.3	-0.395177	7.15108	-4.10505	0.000435854	0.00339999	-0.903351
9988	DMTF1	7q21.12	-0.491616	5.66673	-4.10189	0.000439287	0.00342414	-0.67388
5621	PRNP	20p13	-0.607848	5.49117	-4.10149	0.000439723	0.00342489	-0.647569
175	AGA	4q34.3	-0.589492	4.89372	-4.10055	0.000440753	0.00343027	-0.560273
401546	C9orf152	9q31.3	-0.974234	3.87795	-4.09985	0.000441522	0.0034323	-0.252358
105377819	NA	NA	-1.36635	3.57206	-4.09969	0.000441694	0.0034323	-0.180557
80010	RMI1	9q21.32	-0.907988	3.6743	-4.09512	0.000446738	0.00346883	-0.251472
6508	SLC4A3	2q35	0.840218	4.35403	4.0938	0.000448206	0.00347756	-0.385138
26065	LSM14A	19q13.11	-0.450672	7.74742	-4.09206	0.000450149	0.00348995	-0.976034
284613	CYB561D1	1p13.3	0.521128	5.80319	4.08484	0.000458286	0.00355031	-0.703355
56134	PCDHAC2	5q31.3	1.20256	3.43086	4.0845	0.000458674	0.0035506	-0.0633915
10906	TRAFD1	12q24.13	0.461142	6.51197	4.08323	0.000460128	0.00355873	-0.838553
444	ASPH	8q12.3	-0.463219	5.12179	-4.08277	0.000460651	0.00355873	-0.728181
64116	SLC39A8	4q24	0.810024	4.68057	4.08266	0.000460781	0.00355873	-0.676998
80223	RAB11FIP1	8p11.23	0.38776	6.67137	4.07708	0.000467205	0.00360558	-0.876884
9092	SART1	11q13.1	-0.458974	6.25132	-4.0764	0.000467994	0.00360891	-0.823079
55013	MCUB	4q25	-0.736369	4.26654	-4.07389	0.00047092	0.00362615	-0.475113
64969	MRPS5	2q11.1	-0.478811	5.92126	-4.07387	0.000470947	0.00362615	-0.797687
219699	UNC5B	10q22.1	-1.00097	3.50065	-4.07303	0.000471934	0.00363098	-0.271808
10362	HMG20B	19p13.3	-0.401576	7.27387	-4.07244	0.000472618	0.00363348	-0.974999
23313	KIAA0930	22q13.31	0.51469	6.11509	4.07159	0.00047362	0.00363841	-0.792362
1069	CETN2	Xq28	0.410505	7.05388	4.06937	0.000476236	0.00365573	-0.965662
11000	SLC27A3	1q21.3	0.546867	5.58014	4.06739	0.000478589	0.003671	-0.700549
8837	CFLAR	2q33.1	-0.532536	5.44487	-4.06592	0.000480329	0.00368155	-0.692911
22916	NCBP2	3q29	0.407077	8.46003	4.06513	0.000481279	0.00368603	-1.10721
6573	SLC19A1	21q22.3	0.672133	4.89936	4.06394	0.000482699	0.00369411	-0.619757
63898	SH2D4A	8p21.3	-0.840207	4.52258	-4.0631	0.000483712	0.00369906	-0.443434
6041	RNASEL	1q25.3	0.810754	4.06694	4.06128	0.000485903	0.00371301	-0.40451
28512	NKIRAS1	3p24.2	0.717316	4.24584	4.05748	0.000490504	0.00374533	-0.447117
8428	STK24	13q32.2	-0.429345	6.6013	-4.05465	0.000493961	0.00376888	-0.940783
54535	CCHCR1	6p21.33	-1.02907	3.67417	-4.05377	0.000495037	0.00377424	-0.316314
8379	MAD1L1	7p22.3	-0.667617	4.58771	-4.05311	0.000495854	0.00377761	-0.556443
220042	DDIAS	11q14.1	-1.35754	1.88292	-4.05101	0.000498448	0.00379452	-0.240967
7705	ZNF146	19q13.12	-0.365265	7.45253	-4.04873	0.000501271	0.00381313	-1.08405
6810	STX4	16p11.2	0.509847	5.91158	4.04836	0.000501733	0.00381378	-0.810993
23594	ORC6	16q11.2	-1.18366	1.94395	-4.04746	0.000502861	0.00381948	-0.194832
25940	FAM98A	2p22.3	0.460723	5.78825	4.04639	0.000504193	0.00382672	-0.84368
159195	USP54	10q22.2	-0.588164	5.33152	-4.04513	0.000505772	0.00383582	-0.739296
11145	PLA2G16	11q12.3-q13.1	0.641181	4.7549	4.04313	0.000508287	0.003852	-0.637397
9619	ABCG1	21q22.3	-0.66347	7.67902	-4.04267	0.000508877	0.00385358	-1.05427
54868	TMEM104	17q25.1	0.75754	3.96657	4.03971	0.000512621	0.00387855	-0.436721
388403	YPEL2	17q22	0.655106	5.9831	4.03946	0.000512943	0.00387855	-0.786431
7182	NR2C2	3p25.1	-0.786479	4.16843	-4.03841	0.000514277	0.0038842	-0.474221
158	ADSL	22q13.1	-0.482973	5.83465	-4.03827	0.000514459	0.0038842	-0.874466
7508	XPC	3p25.1	0.456367	7.45602	4.03652	0.000516703	0.0038963	-1.09207
10291	SF3A1	22q12.2	-0.370119	7.22718	-4.03616	0.000517156	0.0038963	-1.06862
29956	CERS2	1q21.3	0.348938	9.95244	4.03611	0.000517218	0.0038963	-1.22664
192111	PGAM5	12q24.33	0.562978	5.59171	4.03528	0.000518289	0.00390146	-0.849701
81617	CAB39L	13q14.2	0.737064	4.80326	4.03134	0.000523375	0.00393681	-0.606511
466	ATF1	12q13.12	-0.450208	5.66892	-4.03046	0.00052453	0.00394228	-0.862188
79723	SUV39H2	10p13	-0.741287	4.08478	-4.03018	0.000524883	0.00394228	-0.552615
55008	HERC6	4q22.1	-0.748978	3.30341	-4.02633	0.000529922	0.00397508	-0.536974
1797	DXO	6p21.33	-0.802119	4.02301	-4.02625	0.000530037	0.00397508	-0.484701
83648	FAM167A	8p23.1	-1.39887	2.92286	-4.02566	0.00053081	0.00397625	-0.178491
326625	MMAB	12q24.11	-0.526555	5.24473	-4.02553	0.00053098	0.00397625	-0.77712
112869	SGF29	16p11.2	-0.72863	4.31933	-4.01793	0.000541081	0.00404889	-0.534149
23641	LDOC1	Xq27.1	0.414681	8.02512	4.01023	0.000551518	0.00412115	-1.16561
22954	TRIM32	9q33.1	0.575138	4.77144	4.0102	0.000551553	0.00412115	-0.726412
129303	TMEM150A	2p11.2	0.669176	4.81386	4.00938	0.000552679	0.0041265	-0.627657
5429	POLH	6p21.1	0.581888	5.29491	4.00804	0.000554529	0.00413726	-0.878353
2517	FUCA1	1p36.11	0.436797	6.48749	4.00646	0.000556702	0.00415041	-0.992917
163786	SASS6	1p21.2	-1.50433	2.02149	-4.00559	0.000557901	0.00415628	-0.190406
10486	CAP2	6p22.3	-0.487507	5.03068	-4.0044	0.000559546	0.00416547	-0.950928
10106	CTDSP2	12q14.1	-0.350565	8.64536	-4.00357	0.000560699	0.00417097	-1.25176
55388	MCM10	10p13	-0.934833	2.32112	-4.00048	0.00056502	0.00419861	-0.534708
2130	EWSR1	22q12.2	-0.424073	8.21352	-4.00032	0.000565245	0.00419861	-1.25492
22955	SCMH1	1p34.2	-1.19749	3.70808	-3.99811	0.000568343	0.00421253	-0.391261
55806	HR	8p21.3	0.746005	3.82578	3.99787	0.00056869	0.00421253	-0.621059
286827	TRIM59	3q25.33	-1.0064	3.59019	-3.99783	0.000568734	0.00421253	-0.454708
56899	ANKS1B	12q23.1	-0.888318	4.31145	-3.9978	0.000568787	0.00421253	-0.629884
5928	RBBP4	1p35.1	-0.339401	8.01744	-3.99601	0.000571312	0.00422813	-1.24525
79647	AKIRIN1	1p34.3	0.452361	5.94898	3.99563	0.000571848	0.00422899	-0.988208
23020	SNRNP200	2q11.2	-0.355234	8.94035	-3.99183	0.000577272	0.00426599	-1.30936
22845	DOLK	9q34.11	0.76954	4.46487	3.99108	0.000578336	0.00426924	-0.655004
2690	GHR	5p13.1-p12	0.836226	4.93518	3.99087	0.000578646	0.00426924	-0.676966
4642	MYO1D	17q11.2	-0.399474	6.90277	-3.99063	0.00057898	0.00426924	-1.1165
155066	ATP6V0E2	7q36.1	0.736073	5.27569	3.9892	0.000581041	0.00428131	-0.81078
8323	FZD6	8q22.3	-0.431712	6.98722	-3.98831	0.000582325	0.00428459	-1.14292
8082	SSPN	12p12.1	-1.07911	3.30684	-3.9883	0.000582335	0.00428459	-0.407763
80709	AKNA	9q32	-0.790198	3.48089	-3.98682	0.000584486	0.00429729	-0.478574
9131	AIFM1	Xq26.1	0.387266	7.40377	3.98608	0.000585552	0.004302	-1.22019
340485	ACER2	9p22.1	1.1379	3.3761	3.98323	0.000589709	0.00432939	-0.341719
11030	RBPMS	8p12	0.461304	5.8972	3.98148	0.000592261	0.00434497	-0.987391
1736	DKC1	Xq28	-0.416965	7.13142	-3.98099	0.000592992	0.00434718	-1.23542
1363	CPE	4q32.3	0.408764	7.34755	3.98028	0.000594026	0.0043516	-1.23889
51768	TM7SF3	12p11.23	0.627175	7.62409	3.97947	0.000595231	0.00435726	-1.25476
10197	PSME3	17q21.31	0.377334	6.74913	3.97504	0.000601799	0.00440215	-1.16981
51155	JPT1	17q25.1	0.418637	6.90709	3.97312	0.000604673	0.00441998	-1.20713
84939	MUM1	19p13.3	0.580024	4.90048	3.97236	0.000605805	0.00442505	-0.785646
202243	CCDC125	5q13.2	0.445265	6.08537	3.97022	0.00060903	0.00444539	-1.04266
51596	CUTA	6p21.32	0.451406	7.25485	3.96967	0.000609863	0.00444826	-1.21551
50804	MYEF2	15q21.1	-0.537371	5.49556	-3.96732	0.000613421	0.00447098	-0.967933
55277	FGGY	1p32.1	0.98286	3.49339	3.96602	0.000615395	0.00448214	-0.502472
5332	PLCB4	20p12.3-p12.2	-0.596829	5.54757	-3.965	0.00061696	0.00449029	-0.939615
9631	NUP155	5p13.2	-0.591839	5.33063	-3.96388	0.000618673	0.00449952	-0.980915
10994	ILVBL	19p13.12	-0.572284	5.83865	-3.9635	0.000619251	0.00450048	-1.03783
7105	TSPAN6	Xq22.1	0.846158	3.91293	3.96184	0.0006218	0.00451576	-0.64381
11163	NUDT4	12q22	-0.460375	6.71	-3.96111	0.000622923	0.00452067	-1.12427
85301	COL27A1	9q32	0.733826	4.26298	3.95983	0.000624913	0.00453185	-0.795805
729830	FAM160A1	4q31.3	-0.647481	5.33823	-3.95639	0.000630264	0.00456738	-0.933713
114904	C1QTNF6	22q12.3	0.658388	4.37474	3.95582	0.00063114	0.00457045	-0.806705
28977	MRPL42	12q22	-0.543397	5.49197	-3.95473	0.000632849	0.00457736	-1.03815
1387	CREBBP	16p13.3	-0.41565	7.42605	-3.95464	0.000633001	0.00457736	-1.26311
284114	TMEM102	17p13.1	1.15709	2.83398	3.9541	0.000633835	0.00458012	-0.381733
90427	BMF	15q15.1	-0.734987	5.04402	-3.95205	0.000637077	0.00460025	-0.740524
22948	CCT5	5p15.2	-0.327088	8.61997	-3.95059	0.000639374	0.00461354	-1.41077
65263	PYCR3	8q24.3	0.762072	4.39442	3.94735	0.000644526	0.0046474	-0.791568
3673	ITGA2	5q11.2	-0.50472	5.80323	-3.94636	0.000646104	0.00465346	-1.11088
79834	PEAK1	15q24.3	-0.545592	6.07815	-3.94625	0.000646288	0.00465346	-1.09267
80179	MYO19	17q12	-0.670267	4.86808	-3.94361	0.000650519	0.00468059	-0.920997
6009	RHEB	7q36.1	-0.439252	6.31257	-3.94216	0.000652859	0.00469408	-1.1953
402778	IFITM10	11p15.5	0.648463	4.53986	3.94184	0.000653387	0.00469454	-1.01887
84260	TCHP	12q24.11	-0.526209	4.98619	-3.94072	0.000655197	0.00470419	-0.93487
140739	UBE2F	2q37.3	0.889185	3.63311	3.93982	0.000656665	0.00470985	-0.572306
22925	PLA2R1	2q24.2	0.651644	5.05905	3.93966	0.000656917	0.00470985	-0.841849
25913	POT1	7q31.33	-0.987738	3.29568	-3.93459	0.000665213	0.00476425	-0.498093
373156	GSTK1	7q34	0.39565	6.65237	3.93432	0.000665661	0.00476425	-1.23969
5154	PDGFA	7p22.3	0.684462	4.60012	3.93416	0.00066592	0.00476425	-0.819592
9368	SLC9A3R1	17q25.1	0.396042	9.33284	3.9314	0.000670498	0.00479361	-1.48538
389906	LOC389906	Xp22.33	0.832251	3.96366	3.93045	0.000672067	0.00480143	-0.632208
23353	SUN1	7p22.3	-0.448085	7.30369	-3.92966	0.00067339	0.00480748	-1.3322
64860	ARMCX5	Xq22.1	0.615507	4.51332	3.92889	0.000674664	0.00481165	-0.862105
101926996	RUNDC3A-AS1	17q21.31	0.847855	4.85806	3.92874	0.000674926	0.00481165	-0.847642
11247	NXPH4	12q13.3	-0.91174	3.66579	-3.9276	0.000676824	0.00482177	-0.665977
10614	HEXIM1	17q21.31	0.457543	6.14862	3.9256	0.000680191	0.00484235	-1.14507
84270	CARD19	9q22.31	0.729236	3.76611	3.92501	0.000681183	0.00484599	-0.734116
6667	SP1	12q13.13	-0.375868	7.28545	-3.92403	0.00068283	0.00485429	-1.34858
29763	PACSIN3	11p11.2	-0.452753	6.09682	-3.91997	0.000689728	0.00489988	-1.18559
8543	LMO4	1p22.3	-0.67028	4.76553	-3.9185	0.000692251	0.00491435	-0.847361
5062	PAK2	3q29	0.310572	9.55876	3.91742	0.000694106	0.00492405	-1.51002
11334	TUSC2	3p21.31	0.637651	4.92329	3.91661	0.000695485	0.00493038	-0.942642
60491	NIF3L1	2q33.1	-0.563662	5.1947	-3.91624	0.000696127	0.00493147	-1.02108
10140	TOB1	17q21.33	0.426336	8.79125	3.91416	0.00069972	0.00495146	-1.49098
55081	IFT57	3q13.12-q13.13	0.465135	5.93717	3.91404	0.000699929	0.00495146	-1.17034
23244	PDS5A	4p14	-0.452405	7.81731	-3.91336	0.000701104	0.0049563	-1.43464
80024	SLC8B1	12q24.13	0.828217	3.74341	3.91263	0.000702372	0.00496179	-0.63787
132299	OCIAD2	4p11	0.560092	5.41031	3.91074	0.000705669	0.0049816	-1.08534
100170841	EPOP	17q12	0.893644	4.21121	3.90968	0.000707517	0.00499116	-0.764121
84955	NUDCD1	8q23.1	0.520934	5.63991	3.90873	0.000709188	0.00499945	-1.17088
9261	MAPKAPK2	1q32.1	0.321965	7.56813	3.90771	0.000710982	0.0050086	-1.42693
103910	MYL12B	18p11.31	0.339015	10.5974	3.90723	0.000711818	0.005011	-1.58332
64778	FNDC3B	3q26.31	-0.513236	5.41895	-3.90619	0.000713652	0.00502041	-1.10051
10553	HTATIP2	11p15.1	0.494093	5.58721	3.90545	0.000714971	0.00502398	-1.16266
8824	CES2	16q22.1	0.4431	6.16459	3.90534	0.000715154	0.00502398	-1.22977
2539	G6PD	Xq28	0.596943	8.80629	3.90432	0.000716962	0.00503318	-1.53511
100507217	LINC01578	15q26.1	-0.514452	6.57382	-3.90121	0.000722498	0.00506852	-1.29487
1951	CELSR3	3p21.31	-0.600211	5.35172	-3.89907	0.000726335	0.00509191	-1.01273
344148	NCKAP5	2q21.2	0.981476	3.15244	3.89338	0.00073664	0.00516057	-0.623254
11270	NRM	6p21.33	-1.01957	3.04128	-3.89267	0.000737932	0.00516604	-0.662137
3661	IRF3	19q13.33	0.471359	6.18932	3.89217	0.000738841	0.00516882	-1.25608
6634	SNRPD3	22q11.23	-0.335883	7.76757	-3.88986	0.000743072	0.00519482	-1.49635
3163	HMOX2	16p13.3	0.511375	5.84143	3.8887	0.000745208	0.00520615	-1.23456
56650	CLDND1	3q11.2	-0.627611	5.11907	-3.88792	0.000746656	0.00521266	-1.08187
9467	SH3BP5	3p25.1	0.531407	5.71157	3.88691	0.000748506	0.00522197	-1.16563
3315	HSPB1	7q11.23	0.486926	10.1486	3.88271	0.000756322	0.00527285	-1.63503
11240	PADI2	1p36.13	-1.3302	2.50445	-3.88132	0.000758929	0.00528738	-0.566372
9569	GTF2IRD1	7q11.23	-0.461112	5.78628	-3.87895	0.000763396	0.00531484	-1.23062
51633	OTUD6B	8q21.3	0.511715	5.20508	3.87798	0.000765218	0.00532385	-1.19747
84649	DGAT2	11q13.5	-1.08413	2.26516	-3.87688	0.0007673	0.00533466	-0.588754
79042	TSEN34	19q13.42	0.404713	6.78033	3.87509	0.000770705	0.00535465	-1.38084
116092	DNTTIP1	20q13.12	-0.492675	5.69516	-3.87255	0.000775567	0.00538472	-1.23477
51035	UBXN1	11q12.3	-0.415738	6.85115	-3.86866	0.000783048	0.00543293	-1.40638
10657	KHDRBS1	1p35.2	-0.379764	7.88342	-3.8675	0.000785306	0.00544486	-1.5531
54680	ZNHIT6	1p22.3	-0.763249	3.6923	-3.86566	0.000788893	0.00546598	-0.818633
2081	ERN1	17q23.3	-0.774106	3.53469	-3.8609	0.000798209	0.00552674	-0.816986
5425	POLD2	7p13	-0.463118	5.95432	-3.85921	0.000801567	0.00554619	-1.37166
1200	TPP1	11p15.4	0.509678	6.36197	3.85813	0.000803695	0.00555419	-1.36653
6692	SPINT1	15q15.1	0.3674	8.15645	3.85807	0.000803823	0.00555419	-1.56879
79719	AAGAB	15q23	0.370391	6.84999	3.85235	0.000815254	0.00562932	-1.46922
6498	SKIL	3q26.2	0.469374	6.22393	3.85098	0.000818023	0.00564459	-1.37715
51741	WWOX	16q23.1-q23.2	0.458448	6.37646	3.85036	0.00081928	0.0056494	-1.33979
9149	DYRK1B	19q13.2	0.625177	5.04662	3.8478	0.000824475	0.00568134	-1.07842
5094	PCBP2	12q13.13	-0.312017	9.7991	-3.84601	0.00082813	0.00570264	-1.70167
79885	HDAC11	3p25.1	0.424911	6.01943	3.84533	0.000829523	0.00570834	-1.38603
5863	RGL2	6p21.32	0.369217	8.12355	3.84473	0.000830748	0.00571288	-1.59674
22938	SNW1	14q24.3	-0.417331	6.54906	-3.84318	0.000833926	0.00572929	-1.45899
3192	HNRNPU	1q44	-0.382142	9.06453	-3.84302	0.000834268	0.00572929	-1.68328
83596	BCL2L12	19q13.33	-0.843567	3.53105	-3.84171	0.000836961	0.00574387	-0.863613
257000	TINCR	19p13.3	0.525691	5.06192	3.8409	0.000838631	0.00575143	-1.18576
6196	RPS6KA2	6q27	-0.617486	4.42729	-3.83818	0.000844302	0.00578639	-1.12777
79142	PHF23	17p13.1	0.488674	5.64231	3.8372	0.000846338	0.00579641	-1.29336
79038	ZFYVE21	14q32.33	0.45929	5.89488	3.83604	0.000848759	0.00580906	-1.36011
1605	DAG1	3p21.31	0.349782	7.78141	3.8348	0.000851373	0.005823	-1.59602
29109	FHOD1	16q22.1	0.549022	5.7799	3.83379	0.000853491	0.00583354	-1.34743
1385	CREB1	2q33.3	-0.498355	5.66552	-3.831	0.000859399	0.00586994	-1.31443
11252	PACSIN2	22q13.2	-0.47185	6.38486	-3.83052	0.00086042	0.00587031	-1.45072
10128	LRPPRC	2p21	-0.33432	8.65745	-3.83042	0.000860614	0.00587031	-1.68939
165215	FAM171B	2q32.1	-0.580979	5.61777	-3.82411	0.000874123	0.00595843	-1.22943
659	BMPR2	2q33.1-q33.2	0.3922	7.25204	3.82348	0.000875492	0.00596374	-1.57766
8761	PABPC4	1p34.3	-0.337756	7.27708	-3.82288	0.000876787	0.00596853	-1.60325
5104	SERPINA5	14q32.13	0.488492	5.63271	3.81621	0.000891345	0.00606008	-1.61525
79007	DBNDD1	16q24.3	0.474242	7.53296	3.81617	0.000891435	0.00606008	-1.61852
58190	CTDSP1	2q35	-0.391795	6.81198	-3.81555	0.000892789	0.0060652	-1.50474
54463	RETREG1	5p15.1	0.671736	4.6251	3.81511	0.000893773	0.00606781	-1.08623
253725	WASHC2C	10q11.22	0.54374	5.73664	3.81468	0.000894714	0.00607011	-1.31235
80129	CCDC170	6q25.1	-0.477078	5.79397	-3.81223	0.000900134	0.00609863	-1.41766
91137	SLC25A46	5q22.1	0.534465	5.35479	3.81201	0.000900625	0.00609863	-1.29329
64780	MICAL1	6q21	0.886248	4.58965	3.81196	0.000900728	0.00609863	-1.02846
6566	SLC16A1	1p13.2	-0.599673	3.8727	-3.81164	0.000901441	0.00609937	-1.13355
5204	PFDN5	12q13.13	0.447798	7.41273	3.8106	0.000903776	0.00611108	-1.6419
10591	DNPH1	6p21.1	-0.462818	5.36689	-3.80965	0.000905897	0.00612132	-1.37319
9240	PNMA1	14q24.3	0.418637	6.36572	3.80842	0.000908637	0.00613291	-1.49205
79624	ARMT1	6q25.1	-0.383726	9.09342	-3.80834	0.000908826	0.00613291	-1.7762
57822	GRHL3	1p36.11	1.07474	4.37202	3.80781	0.000910007	0.00613625	-0.79046
55706	NDC1	1p32.3	-0.521303	5.1542	-3.80757	0.000910536	0.00613625	-1.35235
55449	DHRS4-AS1	14q11.2	-0.611579	5.22757	-3.80459	0.000917257	0.00617742	-1.32828
5364	PLXNB1	3p21.31	0.536076	6.96702	3.80237	0.000922291	0.00620719	-1.5593
84629	TNRC18	7p22.1	-0.365348	8.25607	-3.80119	0.000924999	0.00622127	-1.71704
6924	ELOA	1p36.11	-0.390401	6.35387	-3.80084	0.000925792	0.00622246	-1.52854
64978	MRPL38	17q25.1	-0.500858	5.61427	-3.79851	0.000931124	0.00625413	-1.39653
338596	ST8SIA6	10p12.33	-0.694864	5.09403	-3.79719	0.000934155	0.00627032	-1.29068
6884	TAF13	1p13.3	0.591136	4.79939	3.79535	0.000938402	0.00629045	-1.21723
92714	ARRDC1	9q34.3	0.479512	6.60336	3.79532	0.000938479	0.00629045	-1.52942
10755	GIPC1	19p13.12	0.386429	6.8788	3.79508	0.000939022	0.00629045	-1.58999
23555	TSPAN15	10q22.1	0.48037	6.53217	3.79451	0.000940356	0.00629522	-1.53459
7982	ST7	7q31.2	-0.833719	3.84876	-3.79375	0.000942105	0.00630274	-0.97546
9755	TBKBP1	17q21.32	0.780169	3.98306	3.79333	0.000943081	0.0063051	-1.03372
10096	ACTR3	2q14.1	-0.360349	7.42819	-3.79303	0.000943786	0.00630564	-1.69304
7168	TPM1	15q22.2	0.437134	7.01679	3.78768	0.000956325	0.00638519	-1.65148
55012	PPP2R3C	14q13.2	-0.646419	4.03071	-3.78737	0.00095705	0.00638581	-1.08165
51291	GMIP	19p13.11	0.739537	4.5594	3.78634	0.000959491	0.00639449	-1.15827
26578	OSTF1	9q21.13	0.538063	4.87328	3.78628	0.000959616	0.00639449	-1.30438
25840	METTL7A	12q13.12	-0.873737	2.61789	-3.78527	0.00096202	0.00640425	-0.982406
1808	DPYSL2	8p21.2	-0.696861	3.67591	-3.78513	0.00096235	0.00640425	-1.0749
6500	SKP1	5q31.1	0.339561	9.07614	3.78485	0.000963008	0.00640442	-1.81696
22904	SBNO2	19p13.3	-0.437632	5.98887	-3.78388	0.000965316	0.00641554	-1.48546
196410	METTL7B	12q13.2	1.05594	2.49489	3.78353	0.000966158	0.00641691	-0.849612
11161	ERG28	14q24.3	0.458467	5.58667	3.78202	0.000969749	0.00643653	-1.44104
3064	HTT	4p16.3	0.451973	7.21593	3.77847	0.000978266	0.0064888	-1.70369
26093	CCDC9	19q13.32	-0.652379	4.558	-3.77619	0.000983793	0.00651966	-1.20022
83719	YPEL3	16p11.2	0.528536	6.61242	3.77602	0.00098421	0.00651966	-1.5233
7247	TSN	2q14.3	-0.392204	6.62737	-3.77555	0.000985337	0.00652286	-1.64083
29080	CCDC59	12q21.31	-0.567518	5.01276	-3.7745	0.000987898	0.00653552	-1.33655
51076	CUTC	10q24.2	0.698526	3.83132	3.77412	0.00098883	0.00653741	-1.10562
56339	METTL3	14q11.2	-0.500412	5.36113	-3.77271	0.000992263	0.00655582	-1.42489
6642	SNX1	15q22.31	0.329465	7.25935	3.77051	0.000997642	0.00658705	-1.72246
2967	GTF2H3	12q24.31	-0.43453	5.74622	-3.76875	0.00100199	0.0066114	-1.51224
157638	FAM84B	8q24.21	-0.292774	8.71065	-3.76646	0.00100766	0.0066445	-1.83767
5317	PKP1	1q32.1	-1.00892	3.5644	-3.76423	0.00101321	0.00667671	-0.903655
9541	CIR1	2q31.1	-0.456318	5.56347	-3.76368	0.00101458	0.00667995	-1.46881
399818	EEF1AKMT2	10q26.13	-0.696738	4.54372	-3.7635	0.00101502	0.00667995	-1.24075
196441	ZFC3H1	12q21.1	-0.482451	6.38688	-3.76303	0.00101622	0.00668348	-1.61298
27163	NAAA	4q21.1	0.487127	5.4283	3.76243	0.0010177	0.00668887	-1.42848
23389	MED13L	12q24.21	-0.359308	7.78109	-3.76187	0.00101911	0.00669377	-1.83389
90850	ZNF598	16p13.3	-0.52189	6.22955	-3.76102	0.00102125	0.0067035	-1.60994
51507	RTF2	20q13.31	0.303666	8.06764	3.75927	0.00102565	0.00672802	-1.81794
55341	LSG1	3q29	0.399196	6.32804	3.75864	0.00102726	0.00673419	-1.6367
92259	MRPS36	5q13.2	0.643723	4.55762	3.75591	0.00103417	0.00677512	-1.20373
57465	TBC1D24	16p13.3	0.807961	4.79853	3.75498	0.00103656	0.00678632	-1.31586
28987	NOB1	16q22.1	-0.37639	6.94609	-3.75388	0.00103937	0.00680037	-1.7217
55314	TMEM144	4q32.1	0.637945	4.46352	3.75339	0.00104062	0.00680413	-1.22366
23536	ADAT1	16q23.1	0.480074	5.34592	3.75071	0.00104751	0.00684469	-1.48005
153241	CEP120	5q23.2	-0.663677	4.5559	-3.7502	0.00104883	0.00684893	-1.32378
50814	NSDHL	Xq28	0.454322	5.94209	3.74837	0.00105355	0.00687192	-1.58023
23317	DNAJC13	3q22.1	-0.513996	6.99556	-3.74831	0.00105371	0.00687192	-1.73179
29946	SERTAD3	19q13.2	0.474516	5.72806	3.74455	0.00106351	0.00693133	-1.52096
55596	ZCCHC8	12q24.31	-0.568542	4.90766	-3.74053	0.00107408	0.00698974	-1.34627
55357	TBC1D2	9q22.33	0.863665	3.96408	3.74044	0.00107431	0.00698974	-0.996431
10535	RNASEH2A	19p13.13	-0.884675	3.82101	-3.74036	0.00107455	0.00698974	-1.21636
23254	KAZN	1p36.21	0.558113	4.66526	3.7382	0.00108027	0.00702023	-1.33848
57617	VPS18	15q15.1	0.670278	4.88793	3.73806	0.00108062	0.00702023	-1.36323
401474	SAMD12	8q24.11-q24.12	1.15569	2.8088	3.73721	0.00108289	0.00703043	-0.929217
54414	SIAE	11q24.2	0.449355	5.71589	3.73418	0.001091	0.00707851	-1.56531
51805	COQ3	6q16.2	-0.99813	3.50378	-3.73377	0.00109211	0.00708121	-1.04437
84154	RPF2	6q21	-0.492761	4.83151	-3.73229	0.00109609	0.00710241	-1.48514
387066	SNHG5	6q14.3	-0.542915	5.30723	-3.72957	0.00110345	0.00714552	-1.56203
26986	PABPC1	8q22.3	-0.309524	11.5863	-3.7293	0.00110418	0.00714572	-2.06001
340526	RTL5	Xq13.1	1.37874	2.75763	3.72705	0.00111031	0.00718079	-0.78772
135112	NCOA7	6q22.31-q22.32	-0.954286	3.92726	-3.72434	0.00111774	0.00722419	-1.08862
57530	CGN	1q21.3	-0.329239	7.62584	-3.72279	0.001122	0.00724706	-1.84044
124454	EARS2	16p12.2	0.421779	6.00189	3.72243	0.001123	0.00724893	-1.65787
10943	MSL3	Xp22.2	0.628029	4.42394	3.72157	0.00112537	0.00725956	-1.30183
753	LDLRAD4	18p11.21	0.660439	5.59467	3.71996	0.00112983	0.00727966	-1.36645
51074	APIP	11p13	-0.576004	4.88799	-3.71993	0.00112993	0.00727966	-1.46026
81889	FAHD1	16p13.3	0.578815	5.59399	3.71826	0.00113456	0.00730489	-1.57607
79993	ELOVL7	5q12.1	-0.680888	5.10247	-3.7175	0.0011367	0.00730973	-1.43778
3488	IGFBP5	2q35	0.604712	6.36458	3.71743	0.00113688	0.00730973	-1.78137
10426	TUBGCP3	13q34	-0.542752	4.58649	-3.71722	0.00113749	0.00730973	-1.39548
9728	SECISBP2L	15q21.1	0.476597	5.85988	3.71685	0.00113851	0.00731166	-1.60859
191	AHCY	20q11.22	-0.348899	8.26749	-3.71627	0.00114014	0.00731748	-1.94704
1488	CTBP2	10q26.13	-0.401312	7.17259	-3.7149	0.00114398	0.00733743	-1.82469
9656	MDC1	6p21.33	-0.535665	5.809	-3.71384	0.00114698	0.00735203	-1.67057
3609	ILF3	19p13.2	-0.325455	8.5713	-3.71235	0.00115117	0.00737421	-1.97076
7873	MANF	3p21.2	-0.522359	5.72405	-3.71051	0.0011564	0.00740272	-1.69279
5898	RALA	7p14.1	-0.425702	6.51694	-3.70987	0.00115821	0.00740272	-1.75574
137682	NDUFAF6	8q22.1	0.477054	5.48852	3.70977	0.0011585	0.00740272	-1.5523
11322	TMC6	17q25.3	0.672061	4.49796	3.70975	0.00115855	0.00740272	-1.36744
23265	EXOC7	17q25.1	0.379944	7.04482	3.70939	0.00115957	0.00740456	-1.81949
9527	GOSR1	17q11.2	-0.516218	5.3906	-3.70895	0.00116084	0.00740796	-1.5574
55148	UBR7	14q32.12	-0.449728	6.10465	-3.70844	0.00116229	0.00741252	-1.67187
527	ATP6V0C	16p13.3	0.388563	7.34877	3.70552	0.00117066	0.00746118	-1.88014
79602	ADIPOR2	12p13.33	0.374977	8.15878	3.70513	0.00117179	0.00746371	-1.94942
83939	EIF2A	3q25.1	-0.364904	7.06067	-3.70465	0.00117316	0.00746771	-1.86457
284129	SLC26A11	17q25.3	0.63791	4.77499	3.7032	0.00117737	0.00748978	-1.39144
127687	C1orf122	1p34.3	0.61816	5.1467	3.70231	0.00117994	0.00749785	-1.5355
112399	EGLN3	14q13.1	1.68664	3.38255	3.70225	0.00118012	0.00749785	-0.888365
3735	KARS	16q23.1	-0.29897	7.84465	-3.70122	0.0011831	0.00750399	-1.96408
55193	PBRM1	3p21.1	-0.492139	5.77512	-3.70121	0.00118314	0.00750399	-1.64464
81932	HDHD3	9q32	0.538826	5.00911	3.70115	0.00118332	0.00750399	-1.47509
727910	TLCD2	17p13.3	0.970328	3.22459	3.69586	0.00119879	0.00759736	-1.12015
6809	STX3	11q12.1	0.430403	6.57361	3.69345	0.0012059	0.00763764	-1.81034
130576	LYPD6B	2q23.2	-0.4962	5.21061	-3.69265	0.00120828	0.0076479	-1.54741
5296	PIK3R2	19p13.11	0.36092	7.34629	3.69115	0.00121273	0.00767124	-1.89385
1112	FOXN3	14q31.3-q32.11	-0.684928	5.68834	-3.68904	0.00121903	0.00770629	-1.63618
51069	MRPL2	6p21.1	-0.523849	4.84165	-3.68844	0.00122082	0.00770969	-1.50624
10093	ARPC4	3p25.3	0.400354	6.77489	3.68835	0.0012211	0.00770969	-1.84101
8682	PEA15	1q23.2	0.451812	6.55179	3.68627	0.00122737	0.00774447	-1.79997
8833	GMPS	3q25.31	-0.354047	7.55707	-3.68472	0.00123205	0.00776911	-1.97135
7633	ZNF79	9q33.3	0.868093	3.53544	3.68309	0.001237	0.00779546	-1.16648
23380	SRGAP2	1q32.1	-0.436892	6.20361	-3.68273	0.00123808	0.00779746	-1.75254
392	ARHGAP1	11p11.2	-0.420334	6.74133	-3.68214	0.00123986	0.00779928	-1.84692
6272	SORT1	1p13.3	-0.309271	8.12983	-3.68196	0.00124043	0.00779928	-2.01326
10567	RABAC1	19q13.2	0.582587	4.94229	3.68187	0.00124069	0.00779928	-1.47453
9837	GINS1	20p11.21	-0.659398	4.22996	-3.68087	0.00124374	0.00781357	-1.52432
55924	FAM212B	1p13.2	0.862581	4.23655	3.68	0.0012464	0.00782544	-1.36187
54662	TBC1D13	9q34.11	0.569214	5.10333	3.67923	0.00124875	0.00783534	-1.54652
54663	WDR74	11q12.3	-0.508232	5.31363	-3.67786	0.00125297	0.00785689	-1.66633
2491	CENPI	Xq22.1	-1.54038	1.70589	-3.67754	0.00125395	0.00785818	-1.05355
23363	OBSL1	2q35	0.45263	7.45931	3.67673	0.00125645	0.00786898	-1.94435
2992	GYG1	3q24	0.405415	6.58548	3.67456	0.00126316	0.00790609	-1.83226
50488	MINK1	17p13.2	0.389094	6.4136	3.67266	0.00126908	0.00793555	-1.81741
10742	RAI2	Xp22.13	1.97245	2.31657	3.67254	0.00126944	0.00793555	-0.881528
26263	FBXO22	15q24.2	0.473916	5.49791	3.67086	0.00127468	0.00796341	-1.69566
2674	GFRA1	10q25.3	0.373677	7.539	3.66801	0.00128363	0.00801434	-2.08109
9124	PDLIM1	10q23.33	0.476201	6.00875	3.66738	0.00128561	0.00802174	-1.71409
157657	C8orf37	8q22.1	-1.03167	2.87631	-3.66582	0.00129056	0.00804768	-1.09829
60685	ZFAND3	6p21.2	0.371425	7.3612	3.66515	0.00129267	0.00805584	-1.96668
1388	ATF6B	6p21.32	-0.360807	7.41182	-3.66477	0.00129387	0.00805835	-1.99205
65010	SLC26A6	3p21.31	0.732299	4.20008	3.6633	0.00129855	0.00808255	-1.34193
9968	MED12	Xq13.1	-0.413214	6.09102	-3.66282	0.00130009	0.00808416	-1.79838
9262	STK17B	2q32.3	-1.26515	2.84119	-3.66272	0.00130041	0.00808416	-1.06479
283638	CEP170B	14q32.33	0.530678	6.11956	3.66026	0.00130829	0.00812423	-1.76617
79048	SECISBP2	9q22.2	-0.387621	6.61514	-3.6602	0.00130847	0.00812423	-1.90409
219	ALDH1B1	9p13.1	0.600019	4.30735	3.65841	0.00131421	0.00815321	-1.5159
55151	TMEM38B	9q31.2	-0.625376	3.86268	-3.65825	0.00131475	0.00815321	-1.458
139231	FAM199X	Xq22.2	0.470003	6.87221	3.65769	0.00131653	0.00815927	-1.91989
221178	SPATA13	13q12.12	0.563922	5.77103	3.65685	0.00131926	0.00817114	-1.75469
7048	TGFBR2	3p24.1	0.638769	5.21393	3.65645	0.00132055	0.00817382	-1.5735
54834	GDAP2	1p12	0.482892	5.10261	3.65622	0.00132131	0.00817382	-1.63747
112942	CFAP36	2p16.1	0.458048	6.04103	3.65382	0.00132909	0.00821692	-1.83173
10979	FERMT2	14q22.1	-0.627107	4.7142	-3.65317	0.00133123	0.00822516	-1.47061
678	ZFP36L2	2p21	0.590177	8.80998	3.65263	0.00133298	0.00823091	-2.09514
55222	LRRC20	10q22.1	0.73993	3.41333	3.65161	0.00133634	0.00824661	-1.29469
57414	RHBDD2	7q11.23	0.497015	6.23223	3.65108	0.00133805	0.00825213	-1.83579
4603	MYBL1	8q13.1	-1.18136	1.38857	-3.64833	0.00134711	0.00830292	-1.14142
376267	RAB15	14q23.3	-0.389782	6.67221	-3.64787	0.00134864	0.00830729	-1.9046
284695	ZNF326	1p22.2	0.947567	3.69017	3.64649	0.00135321	0.00832899	-1.25368
9117	SEC22C	3p22.1	-0.535315	4.83636	-3.64631	0.00135381	0.00832899	-1.57247
517	ATP5MC2	12q13.13	-0.320725	8.01656	-3.64511	0.0013578	0.00834843	-2.09714
30	ACAA1	3p22.2	0.438653	6.34441	3.64428	0.00136055	0.00836029	-1.86171
10428	CFDP1	16q23.1	-0.442233	6.78227	-3.63922	0.00137755	0.0084596	-1.9805
4756	NEO1	15q24.1	-0.371638	7.33515	-3.63805	0.00138148	0.00847858	-2.02551
3475	IFRD1	7q31.1	-0.778486	3.76514	-3.63732	0.00138396	0.00848862	-1.38207
84681	HINT2	9p13.3	-0.794706	3.74763	-3.63591	0.00138877	0.00851296	-1.35992
9811	CTIF	18q21.1	-0.634433	4.63445	-3.63507	0.00139161	0.00852518	-1.52691
440915	POTEKP	2q21.1	1.41813	2.11636	3.634	0.00139528	0.00854252	-1.03689
55129	ANO10	3p22.1-p21.33	0.509242	5.28795	3.63185	0.00140264	0.00858233	-1.71145
729438	CASTOR2	7q11.23	0.561418	5.16415	3.63082	0.00140619	0.00859537	-1.67569
987	LRBA	4q31.3	0.356853	8.37813	3.63074	0.00140647	0.00859537	-2.13373
124222	PAQR4	16p13.3	-0.521295	4.87623	-3.62893	0.00141271	0.00862526	-1.69446
182	JAG1	20p12.2	0.644734	4.92775	3.62883	0.00141307	0.00862526	-1.58353
51473	DCDC2	6p22.3	0.865099	5.61361	3.62834	0.00141475	0.00862762	-1.77527
10066	SCAMP2	15q24.1	0.378211	6.78254	3.62822	0.00141516	0.00862762	-1.96918
84572	GNPTG	16p13.3	0.460744	6.10328	3.62752	0.0014176	0.00863726	-1.87026
1384	CRAT	9q34.11	-1.01375	3.28395	-3.62521	0.00142565	0.00868109	-1.29437
79872	CBLL1	7q22.3	-0.516009	4.93337	-3.62453	0.00142802	0.00869025	-1.67188
6875	TAF4B	18q11.2	-0.830967	3.14075	-3.623	0.00143338	0.00871763	-1.3195
440270	GOLGA8B	15q14	1.0072	3.71338	3.62077	0.00144125	0.00875875	-1.25453
221079	ARL5B	10p12.31	-0.45821	6.11249	-3.62059	0.00144187	0.00875875	-1.93998
55038	CDCA4	14q32.33	-0.59419	4.3846	-3.62003	0.00144385	0.00876175	-1.60184
4254	KITLG	12q21.32	0.396253	7.93938	3.61996	0.0014441	0.00876175	-2.13031
55330	BLOC1S4	4p16.1	0.597213	4.8211	3.61876	0.00144834	0.00878218	-1.64675
133686	NADK2	5p13.2	-0.523956	5.39596	-3.61643	0.00145663	0.00882718	-1.79921
100131801	PET100	19p13.2	0.60372	5.12247	3.61449	0.00146356	0.00885872	-1.71481
64410	KLHL25	15q25.3	0.86337	3.71688	3.61448	0.00146359	0.00885872	-1.30561
11258	DCTN3	9p13.3	-0.506601	4.98407	-3.61405	0.00146515	0.00886283	-1.68862
7482	WNT2B	1p13.2	-1.33158	2.90898	-3.61285	0.00146945	0.00888354	-1.13615
9670	IPO13	1p34.1	0.560977	4.99366	3.61095	0.0014763	0.00891468	-1.70065
10425	ARIH2	3p21.31	-0.396953	6.03536	-3.61092	0.0014764	0.00891468	-1.93515
79001	VKORC1	16p11.2	-0.488382	5.60863	-3.61069	0.00147725	0.00891468	-1.89691
4488	MSX2	5q35.2	0.538279	6.03365	3.60674	0.00149159	0.00899585	-1.91277
10627	MYL12A	18p11.31	0.308512	9.39581	3.60571	0.00149536	0.00901322	-2.25052
22847	ZNF507	19q13.11	-0.484234	5.01237	-3.60397	0.00150173	0.00904091	-1.74437
26284	ERAL1	17q11.2	-0.484097	5.7987	-3.60397	0.00150175	0.00904091	-1.8946
4697	NDUFA4	7p21.3	0.352457	7.43241	3.60232	0.00150781	0.00907203	-2.1575
140809	SRXN1	20p13	0.389255	6.35462	3.60199	0.00150904	0.009074	-1.99951
3984	LIMK1	7q11.23	0.622389	4.95294	3.60108	0.00151242	0.00908889	-1.72382
5757	PTMA	2q37.1	-0.338239	10.1383	-3.60028	0.00151536	0.00909666	-2.31373
84340	GFM2	5q13.3	0.401214	5.76461	3.60021	0.00151561	0.00909666	-1.93168
8896	BUD31	7q22.1	-0.427029	5.898	-3.6	0.00151641	0.00909666	-1.92327
1364	CLDN4	7q11.23	0.334106	8.04708	3.59921	0.00151932	0.00910612	-2.18733
5985	RFC5	12q24.23	-0.508622	4.90969	-3.59909	0.00151979	0.00910612	-1.77876
5578	PRKCA	17q24.2	0.817309	4.03639	3.59882	0.00152077	0.00910659	-1.47253
219844	HYLS1	11q24.2	-0.766023	3.65356	-3.59709	0.00152723	0.00913612	-1.47476
51199	NIN	14q22.1	0.48218	6.2583	3.59702	0.00152751	0.00913612	-1.97058
4695	NDUFA2	5q31.3	0.502147	5.64599	3.5963	0.00153017	0.00914655	-1.87173
161394	SAMD15	14q24.3	1.08007	2.91989	3.59607	0.00153106	0.00914655	-1.24312
2990	GUSB	7q11.21	0.339297	7.53618	3.59536	0.00153371	0.00915174	-2.17366
56674	TMEM9B	11p15.4	0.482193	5.16316	3.59535	0.00153374	0.00915174	-1.75953
84993	UBL7	15q24.1	0.486703	5.07646	3.59446	0.00153709	0.00916626	-1.76522
27238	GPKOW	Xp11.23	-0.482103	5.04675	-3.59262	0.00154402	0.00919781	-1.7739
55846	ITFG2	12p13.33	-0.732239	3.93303	-3.59257	0.0015442	0.00919781	-1.47096
26262	TSPAN17	5q35.2	0.438553	6.11262	3.59095	0.00155033	0.00922042	-1.96531
7390	UROS	10q26.2	0.450104	5.53354	3.59094	0.00155039	0.00922042	-1.86682
5357	PLS1	3q23	0.449286	5.76897	3.59085	0.00155073	0.00922042	-1.89553
3959	LGALS3BP	17q25.3	0.497765	5.65296	3.58908	0.00155747	0.00925305	-1.92728
91012	CERS5	12q13.12	0.500847	5.16993	3.58892	0.00155805	0.00925305	-1.80234
100507321	ERVK13-1	16p13.3	0.919899	4.14875	3.58786	0.00156212	0.00927177	-1.48412
55182	RNF220	1p34.1	-0.466478	5.70367	-3.58383	0.00157755	0.00935275	-1.91166
28956	LAMTOR2	1q22	0.409482	5.92628	3.58382	0.00157762	0.00935275	-1.98597
23107	MRPS27	5q13.2	-0.352048	6.38689	-3.58335	0.00157941	0.00935792	-2.06892
2289	FKBP5	6p21.31	-0.471999	5.69666	-3.582	0.00158465	0.00938071	-1.97955
58476	TP53INP2	20q11.22	1.29235	3.78117	3.58188	0.00158512	0.00938071	-1.28321
10953	TOMM34	20q13.12	0.480364	5.93995	3.58124	0.00158759	0.00938983	-1.9644
10042	HMGXB4	22q12.3	-0.465508	5.33795	-3.58005	0.00159221	0.00941163	-1.85549
144455	E2F7	12q21.2	-1.36558	2.23607	-3.57862	0.00159779	0.00943913	-1.28183
150290	DUSP18	22q12.2	1.12494	2.73798	3.5781	0.00159983	0.00944284	-1.24429
475	ATOX1	5q33.1	0.474963	5.55017	3.57798	0.00160029	0.00944284	-1.89341
4774	NFIA	1p31.3	-0.708137	4.14401	-3.57626	0.00160702	0.00947704	-1.62654
51465	UBE2J1	6q15	-0.356716	6.61177	-3.57511	0.00161155	0.0094982	-2.09138
284996	RNF149	2q11.2	-0.440189	5.64775	-3.57052	0.00162973	0.00959935	-1.9454
5029	P2RY2	11q13.4	0.60023	5.84664	3.5703	0.00163062	0.00959935	-1.97335
4292	MLH1	3p22.2	-0.485216	5.15257	-3.56936	0.00163434	0.00961474	-1.92127
57492	ARID1B	6q25.3	-0.464622	5.49917	-3.56917	0.00163513	0.00961474	-1.88927
7001	PRDX2	19p13.13	0.341844	7.78338	3.56501	0.00165182	0.00970719	-2.26945
159090	FAM122B	Xq26.3	0.419584	6.47822	3.56407	0.00165563	0.00972392	-2.10058
6197	RPS6KA3	Xp22.12	-0.615447	4.81614	-3.56364	0.00165737	0.0097255	-1.78829
9618	TRAF4	17q11.2	0.416903	6.9972	3.56352	0.00165782	0.0097255	-2.16623
51258	MRPL51	12p13.31	-0.343488	6.73252	-3.56229	0.00166283	0.00974923	-2.17123
647135	SRGAP2B	1q21.1	-0.828711	3.48994	-3.56072	0.00166922	0.00978102	-1.38006
79000	AUNIP	1p36.11	-1.02725	2.70085	-3.55957	0.0016739	0.00979996	-1.3453
90060	CCDC120	Xp11.23	0.474745	5.41706	3.55945	0.00167439	0.00979996	-1.8817
381	ARF5	7q32.1	-0.368064	6.6755	-3.55902	0.00167614	0.00980449	-2.13826
4494	MT1F	16q13	-1.00148	3.9762	-3.55703	0.0016843	0.00984655	-1.37329
85363	TRIM5	11p15.4	0.709198	3.80719	3.55562	0.00169013	0.00987129	-1.57463
64425	POLR1E	9p13.2	-0.796136	4.24483	-3.55553	0.00169049	0.00987129	-1.70012
51072	MEMO1	2p22.3	-0.469213	5.42652	-3.55459	0.00169439	0.00988836	-1.9396
57153	SLC44A2	19p13.2	-0.28888	8.47806	-3.55204	0.00170498	0.00994438	-2.32633
57522	SRGAP1	12q14.2	0.593049	5.06278	3.55083	0.00171003	0.00996808	-1.91831
5045	FURIN	15q26.1	-0.49174	6.49934	-3.54923	0.00171668	0.0100011	-2.07835
688	KLF5	13q22.1	-0.773774	3.64582	-3.5478	0.00172268	0.0100264	-1.48758
1490	CTGF	6q23.2	2.50011	2.66214	3.54773	0.001723	0.0100264	-1.14433
91369	ANKRD40	17q21.33	-0.436929	5.59656	-3.5432	0.00174213	0.0101262	-2.0324
9674	KIAA0040	1q25.1	-0.39535	5.46949	-3.54319	0.00174217	0.0101262	-2.07209
10318	TNIP1	5q33.1	0.410214	6.55402	3.54251	0.00174509	0.0101268	-2.16911
8439	NSMAF	8q12.1	-0.413184	5.4807	-3.54249	0.00174518	0.0101268	-1.97399
25894	PLEKHG4	16q22.1	-0.943674	3.62037	-3.54247	0.00174527	0.0101268	-1.47703
333926	PPM1J	1p13.2	0.64366	4.53617	3.54105	0.00175129	0.0101559	-1.89829
53339	BTBD1	15q25.2	0.381701	7.03788	3.54082	0.0017523	0.0101559	-2.23806
83892	KCTD10	12q24.11	0.422636	6.04349	3.54034	0.00175434	0.0101619	-2.08182
90007	MIDN	19p13.3	0.413955	7.08219	3.53983	0.00175654	0.0101688	-2.22241
10921	RNPS1	16p13.3	0.306167	7.68876	3.53824	0.00176336	0.0102022	-2.3256
2810	SFN	1p36.11	0.499504	5.641	3.53796	0.00176458	0.0102022	-2.05485
8975	USP13	3q26.33	-0.392965	6.14014	-3.53778	0.00176534	0.0102022	-2.11953
27034	ACAD8	11q25	0.428273	5.38227	3.53587	0.00177359	0.0102441	-2.00407
286262	TPRN	9q34.3	0.559378	4.74849	3.53516	0.00177665	0.0102558	-1.76983
999	CDH1	16q22.1	0.241503	11.6836	3.53042	0.0017973	0.0103691	-2.54363
3708	ITPR1	3p26.1	0.616737	4.63897	3.52967	0.00180061	0.0103823	-1.82243
347734	SLC35B2	6p21.1	0.372646	7.25459	3.5285	0.00180572	0.0104058	-2.29852
6599	SMARCC1	3p21.31	-0.324035	7.57671	-3.52669	0.00181374	0.0104427	-2.3469
60526	LDAH	2p24.1	0.485348	5.11165	3.52658	0.00181419	0.0104427	-1.93922
54935	DUSP23	1q23.2	0.605892	4.0888	3.52386	0.00182628	0.0105063	-1.70776
80139	ZNF703	8p11.23	-0.451046	6.50299	-3.52136	0.00183742	0.0105644	-2.29912
25809	TTLL1	22q13.2	-0.79233	3.50906	-3.51956	0.00184553	0.010605	-1.57706
4154	MBNL1	3q25.1-q25.2	-0.445871	5.93123	-3.51902	0.00184794	0.0106081	-2.13498
7381	UQCRB	8q22.1	0.384812	8.188	3.51875	0.00184918	0.0106081	-2.41226
51029	DESI2	1q44	-0.549052	4.5137	-3.51874	0.00184923	0.0106081	-1.82643
6879	TAF7	5q31.3	0.341718	8.12648	3.51808	0.00185218	0.0106168	-2.40416
4174	MCM5	22q12.3	-0.653709	4.38583	-3.51793	0.00185285	0.0106168	-1.91203
8772	FADD	11q13.3	0.475868	5.13619	3.51589	0.00186211	0.0106639	-1.98114
11188	NISCH	3p21.1	-0.462565	6.01638	-3.51427	0.00186944	0.0106998	-2.13473
3988	LIPA	10q23.31	0.43732	6.02368	3.51393	0.00187102	0.0107027	-2.14536
57234	LINC00869	1q21.2	-0.730912	3.77384	-3.51184	0.00188055	0.0107512	-1.59466
10286	BCAS2	1p13.2	-0.330713	8.28041	-3.51034	0.00188743	0.0107797	-2.43858
7262	PHLDA2	11p15.4	0.665796	4.32559	3.51013	0.00188842	0.0107797	-1.77508
54853	WDR55	5q31.3	0.462121	5.20033	3.50984	0.00188973	0.0107797	-2.01288
5966	REL	2p16.1	-0.672273	4.68186	-3.50982	0.00188981	0.0107797	-1.82565
6445	SGCG	13q12.12	0.383938	7.25752	3.50943	0.00189164	0.010784	-2.33767
1763	DNA2	10q21.3	-1.63227	2.83139	-3.50342	0.00191953	0.0109369	-1.42652
55871	CBWD1	9p24.3	0.582541	4.87011	3.50303	0.00192135	0.0109411	-1.93148
831	CAST	5q15	0.412171	6.3277	3.50096	0.00193103	0.01099	-2.21612
26118	WSB1	17q11.1	0.34917	7.15783	3.50064	0.00193257	0.0109926	-2.37259
84314	TMEM107	17p13.1	-0.813253	3.08936	-3.49826	0.00194377	0.0110448	-1.57061
129787	TMEM18	2p25.3	-0.443772	5.70589	-3.49823	0.00194394	0.0110448	-2.13711
2677	GGCX	2p11.2	0.36354	6.24217	3.49789	0.00194552	0.0110476	-2.21364
347	APOD	3q29	1.8125	2.64662	3.49753	0.00194721	0.011051	-1.26294
1642	DDB1	11q12.2	0.275608	9.32573	3.49713	0.00194912	0.0110556	-2.51985
9895	TECPR2	14q32.31	0.525185	4.72357	3.49503	0.0019591	0.011106	-1.87045
85004	RERG	12p12.3	0.641589	3.32192	3.49169	0.0019751	0.0111893	-1.86445
9975	NR1D2	3p24.2	-0.54214	6.66414	-3.4915	0.00197602	0.0111893	-2.2944
55627	SMPD4	2q21.1	-0.454896	6.05484	-3.4894	0.00198614	0.0112403	-2.23216
6654	SOS1	2p22.1	-0.442946	6.54815	-3.48897	0.00198823	0.0112413	-2.29472
80336	PABPC1L	20q13.12	-0.503103	6.19427	-3.48878	0.00198915	0.0112413	-2.28795
79646	PANK3	5q34	-0.379061	6.4008	-3.48868	0.00198965	0.0112413	-2.25279
23509	POFUT1	20q11.21	-0.449755	6.00118	-3.48817	0.00199211	0.0112489	-2.21621
4779	NFE2L1	17q21.32	-0.320621	8.228	-3.48728	0.00199639	0.0112668	-2.49197
1025	CDK9	9q34.11	0.553178	5.31253	3.48671	0.00199918	0.0112762	-2.04486
5432	POLR2C	16q21	0.335271	6.81559	3.48377	0.00201353	0.0113508	-2.3513
5613	PRKX	Xp22.33	0.464063	6.35205	3.48274	0.00201859	0.011373	-2.27454
55125	CEP192	18p11.21	-0.488904	5.87201	-3.48242	0.00202018	0.0113756	-2.20167
55690	PACS1	11q13.1-q13.2	0.320931	7.97021	3.48113	0.00202648	0.0114047	-2.45578
23438	HARS2	5q31.3	0.400969	5.68083	3.48061	0.00202904	0.0114128	-2.17305
30011	SH3KBP1	Xp22.12	-0.471911	5.55086	-3.47769	0.00204355	0.011488	-2.1328
55198	APPL2	12q23.3	-0.334508	6.79946	-3.47665	0.00204868	0.0115104	-2.35237
10130	PDIA6	2p25.1	-0.296198	8.82374	-3.47638	0.00205005	0.0115117	-2.55704
100506696	PCAT6	1q32.1	1.16367	2.76362	3.47554	0.00205424	0.0115289	-1.44379
84464	SLX4	16p13.3	-0.696408	4.56564	-3.47419	0.00206096	0.0115602	-1.94237
79962	DNAJC22	12q13.12	-0.367973	6.30475	-3.47397	0.00206211	0.0115602	-2.28955
9197	SLC33A1	3q25.31	-0.39901	6.04388	-3.4723	0.00207047	0.0116006	-2.27401
4035	LRP1	12q13.3	0.659833	4.53535	3.47195	0.00207223	0.011604	-1.9363
79829	NAA40	11q13.1	0.530323	5.80654	3.46894	0.00208743	0.0116827	-2.20646
705	BYSL	6p21.1	0.526316	4.50714	3.46866	0.00208889	0.0116844	-2.04252
3292	HSD17B1	17q21.2	0.929046	3.33755	3.4665	0.00209988	0.0117393	-1.55484
22889	KHDC4	1q22	-0.476854	5.74031	-3.46588	0.00210303	0.0117504	-2.2099
23096	IQSEC2	Xp11.22	0.640852	5.19599	3.46438	0.00211071	0.0117868	-2.01721
285367	RPUSD3	3p25.3	-0.436444	5.55885	-3.46257	0.00212003	0.0118323	-2.19139
6721	SREBF2	22q13.2	-0.321046	7.64397	-3.45761	0.0021457	0.0119634	-2.51819
79598	CEP97	3q12.3	-0.679128	3.73315	-3.45758	0.00214588	0.0119634	-1.82565
84929	FIBCD1	9q34.12	0.599662	5.0479	3.4564	0.00215202	0.011991	-2.10467
808	CALM3	19q13.32	-0.289657	8.29118	-3.45418	0.00216363	0.0120491	-2.572
578	BAK1	6p21.31	0.626502	6.58907	3.45356	0.00216691	0.0120607	-2.20814
23295	MGRN1	16p13.3	0.380015	6.81288	3.45285	0.00217067	0.0120749	-2.40173
746	TMEM258	11q12.2	-0.421377	6.17789	-3.45049	0.0021831	0.0121374	-2.33603
56681	SAR1A	10q22.1	0.321814	6.76447	3.45013	0.00218503	0.0121415	-2.43497
80772	CPTP	1p36.33	0.714805	4.20253	3.44786	0.0021971	0.0122018	-1.84654
55276	PGM2	4p14	0.41247	5.5433	3.44697	0.00220184	0.0122214	-2.23032
4214	MAP3K1	5q11.2	0.43518	5.51634	3.44625	0.00220569	0.012236	-2.24535
80154	GOLGA2P10	15q25.2	-0.72438	3.8977	-3.44525	0.00221108	0.0122592	-1.80468
8263	F8A1	Xq28	0.57628	4.84109	3.44338	0.00222111	0.0123081	-1.99515
7884	SLBP	4p16.3	-0.508459	5.1799	-3.44292	0.00222363	0.0123153	-2.18148
114049	BUD23	7q11.23	-0.408785	6.09654	-3.44156	0.00223096	0.0123491	-2.38632
55209	SETD5	3p25.3	-0.282481	8.07622	-3.43984	0.00224027	0.0123939	-2.58887
83451	ABHD11	7q11.23	0.470507	6.91117	3.43777	0.00225157	0.0124496	-2.45835
221504	ZBTB9	6p21.32	0.550317	5.03269	3.4362	0.00226013	0.01249	-2.06106
84245	MRI1	19p13.13	0.562514	4.7187	3.4355	0.00226398	0.0124985	-2.02439
11138	TBC1D8	2q11.2	-0.509709	5.24379	-3.4354	0.00226456	0.0124985	-2.15208
9810	RNF40	16p11.2	-0.319053	7.36361	-3.43525	0.00226538	0.0124985	-2.51961
7371	UCK2	1q24.1	-0.405578	5.66841	-3.4341	0.00227168	0.0125265	-2.34637
5641	LGMN	14q32.12	0.418812	5.45404	3.4305	0.0022916	0.0126294	-2.25535
821	CANX	5q35.3	-0.276867	10.7756	-3.42993	0.00229479	0.0126401	-2.75499
403	ARL3	10q24.32	0.392746	5.62927	3.42882	0.00230099	0.0126674	-2.36601
9733	SART3	12q23.3	-0.350662	6.53117	-3.42667	0.00231302	0.0127266	-2.45596
23328	SASH1	6q24.3-q25.1	0.539849	5.96581	3.42548	0.00231965	0.0127562	-2.28407
200734	SPRED2	2p14	-0.399973	6.58589	-3.42449	0.00232522	0.0127754	-2.42128
23015	GOLGA8A	15q14	0.733348	4.52599	3.42441	0.00232567	0.0127754	-1.95191
23165	NUP205	7q33	-0.391357	6.69401	-3.42415	0.00232717	0.0127767	-2.50539
284325	C19orf54	19q13.2	-0.592293	4.25436	-3.42347	0.00233102	0.0127908	-1.97497
9861	PSMD6	3p14.1	0.253264	10.6035	3.42247	0.00233663	0.0128147	-2.75579
2036	EPB41L1	20q11.23	0.378449	6.01012	3.42205	0.00233907	0.0128174	-2.37208
1613	DAPK3	19p13.3	0.472587	5.367	3.42194	0.00233966	0.0128174	-2.17195
387882	C12orf75	12q23.3	0.394131	5.23254	3.42114	0.00234418	0.0128352	-2.34795
27198	HCAR1	12q24.31	-0.824489	4.14223	-3.42025	0.00234926	0.012856	-1.80559
84925	DIRC2	3q21.1	0.597328	4.4388	3.41971	0.00235235	0.012866	-1.96278
51514	DTL	1q32.3	-1.25556	1.74514	-3.41912	0.00235569	0.0128772	-1.69367
7469	NELFA	4p16.3	-0.444091	5.4299	-3.41885	0.00235725	0.0128788	-2.2539
10519	CIB1	15q26.1	0.373686	6.75338	3.41625	0.00237216	0.0129532	-2.47222
54780	NSMCE4A	10q26.13	-0.527323	5.49703	-3.41484	0.00238024	0.0129904	-2.2466
10681	GNB5	15q21.2	0.372823	6.28015	3.41398	0.00238525	0.0130074	-2.41251
80028	FBXL18	7p22.1	0.481589	5.80216	3.41386	0.00238594	0.0130074	-2.25318
6164	RPL34	4q25	0.380689	8.41724	3.41344	0.00238835	0.0130135	-2.67652
28227	PPP2R3B	Xp22.33	-0.664555	4.15813	-3.41277	0.00239225	0.0130278	-1.94713
28955	DEXI	16p13.13	0.509431	4.66593	3.4118	0.00239783	0.0130511	-2.10264
1212	CLTB	5q35.2	0.447525	6.04245	3.41099	0.00240254	0.0130697	-2.37116
9554	SEC22B	1p12	0.279648	8.31597	3.40801	0.00241997	0.0131575	-2.6775
55163	PNPO	17q21.32	0.338574	6.73919	3.40645	0.00242911	0.0132	-2.53253
9630	GNA14	9q21.2	0.977949	2.74537	3.40501	0.00243759	0.013239	-1.72711
271	AMPD2	1p13.3	0.438436	5.36427	3.40323	0.00244811	0.013289	-2.32179
54790	TET2	4q24	0.432391	5.87081	3.40226	0.0024539	0.0133133	-2.45174
84912	SLC35B4	7q33	0.603792	4.02463	3.39788	0.00248007	0.013448	-1.98631
140730	RIMS4	20q13.12	0.599515	4.73456	3.39674	0.00248687	0.0134776	-2.27074
11226	GALNT6	12q13.13	-0.357231	7.70539	-3.39544	0.00249471	0.0135129	-2.6641
2673	GFPT1	2p13.3	-0.297862	7.83552	-3.39496	0.00249761	0.0135213	-2.69101
2257	FGF12	3q28-q29	1.51728	2.49781	3.39396	0.0025037	0.0135471	-1.49415
1366	CLDN7	17p13.1	-0.348159	7.26412	-3.39263	0.00251176	0.0135834	-2.6354
8260	NAA10	Xq28	0.407417	6.31055	3.39038	0.00252544	0.0136501	-2.48928
56834	GPR137	11q13.1	0.556699	4.9825	3.38928	0.00253216	0.0136791	-2.14341
55577	NAGK	2p13.3	-0.420231	6.26467	-3.38882	0.00253503	0.0136872	-2.486
27089	UQCRQ	5q31.1	0.3915	6.29849	3.38832	0.00253805	0.0136962	-2.50208
847	CAT	11p13	-0.350311	7.40074	-3.38771	0.00254179	0.0137091	-2.64594
23406	COTL1	16q24.1	0.481434	5.60239	3.38679	0.00254748	0.0137324	-2.36136
4790	NFKB1	4q24	-0.567249	5.64245	-3.3844	0.00256225	0.0138047	-2.36828
805	CALM2	2p21	-0.321506	9.09634	-3.38401	0.00256466	0.0138103	-2.78246
8629	JRK	8q24.3	-0.464171	5.32507	-3.38273	0.00257262	0.0138452	-2.25435
57719	ANO8	19p13.11	-0.749755	4.27967	-3.38252	0.00257388	0.0138452	-2.02926
55852	TEX2	17q23.3	0.383317	6.77467	3.38128	0.00258166	0.0138797	-2.59129
51379	CRLF3	17q11.2	-1.01619	2.73762	-3.38096	0.00258367	0.0138831	-1.68935
11230	PRAF2	Xp11.23	0.554336	4.67044	3.37993	0.0025901	0.0139092	-2.19389
5365	PLXNB3	Xq28	0.646495	4.67539	3.37974	0.00259127	0.0139092	-2.16685
10213	PSMD14	2q24.2	-0.334967	6.76962	-3.37943	0.00259324	0.0139123	-2.62142
9057	SLC7A6	16q22.1	0.461323	6.06766	3.3782	0.00260095	0.0139463	-2.46721
65250	CPLANE1	5p13.2	0.809825	4.35996	3.37689	0.00260917	0.0139829	-1.92605
55315	SLC29A3	10q22.1	0.603765	4.01815	3.37608	0.00261426	0.0140027	-2.0012
10229	COQ7	16p12.3	-0.493962	5.13059	-3.37587	0.00261563	0.0140027	-2.28233
26225	ARL5A	2q23.3	0.500147	5.20389	3.3736	0.00262999	0.0140721	-2.32818
90411	MCFD2	2p21	-0.317551	7.8227	-3.37217	0.00263908	0.0141133	-2.7341
6993	DYNLT1	6q25.3	0.408075	6.47398	3.36577	0.00268023	0.0143258	-2.58297
90990	KIFC2	8q24.3	0.881578	6.65013	3.36399	0.00269175	0.0143797	-2.54659
114915	EPB41L4A-AS1	5q22.1	-0.618434	4.37183	-3.36235	0.00270243	0.0144291	-2.14829
151613	TTC14	3q26.33	0.441654	5.54855	3.36156	0.00270759	0.0144388	-2.41669
3185	HNRNPF	10q11.21	-0.274407	8.62906	-3.36153	0.00270781	0.0144388	-2.80688
222962	SLC29A4	7p22.1	0.993967	3.31018	3.36142	0.00270853	0.0144388	-1.83912
283991	UBALD2	17q25.1	-0.626936	4.42034	-3.35955	0.00272079	0.0144943	-2.06856
51496	CTDSPL2	15q15.3-q21.1	-0.598757	4.58234	-3.35922	0.00272292	0.0144943	-2.19963
123720	WHAMM	15q25.2	0.539142	4.44851	3.35918	0.00272324	0.0144943	-2.16373
10497	UNC13B	9p13.3	0.480884	4.90432	3.3588	0.00272569	0.0144997	-2.31727
89845	ABCC10	6p21.1	0.56677	5.09437	3.35731	0.00273554	0.0145444	-2.32097
85437	ZCRB1	12q12	-0.364609	6.50982	-3.35658	0.00274036	0.0145624	-2.59914
3110	MNX1	7q36.3	-0.946827	2.84831	-3.35613	0.00274331	0.0145704	-1.74742
6632	SNRPD1	18q11.2	-0.427802	5.99268	-3.35484	0.00275192	0.0146085	-2.5739
23476	BRD4	19p13.12	-0.439528	5.69352	-3.35462	0.00275339	0.0146086	-2.4519
8717	TRADD	16q22.1	0.661856	4.22984	3.35414	0.00275657	0.0146178	-2.07506
5291	PIK3CB	3q22.3	0.349984	6.84812	3.35366	0.00275977	0.0146271	-2.6613
8045	RASSF7	11p15.5	0.774734	4.7393	3.35296	0.00276438	0.0146438	-2.15704
92565	FANK1	10q26.2	0.860602	3.24236	3.35266	0.00276638	0.0146467	-1.81651
8711	TNK1	17p13.1	0.67887	3.91957	3.35244	0.00276785	0.0146468	-2.03453
7411	VBP1	Xq28	-0.336091	6.31516	-3.35201	0.00277076	0.0146475	-2.61297
80198	MUS81	11q13.1	-0.556639	5.0652	-3.35199	0.00277088	0.0146475	-2.30429
9847	C2CD5	12p12.1	-0.416342	5.48666	-3.3509	0.00277819	0.0146785	-2.42984
7706	TRIM25	17q22	-0.283991	7.89696	-3.34988	0.00278504	0.014707	-2.78454
6597	SMARCA4	19p13.2	-0.281968	8.15014	-3.34964	0.00278663	0.0147077	-2.80474
54620	FBXL19	16p11.2	0.405429	5.37504	3.34898	0.00279111	0.0147237	-2.37884
51239	ANKRD39	2q11.2	0.672473	4.32451	3.34801	0.0027976	0.0147502	-2.17408
7023	TFAP4	16p13.3	-0.664216	3.80892	-3.34742	0.00280164	0.0147638	-2.13134
23583	SMUG1	12q13.13	0.503576	4.98336	3.34674	0.00280623	0.0147802	-2.30449
163	AP2B1	17q12	-0.260521	8.35179	-3.34598	0.00281133	0.0147982	-2.84156
79654	HECTD3	1p34.1	0.489235	5.26257	3.3458	0.00281256	0.0147982	-2.34527
157285	PRAG1	8p23.1	0.483473	5.07976	3.34349	0.00282831	0.0148733	-2.40804
6431	SRSF6	20q13.11	0.281556	8.29983	3.34314	0.00283065	0.0148779	-2.82615
65109	UPF3B	Xq24	-0.435533	5.38946	-3.34255	0.0028347	0.0148914	-2.47138
7107	GPR137B	1q42.3	0.550721	5.71883	3.34116	0.00284419	0.0149335	-2.46005
114876	OSBPL1A	18q11.2	0.421293	5.61222	3.33878	0.0028606	0.0150118	-2.47278
54587	MXRA8	1p36.33	1.26857	3.02097	3.33625	0.00287811	0.0150959	-1.74222
143888	KDELC2	11q22.3	-0.720298	4.55802	-3.33507	0.00288629	0.0151277	-2.11679
147965	FAM98C	19q13.2	-0.615088	4.24588	-3.33494	0.00288716	0.0151277	-2.14886
88745	RRP36	6p21.1	0.423877	6.01383	3.33459	0.00288963	0.015128	-2.56864
10189	ALYREF	17q25.3	-0.412117	5.57834	-3.3345	0.00289022	0.015128	-2.51515
4814	NINJ1	9q22.31	0.371002	6.98218	3.33161	0.00291044	0.0152259	-2.70057
10152	ABI2	2q33.2	-0.369647	6.57398	-3.33041	0.00291886	0.0152621	-2.68227
8816	DCAF5	14q24.1	0.364487	6.36836	3.32709	0.00294231	0.0153767	-2.62671
64094	SMOC2	6q27	0.853573	3.45044	3.32557	0.00295313	0.0154253	-1.98864
8819	SAP30	4q34.1	-1.0425	2.95442	-3.32497	0.00295735	0.0154263	-1.95345
4982	TNFRSF11B	8q24.12	1.15631	3.04504	3.32466	0.00295963	0.0154263	-1.71394
3858	KRT10	17q21.2	0.499669	4.74754	3.32462	0.00295988	0.0154263	-2.30074
2059	EPS8	12p12.3	-0.373412	6.32396	-3.32458	0.00296014	0.0154263	-2.62225
125170	MIEF2	17p11.2	0.813131	3.9836	3.32447	0.00296095	0.0154263	-2.03881
26586	CKAP2	13q14.3	-0.446433	6.42713	-3.32424	0.00296258	0.0154268	-2.67988
3068	HDGF	1q23.1	-0.298261	9.55215	-3.32106	0.00298533	0.0155373	-2.94755
1431	CS	12q13.3	-0.27532	7.79556	-3.32082	0.00298708	0.0155382	-2.86189
56135	PCDHAC1	5q31.3	1.91528	2.09792	3.32061	0.00298858	0.0155382	-1.60993
23060	ZNF609	15q22.31	-0.410982	6.60968	-3.32024	0.0029913	0.0155432	-2.6925
65062	TMEM237	2q33.1	-0.579066	4.1071	-3.32005	0.00299262	0.0155432	-2.21655
26012	NSMF	9q34.3	0.485912	6.26688	3.31695	0.00301502	0.0156515	-2.62761
57217	TTC7A	2p21	-0.409693	5.31287	-3.31617	0.00302073	0.015673	-2.51861
57621	ZBTB2	6q25.1	-0.402446	6.07751	-3.31563	0.00302462	0.0156852	-2.66219
9666	DZIP3	3q13.13	-0.508083	5.33699	-3.31518	0.00302794	0.0156898	-2.46887
84105	PCBD2	5q31.1	-0.555624	4.1551	-3.31492	0.00302984	0.0156898	-2.23732
29994	BAZ2B	2q24.2	-0.419967	5.58623	-3.31487	0.00303017	0.0156898	-2.51717
3675	ITGA3	17q21.33	0.36069	6.60997	3.31292	0.00304444	0.0157556	-2.69688
735301	SNHG9	16p13.3	0.504066	4.86995	3.31216	0.00305001	0.0157764	-2.44176
79023	NUP37	12q23.2	-0.390585	5.47596	-3.31099	0.00305863	0.0158129	-2.54713
51095	TRNT1	3p26.2	0.424626	5.21257	3.31076	0.00306032	0.0158135	-2.49227
26507	CNNM1	10q24.2	0.79751	3.42824	3.31043	0.00306276	0.015818	-1.98694
7465	WEE1	11p15.4	-0.513376	5.23889	-3.30989	0.00306673	0.0158304	-2.4633
56931	DUS3L	19p13.3	-0.76116	3.30211	-3.3075	0.00308441	0.0159135	-2.00249
3726	JUNB	19p13.13	0.491777	6.29987	3.30719	0.00308671	0.0159173	-2.60769
26277	TINF2	14q12	0.368007	6.10358	3.30474	0.00310494	0.0159961	-2.66115
55337	C19orf66	19p13.2	0.744965	3.78098	3.30471	0.00310517	0.0159961	-2.02216
22834	ZNF652	17q21.32-q21.33	0.38015	6.42242	3.30435	0.0031079	0.016002	-2.68143
5606	MAP2K3	17p11.2	0.427637	5.24416	3.30396	0.00311078	0.0160087	-2.48342
56996	SLC12A9	7q22.1	0.632469	5.06484	3.30254	0.00312141	0.016053	-2.41767
26751	SH3YL1	2p25.3	0.538208	6.71422	3.30239	0.00312256	0.016053	-2.70117
100506753	AZIN1-AS1	8q22.3	-0.952947	2.5306	-3.30135	0.00313035	0.0160711	-1.88275
55153	SDAD1	4q21.1	-0.377197	5.70254	-3.30133	0.00313053	0.0160711	-2.6176
23019	CNOT1	16q21	-0.317596	8.56244	-3.30129	0.00313085	0.0160711	-2.94473
2355	FOSL2	2p23.2	0.385749	6.08673	3.30091	0.00313368	0.0160774	-2.72264
171568	POLR3H	22q13.2	0.402706	5.5147	3.30015	0.00313944	0.0160988	-2.57779
11143	KAT7	17q21.33	-0.378011	6.22287	-3.29903	0.00314785	0.0161337	-2.66956
55743	CHFR	12q24.33	0.493979	5.08136	3.29781	0.00315715	0.0161732	-2.39392
51360	MBTPS2	Xp22.12	-0.460163	5.45504	-3.29404	0.00318586	0.016312	-2.58135
26009	ZZZ3	1p31.1	-0.371471	6.43937	-3.29294	0.00319431	0.016347	-2.73075
1870	E2F2	1p36.12	-0.869699	2.84556	-3.29255	0.00319727	0.0163538	-2.09553
203	AK1	9q34.11	0.708217	3.89351	3.29101	0.00320917	0.0164034	-2.15947
1495	CTNNA1	5q31.2	-0.257928	9.34079	-3.29066	0.00321181	0.0164034	-3.00241
7357	UGCG	9q31.3	0.396389	5.41491	3.29066	0.00321183	0.0164034	-2.65524
9696	CROCC	1p36.13	-0.530243	4.77946	-3.28922	0.00322297	0.016452	-2.38318
4084	MXD1	2p13.3	0.678704	4.15095	3.28841	0.00322927	0.0164758	-2.22868
441376	AARD	8q24.11	-1.08643	4.61553	-3.28795	0.00323286	0.0164804	-2.54139
164832	LONRF2	2q11.2	0.421418	6.80097	3.28787	0.00323343	0.0164804	-2.86248
1846	DUSP4	8p12	0.451815	5.86207	3.28717	0.00323887	0.0164978	-2.66358
5879	RAC1	7p22.1	-0.278786	8.9422	-3.28701	0.00324011	0.0164978	-2.99079
112812	FDX1L	19p13.2	0.685198	3.69194	3.28511	0.00325499	0.0165652	-2.15912
10013	HDAC6	Xp11.23	-0.394764	6.01346	-3.28465	0.00325853	0.0165748	-2.71149
23245	ASTN2	9q33.1	0.52305	4.93478	3.28153	0.00328303	0.016691	-2.3985
387103	CENPW	6q22.32	-1.25855	1.66037	-3.28132	0.00328475	0.016691	-1.94905
64863	METTL4	18p11.32	-0.678253	3.8892	-3.28112	0.00328632	0.016691	-2.25043
54897	CASZ1	1p36.22	-0.486284	5.14548	-3.2805	0.00329121	0.0167074	-2.49937
111	ADCY5	3q21.1	0.701767	5.34174	3.27837	0.00330809	0.016781	-2.40405
23404	EXOSC2	9q34.12	-0.410403	4.80551	-3.27825	0.00330902	0.016781	-2.53009
4719	NDUFS1	2q33.3	-0.283244	7.27391	-3.27757	0.00331441	0.0167999	-2.91604
740	MRPL49	11q13.1	0.287662	7.12329	3.2762	0.00332537	0.0168411	-2.8933
4430	MYO1B	2q32.3	0.446739	8.27928	3.27613	0.00332587	0.0168411	-2.91966
53371	NUP54	4q21.1	-0.483093	5.29932	-3.27573	0.00332906	0.0168488	-2.56678
143279	HECTD2	10q23.32	-0.751821	3.80525	-3.27499	0.00333502	0.0168705	-2.16827
162073	ITPRIPL2	16p12.3	-0.739095	5.31458	-3.27457	0.00333838	0.0168727	-2.45555
[truncated: 8,104 more rows]

## Sheet: Table S2. Fulvestrant
Table S2: Differential expression analysis of MCF7 cell lines following 48 hours treatment with Fulvestrant versus vehicle (0.01% DMSO).
ENTREZID	SYMBOL	MAP	logFC	AveExpr	t	P.Value	adj.P.Val	B
9687	GREB1	2p25.1	-5.88744	6.52957	-39.432	1.44591e-22	1.46066e-18	39.182
440	ASNS	7q21.3	-3.88049	6.02262	-31.3878	2.4605e-20	1.2428e-16	36.1019
10797	MTHFD2	2p13.1	-2.80845	7.64089	-29.8295	7.69534e-20	2.59128e-16	35.3924
8614	STC2	5q35.2	-3.29553	7.64537	-28.4692	2.1831e-19	5.51342e-16	34.1966
8140	SLC7A5	16q24.2	-3.45759	7.60851	-25.5145	2.49792e-18	5.0468e-15	32.0264
7031	TFF1	21q22.3	-4.25305	8.18795	-24.8411	4.51733e-18	6.554e-15	31.4221
26227	PHGDH	1p12	-2.79535	7.02817	-24.7699	4.8134e-18	6.554e-15	31.3989
79875	THSD4	15q23	-2.93496	6.52008	-24.6857	5.19026e-18	6.554e-15	31.1261
100506492	DSCAM-AS1	21q22.2	-3.20547	9.25339	-23.9549	1.00822e-17	1.13167e-14	30.688
55573	CDV3	3q22.1	-1.85498	8.9916	-23.8067	1.15626e-17	1.16805e-14	30.5572
5106	PCK2	14q11.2-q12	-2.74261	6.52918	-23.5817	1.42557e-17	1.3092e-14	30.2911
6301	SARS	1p13.3	-2.12555	8.62014	-22.8371	2.88944e-17	2.43242e-14	29.6476
23467	NPTXR	22q13.1	2.30771	8.1634	22.3902	4.46071e-17	3.46632e-14	29.2075
8565	YARS	1p35.1	-2.1015	7.4341	-22.2408	5.1668e-17	3.72822e-14	29.059
2617	GARS	7p14.3	-2.16207	7.74103	-22.1543	5.62847e-17	3.79059e-14	28.9804
3554	IL1R1	2q11.2-q12.1	3.15932	5.60909	21.7329	8.57374e-17	5.38601e-14	28.1283
26471	NUPR1	16p11.2	-3.71218	3.96479	-21.6778	9.06376e-17	5.38601e-14	27.719
3376	IARS	9q22.31	-1.9438	8.02212	-21.4958	1.09009e-16	6.11784e-14	28.3265
4602	MYB	6q23.3	-2.64515	6.04879	-21.0344	1.7515e-16	9.31246e-14	27.7324
12	SERPINA3	14q32.13	-3.80761	7.80877	-20.782	2.27942e-16	1.12955e-13	27.5561
16	AARS	16q22.1	-1.75152	9.29493	-20.7537	2.34811e-16	1.12955e-13	27.5555
6472	SHMT2	12q13.3	-2.00081	7.21237	-20.5096	3.03892e-16	1.39542e-13	27.3049
23657	SLC7A11	4q28.3	-5.95081	2.61555	-19.214	1.25278e-15	5.50244e-13	23.0216
2674	GFRA1	10q25.3	-2.18494	7.539	-19.0691	1.47569e-15	6.21143e-13	25.7337
6520	SLC3A2	11q12.3	-2.19104	7.90359	-18.8545	1.88422e-15	7.61377e-13	25.4807
152926	PPM1K	4q22.1	-3.14967	4.81068	-18.8026	1.99969e-15	7.76958e-13	25.1135
11260	XPOT	12q14.2	-1.71371	8.05405	-18.6628	2.34892e-15	8.78845e-13	25.258
445	ASS1	9q34.11	-1.98524	8.53358	-18.6088	2.50051e-15	9.0215e-13	25.1832
25987	TSKU	11q13.5	-2.39285	5.63891	-18.1778	4.14043e-15	1.4423e-12	24.6676
55771	PRR11	17q22	-2.78344	5.45503	-18.1242	4.41133e-15	1.48415e-12	24.6447
6790	AURKA	20q13.2	-2.19712	5.98996	-18.0973	4.55441e-15	1.48415e-12	24.613
2023	ENO1	1p36.23	1.58693	11.148	17.4526	9.90837e-15	3.12795e-12	23.7567
11065	UBE2C	20q13.12	-2.78391	4.7584	-17.3976	1.06009e-14	3.24517e-12	23.7717
4141	MARS	12q13.3	-1.94856	6.99255	-17.3036	1.19008e-14	3.53593e-12	23.6494
1826	DSCAM	21q22.2	-3.26445	4.58049	-16.8783	2.02289e-14	5.83865e-12	22.5928
23466	CBX6	22q13.1	1.49225	8.82512	16.5741	2.97733e-14	8.35472e-12	22.6892
6897	TARS	5p13.3	-1.43173	7.69772	-16.4843	3.34103e-14	9.12193e-12	22.5924
1054	CEBPG	19q13.11	-1.97467	5.48989	-16.4044	3.70337e-14	9.84512e-12	22.5258
1191	CLU	8p21.1	1.61654	9.15503	16.2891	4.30041e-14	1.11392e-11	22.3168
3015	H2AFZ	4q23	-1.68761	7.7332	-16.2679	4.42021e-14	1.11632e-11	22.3018
5104	SERPINA5	14q32.13	-3.10101	5.63271	-16.0434	5.93007e-14	1.46111e-11	21.9999
9055	PRC1	15q26.1	-2.16548	5.75141	-15.6389	1.01577e-13	2.44316e-11	21.5164
6541	SLC7A1	13q12.3	-1.98498	6.7765	-15.5863	1.09034e-13	2.56154e-11	21.4305
3148	HMGB2	4q34.1	-2.02053	6.73753	-15.4543	1.30362e-13	2.993e-11	21.2335
7164	TPD52L1	6q22.31	-1.74868	6.92599	-15.4302	1.34695e-13	3.02374e-11	21.2304
3897	L1CAM	Xq28	1.79365	6.70919	15.3946	1.4139e-13	3.06135e-11	21.1956
6782	HSPA13	21q11.2	-1.82947	5.84735	-15.3892	1.42431e-13	3.06135e-11	21.1931
7453	WARS	14q32.2	-1.57648	6.73017	-15.2294	1.77272e-13	3.73084e-11	20.9452
2058	EPRS	1q41	-1.41897	8.00523	-15.1914	1.86781e-13	3.85073e-11	20.8438
60481	ELOVL5	6p12.1	-1.41781	7.21815	-15.135	2.01898e-13	4.07914e-11	20.8071
22974	TPX2	20q11.21	-2.05837	6.02106	-14.9887	2.47353e-13	4.89952e-11	20.6129
1062	CENPE	4q24	-3.00055	3.79492	-14.7581	3.41728e-13	6.63873e-11	20.2609
5347	PLK1	16p12.2	-2.40402	4.40986	-14.6167	4.17532e-13	7.95832e-11	20.1268
10486	CAP2	6p22.3	-2.24091	5.03068	-14.5832	4.37909e-13	8.19215e-11	20.0433
7153	TOP2A	17q21.2	-2.97001	5.97633	-14.4758	5.10559e-13	9.37757e-11	19.869
578	BAK1	6p21.31	2.32394	6.58907	14.4423	5.35722e-13	9.46086e-11	19.8706
29127	RACGAP1	12q13.12	-2.31993	5.36997	-14.442	5.35906e-13	9.46086e-11	19.8698
23642	SNHG1	11q12.3	-1.48148	5.97093	-14.4326	5.43189e-13	9.46086e-11	19.8499
81611	ANP32E	1q21.2	-1.54398	5.975	-14.3185	6.40357e-13	1.08617e-10	19.6785
25902	MTHFD1L	6q25.1	-1.95526	5.15937	-14.3133	6.45123e-13	1.08617e-10	19.6958
8204	NRIP1	21q11.2-q21.1	-1.95086	6.35919	-14.2767	6.80221e-13	1.12649e-10	19.6274
29089	UBE2T	1q32.1	-2.23422	4.2502	-14.0899	8.93091e-13	1.45516e-10	19.3375
9361	LONP1	19p13.3	-1.48582	6.47042	-13.8984	1.18415e-12	1.89878e-10	19.034
3005	H1F0	22q13.1	-1.18216	8.48146	-13.8863	1.20555e-12	1.90289e-10	18.924
23641	LDOC1	Xq27.1	1.36924	8.02512	13.8303	1.31007e-12	2.03605e-10	18.8802
489	ATP2A3	17p13.2	1.32529	7.34342	13.7891	1.39294e-12	2.12617e-10	18.8562
51520	LARS	5q32	-1.26839	7.73446	-13.7808	1.41015e-12	2.12617e-10	18.8016
347902	AMIGO2	12q13.11	-2.03954	5.36952	-13.713	1.56049e-12	2.31764e-10	18.8147
84722	PSRC1	1p13.3	-1.81499	4.51627	-13.7034	1.58303e-12	2.31764e-10	18.8072
59345	GNB4	3q26.33	-1.84275	5.16832	-13.6038	1.8385e-12	2.65321e-10	18.659
54431	DNAJC10	2q32.1	-1.32564	6.98855	-13.5729	1.92624e-12	2.70807e-10	18.5279
753	LDLRAD4	18p11.21	2.10135	5.59467	13.5632	1.9546e-12	2.70807e-10	18.5965
4256	MGP	12p12.3	-2.84004	4.63545	-13.5624	1.95693e-12	2.70807e-10	18.4408
160428	ALDH1L2	12q23.3	-5.33917	1.90025	-13.538	2.03055e-12	2.77197e-10	16.4826
11004	KIF2C	1p34.1	-2.47173	3.92274	-13.4395	2.35757e-12	3.13876e-10	18.4111
6509	SLC1A4	2p14	-1.90429	4.28032	-13.4385	2.36137e-12	3.13876e-10	18.3915
2335	FN1	2q35	-1.42937	7.09289	-13.3743	2.60398e-12	3.41629e-10	18.2168
22843	PPM1E	17q22	-1.94471	4.80916	-13.3442	2.72649e-12	3.53115e-10	18.2695
10024	TROAP	12q13.12	-2.09737	3.28273	-13.3277	2.79647e-12	3.57594e-10	18.2421
9915	ARNT2	15q25.1	1.70569	7.63069	13.2996	2.91944e-12	3.64146e-10	18.098
7112	TMPO	12q23.1	-1.47796	7.17019	-13.2891	2.96676e-12	3.64146e-10	18.0646
23397	NCAPH	2q11.2	-2.52318	2.85372	-13.2843	2.9887e-12	3.64146e-10	18.1403
3838	KPNA2	17q24.2	-1.46413	7.7743	-13.2836	2.99189e-12	3.64146e-10	18.0238
23389	MED13L	12q24.21	-1.2955	7.78109	-13.2354	3.22212e-12	3.87498e-10	17.9659
5885	RAD21	8q24.11	-1.28035	8.48747	-13.2028	3.3878e-12	4.0263e-10	17.8769
1163	CKS1B	1q21.3	-2.5637	4.37578	-13.1905	3.45262e-12	4.05563e-10	18.0294
4751	NEK2	1q32.3	-2.53767	2.43233	-13.12	3.85054e-12	4.42824e-10	17.7623
771	CA12	15q22.2	-1.34877	7.49692	-13.1188	3.85751e-12	4.42824e-10	17.8214
6241	RRM2	2p25.1	-2.14974	5.58272	-13.105	3.94131e-12	4.4736e-10	17.8261
54828	BCAS3	17q23.2	1.06181	9.75899	13.0802	4.09557e-12	4.59705e-10	17.659
3161	HMMR	5q34	-2.732	2.52554	-13.0322	4.41349e-12	4.89946e-10	17.6995
10606	PAICS	4q12	-1.09027	8.06148	-12.9746	4.8282e-12	5.30157e-10	17.5401
55143	CDCA8	1p34.3	-2.3891	3.65651	-12.9053	5.38171e-12	5.84581e-10	17.5961
4904	YBX1	1p34.2	-1.0466	8.43347	-12.8927	5.48904e-12	5.89897e-10	17.3905
891	CCNB1	5q13.2	-2.00243	5.49723	-12.8639	5.74335e-12	6.10403e-10	17.4679
222	ALDH3B2	11q13.2	-1.62123	6.61996	-12.8576	5.8007e-12	6.10403e-10	17.4309
29956	CERS2	1q21.3	1.08079	9.95244	12.841	5.95419e-12	6.20095e-10	17.2686
6536	SLC6A9	1p34.1	-2.23101	3.89633	-12.8284	6.0743e-12	6.26148e-10	17.4272
29028	ATAD2	8q24.13	-1.90434	6.17866	-12.7748	6.6103e-12	6.74518e-10	17.3013
7764	ZNF217	20q13.2	1.23246	10.0407	12.7079	7.35038e-12	7.42535e-10	17.0516
9764	KIAA0513	16q24.1	1.61358	6.2386	12.6886	7.57898e-12	7.58048e-10	17.2404
1509	CTSD	11p15.5	-1.36593	10.383	-12.6359	8.24253e-12	8.16334e-10	16.9215
81620	CDT1	16q24.3	-1.96222	4.05198	-12.5769	9.0579e-12	8.88378e-10	17.0821
10079	ATP9A	20q13.2	0.972469	9.17005	12.5707	9.14814e-12	8.88601e-10	16.8549
84706	GPT2	16q11.2	-1.67831	5.96269	-12.5312	9.74516e-12	9.37577e-10	16.9443
27338	UBE2S	19q13.42	-1.78102	5.07759	-12.4965	1.03038e-11	9.81971e-10	16.9343
54676	GTPBP2	6p21.1	-1.50719	6.18776	-12.483	1.05308e-11	9.94222e-10	16.8425
10112	KIF20A	5q31.2	-2.08775	4.00229	-12.277	1.47034e-11	1.37419e-09	16.5785
10615	SPAG5	17q11.2	-2.10949	4.27681	-12.2718	1.48274e-11	1.37419e-09	16.5882
2203	FBP1	9q22.32	1.02864	7.80084	12.1802	1.72228e-11	1.58168e-09	16.2605
2914	GRM4	6p21.31	2.14739	4.48718	12.0844	2.01623e-11	1.83495e-09	16.2612
25932	CLIC4	1p36.11	-1.21609	7.73782	-11.9201	2.64765e-11	2.36249e-09	15.8089
9918	NCAPD2	12p13.31	-1.22158	6.41002	-11.9153	2.66871e-11	2.36249e-09	15.8662
2947	GSTM3	1p13.3	1.14897	9.08647	11.9151	2.66981e-11	2.36249e-09	15.7732
3925	STMN1	1p36.11	-1.66691	6.41217	-11.9107	2.68944e-11	2.36249e-09	15.8569
100133941	CD24	6q21	1.16651	10.8488	11.85	2.97621e-11	2.59187e-09	15.5959
444	ASPH	8q12.3	-1.46525	5.12179	-11.8327	3.06382e-11	2.64536e-09	15.8637
6867	TACC1	8p11.22	1.27287	6.54278	11.7868	3.30915e-11	2.82972e-09	15.6929
5831	PYCR1	17q25.3	-1.24705	6.82616	-11.7824	3.33336e-11	2.82972e-09	15.6401
5723	PSPH	7p11.2	-1.74315	4.39372	-11.7743	3.37898e-11	2.84454e-09	15.7818
284611	FAM102B	1p13.3	-1.19802	8.48595	-11.7661	3.4262e-11	2.86045e-09	15.5301
128239	IQGAP3	1q22	-2.39611	3.47401	-11.7562	3.48383e-11	2.86868e-09	15.7451
3399	ID3	1p36.12	1.62616	6.24116	11.7546	3.49285e-11	2.86868e-09	15.6996
1051	CEBPB	20q13.13	-1.74069	4.70529	-11.7429	3.56286e-11	2.90258e-09	15.729
8458	TTF2	1p13.1	-1.37729	6.06714	-11.734	3.61612e-11	2.9224e-09	15.6183
57658	CALCOCO1	12q13.13	1.30859	6.42267	11.7195	3.70606e-11	2.97132e-09	15.6038
4677	NARS	18q21.31	-0.961541	7.73083	-11.7046	3.80011e-11	3.02273e-09	15.4515
994	CDC25B	20p13	-1.18666	6.81518	-11.6776	3.97779e-11	3.13934e-09	15.4352
29899	GPSM2	1p13.3	-1.49363	5.23651	-11.6562	4.12476e-11	3.18432e-09	15.5251
169200	TMEM64	8q21.3	-1.30874	8.74729	-11.6525	4.1507e-11	3.18432e-09	15.3485
10403	NDC80	18p11.32	-2.60525	3.47511	-11.6455	4.20017e-11	3.18432e-09	15.5601
4430	MYO1B	2q32.3	1.5166	8.27928	11.6445	4.20723e-11	3.18432e-09	15.3483
56937	PMEPA1	20q13.31	1.0319	8.59332	11.6427	4.21964e-11	3.18432e-09	15.3282
145483	FAM161B	14q24.3	1.9327	4.90181	11.6421	4.2239e-11	3.18432e-09	15.5625
9088	PKMYT1	16p13.3	-2.18062	3.52716	-11.6272	4.33207e-11	3.24167e-09	15.5372
5983	RFC3	13q13.2	-2.05274	4.45148	-11.5995	4.54113e-11	3.37313e-09	15.4911
1718	DHCR24	1p32.3	0.898773	9.25772	11.5739	4.74324e-11	3.49753e-09	15.1715
4085	MAD2L1	4q27	-2.43147	3.59342	-11.569	4.78248e-11	3.50091e-09	15.4157
1317	SLC31A1	9q32	-1.38943	6.16224	-11.5611	4.84782e-11	3.52321e-09	15.32
24137	KIF4A	Xq13.1	-2.32707	4.16241	-11.5376	5.0453e-11	3.64055e-09	15.3517
890	CCNA2	4q27	-2.36485	3.59897	-11.5102	5.28736e-11	3.78048e-09	15.338
11113	CIT	12q24.23	-2.41597	2.88944	-11.5058	5.32735e-11	3.78048e-09	15.3326
55635	DEPDC1	1p31.3	-2.70871	2.34931	-11.5031	5.3515e-11	3.78048e-09	15.2786
135398	C6orf141	6p12.3	-1.94197	4.91597	-11.4932	5.44312e-11	3.8185e-09	15.311
10460	TACC3	4p16.3	-1.93207	4.29849	-11.4752	5.61338e-11	3.91078e-09	15.2484
51187	RSL24D1	15q21.3	-1.13671	7.27795	-11.4641	5.72146e-11	3.95878e-09	15.0568
26509	MYOF	10q23.33	-1.03883	8.38765	-11.4529	5.83224e-11	4.00798e-09	14.9951
6510	SLC1A5	19q13.32	-0.955384	9.50349	-11.4132	6.24344e-11	4.26157e-09	14.8642
116461	TSEN15	1q25.3	-1.81207	4.92638	-11.4072	6.3087e-11	4.27721e-09	15.15
3313	HSPA9	5q31.2	-0.973739	8.92809	-11.3492	6.97231e-11	4.69562e-09	14.7825
6059	ABCE1	4q31.21	-1.17297	6.08844	-11.3235	7.28884e-11	4.87628e-09	14.9219
94122	SYTL5	Xp11.4	-2.74487	4.1598	-11.2413	8.40533e-11	5.5718e-09	14.735
332	BIRC5	17q25.3	-2.08335	3.56899	-11.239	8.43878e-11	5.5718e-09	14.8499
57007	ACKR3	2q37.3	1.36587	7.12185	11.2222	8.689e-11	5.69976e-09	14.6953
2057	EPOR	19p13.2	1.80534	4.45538	11.1994	9.04024e-11	5.8919e-09	14.8102
5046	PCSK6	15q26.3	0.956101	7.014	11.1884	9.21555e-11	5.96766e-09	14.6043
10926	DBF4	7q21.12	-1.90026	4.13096	-11.1753	9.42797e-11	6.06633e-09	14.7715
79752	ZFAND1	8q21.13	-1.43349	5.55362	-11.1672	9.56298e-11	6.11425e-09	14.674
83543	AIF1L	9q34.12-q34.13	0.998091	7.55556	11.1484	9.88211e-11	6.27856e-09	14.4941
8537	BCAS1	20q13.2	1.88532	6.82966	11.1154	1.04696e-10	6.61025e-09	14.5671
6747	SSR3	3q25.31	-1.01512	7.55205	-11.075	1.12385e-10	7.05161e-09	14.3616
255743	NPNT	4q24	1.34799	8.35936	10.9893	1.30696e-10	8.14993e-09	14.1775
9928	KIF14	1q32.1	-2.29335	2.94892	-10.9708	1.3504e-10	8.36919e-09	14.4174
6548	SLC9A1	1p36.11	1.21904	7.87767	10.9433	1.41766e-10	8.73241e-09	14.1137
9188	DDX21	10q22.1	-1.05322	7.10191	-10.9163	1.48732e-10	9.106e-09	14.1091
79017	GGCT	7p14.3	-1.10267	7.01381	-10.9001	1.53061e-10	9.31459e-09	14.0758
4001	LMNB1	5q23.2	-1.39592	6.28373	-10.8808	1.58401e-10	9.57954e-09	14.0557
9824	ARHGAP11A	15q13.3	-1.97269	4.16318	-10.8776	1.59311e-10	9.57954e-09	14.2164
6917	TCEA1	8q11.23	-1.22742	6.8602	-10.8703	1.61378e-10	9.64637e-09	14.0231
1063	CENPF	1q41	-1.98195	4.80652	-10.856	1.65555e-10	9.83786e-09	14.1116
983	CDK1	10q21.2	-2.11483	4.2534	-10.846	1.68528e-10	9.95595e-09	14.1488
991	CDC20	1p34.2	-1.84685	4.33721	-10.8415	1.69893e-10	9.97827e-09	14.1124
10209	EIF1	17q21.2	-0.946244	8.82164	-10.7857	1.87697e-10	1.09602e-08	13.7677
960	CD44	11p13	-2.47702	4.33936	-10.7824	1.88799e-10	1.09612e-08	14.0511
6478	SIAH2	3q25.1	-1.18489	6.4914	-10.7773	1.90531e-10	1.09985e-08	13.9118
55157	DARS2	1q25.1	-1.12915	6.83077	-10.7565	1.97768e-10	1.12974e-08	13.8249
729375	FAM86HP	3q22.1	2.39647	4.70803	10.756	1.97946e-10	1.12974e-08	14.0123
57648	KIAA1522	1p35.1	0.876232	8.76909	10.7386	2.04192e-10	1.15885e-08	13.6947
5174	PDZK1	1q21.1	-4.84768	2.77922	-10.7252	2.09183e-10	1.18054e-08	12.9304
83719	YPEL3	16p11.2	1.381	6.61242	10.7171	2.12255e-10	1.19122e-08	13.8195
11031	RAB31	18p11.22	-1.44457	7.05601	-10.7137	2.13556e-10	1.1919e-08	13.7913
4059	BCAM	19q13.32	1.07487	9.05072	10.6978	2.19726e-10	1.2196e-08	13.6116
9493	KIF23	15q23	-1.70014	4.89957	-10.6783	2.27574e-10	1.25626e-08	13.8075
8971	H1FX	3q21.3	-0.964398	7.46704	-10.6382	2.44662e-10	1.34325e-08	13.5504
7422	VEGFA	6p21.1	-1.37944	6.47124	-10.6344	2.46338e-10	1.34514e-08	13.6471
221662	RBM24	6p22.3	-3.39634	2.61462	-10.6062	2.59217e-10	1.40307e-08	13.0212
22948	CCT5	5p15.2	-0.881339	8.61997	-10.6051	2.59725e-10	1.40307e-08	13.4498
10051	SMC4	3q25.33	-1.44256	6.91191	-10.5989	2.62669e-10	1.41143e-08	13.5145
1894	ECT2	3q26.31	-1.47803	6.57236	-10.5179	3.04292e-10	1.62337e-08	13.3856
23306	NEMP1	12q13.3	-1.78951	4.37278	-10.516	3.05325e-10	1.62337e-08	13.6075
57761	TRIB3	20p13	-1.14784	6.67015	-10.5097	3.08877e-10	1.63365e-08	13.3673
51203	NUSAP1	15q15.1	-2.1177	4.19459	-10.5025	3.12958e-10	1.64662e-08	13.5205
9674	KIAA0040	1q25.1	-1.23645	5.46949	-10.4928	3.1854e-10	1.6673e-08	13.4867
4609	MYC	8q24.21	-1.17668	6.61022	-10.4885	3.2103e-10	1.67167e-08	13.3631
55872	PBK	8p21.1	-2.27847	2.63497	-10.4837	3.23845e-10	1.67768e-08	13.5321
833	CARS	11p15.4	-1.19631	6.16063	-10.446	3.46919e-10	1.78805e-08	13.3008
1978	EIF4EBP1	8p11.23	-1.62706	5.46932	-10.4394	3.51109e-10	1.80046e-08	13.3693
1942	EFNA1	1q22	1.00745	6.60395	10.4306	3.56815e-10	1.82048e-08	13.2704
55920	RCC2	1p36.13	-0.841349	8.68806	-10.4267	3.59418e-10	1.82454e-08	13.1115
4627	MYH9	22q12.3	0.937518	8.90957	10.4188	3.64626e-10	1.83281e-08	13.0994
5570	PKIB	6q22.31	-2.23054	5.02151	-10.4187	3.64675e-10	1.83281e-08	13.4169
23213	SULF1	8q13.2-q13.3	-3.80764	2.07504	-10.3585	4.07272e-10	2.03676e-08	12.5435
9232	PTTG1	5q33.3	-1.75027	3.20149	-10.3457	4.16992e-10	2.06682e-08	13.2941
6491	STIL	1p33	-2.16615	3.70725	-10.3452	4.17375e-10	2.06682e-08	13.3049
3014	H2AFX	11q23.3	-1.39126	6.2368	-10.3294	4.29697e-10	2.11746e-08	13.0661
80139	ZNF703	8p11.23	-1.38338	6.50299	-10.3074	4.47471e-10	2.19434e-08	13.0329
26154	ABCA12	2q35	-2.16039	7.39513	-10.2979	4.55379e-10	2.22234e-08	12.9684
57822	GRHL3	1p36.11	2.52401	4.37202	10.2904	4.61754e-10	2.24261e-08	13.1433
7033	TFF3	21q22.3	-1.90605	4.84268	-10.2736	4.76309e-10	2.30224e-08	13.1608
27092	CACNG4	17q24.2	0.949109	8.57014	10.2702	4.79265e-10	2.30549e-08	12.8491
144501	KRT80	12q13.13	0.892897	8.10296	10.2573	4.90852e-10	2.35004e-08	12.8465
10057	ABCC5	3q27.1	1.03286	8.29473	10.2435	5.03574e-10	2.39958e-08	12.7928
7468	NSD2	4p16.3	-1.03246	7.24609	-10.2393	5.07501e-10	2.40694e-08	12.8217
55215	FANCI	15q26.1	-1.66923	5.24325	-10.2283	5.1792e-10	2.44487e-08	12.9652
54898	ELOVL2	6p24.2	-3.19597	5.25968	-10.2227	5.23313e-10	2.45884e-08	13.0783
171546	SPTSSA	14q13.1	-1.1837	6.4859	-10.1803	5.66194e-10	2.64801e-08	12.7976
51706	CYB5R1	1q32.1	1.28687	7.01836	10.1774	5.69328e-10	2.65039e-08	12.7746
11200	CHEK2	22q12.1	-1.66582	4.96104	-10.161	5.86989e-10	2.71716e-08	12.9345
1854	DUT	15q21.1	-1.38272	5.29023	-10.1591	5.8905e-10	2.71716e-08	12.8465
80346	REEP4	8p21.3	-1.41638	4.80727	-10.1155	6.3887e-10	2.93358e-08	12.8338
5241	PGR	11q22.1	-3.08461	5.02148	-10.1081	6.47798e-10	2.96111e-08	12.8743
83540	NUF2	1q23.3	-3.1703	2.01258	-10.104	6.52778e-10	2.97043e-08	12.8416
7162	TPBG	6q14.1	-1.16479	6.66698	-10.0985	6.59578e-10	2.98033e-08	12.6315
79801	SHCBP1	16q11.2	-2.10696	2.31201	-10.0974	6.60854e-10	2.98033e-08	12.8569
2618	GART	21q22.11	-1.01415	6.43179	-10.0615	7.06759e-10	3.17319e-08	12.5702
150468	CKAP2L	2q14.1	-2.62744	1.51956	-10.0454	7.28464e-10	3.25421e-08	12.585
80329	ULBP1	6q25.1	-2.76953	2.61375	-10.0434	7.31248e-10	3.25421e-08	12.5367
10451	VAV3	1p13.3	-1.08096	7.10405	-10.0098	7.78898e-10	3.45106e-08	12.4136
54058	C21orf58	21q22.3	-1.72262	4.31464	-10.0005	7.92609e-10	3.49648e-08	12.6512
7108	TM7SF2	11q13.1	1.20331	6.77549	9.98736	8.12438e-10	3.55897e-08	12.4284
64151	NCAPG	4p15.31	-3.00595	2.11644	-9.98646	8.1382e-10	3.55897e-08	12.6009
57835	SLC4A5	2p13.1	-1.86344	3.45604	-9.98382	8.17867e-10	3.56125e-08	12.6363
3619	INCENP	11q12.3	-1.63583	4.66878	-9.97851	8.26098e-10	3.58165e-08	12.5486
3664	IRF6	1q32.2	1.82818	6.24849	9.96981	8.3974e-10	3.61627e-08	12.4688
10525	HYOU1	11q23.3	-0.95142	8.75905	-9.96887	8.41242e-10	3.61627e-08	12.2378
157313	CDCA2	8p21.2	-2.12507	2.74397	-9.96555	8.46519e-10	3.62353e-08	12.5878
113130	CDCA5	11q13.1	-1.80742	4.13594	-9.86945	1.01525e-09	4.32745e-08	12.3824
7272	TTK	6q14.1	-2.67115	2.74527	-9.86284	1.02807e-09	4.36368e-08	12.4152
8148	TAF15	17q12	-0.963678	6.98008	-9.85921	1.03518e-09	4.37547e-08	12.1273
2896	GRN	17q21.31	1.00371	9.23715	9.856	1.0415e-09	4.38385e-08	12.0179
7113	TMPRSS2	21q22.3	1.2022	5.93931	9.84344	1.06665e-09	4.4463e-08	12.2392
3694	ITGB6	2q24.2	1.93548	6.79833	9.84253	1.06851e-09	4.4463e-08	12.2283
9787	DLGAP5	14q22.3	-2.15448	2.93322	-9.84202	1.06954e-09	4.4463e-08	12.3495
342184	FMN1	15q13.3	-2.3942	3.48995	-9.8328	1.08845e-09	4.49996e-08	12.29
54908	SPDL1	5q35.1	-2.01322	3.62311	-9.8314	1.09136e-09	4.49996e-08	12.3642
124540	MSI2	17q22	-0.856023	8.69072	-9.82657	1.10142e-09	4.523e-08	11.9779
5932	RBBP8	18q11.2	-1.59161	5.40228	-9.81821	1.1191e-09	4.57699e-08	12.2507
81930	KIF18A	11p14.1	-2.40094	2.58636	-9.80966	1.13745e-09	4.63327e-08	12.2721
824	CAPN2	1q41	-1.19292	6.57949	-9.80388	1.15005e-09	4.6658e-08	12.0932
3480	IGF1R	15q26.3	-0.911151	7.61634	-9.78387	1.19478e-09	4.82786e-08	11.9423
1999	ELF3	1q32.1	1.04963	6.56123	9.7802	1.20317e-09	4.84242e-08	12.0666
701	BUB1B	15q15.1	-2.13914	2.94923	-9.74827	1.27883e-09	5.12648e-08	12.2094
5909	RAP1GAP	1p36.12	0.899272	6.57214	9.73903	1.30163e-09	5.19727e-08	11.9401
28966	SNX24	5q23.2	-1.40347	4.82653	-9.72657	1.33305e-09	5.30175e-08	12.1217
6566	SLC16A1	1p13.2	-1.83188	3.8727	-9.71514	1.36257e-09	5.3979e-08	12.1452
1164	CKS2	9q22.2	-1.5972	4.94272	-9.71289	1.36845e-09	5.40002e-08	12.0494
9768	PCLAF	15q22.31	-1.63775	4.12994	-9.70961	1.37708e-09	5.41294e-08	12.0583
5305	PIP4K2A	10p12.2	-1.08994	5.91304	-9.70383	1.39243e-09	5.45207e-08	11.9383
4325	MMP16	8q21.3	1.26713	5.75102	9.68273	1.44997e-09	5.65546e-08	11.9649
2899	GRIK3	1p34.3	-2.28594	3.33776	-9.6716	1.4813e-09	5.75543e-08	12.0456
58477	SRPRB	3q22.1	-0.995196	6.08617	-9.64994	1.54429e-09	5.97717e-08	11.8285
1736	DKC1	Xq28	-1.02412	7.13142	-9.64482	1.55961e-09	6.01341e-08	11.7059
55008	HERC6	4q22.1	-2.43518	3.30341	-9.63972	1.57497e-09	6.04064e-08	11.9316
7184	HSP90B1	12q23.3	-0.712915	11.0949	-9.63852	1.57863e-09	6.04064e-08	11.5079
5901	RAN	12q24.33	-0.809137	8.67064	-9.61648	1.64712e-09	6.27893e-08	11.5582
3329	HSPD1	2q33.1	-0.726695	9.15788	-9.60488	1.6844e-09	6.39691e-08	11.5167
22979	EFR3B	2p23.3	1.20638	6.31284	9.59989	1.7007e-09	6.43464e-08	11.746
4071	TM4SF1	3q25.1	1.10507	6.7366	9.59125	1.72934e-09	6.51857e-08	11.6653
2177	FANCD2	3p25.3	-1.65244	4.72328	-9.57938	1.76944e-09	6.64495e-08	11.7832
1876	E2F6	2p25.1	-1.16518	5.80649	-9.57115	1.79783e-09	6.72654e-08	11.7164
5954	RCN1	11p13	-1.22276	5.4421	-9.56144	1.83192e-09	6.82879e-08	11.7039
596	BCL2	18q21.33	-1.19586	5.80499	-9.55039	1.87154e-09	6.95086e-08	11.6579
2305	FOXM1	12p13.33	-1.71766	4.3864	-9.54147	1.90416e-09	7.04609e-08	11.6916
4147	MATN2	8q22.1-q22.2	1.87364	5.98128	9.49484	2.08454e-09	7.68542e-08	11.6077
8648	NCOA1	2p23.3	1.00708	6.84838	9.48928	2.1072e-09	7.74071e-08	11.4399
147841	SPC24	19p13.2	-2.39912	2.39888	-9.47699	2.15816e-09	7.89917e-08	11.6539
55890	GPRC5C	17q25.1	1.07408	5.70072	9.46128	2.22518e-09	8.1151e-08	11.519
1960	EGR3	8p21.3	-3.71886	3.07691	-9.45329	2.2601e-09	8.21277e-08	11.2555
54855	FAM46C	1p12	-1.12564	5.88774	-9.42128	2.40575e-09	8.7107e-08	11.3931
9543	IGDCC3	15q22.31	1.56509	4.65691	9.41441	2.43824e-09	8.79683e-08	11.5627
9601	PDIA4	7q36.1	-0.76044	9.00788	-9.41031	2.45788e-09	8.83613e-08	11.1333
53947	A4GALT	22q13.2	-1.53299	5.1997	-9.39974	2.50918e-09	8.98855e-08	11.4687
8894	EIF2S2	20q11.22	-0.938993	7.57157	-9.38763	2.56937e-09	9.17166e-08	11.1582
1047	CLGN	4q31.1	-4.60924	1.07744	-9.36916	2.66402e-09	9.47604e-08	10.4773
9697	TRAM2	6p12.2	0.914845	6.55597	9.36535	2.68396e-09	9.51348e-08	11.2305
9833	MELK	9p13.2	-1.65849	3.12186	-9.35475	2.74033e-09	9.64992e-08	11.458
2805	GOT1	10q24.2	-1.05254	5.78353	-9.35452	2.74156e-09	9.64992e-08	11.2674
541471	MIR4435-2HG	2q13	1.50616	5.22506	9.32609	2.89895e-09	1.01685e-07	11.3312
91433	RCCD1	15q26.1	-1.51182	4.12697	-9.31847	2.94271e-09	1.02863e-07	11.3648
83461	CDCA3	12p13.31	-1.87703	2.83774	-9.28808	3.12407e-09	1.0876e-07	11.324
23327	NEDD4L	18q21.31	1.17831	6.59291	9.28664	3.13296e-09	1.0876e-07	11.0786
9793	CKAP5	11p11.2	-0.840783	7.79753	-9.28472	3.14482e-09	1.08798e-07	10.9333
655	BMP7	20q13.31	0.898343	9.21383	9.25999	3.302e-09	1.13846e-07	10.8249
7443	VRK1	14q32.2	-1.5156	4.29642	-9.25744	3.31864e-09	1.1403e-07	11.2444
832	CAPZB	1p36.13	0.777162	8.18748	9.23399	3.476e-09	1.19032e-07	10.8372
9700	ESPL1	12q13.13	-2.31934	2.65806	-9.22813	3.51651e-09	1.20013e-07	11.2004
81691	REXO5	16p12.3	-2.34886	2.62481	-9.22215	3.55829e-09	1.2103e-07	11.161
3487	IGFBP4	17q21.2	-0.949735	8.49601	-9.214	3.61616e-09	1.22585e-07	10.7746
5366	PMAIP1	18q21.32	-4.70372	1.59901	-9.20958	3.64797e-09	1.2325e-07	9.38335
4288	MKI67	10q26.2	-2.083	5.51062	-9.20555	3.67722e-09	1.23824e-07	10.866
51377	UCHL5	1q31.2	-1.07162	5.64371	-9.20315	3.69467e-09	1.23999e-07	10.987
1001	CDH3	16q22.1	0.793263	8.16937	9.19811	3.7318e-09	1.24742e-07	10.7602
22926	ATF6	1q23.3	-0.912067	6.44213	-9.19679	3.74153e-09	1.24742e-07	10.8751
54892	NCAPG2	7q36.3	-1.47041	5.06749	-9.19004	3.79193e-09	1.26007e-07	10.9754
1111	CHEK1	11q24.2	-1.75832	3.85092	-9.18465	3.83268e-09	1.26944e-07	11.1116
1952	CELSR2	1p13.3	-1.06106	8.24445	-9.17907	3.87537e-09	1.27899e-07	10.713
25800	SLC39A6	18q12.2	-1.6342	9.67771	-9.17757	3.88687e-09	1.27899e-07	10.6501
699	BUB1	2q13	-2.03137	3.44599	-9.17489	3.90764e-09	1.28165e-07	11.05
374	AREG	4q13.3	-7.69784	2.99477	-9.12342	4.32859e-09	1.41182e-07	9.38658
23234	DNAJC9	10q22.2	-1.0885	5.41172	-9.12297	4.33244e-09	1.41182e-07	10.8307
10376	TUBA1B	12q13.12	-1.3153	8.46211	-9.1168	4.38601e-09	1.42468e-07	10.5467
55839	CENPN	16q23.2	-1.45772	5.12048	-9.11337	4.41604e-09	1.42983e-07	10.8146
5863	RGL2	6p21.32	0.850423	8.12355	9.10432	4.49643e-09	1.45121e-07	10.5698
8607	RUVBL1	3q21.3	-1.09947	6.04074	-9.09659	4.56632e-09	1.46908e-07	10.723
580	BARD1	2q35	-1.75684	3.61691	-9.08994	4.62729e-09	1.48396e-07	10.9472
84319	CMSS1	3q12.1	-1.96747	3.96327	-9.0783	4.73602e-09	1.51403e-07	10.918
1643	DDB2	11p11.2	-1.3264	6.20126	-9.05731	4.93887e-09	1.57389e-07	10.7253
9528	TMEM59	1p32.3	0.814905	7.59752	9.0534	4.97761e-09	1.58123e-07	10.5066
4070	TACSTD2	1p32.1	0.913094	8.78691	9.04998	5.01179e-09	1.58123e-07	10.4324
55759	WDR12	2q33.2	-1.30309	4.84916	-9.04904	5.02123e-09	1.58123e-07	10.7842
114880	OSBPL6	2q31.2	-1.6566	4.07981	-9.04872	5.02449e-09	1.58123e-07	10.8311
83990	BRIP1	17q23.2	-1.41774	6.77752	-9.03784	5.13509e-09	1.61101e-07	10.4984
56992	KIF15	3p21.31	-2.76094	2.34572	-9.01715	5.35236e-09	1.67398e-07	10.8044
5493	PPL	16p13.3	0.844472	7.5774	9.01418	5.38438e-09	1.6788e-07	10.4345
10733	PLK4	4q28.1	-2.07939	2.8825	-8.99587	5.58583e-09	1.73625e-07	10.766
10056	FARSB	2q36.1	-1.23117	5.34702	-8.98195	5.74423e-09	1.78001e-07	10.5996
8836	GGH	8q12.3	-2.30841	3.58775	-8.96958	5.88881e-09	1.81923e-07	10.6993
10608	MXD4	4p16.3	1.07697	6.65735	8.96321	5.96473e-09	1.83706e-07	10.4091
4886	NPY1R	4q32.2	-2.91816	3.89224	-8.95467	6.06809e-09	1.86322e-07	10.6091
387680	WASHC2A	10q11.23	1.07782	6.34265	8.94172	6.22847e-09	1.90667e-07	10.4043
1903	S1PR3	9q22.1	1.11284	6.40906	8.9363	6.2969e-09	1.92179e-07	10.3954
440145	MZT1	13q21.33	-1.47951	4.28791	-8.93281	6.34134e-09	1.92834e-07	10.5941
388403	YPEL2	17q22	1.33869	5.9831	8.93162	6.35654e-09	1.92834e-07	10.4433
10541	ANP32B	9q22.33	-0.905118	8.16969	-8.88913	6.92579e-09	2.09474e-07	10.1065
3832	KIF11	10q23.33	-1.75152	4.66606	-8.88409	6.99668e-09	2.10986e-07	10.3606
29923	HILPDA	7q32.1	1.32166	5.9674	8.86459	7.27824e-09	2.18824e-07	10.2931
5982	RFC2	7q11.23	-1.33573	4.67557	-8.86284	7.30407e-09	2.18949e-07	10.3777
4171	MCM2	3q21.3	-1.50681	5.72756	-8.85592	7.40711e-09	2.21381e-07	10.2074
5889	RAD51C	17q22	-0.931961	7.30322	-8.84799	7.52712e-09	2.24304e-07	10.0813
80216	ALPK1	4q25	-1.63474	3.91315	-8.8462	7.55446e-09	2.24456e-07	10.4525
203068	TUBB	6p21.33	-0.847025	8.63233	-8.8369	7.69833e-09	2.2789e-07	9.98058
10236	HNRNPR	1p36.12	-0.892728	7.94488	-8.83582	7.71514e-09	2.2789e-07	10.0088
3835	KIF22	16p11.2	-1.1906	6.2327	-8.82912	7.82072e-09	2.30046e-07	10.1159
111	ADCY5	3q21.1	1.6873	5.34174	8.82831	7.83368e-09	2.30046e-07	10.3363
9212	AURKB	17p13.1	-2.94532	2.02121	-8.79898	8.31457e-09	2.4346e-07	10.3664
3608	ILF2	1q21.3	-0.767101	8.093	-8.79409	8.39757e-09	2.4518e-07	9.91987
6585	SLIT1	10q24.1	3.47544	2.32117	8.79068	8.45597e-09	2.46174e-07	9.69228
9319	TRIP13	5p15.33	-1.61409	4.04144	-8.78613	8.53475e-09	2.47239e-07	10.2989
348235	SKA2	17q22	-0.909209	6.97809	-8.78574	8.54153e-09	2.47239e-07	9.95745
642515	PRRT1B	9q34.13	1.46885	4.81215	8.78223	8.60276e-09	2.483e-07	10.2699
23052	ENDOD1	11q21	-1.16654	5.75621	-8.7773	8.68943e-09	2.50087e-07	10.1378
163	AP2B1	17q12	-0.681009	8.35179	-8.74493	9.28203e-09	2.66384e-07	9.80613
171024	SYNPO2	4q26	-1.26604	6.71968	-8.7362	9.44879e-09	2.70401e-07	9.94574
1983	EIF5	14q32.32	0.891794	7.74959	8.73091	9.55144e-09	2.72218e-07	9.84205
55789	DEPDC1B	5q12.1	-1.84982	3.07945	-8.73016	9.56615e-09	2.72218e-07	10.2238
84612	PARD6B	20q13.13	-1.01172	7.73207	-8.72438	9.67967e-09	2.74674e-07	9.82141
57486	NLN	5q12.3	-1.05881	5.82	-8.7198	9.7708e-09	2.76483e-07	9.99714
652	BMP4	14q22.2	1.59605	4.53411	8.71841	9.7986e-09	2.76496e-07	10.185
92291	CAPN13	2p23.1	1.55152	5.4688	8.71644	9.83799e-09	2.76834e-07	10.0747
90417	KNSTRN	15q15.1	-1.98803	3.71146	-8.71086	9.95084e-09	2.79232e-07	10.1746
6506	SLC1A2	11p13	-1.62466	4.11977	-8.70796	1.00101e-08	2.80118e-07	10.182
768211	RELL1	4p14	1.53589	4.33722	8.69731	1.02306e-08	2.85495e-07	10.1554
55654	TMEM127	2q11.2	0.785919	6.84779	8.67935	1.06138e-08	2.95373e-07	9.81017
1303	COL12A1	6q13-q14.1	-1.58364	8.81745	-8.66924	1.0836e-08	3.00729e-07	9.64356
84057	MND1	4q31.3	-3.2076	1.22649	-8.64882	1.12997e-08	3.12738e-07	9.77423
26353	HSPB8	12q24.23	-1.15164	5.98288	-8.62894	1.17706e-08	3.24882e-07	9.83065
100093631	GTF2IP4	7q11.23	0.980149	6.42568	8.62616	1.1838e-08	3.25168e-07	9.75243
4176	MCM7	7q22.1	-1.1839	6.55587	-8.62586	1.18453e-08	3.25168e-07	9.66601
80028	FBXL18	7p22.1	1.11523	5.80216	8.6127	1.21704e-08	3.32881e-07	9.80423
3309	HSPA5	9q33.3	-0.614329	10.6206	-8.61182	1.21922e-08	3.32881e-07	9.43242
2948	GSTM4	1p13.3	0.881154	6.41707	8.59304	1.26731e-08	3.45077e-07	9.6858
2064	ERBB2	17q12	0.688488	8.34697	8.58945	1.27672e-08	3.45629e-07	9.48641
387882	C12orf75	12q23.3	-1.13599	5.23254	-8.58932	1.27706e-08	3.45629e-07	9.81832
51564	HDAC7	12q13.11	0.844422	6.176	8.58702	1.28313e-08	3.45629e-07	9.67156
84154	RPF2	6q21	-1.18765	4.83151	-8.58701	1.28314e-08	3.45629e-07	9.83754
2202	EFEMP1	2p16.1	1.27905	6.82365	8.58485	1.28887e-08	3.45629e-07	9.60686
54843	SYTL2	11q14.1	0.762021	9.47543	8.58448	1.28987e-08	3.45629e-07	9.43315
64946	CENPH	5q13.2	-2.02584	2.96426	-8.58098	1.29919e-08	3.47207e-07	9.94312
93594	TBC1D31	8q24.13	-1.78019	3.33119	-8.57372	1.31879e-08	3.51516e-07	9.92669
25837	RAB26	16p13.3	1.53829	6.04131	8.57079	1.32678e-08	3.52715e-07	9.69798
638	BIK	22q13.2	1.69905	4.31845	8.55388	1.37393e-08	3.64289e-07	9.8731
57118	CAMK1D	10p13	0.946792	5.72223	8.5451	1.39906e-08	3.69981e-07	9.64814
468	ATF4	22q13.1	-0.840925	8.64376	-8.53594	1.42582e-08	3.76074e-07	9.3464
9126	SMC3	10q25.2	-1.03591	6.57708	-8.52709	1.45214e-08	3.82018e-07	9.46042
57282	SLC4A10	2q24.2	-4.87154	3.66213	-8.51616	1.48535e-08	3.89742e-07	9.75746
1465	CSRP1	1q32.1	0.927397	8.25978	8.50217	1.52905e-08	4.00168e-07	9.3189
57555	NLGN2	17p13.1	1.2199	5.78428	8.4889	1.57169e-08	4.09582e-07	9.54772
3021	H3F3B	17q25.1	-0.676949	10.989	-8.48845	1.57313e-08	4.09582e-07	9.15568
9585	KIF20B	10q23.31	-1.77889	4.114	-8.48175	1.59517e-08	4.1341e-07	9.67094
2091	FBL	19q13.2	-0.755441	7.0946	-8.48149	1.59602e-08	4.1341e-07	9.32266
10449	ACAA2	18q21.1	1.19414	5.61221	8.47606	1.6141e-08	4.17024e-07	9.5375
259266	ASPM	1q31.3	-2.27135	2.98615	-8.45071	1.70139e-08	4.38455e-07	9.59495
10885	WDR3	1p12	-0.956795	6.10127	-8.42446	1.79689e-08	4.61886e-07	9.33887
8992	ATP6V0E1	5q35.1	0.8009	7.64963	8.40937	1.85427e-08	4.75427e-07	9.16571
29123	ANKRD11	16q24.3	-0.887029	7.48933	-8.38476	1.95197e-08	4.99211e-07	9.09088
65108	MARCKSL1	1p35.1	0.847659	8.30892	8.37864	1.97706e-08	5.04349e-07	9.05409
3964	LGALS8	1q43	0.85956	6.58108	8.37599	1.98804e-08	5.05874e-07	9.17606
200879	LIPH	3q27.2	2.22099	4.20429	8.37158	2.00642e-08	5.09269e-07	9.52002
55744	COA1	7p13	-0.953787	5.72197	-8.36401	2.03845e-08	5.16101e-07	9.24555
151246	SGO2	2q33.1	-1.78409	3.21853	-8.35833	2.06278e-08	5.20956e-07	9.48271
7803	PTP4A1	6q12	-1.09951	7.97076	-8.34866	2.10495e-08	5.30279e-07	9.01865
57167	SALL4	20q13.2	1.77784	5.46037	8.3467	2.11361e-08	5.30439e-07	9.31028
7157	TP53	17p13.1	-0.833731	6.25516	-8.34614	2.11609e-08	5.30439e-07	9.11689
10721	POLQ	3q13.33	-1.69907	3.36602	-8.33967	2.14492e-08	5.36337e-07	9.45234
57122	NUP107	12q15	-0.925804	5.87624	-8.33513	2.16544e-08	5.38867e-07	9.15564
4830	NME1	17q21.33	-1.16541	5.57138	-8.33506	2.16571e-08	5.38867e-07	9.2246
23468	CBX5	12q13.13	-0.936744	7.30044	-8.33155	2.1817e-08	5.41513e-07	8.98067
3833	KIFC1	6p21.32	-1.86032	3.51705	-8.31824	2.24342e-08	5.55467e-07	9.30022
3146	HMGB1	13q12.3	-0.863267	8.19921	-8.31596	2.25417e-08	5.55898e-07	8.89533
8318	CDC45	22q11.21	-2.09955	2.73603	-8.31554	2.25617e-08	5.55898e-07	9.40587
2888	GRB14	2q24.3	2.17807	3.91759	8.30286	2.31697e-08	5.6949e-07	9.37671
55651	NHP2	5q35.3	-0.759804	7.9225	-8.29931	2.33431e-08	5.72358e-07	8.88756
8914	TIMELESS	12q13.3	-1.22267	5.51105	-8.28876	2.38661e-08	5.82831e-07	9.07687
84790	TUBA1C	12q13.12	-0.789529	7.78397	-8.28837	2.38856e-08	5.82831e-07	8.85908
79682	CENPU	4q35.1	-1.84256	3.42128	-8.28562	2.40241e-08	5.84798e-07	9.27169
64285	RHBDF1	16p13.3	0.953263	6.61293	8.28339	2.41367e-08	5.86127e-07	8.99187
26960	NBEA	13q13.3	1.37611	5.96865	8.28118	2.4249e-08	5.87442e-07	9.08326
50854	C6orf48	6p21.33	-0.968768	6.07135	-8.26745	2.4959e-08	6.03195e-07	8.96858
5352	PLOD2	3q24	-1.09792	5.98074	-8.2641	2.51356e-08	6.06014e-07	8.99907
90381	TICRR	15q26.1	-2.12593	2.69389	-8.26222	2.52351e-08	6.06963e-07	9.28246
6187	RPS2	16p13.3	-0.657873	11.257	-8.25595	2.55705e-08	6.1357e-07	8.64616
875	CBS	21q22.3	-1.7058	3.72962	-8.25117	2.58292e-08	6.18309e-07	9.21113
8243	SMC1A	Xp11.22	-0.782798	7.3578	-8.24904	2.59451e-08	6.19616e-07	8.80678
57820	CCNB1IP1	14q11.2	-1.21807	4.45959	-8.24739	2.60354e-08	6.20305e-07	9.16306
26020	LRP10	14q11.2	0.683393	8.35517	8.23602	2.66665e-08	6.33848e-07	8.73896
126353	MISP	19p13.3	0.927342	6.56471	8.22042	2.75585e-08	6.53513e-07	8.86363
6196	RPS6KA2	6q27	-1.4291	4.42729	-8.20735	2.83291e-08	6.70213e-07	9.11631
400793	C1orf226	1q23.3	-1.48518	4.69346	-8.20427	2.85136e-08	6.73001e-07	9.09818
4126	MANBA	4q24	0.944317	6.25771	8.19297	2.92026e-08	6.87658e-07	8.85092
91272	BOD1	5q35.2	-0.989893	6.93626	-8.18576	2.96512e-08	6.96596e-07	8.73894
3189	HNRNPH3	10q21.3	-0.944853	7.17326	-8.18136	2.9928e-08	7.01468e-07	8.68263
11130	ZWINT	10q21.1	-1.68653	4.21007	-8.15587	3.15875e-08	7.3865e-07	8.90197
57655	GRAMD1A	19q13.11	1.08495	6.61386	8.09538	3.59139e-08	8.37881e-07	8.58659
1408	CRY2	11p11.2	1.00919	5.72413	8.05068	3.94997e-08	9.19414e-07	8.61322
11231	SEC63	6q21	-0.643066	7.608	-8.03587	4.07674e-08	9.46741e-07	8.33718
6692	SPINT1	15q15.1	0.746653	8.15645	8.03436	4.08991e-08	9.47622e-07	8.31478
1786	DNMT1	19p13.2	-0.803888	6.86753	-8.03041	4.12455e-08	9.53459e-07	8.36564
10360	NPM3	10q24.32	-1.22443	4.21622	-8.01691	4.24525e-08	9.79121e-07	8.7061
780	DDR1	6p21.33	0.718749	9.12894	8.01488	4.26368e-08	9.81132e-07	8.22608
55357	TBC1D2	9q22.33	1.64089	3.96408	8.01047	4.30402e-08	9.88163e-07	8.77501
267	AMFR	16q13	-0.674376	7.36805	-8.00939	4.31395e-08	9.88197e-07	8.30273
9735	KNTC1	12q24.31	-1.27701	4.28828	-7.99331	4.46495e-08	1.02047e-06	8.60727
6324	SCN1B	19q13.11	1.85238	4.10388	7.99216	4.47595e-08	1.02068e-06	8.7394
7068	THRB	3p24.2	-0.985345	5.2677	-7.97991	4.59488e-08	1.04544e-06	8.45819
9871	SEC24D	4q26	-0.739064	7.68787	-7.96109	4.78398e-08	1.08602e-06	8.17064
151648	SGO1	3p24.3	-2.49245	1.67455	-7.95732	4.82281e-08	1.09238e-06	8.63428
25994	HIGD1A	3p22.1	-0.900072	5.93944	-7.95419	4.85532e-08	1.09728e-06	8.37582
388	RHOB	2p24.1	0.799568	8.89105	7.95126	4.88593e-08	1.10173e-06	8.09572
83695	RHNO1	12p13.33	-1.07212	4.99138	-7.94876	4.91214e-08	1.10518e-06	8.4443
10397	NDRG1	8q24.22	0.956334	5.59015	7.93751	5.0322e-08	1.12967e-06	8.35037
84798	C19orf48	19q13.33	-0.830432	6.31398	-7.92737	5.1431e-08	1.15064e-06	8.21506
1476	CSTB	21q22.3	0.819542	7.71783	7.92689	5.14837e-08	1.15064e-06	8.1217
11254	SLC6A14	Xq23	-2.2581	3.37433	-7.92457	5.17407e-08	1.15383e-06	8.58979
55319	TMA16	4q32.2	-1.22807	4.72655	-7.92249	5.19725e-08	1.15645e-06	8.47174
6451	SH3BGRL	Xq21.1	1.12532	8.36274	7.91938	5.23209e-08	1.16164e-06	8.06885
79924	ADM2	22q13.33	-1.73805	3.13124	-7.91737	5.25477e-08	1.16412e-06	8.58134
4925	NUCB2	11p15.1	-0.813857	9.18458	-7.91026	5.33575e-08	1.17947e-06	7.98265
7371	UCK2	1q24.1	-0.944641	5.66841	-7.89951	5.46065e-08	1.20183e-06	8.24786
51330	TNFRSF12A	16p13.3	1.08789	7.50126	7.8995	5.46069e-08	1.20183e-06	8.10282
84501	SPIRE2	16q24.3	0.995782	5.26485	7.87967	5.69897e-08	1.25154e-06	8.30506
54443	ANLN	7p14.2	-1.63934	4.61099	-7.86804	5.84372e-08	1.28055e-06	8.1928
4054	LTBP3	11q13.1	1.04875	6.81127	7.86698	5.85711e-08	1.2807e-06	8.06659
5476	CTSA	20q13.12	0.73554	9.0803	7.86122	5.93023e-08	1.29389e-06	7.894
1033	CDKN3	14q22.2	-1.71664	2.63061	-7.85555	6.00323e-08	1.30472e-06	8.44177
54845	ESRP1	8q22.1	-0.853103	7.71634	-7.85537	6.00568e-08	1.30472e-06	7.92774
10769	PLK2	5q11.2	0.966358	9.45983	7.85318	6.03412e-08	1.30808e-06	7.86333
7298	TYMS	18p11.32	-1.72391	4.57883	-7.8429	6.16956e-08	1.33458e-06	8.33015
55526	DHTKD1	10p14	-0.777311	7.24073	-7.838	6.23519e-08	1.34589e-06	7.91028
5611	DNAJC3	13q32.1	-0.795773	6.34486	-7.82479	6.41571e-08	1.38191e-06	8.01576
55450	CAMK2N1	1p36.12	0.881446	7.82608	7.82177	6.45786e-08	1.38803e-06	7.8668
51646	YPEL5	2p23.1	0.801987	7.05046	7.82029	6.47846e-08	1.3895e-06	7.94847
8479	HIRIP3	16p11.2	-1.40679	3.50932	-7.80948	6.63185e-08	1.41938e-06	8.31106
81610	FAM83D	20q11.23	-1.71335	3.21979	-7.80788	6.65486e-08	1.4213e-06	8.27253
23677	SH3BP4	2q37.2	0.757173	6.95476	7.80561	6.68754e-08	1.42527e-06	7.90803
10103	TSPAN1	1p34.1	0.93722	5.84265	7.79987	6.77131e-08	1.44008e-06	8.06723
146691	TOM1L2	17p11.2	0.881429	6.64138	7.79769	6.80328e-08	1.44262e-06	7.96798
1847	DUSP5	10q25.2	-1.70508	4.13502	-7.79654	6.82022e-08	1.44262e-06	8.28666
7022	TFAP2C	20q13.31	-0.883836	6.86451	-7.79615	6.8261e-08	1.44262e-06	7.89761
1058	CENPA	2p23.3	-2.41463	2.42624	-7.7931	6.87124e-08	1.44913e-06	8.32156
4172	MCM3	6p12.2	-0.873876	6.95972	-7.78837	6.94209e-08	1.46102e-06	7.82801
10202	DHRS2	14q11.2	-2.04888	6.47696	-7.78523	6.98941e-08	1.46792e-06	8.01684
51608	GET4	7p22.3	1.02476	6.2259	7.76486	7.30515e-08	1.53105e-06	7.9283
51542	VPS54	2p15-p14	0.877498	5.90543	7.76075	7.37063e-08	1.54158e-06	7.93032
79094	CHAC1	15q15.1	-4.61855	1.01974	-7.75743	7.42403e-08	1.54954e-06	7.54913
149603	RNF187	1q42.13	-0.800593	6.65715	-7.75278	7.49938e-08	1.56204e-06	7.79061
92815	HIST3H2A	1q42.13	-1.09052	4.20864	-7.7403	7.70542e-08	1.60165e-06	8.05561
389	RHOC	1p13.2	0.816845	9.18565	7.73788	7.74605e-08	1.60679e-06	7.61538
4605	MYBL2	20q13.12	-1.39583	5.52656	-7.73569	7.78304e-08	1.61115e-06	7.77133
55755	CDK5RAP2	9q33.2	-1.00582	5.4628	-7.73465	7.80063e-08	1.61149e-06	7.89114
55625	ZDHHC7	16q24.1	0.946734	7.87077	7.73307	7.82752e-08	1.61215e-06	7.68481
132720	FAM241A	4q25	-1.12068	5.55169	-7.73218	7.84272e-08	1.61215e-06	7.88499
26528	DAZAP1	19p13.3	-0.723009	6.77906	-7.73166	7.85167e-08	1.61215e-06	7.72578
987	LRBA	4q31.3	0.743099	8.37813	7.73071	7.86785e-08	1.61219e-06	7.63475
25840	METTL7A	12q13.12	-2.19587	2.61789	-7.7291	7.8954e-08	1.61456e-06	8.17872
5064	PALM	19p13.3	0.993442	5.66488	7.72311	7.999e-08	1.62979e-06	7.87998
10512	SEMA3C	7q21.11	-0.709407	8.65402	-7.72293	8.00213e-08	1.62979e-06	7.60856
55165	CEP55	10q23.33	-1.70901	3.3012	-7.71806	8.08738e-08	1.64384e-06	8.0271
51512	GTSE1	22q13.31	-1.80649	2.96106	-7.71674	8.11066e-08	1.64526e-06	8.0762
4292	MLH1	3p22.2	-1.07696	5.15257	-7.71433	8.1534e-08	1.65061e-06	7.93219
54865	GPATCH4	1q22-q23.1	-1.00009	5.66169	-7.71249	8.18614e-08	1.65253e-06	7.88039
7089	TLE2	19p13.3	1.00729	6.31831	7.71196	8.19558e-08	1.65253e-06	7.77484
262	AMD1	6q21	-1.03692	5.51289	-7.69079	8.58244e-08	1.72516e-06	7.83977
6567	SLC16A2	Xq13.2	0.780147	6.55318	7.69039	8.58995e-08	1.72516e-06	7.70967
3978	LIG1	19q13.33	-0.885723	5.43808	-7.6845	8.70085e-08	1.74397e-06	7.8231
23022	PALLD	4q32.3	0.860455	6.39582	7.67285	8.9249e-08	1.78533e-06	7.71837
10972	TMED10	14q24.3	-0.588941	9.11755	-7.67038	8.97312e-08	1.79143e-06	7.45916
4253	MIA2	14q21.1	-0.936245	5.65916	-7.66381	9.10276e-08	1.81373e-06	7.72862
22862	FNDC3A	13q14.2	-0.874424	5.64301	-7.65861	9.20686e-08	1.83086e-06	7.72063
64105	CENPK	5q12.3	-1.82347	2.01046	-7.6494	9.39398e-08	1.8644e-06	8.0203
414149	ACBD7	10p13	-1.55767	3.61335	-7.64231	9.54063e-08	1.88979e-06	7.96036
995	CDC25C	5q31.2	-2.00239	1.58644	-7.63816	9.62764e-08	1.90104e-06	7.99389
11168	PSIP1	9p22.3	-0.962632	6.11396	-7.63712	9.64953e-08	1.90104e-06	7.5972
57510	XPO5	6p21.1	-0.722376	6.91107	-7.63601	9.67308e-08	1.90104e-06	7.52596
302	ANXA2	15q22.2	0.878309	8.02762	7.63574	9.67886e-08	1.90104e-06	7.48271
6185	RPN2	20q11.23	-0.58578	9.59715	-7.63514	9.69148e-08	1.90104e-06	7.35942
58513	EPS15L1	19p13.11	-0.982424	5.67313	-7.63201	9.75818e-08	1.91041e-06	7.66983
58516	SINHCAF	12p11.21	-0.841975	5.6494	-7.62342	9.94328e-08	1.94288e-06	7.63145
283431	GAS2L3	12q23.1	-1.97953	2.66972	-7.61625	1.01006e-07	1.9698e-06	7.93939
345079	SOWAHB	4q21.1	1.43799	4.6248	7.60223	1.04157e-07	2.02735e-06	7.86912
8805	TRIM24	7q33-q34	0.756653	7.02261	7.59617	1.0555e-07	2.05051e-06	7.44714
54069	MIS18A	21q22.11	-1.4463	4.02057	-7.59341	1.06191e-07	2.05759e-06	7.82541
2739	GLO1	6p21.2	-0.607161	8.07651	-7.59244	1.06417e-07	2.05759e-06	7.33556
9021	SOCS3	17q25.3	1.22152	5.41514	7.59198	1.06525e-07	2.05759e-06	7.69578
51741	WWOX	16q23.1-q23.2	0.850559	6.37646	7.58951	1.07104e-07	2.06482e-06	7.51989
784	CACNB3	12q13.12	0.884832	6.31551	7.58793	1.07474e-07	2.06801e-06	7.51334
53635	PTOV1	19q13.33	0.820677	6.86911	7.57803	1.09837e-07	2.10946e-06	7.41749
65250	CPLANE1	5p13.2	1.6179	4.35996	7.57203	1.11292e-07	2.13333e-06	7.81617
1933	EEF1B2	2q33.3	-0.741183	8.40636	-7.56582	1.12821e-07	2.15855e-06	7.25487
11320	MGAT4A	2q11.2	0.976247	7.47506	7.56411	1.13246e-07	2.16143e-06	7.35164
3703	STT3A	11q24.2	-0.644126	7.76781	-7.56349	1.13399e-07	2.16143e-06	7.27985
54820	NDE1	16p13.11	-1.02302	5.02915	-7.56111	1.13994e-07	2.16867e-06	7.55619
55151	TMEM38B	9q31.2	-1.38774	3.86268	-7.55613	1.15248e-07	2.18476e-06	7.76581
80324	PUS1	12q24.33	-1.24264	4.60696	-7.55604	1.15272e-07	2.18476e-06	7.6821
285362	SUMF1	3p26.1	0.80766	6.76262	7.53818	1.19891e-07	2.26806e-06	7.35583
51060	TXNDC12	1p32.3	-0.738395	6.43197	-7.53099	1.21803e-07	2.29991e-06	7.32365
79570	NKAIN1	1p35.2	-1.54104	4.13912	-7.52844	1.22488e-07	2.30853e-06	7.73986
168544	ZNF467	7q36.1	1.07372	5.78279	7.51635	1.25794e-07	2.36643e-06	7.42542
1021	CDK6	7q21.2	1.85936	3.89808	7.49911	1.30668e-07	2.45354e-06	7.69523
51602	NOP58	2q33.1	-0.735814	6.73898	-7.49725	1.31205e-07	2.45906e-06	7.23531
7905	REEP5	5q22.2	0.604525	8.81742	7.49151	1.32878e-07	2.4858e-06	7.07416
149563	SRARP	1p36.13	2.34974	2.86694	7.4873	1.34117e-07	2.50434e-06	7.59193
115825	WDFY2	13q14.3	-1.07218	4.77866	-7.48579	1.34566e-07	2.50674e-06	7.44852
708	C1QBP	17p13.2	-0.846847	6.29442	-7.4852	1.34742e-07	2.50674e-06	7.25166
115106	HAUS1	18q21.1	-1.2188	3.97175	-7.47298	1.38426e-07	2.57055e-06	7.54706
85004	RERG	12p12.3	-2.2723	3.32192	-7.46442	1.41068e-07	2.6148e-06	7.60988
1831	TSC22D3	Xq22.3	-0.643223	7.65596	-7.45339	1.44552e-07	2.67448e-06	7.03453
346389	MACC1	7p21.1	1.77551	4.3439	7.45125	1.45238e-07	2.67764e-06	7.59104
10946	SF3A3	1p34.3	-0.694731	6.93399	-7.4512	1.45253e-07	2.67764e-06	7.0982
7045	TGFBI	5q31.1	-1.82287	3.20613	-7.44276	1.47991e-07	2.72315e-06	7.56998
3006	HIST1H1C	6p22.2	0.839258	6.5882	7.43708	1.49866e-07	2.75264e-06	7.14798
10213	PSMD14	2q24.2	-0.735501	6.76962	-7.43228	1.51467e-07	2.77699e-06	7.08006
26011	TENM4	11q14.1	1.64924	4.63769	7.42509	1.53897e-07	2.81392e-06	7.42431
8884	SLC5A6	2p23.3	0.649174	7.27949	7.42468	1.54039e-07	2.81392e-06	7.03675
1841	DTYMK	2q37.3	-1.18342	4.21538	-7.41686	1.5673e-07	2.85792e-06	7.34698
23204	ARL6IP1	16p12.3	-0.655852	8.36935	-7.41069	1.5889e-07	2.89208e-06	6.8939
57405	SPC25	2q24.3	-2.41313	1.31416	-7.40793	1.59866e-07	2.89988e-06	7.48031
84823	LMNB2	19p13.3	-0.782642	6.34457	-7.40728	1.60095e-07	2.89988e-06	7.05305
3183	HNRNPC	14q11.2	-0.566621	9.43647	-7.40704	1.6018e-07	2.89988e-06	6.84251
55343	SLC35C1	11p11.2	1.09347	5.85081	7.40119	1.62273e-07	2.93252e-06	7.19928
813	CALU	7q32.1	-0.678683	7.53324	-7.4003	1.62594e-07	2.93308e-06	6.93784
284207	METRNL	17q25.3	0.92841	6.98045	7.39907	1.63037e-07	2.93583e-06	7.00204
3182	HNRNPAB	5q35.3	-0.677918	7.86205	-7.38377	1.68673e-07	3.03191e-06	6.88423
990	CDC6	17q21.2	-1.73811	3.30584	-7.37823	1.7076e-07	3.06397e-06	7.39291
11340	EXOSC8	13q13.3	-1.1175	4.26241	-7.37031	1.7379e-07	3.10618e-06	7.26457
114049	BUD23	7q11.23	-0.879112	6.09654	-7.37007	1.73884e-07	3.10618e-06	7.02076
54205	CYCS	7p15.3	-0.920598	6.19712	-7.36968	1.74035e-07	3.10618e-06	7.03105
55690	PACS1	11q13.1-q13.2	0.660903	7.97021	7.36422	1.76161e-07	3.13391e-06	6.83989
146909	KIF18B	17q21.31	-2.36348	1.61053	-7.36343	1.7647e-07	3.13391e-06	7.39607
22925	PLA2R1	2q24.2	1.12073	5.05905	7.36331	1.76519e-07	3.13391e-06	7.22402
3728	JUP	17q21.2	0.733081	8.89272	7.34837	1.82485e-07	3.23251e-06	6.74832
22929	SEPHS1	10p13	-0.706108	6.88473	-7.34781	1.82712e-07	3.23251e-06	6.86956
55884	WSB2	12q24.23	0.70367	6.45094	7.34583	1.83517e-07	3.24106e-06	6.9435
653820	FAM72B	1p11.2	-2.31047	1.47413	-7.34289	1.84723e-07	3.25668e-06	7.32004
10026	PIGK	1p31.1	-1.22269	4.14504	-7.33852	1.86528e-07	3.28276e-06	7.23294
3615	IMPDH2	3p21.31	-0.635909	7.89757	-7.33768	1.86878e-07	3.2832e-06	6.76638
84930	MASTL	10p12.1	-1.30607	4.61448	-7.33442	1.8824e-07	3.30139e-06	7.15135
94241	TP53INP1	8q22.1	1.11716	7.32814	7.32253	1.93293e-07	3.38414e-06	6.87093
5557	PRIM1	12q13.3	-2.09521	3.15417	-7.32035	1.94235e-07	3.39328e-06	7.2789
23255	MTCL1	18p11.22	0.959408	5.95836	7.31977	1.94487e-07	3.39328e-06	6.99675
3939	LDHA	11p15.1	-0.612697	9.03937	-7.31484	1.96635e-07	3.42484e-06	6.6601
1605	DAG1	3p21.31	0.648826	7.78141	7.31219	1.97801e-07	3.43921e-06	6.73185
8659	ALDH4A1	1p36.13	1.04479	7.10212	7.30238	2.02179e-07	3.50929e-06	6.77346
8531	YBX3	12p13.2	-0.747753	6.54947	-7.2987	2.03845e-07	3.53215e-06	6.81151
4584	MUC3A	7q22.1	3.61755	2.73722	7.2936	2.06181e-07	3.5665e-06	6.89408
2673	GFPT1	2p13.3	-0.637831	7.83552	-7.29279	2.06556e-07	3.56689e-06	6.66945
3735	KARS	16q23.1	-0.585757	7.84465	-7.29071	2.07515e-07	3.57733e-06	6.66128
402778	IFITM10	11p15.5	-1.58026	4.53986	-7.28204	2.11575e-07	3.64112e-06	7.12958
56134	PCDHAC2	5q31.3	1.93051	3.43086	7.27964	2.12711e-07	3.64786e-06	7.22676
29959	NRBP1	2p23.3	0.733058	8.78473	7.27904	2.12999e-07	3.64786e-06	6.59954
6558	SLC12A2	5q23.3	1.14677	6.66603	7.27843	2.13289e-07	3.64786e-06	6.81408
1434	CSE1L	20q13.13	-0.684719	7.50906	-7.27817	2.13412e-07	3.64786e-06	6.65672
26271	FBXO5	6q25.2	-1.69869	2.91959	-7.2774	2.13781e-07	3.648e-06	7.19286
1364	CLDN4	7q11.23	0.659305	8.04708	7.27654	2.14192e-07	3.64885e-06	6.63205
79932	KIAA0319L	1p34.3	0.572263	7.96874	7.27231	2.16227e-07	3.67731e-06	6.61936
5296	PIK3R2	19p13.11	0.683907	7.34629	7.26167	2.21432e-07	3.7595e-06	6.65267
672	BRCA1	17q21.31	-1.58544	3.50662	-7.25978	2.22371e-07	3.76912e-06	7.08063
283987	HID1	17q25.1	0.665274	8.15828	7.25205	2.2625e-07	3.82385e-06	6.56318
4953	ODC1	2p25.1	-0.733093	6.55466	-7.25184	2.26357e-07	3.82385e-06	6.69377
9536	PTGES	9q34.11	-2.7387	3.24227	-7.25051	2.27035e-07	3.8289e-06	7.16434
11064	CNTRL	9q33.2	-1.77236	3.19484	-7.24916	2.27718e-07	3.83402e-06	7.12455
84532	ACSS1	20p11.21	0.89139	6.91796	7.24382	2.30461e-07	3.87183e-06	6.65361
5167	ENPP1	6q23.2	-0.721257	6.80116	-7.2433	2.30731e-07	3.87183e-06	6.63129
6626	SNRPA	19q13.2	-0.82926	6.14162	-7.24068	2.32086e-07	3.88812e-06	6.69302
84525	HOPX	4q12	2.73303	2.52949	7.23586	2.34604e-07	3.9238e-06	6.86508
10263	CDK2AP2	11q13.2	-0.873655	5.51614	-7.23204	2.3662e-07	3.95098e-06	6.7628
23621	BACE1	11q23.3	0.793981	6.45427	7.21424	2.46258e-07	4.10512e-06	6.65225
3726	JUNB	19p13.13	0.999011	6.29987	7.19388	2.57774e-07	4.29e-06	6.642
3880	KRT19	17q21.2	0.651126	11.0937	7.19311	2.58221e-07	4.29038e-06	6.31572
678	ZFP36L2	2p21	1.13418	8.80998	7.19011	2.59965e-07	4.31227e-06	6.40244
6907	TBL1X	Xp22.31-p22.2	-0.655467	7.55525	-7.18703	2.61771e-07	4.3351e-06	6.42999
8673	VAMP8	2p11.2	0.748394	7.07327	7.18358	2.63805e-07	4.36164e-06	6.52047
2530	FUT8	14q23.3	0.67932	7.92638	7.18093	2.65382e-07	4.38053e-06	6.43241
131870	NUDT16	3q22.1	0.684322	7.00125	7.17873	2.66702e-07	4.38946e-06	6.48686
653784	MZT2A	2q21.1	-1.01199	4.61366	-7.17814	2.67053e-07	4.38946e-06	6.79003
8438	RAD54L	1p34.1	-1.7798	2.0864	-7.17785	2.67226e-07	4.38946e-06	7.01144
94239	H2AFV	7p13	-0.646085	7.37561	-7.17708	2.67692e-07	4.38998e-06	6.42641
5356	PLRG1	4q31.3	-0.746988	5.84676	-7.17567	2.68541e-07	4.39676e-06	6.61012
3799	KIF5B	10p11.22	-0.742943	7.76471	-7.17225	2.70612e-07	4.4235e-06	6.39264
55320	MIS18BP1	14q21.2	-1.32519	4.50006	-7.16418	2.75568e-07	4.49724e-06	6.75985
3921	RPSA	3p22.1	-0.529559	9.57087	-7.16238	2.76686e-07	4.50277e-06	6.28062
55723	ASF1B	19p13.12	-1.35557	3.73602	-7.16179	2.77054e-07	4.50277e-06	6.80489
51645	PPIL1	6p21.2	-0.94287	5.28816	-7.16149	2.77245e-07	4.50277e-06	6.67933
6749	SSRP1	11q12.1	-0.626096	7.23453	-7.15535	2.811e-07	4.55806e-06	6.3887
147798	TMC4	19q13.42	0.823863	7.07089	7.14899	2.85158e-07	4.61645e-06	6.44022
9114	ATP6V0D1	16q22.1	0.650684	7.16826	7.14177	2.8983e-07	4.68457e-06	6.40563
377	ARF3	12q13.12	0.538209	9.02673	7.13123	2.96796e-07	4.78951e-06	6.25091
10957	PNRC1	6q15	1.16834	5.63184	7.12847	2.98652e-07	4.81178e-06	6.58888
4329	ALDH6A1	14q24.3	0.757741	6.1177	7.12357	3.01966e-07	4.85742e-06	6.46837
6542	SLC7A2	8p22	-0.694161	8.78762	-7.1215	3.03384e-07	4.87248e-06	6.23133
1176	AP3S1	5q22.3-q23.1	-0.720553	6.47249	-7.12051	3.04061e-07	4.8756e-06	6.42252
5033	P4HA1	10q22.1	-0.866147	6.21538	-7.11698	3.06488e-07	4.90672e-06	6.43087
9133	CCNB2	15q22.2	-1.48689	3.39683	-7.11133	3.10424e-07	4.96188e-06	6.69752
79590	MRPL24	1q23.1	-0.742614	6.24364	-7.10738	3.13205e-07	4.99841e-06	6.40732
55355	HJURP	2q37.1	-1.83811	2.73051	-7.10179	3.1718e-07	5.05387e-06	6.79113
60598	KCNK15	20q13.12	-1.36374	4.28415	-7.09947	3.18844e-07	5.07239e-06	6.76164
51087	YBX2	17p13.1	-1.22929	3.85437	-7.09452	3.22435e-07	5.12144e-06	6.70149
9351	SLC9A3R2	16p13.3	0.58444	7.86978	7.08187	3.31783e-07	5.26166e-06	6.18566
7464	CORO2A	9q22.33	1.23212	4.44641	7.08023	3.33015e-07	5.27292e-06	6.63654
7407	VARS	6p21.33	-0.916337	5.6079	-7.07569	3.36446e-07	5.31325e-06	6.42183
91057	CCDC34	11p14.1	-1.65002	3.44776	-7.07547	3.36614e-07	5.31325e-06	6.75445
23160	WDR43	2p23.2	-0.748576	6.48787	-7.06704	3.43094e-07	5.40708e-06	6.31087
516	ATP5MC1	17q21.32	-0.899211	5.93464	-7.0647	3.44916e-07	5.42732e-06	6.3536
196383	RILPL2	12q24.31	1.15601	4.54387	7.06123	3.47635e-07	5.4578e-06	6.60887
64798	DEPTOR	8q24.12	-1.46845	4.33585	-7.06086	3.47933e-07	5.4578e-06	6.61468
54621	VSIG10	12q24.23	0.690544	6.22136	7.05987	3.48713e-07	5.46155e-06	6.30338
2317	FLNB	3p14.3	-0.610555	8.83521	-7.05819	3.50039e-07	5.47382e-06	6.08267
374443	LOC374443	12p13.31	1.23239	4.30048	7.0558	3.51941e-07	5.49506e-06	6.63202
55388	MCM10	10p13	-1.8603	2.32112	-7.0548	3.52735e-07	5.49896e-06	6.72238
116442	RAB39B	Xq28	-1.2136	4.37742	-7.05182	3.55126e-07	5.52771e-06	6.54449
2040	STOM	9q33.2	-1.04038	6.34273	-7.04793	3.5827e-07	5.55721e-06	6.3192
641	BLM	15q26.1	-1.81783	2.92369	-7.04747	3.58636e-07	5.55721e-06	6.71775
10198	MPHOSPH9	12q24.31	-1.00011	4.69773	-7.04743	3.58671e-07	5.55721e-06	6.49132
3955	LFNG	7p22.3	1.07762	5.829	7.0451	3.60569e-07	5.57806e-06	6.36605
134266	GRPEL2	5q32	-1.14642	4.13741	-7.03358	3.70106e-07	5.71683e-06	6.54003
124359	CDYL2	16q23.2	0.655083	7.32236	7.03081	3.72438e-07	5.74408e-06	6.11447
5768	QSOX1	1q25.2	0.806642	8.95853	7.00723	3.92903e-07	6.05047e-06	5.96339
6632	SNRPD1	18q11.2	-0.89773	5.99268	-7.00349	3.96256e-07	6.09281e-06	6.19981
8831	SYNGAP1	6p21.32	0.98504	5.22056	6.99086	4.07792e-07	6.26066e-06	6.33265
9184	BUB3	10q26.13	-0.851073	7.5137	-6.98454	4.13688e-07	6.34154e-06	5.9828
6839	SUV39H1	Xp11.23	-1.43918	3.28888	-6.98304	4.15102e-07	6.35358e-06	6.55368
53832	IL20RA	6q23.3	-1.23138	4.0836	-6.97629	4.21519e-07	6.44203e-06	6.47261
3977	LIFR	5p13.1	1.0032	5.26583	6.97274	4.24942e-07	6.48454e-06	6.2869
4521	NUDT1	7p22.3	-1.6448	3.02567	-6.9689	4.28668e-07	6.53154e-06	6.53218
10625	IVNS1ABP	1q25.3	-0.824162	6.69557	-6.96524	4.32254e-07	6.57625e-06	6.02657
56834	GPR137	11q13.1	1.04388	4.9825	6.95485	4.42598e-07	6.7235e-06	6.30053
6493	SIM2	21q22.13	1.32148	4.40649	6.95373	4.4373e-07	6.73058e-06	6.42379
51175	TUBE1	6q21	-2.3361	2.58404	-6.95109	4.46401e-07	6.76094e-06	6.51474
7873	MANF	3p21.2	-0.983772	5.72405	-6.94764	4.49925e-07	6.80411e-06	6.10437
11073	TOPBP1	3q22.1	-0.761715	6.17089	-6.944	4.53678e-07	6.8506e-06	6.03335
57463	AMIGO1	1p13.3	1.23005	4.62319	6.94207	4.55671e-07	6.87043e-06	6.3925
10549	PRDX4	Xp22.11	-0.8998	6.8606	-6.9409	4.56888e-07	6.87852e-06	5.9521
80119	PIF1	15q22.31	-2.01065	0.744905	-6.9365	4.61492e-07	6.93749e-06	6.47153
10133	OPTN	10p13	1.17766	4.68856	6.93138	4.66917e-07	7.0086e-06	6.35979
5869	RAB5B	12q13.2	0.597926	8.33096	6.92832	4.70179e-07	7.0471e-06	5.8182
2517	FUCA1	1p36.11	0.716899	6.48749	6.92413	4.74697e-07	7.10428e-06	5.98876
84300	UQCC2	6p21.31	-1.03329	4.54156	-6.9229	4.76035e-07	7.11376e-06	6.23787
10130	PDIA6	2p25.1	-0.587738	8.82374	-6.92176	4.77269e-07	7.12167e-06	5.76361
389337	ARHGEF37	5q32	1.30646	4.62112	6.91886	4.80437e-07	7.15837e-06	6.30802
253725	WASHC2C	10q11.22	0.92307	5.73664	6.91574	4.83867e-07	7.18935e-06	6.08546
2627	GATA6	18q11.2	1.48027	3.75551	6.91568	4.8394e-07	7.18935e-06	6.42198
5425	POLD2	7p13	-0.823634	5.95432	-6.91143	4.88652e-07	7.2487e-06	5.97785
57419	SLC24A3	20p11.23	0.679359	6.80959	6.90311	4.98029e-07	7.37696e-06	5.86169
112	ADCY6	12q13.12	0.689501	7.34414	6.89955	5.0209e-07	7.41783e-06	5.8076
54478	PIMREG	17p13.2	-2.13554	1.13034	-6.89884	5.029e-07	7.41783e-06	6.39062
54793	KCTD9	8p21.2	-0.980119	4.94625	-6.89877	5.02991e-07	7.41783e-06	6.11681
10528	NOP56	20p13	-0.893108	6.548	-6.8937	5.0884e-07	7.49315e-06	5.88799
8612	PLPP2	19p13.3	0.935961	5.97244	6.89096	5.1204e-07	7.5293e-06	5.9962
790	CAD	2p23.3	-0.765859	6.52461	-6.8868	5.1693e-07	7.59016e-06	5.85341
154313	CFAP206	6q15	1.57114	3.67363	6.88432	5.19876e-07	7.62234e-06	6.35437
4267	CD99	Xp22.33	-0.569874	7.79557	-6.87398	5.32313e-07	7.79336e-06	5.7011
5339	PLEC	8q24.3	0.844888	8.99185	6.86832	5.39253e-07	7.88356e-06	5.63949
2237	FEN1	11q12.2	-1.07162	5.21589	-6.86536	5.42917e-07	7.90997e-06	5.97071
540	ATP7B	13q14.3	0.886317	5.54319	6.86534	5.42943e-07	7.90997e-06	5.98689
406991	MIR21	17q23.1	2.13258	3.77843	6.86496	5.43409e-07	7.90997e-06	6.32843
9531	BAG3	10q26.11	0.819519	8.64706	6.86207	5.4702e-07	7.95108e-06	5.64978
5984	RFC4	3q27.3	-1.19719	4.13585	-6.86072	5.48705e-07	7.9641e-06	6.11047
60674	GAS5	1q25.1	-0.790126	8.01889	-6.85194	5.59853e-07	8.11425e-06	5.64428
5902	RANBP1	22q11.21	-0.809752	6.23962	-6.841	5.74056e-07	8.30819e-06	5.78035
4502	MT2A	16q13	0.852229	7.02531	6.83594	5.80758e-07	8.39316e-06	5.65048
10456	HAX1	1q21.3	-0.7212	7.07347	-6.83128	5.86999e-07	8.47124e-06	5.65811
58473	PLEKHB1	11q13.4	1.31196	4.58538	6.82498	5.95534e-07	8.58214e-06	6.11295
1728	NQO1	16q22.1	0.528732	9.98085	6.8242	5.966e-07	8.58526e-06	5.49248
29841	GRHL1	2p25.1	-1.18897	5.16581	-6.82292	5.98353e-07	8.59823e-06	5.91319
51569	UFM1	13q13.3	-0.787378	6.15068	-6.81517	6.09097e-07	8.7402e-06	5.76114
91523	PCED1B	12q13.11	-1.30314	3.46561	-6.81184	6.13758e-07	8.79459e-06	6.12483
22995	CEP152	15q21.1	-1.81233	2.27882	-6.79677	6.35375e-07	9.09145e-06	6.1777
372	ARCN1	11q23.3	-0.547185	8.88917	-6.78425	6.53925e-07	9.34363e-06	5.44171
3797	KIF3C	2p23.3	1.09372	5.21441	6.77675	6.65286e-07	9.49254e-06	5.87406
175	AGA	4q34.3	-0.96795	4.89372	-6.77452	6.68717e-07	9.52804e-06	5.85219
129080	EMID1	22q12.2	1.25123	4.27673	6.77155	6.73294e-07	9.57974e-06	6.0173
113791	PIK3IP1	22q12.2	0.918976	5.81414	6.7702	6.75397e-07	9.59615e-06	5.77861
4603	MYBL1	8q13.1	-3.29238	1.38857	-6.76323	6.86303e-07	9.73741e-06	5.92156
57674	RNF213	17q25.3	0.664401	7.34543	6.76249	6.87488e-07	9.74054e-06	5.49702
957	ENTPD5	14q24.3	0.827095	5.81148	6.75964	6.92011e-07	9.7909e-06	5.69936
375775	PNPLA7	9q34.3	1.20696	4.1977	6.75081	7.06223e-07	9.978e-06	5.94705
23404	EXOSC2	9q34.12	-0.846487	4.80551	-6.7487	7.09655e-07	1.00125e-05	5.79041
285368	PRRT3	3p25.3	0.788336	6.41053	6.7335	7.34955e-07	1.0355e-05	5.53433
56005	MYDGF	19p13.3	-0.812551	6.47016	-6.73244	7.36751e-07	1.03658e-05	5.50569
90427	BMF	15q15.1	0.947617	5.04402	6.72814	7.44085e-07	1.04544e-05	5.70113
54887	UHRF1BP1	6p21.31	-0.740834	5.70035	-6.72283	7.53259e-07	1.05686e-05	5.56775
899	CCNF	16p13.3	-0.842044	5.61491	-6.71621	7.64845e-07	1.07163e-05	5.53686
56942	CMC2	16q23.2	-0.861863	5.42038	-6.71492	7.67138e-07	1.07336e-05	5.61499
26018	LRIG1	3p14.1	-0.773354	5.77651	-6.71306	7.70432e-07	1.07647e-05	5.55486
1345	COX6C	8q22.2	-0.61731	8.67797	-6.70678	7.81673e-07	1.09067e-05	5.27853
51734	MSRB1	16p13.3	0.814538	5.88238	6.70585	7.83364e-07	1.09152e-05	5.58327
60436	TGIF2	20q11.23	-0.827426	5.4716	-6.70413	7.86473e-07	1.09369e-05	5.59974
9837	GINS1	20p11.21	-1.23395	4.22996	-6.7038	7.87083e-07	1.09369e-05	5.75005
9223	MAGI1	3p14.1	0.844508	6.40911	6.70302	7.88498e-07	1.09415e-05	5.47875
1201	CLN3	16p12.1	0.658007	6.86831	6.70043	7.93221e-07	1.09919e-05	5.3837
55686	MREG	2q35	-0.847684	6.44462	-6.69561	8.02105e-07	1.10998e-05	5.45867
3760	KCNJ3	2q24.1	1.55351	4.4379	6.68424	8.23447e-07	1.13796e-05	5.78065
9725	TMEM63A	1q42.12	0.823743	5.4827	6.68274	8.26322e-07	1.14037e-05	5.58723
54910	SEMA4C	2q11.2	1.14532	8.29548	6.67724	8.36886e-07	1.15337e-05	5.22842
116138	KLHDC3	6p21.1	0.612764	7.35124	6.67488	8.41468e-07	1.15782e-05	5.28409
4719	NDUFS1	2q33.3	-0.57191	7.27391	-6.6744	8.42403e-07	1.15782e-05	5.27951
25879	DCAF13	8q22.3	-0.603033	6.61198	-6.67085	8.49337e-07	1.16576e-05	5.35148
1632	ECI1	16p13.3	-0.747052	6.30384	-6.66747	8.56005e-07	1.17332e-05	5.35406
9917	FAM20B	1q25.2	-0.615603	6.85021	-6.66447	8.61975e-07	1.17879e-05	5.29734
1431	CS	12q13.3	-0.549081	7.79556	-6.66429	8.62333e-07	1.17879e-05	5.21528
79762	C1orf115	1q41	1.0808	5.34257	6.66157	8.67772e-07	1.1845e-05	5.54212
83463	MXD3	5q35.3	-1.50285	3.10015	-6.66104	8.6885e-07	1.1845e-05	5.78604
200315	APOBEC3A	22q13.1	4.02364	0.97409	6.65383	8.83465e-07	1.2028e-05	5.21002
6535	SLC6A8	Xq28	1.117	4.80019	6.64674	8.98087e-07	1.22106e-05	5.6184
83641	FAM107B	10p13	0.645958	6.74174	6.64566	9.00331e-07	1.22247e-05	5.27717
57153	SLC44A2	19p13.2	0.520449	8.47806	6.63838	9.15647e-07	1.24159e-05	5.1185
25870	SUMF2	7p11.2	-0.535308	7.63661	-6.63528	9.22245e-07	1.24886e-05	5.15882
8878	SQSTM1	5q35.3	0.620972	8.84262	6.63298	9.27181e-07	1.25387e-05	5.09806
7705	ZNF146	19q13.12	-0.5915	7.45253	-6.62923	9.35271e-07	1.26312e-05	5.15742
51659	GINS2	16q24.1	-1.41443	4.46719	-6.62833	9.37218e-07	1.26405e-05	5.50884
5933	RBL1	20q11.23	-1.30331	3.97492	-6.62597	9.42362e-07	1.2693e-05	5.63985
89958	SAPCD2	9q34.3	-0.743279	6.58854	-6.61748	9.61102e-07	1.29282e-05	5.18927
55034	MOCOS	18q12.2	-1.72762	2.97412	-6.61538	9.65788e-07	1.29739e-05	5.76859
10483	SEC23B	20p11.23	-0.574358	7.57141	-6.61404	9.68796e-07	1.2997e-05	5.11298
50807	ASAP1	8q24.21-q24.22	0.826762	6.05529	6.61297	9.71205e-07	1.30121e-05	5.31556
6525	SMTN	22q12.2	-1.02365	4.70439	-6.61002	9.77894e-07	1.30844e-05	5.47796
54972	TMEM132A	11q12.2	0.80964	7.97736	6.6072	9.84313e-07	1.31528e-05	5.08466
28996	HIPK2	7q34	0.636138	6.81983	6.60173	9.96877e-07	1.33031e-05	5.19927
284403	WDR62	19q13.12	-2.21814	2.61168	-6.59021	1.0239e-06	1.36418e-05	5.70253
4477	MSMB	10q11.22	-2.19194	2.97832	-6.58977	1.02496e-06	1.36418e-05	5.71487
93129	ORAI3	16p11.2	0.884969	5.40178	6.57273	1.06637e-06	1.41743e-05	5.35246
54458	PRR13	12q13.13	0.657613	6.98207	6.57018	1.0727e-06	1.42398e-05	5.10755
2146	EZH2	7q36.1	-0.843258	5.31612	-6.56417	1.08781e-06	1.44213e-05	5.2446
55379	LRRC59	17q21.33	-0.634039	7.61333	-6.56258	1.09184e-06	1.44558e-05	4.99508
1837	DTNA	18q12.1	0.672376	6.63388	6.56192	1.0935e-06	1.44588e-05	5.11429
116028	RMI2	16p13.13	-1.1145	4.31104	-6.55831	1.10273e-06	1.45617e-05	5.40073
10212	DDX39A	19p13.12	-0.846955	4.74848	-6.55661	1.10711e-06	1.46005e-05	5.33444
7342	UBP1	3p22.3	0.809622	7.9397	6.55346	1.11526e-06	1.46888e-05	4.96398
5376	PMP22	17p12	1.54384	6.79735	6.55032	1.12344e-06	1.47773e-05	5.14666
9149	DYRK1B	19q13.2	0.987198	5.04662	6.54973	1.12497e-06	1.47783e-05	5.35792
146880	ARHGAP27P1	17q24.1	0.948768	5.52051	6.54632	1.13394e-06	1.48768e-05	5.24814
8722	CTSF	11q13.2	0.894152	5.24555	6.5435	1.1414e-06	1.49552e-05	5.28191
91942	NDUFAF2	5q12.1	-1.19026	4.31078	-6.53902	1.15338e-06	1.50926e-05	5.42949
1478	CSTF2	Xq22.1	-0.822543	5.25722	-6.53284	1.1701e-06	1.52915e-05	5.20295
3998	LMAN1	18q21.32	-0.636156	7.41828	-6.53148	1.17381e-06	1.53202e-05	4.93319
55827	DCAF6	1q24.2	0.578138	7.1602	6.53074	1.17585e-06	1.5327e-05	4.97718
7357	UGCG	9q31.3	-0.864499	5.41491	-6.52514	1.19129e-06	1.55082e-05	5.21534
10038	PARP2	14q11.2	-1.01772	4.29672	-6.52421	1.19389e-06	1.55221e-05	5.32757
57326	PBXIP1	1q21.3	0.661912	7.39143	6.52307	1.19705e-06	1.55431e-05	4.94105
4522	MTHFD1	14q23.3	-0.780804	6.56304	-6.51274	1.22624e-06	1.59017e-05	4.96281
5364	PLXNB1	3p21.31	0.876807	6.96702	6.51208	1.22812e-06	1.59057e-05	4.9661
29957	SLC25A24	1p13.3	-0.632313	8.23041	-6.50803	1.23979e-06	1.60363e-05	4.83684
51474	LIMA1	12q13.12	0.733919	6.34412	6.49866	1.2672e-06	1.63699e-05	4.99322
1119	CHKA	11q13.2	0.662111	6.10646	6.49675	1.27286e-06	1.6422e-05	5.009
79624	ARMT1	6q25.1	-0.651718	9.09342	-6.4946	1.27926e-06	1.64835e-05	4.74607
3303	HSPA1A	6p21.33	0.998131	7.23145	6.49396	1.28117e-06	1.64872e-05	4.91184
56475	RPRM	2q23.3	1.9197	3.21235	6.48466	1.3093e-06	1.68218e-05	5.47822
11346	SYNPO	5q33.1	1.06311	4.97203	6.48426	1.3105e-06	1.68218e-05	5.18355
64651	CSRNP1	3p22.2	0.904861	4.83578	6.47977	1.32432e-06	1.69776e-05	5.22592
79019	CENPM	22q13.2	-1.72693	2.00817	-6.47638	1.33485e-06	1.70908e-05	5.4395
84236	RHBDD1	2q36.3	-0.942433	4.72758	-6.47337	1.3443e-06	1.719e-05	5.16702
23279	NUP160	11p11.2	-0.771015	6.18665	-6.47115	1.35127e-06	1.72573e-05	4.90378
283149	BCL9L	11q23.3	0.64761	8.55893	6.4671	1.36412e-06	1.73994e-05	4.71041
79733	E2F8	11p15.1	-1.45319	2.78475	-6.46396	1.37417e-06	1.75055e-05	5.34368
79075	DSCC1	8q24.12	-2.39261	1.83408	-6.45449	1.40496e-06	1.78752e-05	5.40063
352954	CASTOR3	7q22.1	1.07793	4.95398	6.453	1.40988e-06	1.79152e-05	5.17904
26156	RSL1D1	16p13.13	-0.573995	8.27093	-6.44996	1.41993e-06	1.80203e-05	4.68465
81603	TRIM8	10q24.32	0.789132	6.51178	6.44779	1.42715e-06	1.80892e-05	4.87715
8646	CHRD	3q27.1	2.65197	2.68877	6.44666	1.43094e-06	1.81145e-05	5.31618
10388	SYCP2	20q13.33	0.875994	5.96549	6.44339	1.44192e-06	1.82306e-05	4.93291
10066	SCAMP2	15q24.1	0.64131	6.78254	6.44015	1.4529e-06	1.83433e-05	4.80422
4854	NOTCH3	19p13.12	0.744538	7.28941	6.43961	1.45476e-06	1.83433e-05	4.74346
79710	MORC4	Xq22.3	-0.853914	5.35534	-6.43916	1.45628e-06	1.83433e-05	5.02036
80321	CEP70	3q22.3	-0.958736	4.97284	-6.42342	1.51098e-06	1.90087e-05	4.98883
51806	CALML5	10p15.1	2.17489	2.59174	6.4222	1.51528e-06	1.9039e-05	5.31529
257364	SNX33	15q24.2	0.789187	5.35658	6.41752	1.53201e-06	1.92253e-05	4.95377
123	PLIN2	9p22.1	1.72079	3.536	6.41242	1.55041e-06	1.94297e-05	5.26002
30815	ST6GALNAC6	9q34.11	0.909726	5.37275	6.41195	1.55214e-06	1.94297e-05	4.92777
23625	FAM89B	11q13.1	0.870408	6.06632	6.41123	1.55476e-06	1.94383e-05	4.84843
3149	HMGB3	Xq28	-0.55279	7.60724	-6.40907	1.56265e-06	1.95129e-05	4.6176
80149	ZC3H12A	1p34.3	1.00026	5.36621	6.40799	1.56662e-06	1.95382e-05	4.96695
9564	BCAR1	16q23.1	0.716528	6.19594	6.40588	1.57439e-06	1.96109e-05	4.81047
64748	PLPPR2	19p13.2	0.754571	6.90851	6.39858	1.60159e-06	1.99252e-05	4.69493
79887	PLBD1	12p13.1	0.86423	6.73184	6.38974	1.63514e-06	2.03176e-05	4.67372
6941	TCF19	6p21.33	-1.36778	3.10657	-6.38629	1.64843e-06	2.04575e-05	5.11965
7083	TK1	17q25.3	-1.07599	3.88	-6.37392	1.69701e-06	2.10346e-05	4.91167
129303	TMEM150A	2p11.2	0.986205	4.81386	6.37017	1.71203e-06	2.11947e-05	4.98735
55173	MRPS10	6p21.1	-0.80062	5.79182	-6.36876	1.71771e-06	2.1239e-05	4.75041
79807	GSTCD	4q24	-0.862654	4.37855	-6.36674	1.7259e-06	2.13142e-05	4.9466
6746	SSR2	1q22	-0.548693	8.80823	-6.36188	1.74571e-06	2.15326e-05	4.44637
3673	ITGA2	5q11.2	-0.803341	5.80323	-6.36017	1.75274e-06	2.15929e-05	4.72487
55706	NDC1	1p32.3	-0.862673	5.1542	-6.35803	1.76158e-06	2.16627e-05	4.80646
79143	MBOAT7	19q13.42	0.725213	7.61947	6.35776	1.7627e-06	2.16627e-05	4.53131
90362	FAM110B	8q12.1	1.06207	4.15708	6.35645	1.76815e-06	2.17033e-05	5.03183
8942	KYNU	2q22.2	0.669511	8.13776	6.3525	1.78462e-06	2.18725e-05	4.47876
64855	FAM129B	9q34.11	0.576168	7.76567	6.35201	1.78669e-06	2.18725e-05	4.48864
23152	CIC	19q13.2	0.838074	6.19188	6.3516	1.78842e-06	2.18725e-05	4.67554
57082	KNL1	15q15.1	-1.81278	2.04275	-6.35108	1.7906e-06	2.18726e-05	5.14312
54852	PAQR5	15q23	2.08746	2.72575	6.35047	1.79317e-06	2.18775e-05	5.18484
10131	TRAP1	16p13.3	-0.609143	7.37537	-6.34729	1.80664e-06	2.20153e-05	4.49603
79960	JADE1	4q28.2	-1.1653	3.71438	-6.34389	1.82115e-06	2.21654e-05	5.03077
8501	SLC43A1	11q12.1	-1.63954	3.44634	-6.34004	1.83772e-06	2.23401e-05	5.00788
51726	DNAJB11	3q27.3	-0.746909	6.78729	-6.33637	1.85366e-06	2.25068e-05	4.53767
26094	DCAF4	14q24.2	0.81622	5.61539	6.33577	1.85629e-06	2.25117e-05	4.72465
3304	HSPA1B	6p21.33	0.92969	6.02986	6.33497	1.85975e-06	2.25266e-05	4.69406
23550	PSD4	2q14.1	0.730688	6.39754	6.33188	1.87334e-06	2.2664e-05	4.59209
1501	CTNND2	5p15.2	0.680262	6.74488	6.32845	1.88852e-06	2.28204e-05	4.53026
3229	HOXC13	12q13.13	1.00783	4.5992	6.32708	1.89462e-06	2.28473e-05	4.93321
11099	PTPN21	14q31.3	1.19516	4.69328	6.32694	1.89527e-06	2.28473e-05	4.94181
8991	SELENBP1	1q21.3	0.587304	8.08159	6.3258	1.90035e-06	2.28731e-05	4.39876
23328	SASH1	6q24.3-q25.1	0.935951	5.96581	6.32498	1.90404e-06	2.28731e-05	4.66518
65018	PINK1	1p36.12	1.24294	4.31691	6.32494	1.90421e-06	2.28731e-05	4.97884
9771	RAPGEF5	7p15.3	-1.17403	3.29563	-6.32326	1.91175e-06	2.29364e-05	5.04875
100288637	LOC100288637	15q13.2	-1.82897	1.8148	-6.32046	1.92439e-06	2.30454e-05	5.1153
55250	ELP2	18q12.2	-0.818614	7.27775	-6.32024	1.92539e-06	2.30454e-05	4.45945
28977	MRPL42	12q22	-0.855626	5.49197	-6.31755	1.93764e-06	2.31646e-05	4.66901
23396	PIP5K1C	19p13.3	0.827285	5.50288	6.31446	1.95181e-06	2.33064e-05	4.70585
55332	DRAM1	12q23.2	0.899437	7.28463	6.3093	1.97566e-06	2.35633e-05	4.44238
9657	IQCB1	3q13.33	-0.917182	4.87478	-6.30768	1.98324e-06	2.36258e-05	4.76015
138151	NACC2	9q34.3	0.881684	5.78075	6.30103	2.01456e-06	2.39707e-05	4.6588
55153	SDAD1	4q21.1	-0.711808	5.70254	-6.29604	2.0384e-06	2.42257e-05	4.60065
6697	SPR	2p13.2	0.766168	6.21498	6.28109	2.11154e-06	2.50656e-05	4.54241
3070	HELLS	10q23.33	-1.5281	2.99177	-6.2774	2.13001e-06	2.52552e-05	4.98349
56181	MTFR1L	1p36.11	0.805698	5.63262	6.27615	2.1363e-06	2.53001e-05	4.58956
85441	HELZ2	20q13.33	0.962992	5.84948	6.27315	2.15149e-06	2.54501e-05	4.54647
8932	MBD2	18q21.2	0.703866	6.91888	6.27241	2.15529e-06	2.54652e-05	4.40447
55144	LRRC8D	1p22.2	-0.916322	5.09989	-6.26941	2.17058e-06	2.56158e-05	4.61093
57198	ATP8B2	1q21.3	1.08643	6.49693	6.26889	2.17325e-06	2.56175e-05	4.45771
9886	RHOBTB1	10q21.2	-1.08976	4.46474	-6.26801	2.17779e-06	2.56411e-05	4.74762
84364	ARFGAP2	11p11.2	0.563407	7.1012	6.26661	2.18499e-06	2.56959e-05	4.34751
1869	E2F1	20q11.22	-1.42621	3.42705	-6.26501	2.19327e-06	2.57633e-05	4.80805
57650	CIP2A	3q13.13	-1.35492	3.60829	-6.26404	2.19826e-06	2.57919e-05	4.86055
286343	LURAP1L	9p23	-1.22499	4.4062	-6.2594	2.22253e-06	2.60464e-05	4.82117
2975	GTF3C1	16p12.1	0.549055	7.9507	6.25801	2.22984e-06	2.61017e-05	4.24597
92714	ARRDC1	9q34.3	0.7527	6.60336	6.25741	2.23297e-06	2.61081e-05	4.40141
3491	CYR61	1p22.3	1.47733	5.19178	6.25421	2.24992e-06	2.6276e-05	4.71906
79157	MFSD11	17q25.1-q25.2	0.888647	4.68349	6.24997	2.2726e-06	2.65101e-05	4.68991
29995	LMCD1	3p25.3	0.87168	5.48702	6.24762	2.28522e-06	2.66267e-05	4.59594
5111	PCNA	20p12.3	-0.8422	5.7205	-6.23767	2.33966e-06	2.72295e-05	4.46444
27131	SNX5	20p11.23	-0.573859	7.23021	-6.22598	2.40521e-06	2.79602e-05	4.21223
27316	RBMX	Xq26.3	-0.531395	8.3092	-6.21758	2.45352e-06	2.84891e-05	4.12035
10616	RBCK1	20p13	-0.717732	6.17413	-6.20988	2.49867e-06	2.89799e-05	4.28764
25886	POC1A	3p21.2	-1.6054	2.42616	-6.20929	2.50214e-06	2.89869e-05	4.84515
8996	NOL3	16q22.1	0.809518	5.6735	6.20528	2.52601e-06	2.923e-05	4.42598
84649	DGAT2	11q13.5	-1.86506	2.26516	-6.19876	2.56536e-06	2.96439e-05	4.84389
9738	CCP110	16p12.3	-0.964146	5.09889	-6.19838	2.56765e-06	2.96439e-05	4.42718
112399	EGLN3	14q13.1	2.58557	3.38255	6.19313	2.5998e-06	2.99578e-05	4.82904
9922	IQSEC1	3p25.2-p25.1	0.581938	6.94401	6.19297	2.60077e-06	2.99578e-05	4.18355
6004	RGS16	1q25.3	-1.24581	4.0804	-6.19013	2.61834e-06	3.01258e-05	4.67657
6596	HLTF	3q24	-0.564335	7.22645	-6.18226	2.66764e-06	3.06582e-05	4.09903
2771	GNAI2	3p21.31	0.559666	7.15998	6.1747	2.71589e-06	3.11772e-05	4.12861
6627	SNRPA1	15q26.3	-0.700628	6.4762	-6.17404	2.72015e-06	3.11906e-05	4.18035
64787	EPS8L2	11p15.5	0.789447	6.67449	6.16084	2.8067e-06	3.21466e-05	4.18952
9933	PUM3	9p24.2	-1.09604	4.29736	-6.15679	2.83381e-06	3.23874e-05	4.51952
83732	RIOK1	6p24.3	-1.09912	3.7881	-6.15674	2.83414e-06	3.23874e-05	4.59375
1580	CYP4B1	1p33	1.48388	4.0705	6.15162	2.86884e-06	3.27469e-05	4.61341
64225	ATL2	2p22.2-p22.1	-0.664248	6.17178	-6.14898	2.88685e-06	3.28808e-05	4.15432
9891	NUAK1	12q23.3	1.22249	5.16598	6.14874	2.8885e-06	3.28808e-05	4.3927
26354	GNL3	3p21.1	-0.585981	6.66752	-6.14847	2.89034e-06	3.28808e-05	4.10246
51097	SCCPDH	1q44	0.854896	5.43769	6.14466	2.9166e-06	3.31178e-05	4.36964
132320	SCLT1	4q28.2	-1.74498	2.16548	-6.1445	2.91772e-06	3.31178e-05	4.71989
11034	DSTN	20p12.1	0.574612	9.48349	6.14129	2.94009e-06	3.33275e-05	3.8993
10614	HEXIM1	17q21.31	0.680769	6.14862	6.14061	2.94485e-06	3.33275e-05	4.18437
6124	RPL4	15q22.31	-0.445955	10.8041	-6.14043	2.94609e-06	3.33275e-05	3.82883
8602	NOP14	4p16.3	-0.68334	6.00955	-6.13903	2.95593e-06	3.33724e-05	4.18696
80336	PABPC1L	20q13.12	-0.880868	6.19427	-6.13892	2.95667e-06	3.33724e-05	4.13219
387914	SHISA2	13q12.13	1.01372	4.73428	6.13313	2.99764e-06	3.3797e-05	4.42075
65265	C8orf33	8q24.3	-0.569923	6.61476	-6.13002	3.01991e-06	3.40102e-05	4.05364
8912	CACNA1H	16p13.3	0.711115	7.01056	6.12825	3.03259e-06	3.4115e-05	4.03127
43	ACHE	7q22.1	4.41958	2.75701	6.12212	3.07712e-06	3.45774e-05	4.38928
116151	FAM210B	20q13.2	0.663052	7.86081	6.11273	3.14664e-06	3.53193e-05	3.9272
9066	SYT7	11q12.2	0.580233	7.32063	6.11192	3.15268e-06	3.53478e-05	3.95733
821	CANX	5q35.3	-0.49089	10.7756	-6.10935	3.17202e-06	3.54947e-05	3.75406
10585	POMT1	9q34.13	0.696399	5.8327	6.10925	3.17281e-06	3.54947e-05	4.1435
23516	SLC39A14	8p21.3	-0.71664	5.72171	-6.10497	3.20528e-06	3.58091e-05	4.12467
5833	PCYT2	17q25.3	0.803864	5.45869	6.10461	3.208e-06	3.58091e-05	4.22668
64793	CEP85	1p36.11	-1.03355	4.26789	-6.1008	3.23725e-06	3.60957e-05	4.35202
79042	TSEN34	19q13.42	0.610709	6.78033	6.09683	3.26796e-06	3.63979e-05	3.98111
51575	ESF1	20p12.1	-0.765365	5.71663	-6.09245	3.30218e-06	3.67386e-05	4.10753
7869	SEMA3B	3p21.31	-0.90563	5.6579	-6.08994	3.32199e-06	3.69183e-05	4.17002
5763	PTMS	12p13.31	0.696086	7.89548	6.08872	3.33168e-06	3.69853e-05	3.83984
116113	FOXP4	6p21.1	0.653565	7.32923	6.08547	3.35753e-06	3.72313e-05	3.88478
91748	ELMSAN1	14q24.3	0.698876	6.56809	6.08455	3.36492e-06	3.72688e-05	3.97002
8910	SGCE	7q21.3	-1.42899	3.33595	-6.08413	3.36829e-06	3.72688e-05	4.49048
9581	PREPL	2p21	-0.730534	6.39886	-6.08346	3.37364e-06	3.72872e-05	3.97051
80325	ABTB1	3q21.3	0.890863	4.5691	6.07834	3.41511e-06	3.77043e-05	4.28536
122416	ANKRD9	14q32.31	1.22316	3.97147	6.07686	3.42711e-06	3.77955e-05	4.44016
7903	ST8SIA4	5q21.1	1.22229	4.51715	6.06995	3.48407e-06	3.83817e-05	4.33637
112597	CYTOR	2p11.2	1.06116	4.218	6.06782	3.50174e-06	3.85309e-05	4.3671
79789	CLMN	14q32.13	0.722259	5.97258	6.06741	3.50523e-06	3.85309e-05	4.02189
94103	ORMDL3	17q21.1	0.677152	6.36366	6.06063	3.56235e-06	3.91161e-05	3.96595
112770	GLMP	1q22	0.806976	5.37721	6.05631	3.5992e-06	3.94566e-05	4.13787
11164	NUDT5	10p14	-0.607243	6.39738	-6.0558	3.6036e-06	3.94566e-05	3.91235
5934	RBL2	16q12.2	0.602341	7.9835	6.05563	3.60508e-06	3.94566e-05	3.76245
6623	SNCG	10q23.2	1.61979	3.47275	6.05091	3.64583e-06	3.98595e-05	4.479
9221	NOLC1	10q24.32	-0.611604	7.25993	-6.04691	3.68086e-06	4.0199e-05	3.79798
54836	BSPRY	9q32	-0.698565	5.55919	-6.04475	3.69986e-06	4.03389e-05	4.00545
10591	DNPH1	6p21.1	-0.719216	5.36689	-6.04455	3.70166e-06	4.03389e-05	4.02619
23223	RRP12	10q24.1	-0.735345	5.39808	-6.03937	3.74765e-06	4.07961e-05	4.0475
51599	LSR	19q13.12	0.56017	7.66667	6.0383	3.7572e-06	4.08454e-05	3.74521
55110	MAGOHB	12p13.2	-1.16475	3.78354	-6.03796	3.76027e-06	4.08454e-05	4.333
55631	LRRC40	1p31.1	-1.04517	3.64515	-6.03203	3.81388e-06	4.13833e-05	4.31908
996	CDC27	17q21.32	-0.641141	6.09346	-6.03022	3.83041e-06	4.15181e-05	3.88202
3801	KIFC3	16q21	1.82406	3.87843	6.02865	3.84481e-06	4.16294e-05	4.37476
10592	SMC2	9q31.1	-1.1497	4.44038	-6.02695	3.86047e-06	4.17542e-05	4.10547
10728	PTGES3	12q13.3	-0.555979	8.46729	-6.02234	3.90322e-06	4.21715e-05	3.64432
114789	SLC25A25	9q34.11	-1.05163	4.57111	-6.01866	3.93762e-06	4.24977e-05	4.16314
56950	SMYD2	1q32.3	0.832145	5.29162	6.01254	3.99562e-06	4.30776e-05	4.03755
4494	MT1F	16q13	1.12314	3.9762	6.01065	4.0137e-06	4.32264e-05	4.19967
901	CCNG2	4q21.1	0.655213	7.10905	6.00929	4.0268e-06	4.33213e-05	3.71746
58505	OSTC	4q25	-0.712469	6.60025	-6.00508	4.0675e-06	4.37126e-05	3.76065
4898	NRDC	1p32.3	-0.521975	7.91648	-6.00017	4.11561e-06	4.41827e-05	3.62173
87178	PNPT1	2p16.1	-0.782472	5.40978	-5.99481	4.1687e-06	4.47051e-05	3.9413
84524	ZC3H8	2q14.1	-1.02743	4.11527	-5.98983	4.21858e-06	4.51921e-05	4.14847
966	CD59	11p13	0.679228	8.07466	5.98645	4.25286e-06	4.5511e-05	3.6105
84172	POLR1B	2q14.1	-0.752482	5.36757	-5.9828	4.2902e-06	4.5862e-05	3.91489
286262	TPRN	9q34.3	0.874264	4.74849	5.9793	4.32624e-06	4.61984e-05	4.04959
3300	DNAJB2	2q35	0.715678	6.32747	5.97723	4.34771e-06	4.63787e-05	3.77538
54532	USP53	4q26	0.740438	5.56289	5.96955	4.42839e-06	4.71594e-05	3.86307
1453	CSNK1D	17q25.3	0.524266	7.97035	5.96938	4.43024e-06	4.71594e-05	3.55231
10916	MAGED2	Xp11.21	0.525746	9.08274	5.9683	4.44173e-06	4.72319e-05	3.50053
51434	ANAPC7	12q24.11	-0.858792	5.82491	-5.96513	4.47547e-06	4.75407e-05	3.79526
201799	TMEM154	4q31.3	-1.41953	3.27458	-5.96344	4.49362e-06	4.76833e-05	4.24807
23649	POLA2	11q13.1	-0.935716	4.6806	-5.96086	4.52153e-06	4.79292e-05	3.95958
51118	UTP11	1p34.3	-0.733925	5.39824	-5.9577	4.5559e-06	4.82289e-05	3.83592
80700	UBXN6	19p13.3	0.627774	6.4317	5.95738	4.55936e-06	4.82289e-05	3.67979
619279	ZNF704	8q21.13	0.681393	6.47328	5.95224	4.61591e-06	4.87761e-05	3.62568
64747	MFSD1	3q25.32	0.673033	6.03645	5.95154	4.6236e-06	4.88063e-05	3.7712
84958	SYTL1	1p36.11	-0.733792	6.42866	-5.94956	4.64563e-06	4.89877e-05	3.66139
57621	ZBTB2	6q25.1	-0.714648	6.07751	-5.94762	4.66731e-06	4.91649e-05	3.69567
115	ADCY9	16p13.3	-0.577751	6.48706	-5.93009	4.86763e-06	5.12216e-05	3.59484
5119	CHMP1A	16q24.3	0.557854	7.45717	5.92318	4.94897e-06	5.20234e-05	3.48332
81855	SFXN3	10q24.31	-1.21769	3.60064	-5.92209	4.96191e-06	5.21052e-05	4.07828
9939	RBM8A	1q21.1	-0.521411	7.97341	-5.92102	4.97466e-06	5.21848e-05	3.42476
79735	TBC1D17	19q13.33	0.725549	5.33403	5.91927	4.99554e-06	5.23496e-05	3.77565
1808	DPYSL2	8p21.2	-1.08623	3.67591	-5.91566	5.03902e-06	5.27504e-05	4.03119
11313	LYPLA2	1p36.11	0.801872	5.76417	5.91233	5.07952e-06	5.31193e-05	3.70679
54492	NEURL1B	5q35.1	-0.981527	4.71365	-5.90955	5.11345e-06	5.34189e-05	3.82277
55715	DOK4	16q21	1.03937	4.40243	5.9044	5.1771e-06	5.4028e-05	3.92215
1209	CLPTM1	19q13.32	0.54074	7.20718	5.90212	5.20551e-06	5.42683e-05	3.4569
823	CAPN1	11q13.1	0.513609	8.06131	5.89455	5.30103e-06	5.52072e-05	3.37433
1512	CTSH	15q25.1	0.626073	7.25479	5.88884	5.37421e-06	5.59117e-05	3.42162
140576	S100A16	1q21.3	0.599308	8.56278	5.88664	5.40276e-06	5.6151e-05	3.32549
23564	DDAH2	6p21.33	0.611726	6.50826	5.88566	5.41553e-06	5.62258e-05	3.49949
222584	FAM83B	6p12.1	0.67113	7.13857	5.88474	5.42741e-06	5.62912e-05	3.40902
26959	HBP1	7q22.3	0.659945	6.13088	5.88363	5.44194e-06	5.63841e-05	3.5605
10440	TIMM17A	1q32.1	-0.748243	5.81926	-5.88095	5.47718e-06	5.66911e-05	3.59261
7351	UCP2	11q13.4	0.663045	6.99227	5.87477	5.55915e-06	5.74806e-05	3.47615
25959	KANK2	19p13.2	0.676435	6.21315	5.87331	5.5787e-06	5.76238e-05	3.51626
2260	FGFR1	8p11.23	0.801386	5.61702	5.87024	5.62005e-06	5.79916e-05	3.59198
83857	TMTC1	12p11.22	-0.759876	5.75006	-5.86714	5.662e-06	5.83649e-05	3.52812
79415	CYBC1	17q25.3	0.662456	5.64758	5.86628	5.67372e-06	5.8426e-05	3.58985
2081	ERN1	17q23.3	-1.16815	3.53469	-5.86407	5.70396e-06	5.86776e-05	3.96309
5816	PVALB	22q12.3	2.38662	2.4348	5.86273	5.72239e-06	5.88073e-05	4.02766
8706	B3GALNT1	3q26.1	-0.75344	6.39965	-5.86208	5.73135e-06	5.88396e-05	3.44939
54847	SIDT1	3q13.2	0.551345	7.70011	5.85905	5.77335e-06	5.92105e-05	3.3083
25771	TBC1D22A	22q13.31	0.711003	5.4694	5.85753	5.79445e-06	5.93667e-05	3.6009
284352	PPP1R37	19q13.32	0.629391	6.52909	5.8567	5.80603e-06	5.94251e-05	3.42215
5888	RAD51	15q15.1	-1.53088	2.33248	-5.85293	5.85893e-06	5.99058e-05	4.01062
23363	OBSL1	2q35	0.698524	7.45931	5.8501	5.89902e-06	6.02547e-05	3.31426
55254	TMEM39A	3q13.33	-0.82564	5.53149	-5.84932	5.90999e-06	6.02897e-05	3.53303
221150	SKA3	13q12.11	-1.5355	2.20983	-5.84825	5.92533e-06	6.02897e-05	3.92288
8645	KCNK5	6p21.2	-2.89484	1.36573	-5.84798	5.9292e-06	6.02897e-05	3.91581
220042	DDIAS	11q14.1	-2.14094	1.88292	-5.84782	5.93136e-06	6.02897e-05	4.03197
83879	CDCA7	2q31.1	-1.77399	2.82724	-5.84734	5.93825e-06	6.02897e-05	3.93399
254102	EHBP1L1	11q13.1	0.678675	5.79326	5.84734	5.93826e-06	6.02897e-05	3.52702
51196	PLCE1	10q23.33	1.85967	2.24214	5.84645	5.95107e-06	6.03592e-05	4.04432
4234	METTL1	12q14.1	-1.10687	4.09298	-5.84553	5.96417e-06	6.04313e-05	3.85991
83667	SESN2	1p35.3	-0.786446	6.05511	-5.84032	6.03944e-06	6.11327e-05	3.47733
130574	LYPD6	2q23.2	-1.2007	4.28745	-5.8393	6.0544e-06	6.12228e-05	3.79067
57214	CEMIP	15q25.1	1.69515	3.82916	5.83566	6.10758e-06	6.16988e-05	3.96184
57669	EPB41L5	2q14.2	0.520401	7.83087	5.83411	6.13054e-06	6.18688e-05	3.23181
1845	DUSP3	17q21.31	0.780235	5.71046	5.83358	6.13835e-06	6.18859e-05	3.55942
4715	NDUFB9	8q24.13	-0.538371	7.78318	-5.83224	6.15818e-06	6.20239e-05	3.21915
57530	CGN	1q21.3	0.484163	7.62584	5.82607	6.25035e-06	6.28503e-05	3.22044
10635	RAD51AP1	12p13.32	-1.8842	1.4557	-5.82556	6.25808e-06	6.28503e-05	3.99189
6723	SRM	1p36.22	-0.880269	5.50873	-5.8255	6.2589e-06	6.28503e-05	3.49255
675	BRCA2	13q13.1	-1.51415	2.2589	-5.82448	6.27435e-06	6.29429e-05	3.9687
9054	NFS1	20q11.22	0.70772	5.63781	5.81948	6.35033e-06	6.36419e-05	3.48541
317648	NOP14-AS1	4p16.3	1.08473	4.31739	5.81841	6.36678e-06	6.37436e-05	3.80328
471	ATIC	2q35	-0.463177	8.06507	-5.8146	6.42545e-06	6.42672e-05	3.16144
7267	TTC3	21q22.13	0.510013	9.44316	5.81306	6.44947e-06	6.43801e-05	3.09738
9181	ARHGEF2	1q22	-1.01043	4.4421	-5.81306	6.44948e-06	6.43801e-05	3.6274
55132	LARP1B	4q28.2	-0.692589	5.237	-5.81206	6.4649e-06	6.44703e-05	3.49524
55667	DENND4C	9p22.1	0.69857	6.00826	5.80942	6.50632e-06	6.48193e-05	3.3734
8850	KAT2B	3p24.3	0.83681	5.40078	5.80566	6.56552e-06	6.53447e-05	3.47295
7837	PXDN	2p25.3	0.462628	8.57038	5.80084	6.64223e-06	6.60431e-05	3.11835
55632	G2E3	14q12	-0.988714	4.04212	-5.79058	6.80869e-06	6.76316e-05	3.66548
8000	PSCA	8q24.3	3.4725	2.45389	5.78931	6.82951e-06	6.77718e-05	3.83364
23310	NCAPD3	11q25	-1.06205	4.96098	-5.78517	6.89805e-06	6.83848e-05	3.47095
203328	SUSD3	9q22.31	-2.14428	2.20603	-5.77956	6.99222e-06	6.92504e-05	3.87988
254427	PROSER2	10p14	-0.907375	4.34391	-5.77668	7.04087e-06	6.96639e-05	3.56853
6009	RHEB	7q36.1	-0.629831	6.31257	-5.77354	7.09458e-06	7.01267e-05	3.23754
11222	MRPL3	3q22.1	-0.529283	7.17633	-5.77215	7.11829e-06	7.02922e-05	3.13283
64067	NPAS3	14q13.1	1.84187	3.07255	5.76891	7.17424e-06	7.07507e-05	3.86064
25946	ZNF385A	12q13.13	0.974523	5.04651	5.76865	7.17873e-06	7.07507e-05	3.49294
6455	SH3GL1	19p13.3	0.742772	6.14894	5.76665	7.21356e-06	7.10248e-05	3.26776
9479	MAPK8IP1	11p11.2	1.92405	2.79017	5.76484	7.24511e-06	7.1266e-05	3.85845
23560	GTPBP4	10p15.3	-0.630121	7.32929	-5.76133	7.3069e-06	7.18038e-05	3.10399
84128	WDR75	2q32.2	-0.700225	5.23007	-5.75976	7.33467e-06	7.20066e-05	3.37614
1154	CISH	3p21.2	-0.974827	4.37377	-5.75867	7.35387e-06	7.21251e-05	3.57692
100499177	THAP9-AS1	4q21.22	-0.887058	4.74552	-5.75773	7.3707e-06	7.222e-05	3.47279
4678	NASP	1p34.1	-0.736572	6.38502	-5.75492	7.42079e-06	7.26017e-05	3.15802
728833	FAM72D	1q21.1	-2.27462	0.666969	-5.75436	7.43082e-06	7.26017e-05	3.82066
5538	PPT1	1p34.2	0.552058	8.53576	5.75434	7.43122e-06	7.26017e-05	2.99372
51092	SIDT2	11q23.3	0.649102	6.3537	5.75016	7.5066e-06	7.32673e-05	3.19764
55766	H2AFJ	12p12.3	-0.527129	7.28515	-5.74904	7.52704e-06	7.33959e-05	3.05716
55345	ZGRF1	4q25	-1.69651	2.33697	-5.74623	7.57831e-06	7.38246e-05	3.78181
7436	VLDLR	9p24.2	-0.850895	4.80139	-5.74426	7.61456e-06	7.40947e-05	3.40315
7411	VBP1	Xq28	-0.56605	6.31516	-5.74392	7.62071e-06	7.40947e-05	3.16224
51154	MRTO4	1p36.13	-0.709793	6.04136	-5.73895	7.71281e-06	7.48752e-05	3.2169
55809	TRERF1	6p21.1	0.807446	6.43511	5.73874	7.71684e-06	7.48752e-05	3.13636
2013	EMP2	16p13.13	-0.483475	9.0435	-5.73839	7.72322e-06	7.48752e-05	2.92772
30001	ERO1A	14q22.1	-0.757141	5.87698	-5.7354	7.77945e-06	7.5348e-05	3.21828
58476	TP53INP2	20q11.22	1.88792	3.78117	5.72347	8.00709e-06	7.74786e-05	3.71492
23659	PLA2G15	16q22.1	0.707697	5.33255	5.72188	8.03795e-06	7.76585e-05	3.31486
79007	DBNDD1	16q24.3	0.69188	7.53296	5.72172	8.04106e-06	7.76585e-05	2.99413
1662	DDX10	11q22.3	-1.01926	4.32969	-5.7213	8.04921e-06	7.7663e-05	3.52826
1613	DAPK3	19p13.3	0.739055	5.367	5.72038	8.06724e-06	7.77627e-05	3.31639
84928	TMEM209	7q32.2	-0.911397	4.55312	-5.71879	8.09822e-06	7.79869e-05	3.3913
97	ACYP1	14q24.3	-1.375	2.98486	-5.71832	8.10754e-06	7.80022e-05	3.69691
340267	COL28A1	7p21.3	2.69502	1.87439	5.71412	8.19027e-06	7.87232e-05	3.66001
25970	SH2B1	16p11.2	0.612679	6.2467	5.71197	8.23306e-06	7.90593e-05	3.11779
6745	SSR1	6p24.3	-0.543176	7.68375	-5.70646	8.34364e-06	8.0045e-05	2.93308
10714	POLD3	11q13.4	-0.842732	4.46356	-5.70506	8.37186e-06	8.02229e-05	3.37197
9789	SPCS2	11q13.4	-0.525772	6.61746	-5.70476	8.37806e-06	8.02229e-05	3.01749
54680	ZNHIT6	1p22.3	-1.0912	3.6923	-5.69913	8.49304e-06	8.12469e-05	3.5472
51337	THEM6	8q24.3	0.707523	6.55454	5.6981	8.51419e-06	8.13721e-05	3.04825
2079	ERH	14q24.1	-0.702801	6.59932	-5.69748	8.52687e-06	8.14163e-05	3.01681
283638	CEP170B	14q32.33	0.783614	6.11956	5.69613	8.5549e-06	8.16068e-05	3.12481
200186	CRTC2	1q21.3	0.625728	5.96444	5.69128	8.65602e-06	8.2471e-05	3.11539
79723	SUV39H2	10p13	-1.0132	4.08478	-5.691	8.66183e-06	8.2471e-05	3.41995
146956	EME1	17q21.33	-1.99183	1.3767	-5.68918	8.70004e-06	8.27568e-05	3.68458
55779	CFAP44	3q13.2	1.02836	4.9332	5.68854	8.7136e-06	8.28079e-05	3.38193
9643	MORF4L2	Xq22.2	-0.458632	9.02365	-5.68017	8.89206e-06	8.43548e-05	2.79356
7042	TGFB2	1q41	1.77077	3.06294	5.68012	8.89308e-06	8.43548e-05	3.65563
131583	FAM43A	3q29	1.20295	3.7026	5.67684	8.96415e-06	8.49492e-05	3.52695
8507	ENC1	5q13.3	0.712691	5.34166	5.67559	8.99131e-06	8.51267e-05	3.19086
598	BCL2L1	20q11.21	0.629574	7.15682	5.67476	9.00948e-06	8.52189e-05	2.92626
23193	GANAB	11q12.3	-0.464958	9.74057	-5.6703	9.10734e-06	8.6064e-05	2.72499
57568	SIPA1L2	1q42.2	-0.920434	4.8075	-5.66633	9.19538e-06	8.68147e-05	3.20221
10856	RUVBL2	19q13.33	-0.582145	6.60269	-5.66519	9.22084e-06	8.69738e-05	2.9315
344595	DUBR	3q13.12	1.76039	3.42165	5.66365	9.25548e-06	8.71618e-05	3.62122
9156	EXO1	1q43	-1.8711	1.65049	-5.66353	9.25803e-06	8.71618e-05	3.62661
105370098	NA	NA	-1.25166	3.36365	-5.66164	9.30067e-06	8.74817e-05	3.45977
1075	CTSC	11q14.2	-1.79078	2.71956	-5.66046	9.32737e-06	8.75934e-05	3.59683
3927	LASP1	17q12	0.472726	8.18272	5.66034	9.32989e-06	8.75934e-05	2.79234
3730	ANOS1	Xp22.31	0.836229	4.59813	5.65601	9.42838e-06	8.84359e-05	3.27055
490	ATP2B1	12q21.33	0.565456	8.02666	5.65056	9.55402e-06	8.95313e-05	2.77699
10567	RABAC1	19q13.2	0.833458	4.94229	5.64385	9.71072e-06	9.07886e-05	3.20359
50604	IL20	1q32.1	-2.39788	1.61806	-5.64367	9.71493e-06	9.07886e-05	3.51663
11054	OGFR	20q13.33	0.606243	6.41607	5.64366	9.71515e-06	9.07886e-05	2.92806
4982	TNFRSF11B	8q24.12	1.77378	3.04504	5.64079	9.78327e-06	9.13406e-05	3.57528
83439	TCF7L1	2p11.2	2.26429	2.1709	5.63941	9.81603e-06	9.15619e-05	3.56243
7703	PCGF2	17q12	0.765481	5.16353	5.63747	9.8623e-06	9.19086e-05	3.12529
79001	VKORC1	16p11.2	-0.748889	5.60863	-5.63656	9.88416e-06	9.20275e-05	2.99777
57178	ZMIZ1	10q22.3	0.545877	7.6979	5.63558	9.90775e-06	9.21622e-05	2.7596
51293	CD320	19p13.2	-0.983063	3.99485	-5.63133	1.00104e-05	9.30313e-05	3.29946
84460	ZMAT1	Xq22.1	1.05704	4.96344	5.62603	1.01401e-05	9.41498e-05	3.2059
7107	GPR137B	1q42.3	0.873534	5.71883	5.61866	1.03233e-05	9.5763e-05	2.9854
7379	UPK2	11q23.3	1.10684	4.29975	5.61489	1.04181e-05	9.65538e-05	3.30361
91687	CENPL	1q25.1	-1.26772	2.64557	-5.61417	1.04363e-05	9.66335e-05	3.43102
83707	TRPT1	11q13.1	0.783713	5.73347	5.61307	1.04642e-05	9.67289e-05	2.98601
25962	VIRMA	8q22.1	0.516534	7.43299	5.61301	1.04657e-05	9.67289e-05	2.71866
10327	AKR1A1	1p34.1	-0.587574	6.52302	-5.60931	1.05603e-05	9.75134e-05	2.8216
375248	ANKRD36	2q11.2	-1.43493	3.33466	-5.60088	1.0779e-05	9.9442e-05	3.36321
6256	RXRA	9q34.2	0.563293	7.70531	5.59937	1.08185e-05	9.9716e-05	2.66079
5074	PAWR	12q21.2	0.65411	7.64657	5.59838	1.08446e-05	9.98649e-05	2.67931
57506	MAVS	20p13	0.476324	7.96566	5.59673	1.08882e-05	0.000100175	2.64531
200058	FLJ23867	1q25.2	0.845817	7.61488	5.59568	1.09159e-05	0.000100339	2.67599
10469	TIMM44	19p13.2	-0.797578	4.89122	-5.59346	1.09751e-05	0.000100791	2.995
55159	RFWD3	16q23.1	-0.632576	6.35034	-5.59157	1.10255e-05	0.000101162	2.78983
124220	ZG16B	16p13.3	0.715461	6.06827	5.58809	1.11192e-05	0.000101929	2.85833
4929	NR4A2	2q24.1	0.774714	5.29529	5.58486	1.1207e-05	0.000102577	2.99233
201725	C4orf46	4q32.1	-1.18402	3.41584	-5.58475	1.12101e-05	0.000102577	3.32272
91408	BTF3L4	1p32.3	-0.5683	6.38444	-5.5841	1.12277e-05	0.000102645	2.76346
11094	CACFD1	9q34.2	0.837081	5.23312	5.58121	1.13069e-05	0.000103275	2.98516
6550	SLC9A3	5p15.33	1.28926	4.02321	5.57964	1.13501e-05	0.000103576	3.25553
54663	WDR74	11q12.3	-0.753078	5.31363	-5.57908	1.13657e-05	0.000103625	2.9175
114625	ERMAP	1p34.2	0.885938	4.46484	5.57788	1.1399e-05	0.000103834	3.11942
10743	RAI1	17p11.2	0.640798	6.23173	5.57284	1.15395e-05	0.00010502	2.7704
7074	TIAM1	21q22.11	-0.836837	5.61921	-5.57021	1.16137e-05	0.0001056	2.88814
80331	DNAJC5	20q13.33	0.493707	7.72562	5.56957	1.16317e-05	0.000105669	2.60119
928	CD9	12p13.31	0.463629	8.8071	5.56844	1.16636e-05	0.000105863	2.52718
3614	IMPDH1	7q32.1	0.600517	6.69179	5.56784	1.16806e-05	0.000105923	2.67602
54620	FBXL19	16p11.2	0.633562	5.37504	5.56578	1.17395e-05	0.000106361	2.91121
84916	UTP4	16q22.1	-0.606574	5.95218	-5.56312	1.18157e-05	0.000106956	2.79026
6628	SNRPB	20p13	-0.512642	7.01647	-5.5586	1.19464e-05	0.000108041	2.60873
25777	SUN2	22q13.1	-0.755342	5.79005	-5.55678	1.19996e-05	0.000108425	2.73417
26470	SEZ6L2	16p11.2	0.515719	8.1363	5.55606	1.20206e-05	0.000108519	2.54161
10054	UBA2	19q13.11	-0.510088	7.18167	-5.5518	1.2146e-05	0.000109552	2.58138
27235	COQ2	4q21.22-q21.23	-0.884576	3.86604	-5.54656	1.23017e-05	0.000110858	3.10786
58190	CTDSP1	2q35	0.515612	6.81198	5.54499	1.23489e-05	0.000111184	2.607
27124	INPP5J	22q12.2	0.898283	5.08521	5.54371	1.23874e-05	0.000111432	2.83873
266655	BRD3OS	9q34.2	0.788268	5.20979	5.54253	1.24233e-05	0.000111655	2.90711
55727	BTBD7	14q32.12	0.697046	5.98346	5.53618	1.26168e-05	0.000113293	2.73444
2222	FDFT1	8p23.1	-0.47502	7.15611	-5.5354	1.26409e-05	0.000113408	2.55021
441376	AARD	8q24.11	-1.94774	4.61553	-5.52787	1.28748e-05	0.000115405	2.90251
132660	LIN54	4q21.22	-0.929494	4.38674	-5.52629	1.29246e-05	0.000115749	2.93881
6875	TAF4B	18q11.2	-1.27357	3.14075	-5.5252	1.2959e-05	0.000115954	3.20422
51232	CRIM1	2p22.2	0.68064	6.40362	5.52458	1.29784e-05	0.000116025	2.65148
23053	ZSWIM8	10q22.2	0.692523	5.90873	5.5218	1.30667e-05	0.000116674	2.72513
9786	KIAA0586	14q23.1	-0.908535	4.01314	-5.52157	1.30741e-05	0.000116674	2.98199
55536	CDCA7L	7p15.3	-1.41533	2.96935	-5.51912	1.31524e-05	0.000117269	3.19542
9868	TOMM70	3q12.2	-0.510343	7.24537	-5.51795	1.319e-05	0.0001175	2.49537
56135	PCDHAC1	5q31.3	2.88801	2.09792	5.51486	1.32898e-05	0.000118285	3.1708
334	APLP2	11q24.3	0.388894	10.4792	5.50702	1.35463e-05	0.000120462	2.30336
23524	SRRM2	16p13.3	0.533478	10.4515	5.50191	1.37163e-05	0.000121866	2.29052
6281	S100A10	1q21.3	0.518502	9.34971	5.49789	1.38513e-05	0.000122958	2.34241
221079	ARL5B	10p12.31	-0.681303	6.11249	-5.49568	1.39263e-05	0.000123515	2.58826
55790	CSGALNACT1	8p21.3	2.70896	2.31844	5.49381	1.39898e-05	0.000123969	3.16645
805	CALM2	2p21	-0.518686	9.09634	-5.49192	1.40546e-05	0.000124434	2.32331
11282	MGAT4B	5q35.3	0.50987	7.71645	5.48954	1.41365e-05	0.00012505	2.39297
3725	JUN	1p32.1	1.00776	7.61579	5.48792	1.41925e-05	0.00012532	2.42718
2257	FGF12	3q28-q29	2.2336	2.49781	5.48763	1.42023e-05	0.00012532	3.20988
155185	AMZ1	7p22.3	-1.46022	3.38359	-5.48755	1.42052e-05	0.00012532	3.12941
6119	RPA3	7p21.3	-0.981885	4.60214	-5.48722	1.42166e-05	0.00012532	2.7937
283848	CES4A	16q22.1	1.17321	4.81487	5.48581	1.42657e-05	0.000125643	2.92048
65109	UPF3B	Xq24	-0.699839	5.38946	-5.48437	1.43158e-05	0.000125974	2.67575
9620	CELSR1	22q13.31	-0.586286	8.07721	-5.48157	1.44141e-05	0.000126576	2.3525
55093	WDYHV1	8q24.13	-0.826474	4.63087	-5.4812	1.44272e-05	0.000126576	2.80858
9371	KIF3B	20q11.21	0.516661	7.19371	5.48105	1.44325e-05	0.000126576	2.42996
1515	CTSV	9q22.33	-1.01868	2.72524	-5.48099	1.44343e-05	0.000126576	3.01209
8683	SRSF9	12q24.31	0.54781	7.05611	5.47923	1.44965e-05	0.000127011	2.43677
2870	GRK6	5q35.3	-0.687447	5.71188	-5.47764	1.45532e-05	0.000127397	2.57154
81628	TSC22D4	7q22.1	0.655417	5.69021	5.47439	1.46688e-05	0.000128298	2.62241
5433	POLR2D	2q14.3	-0.649579	5.80151	-5.46811	1.48957e-05	0.00013017	2.5788
7077	TIMP2	17q25.3	0.510785	7.14914	5.46538	1.49953e-05	0.000130862	2.40645
607	BCL9	1q21.2	0.523468	6.67089	5.46523	1.50008e-05	0.000130862	2.46477
123811	FOPNL	16p13.11	-0.713914	5.89246	-5.46254	1.50997e-05	0.000131611	2.53611
29925	GMPPB	3p21.31	-0.913256	3.88986	-5.45222	1.54852e-05	0.000134854	2.91497
65998	C11orf95	11q13.1	1.24702	4.27355	5.43465	1.61647e-05	0.000140583	2.88668
26207	PITPNC1	17q24.2	0.711664	6.07392	5.43449	1.61708e-05	0.000140583	2.46612
116236	ABHD15	17q11.2	1.0421	4.73515	5.43342	1.62133e-05	0.000140796	2.79829
5621	PRNP	20p13	-0.777917	5.49117	-5.43317	1.62232e-05	0.000140796	2.54487
1649	DDIT3	12q13.3	-0.991584	4.0709	-5.42698	1.64707e-05	0.000142822	2.75331
7035	TFPI	2q32.1	1.2851	4.12062	5.42449	1.65712e-05	0.000143569	2.86985
54732	TMED9	5q35.3	-0.464642	8.04504	-5.4225	1.66522e-05	0.000144148	2.20684
2189	FANCG	9p13.3	-0.867237	4.132	-5.42114	1.67075e-05	0.000144502	2.73735
64762	GAREM1	18q12.1	0.846451	5.06256	5.41771	1.68482e-05	0.000145595	2.59654
9367	RAB9A	Xp22.2	0.569897	5.84136	5.417	1.68776e-05	0.000145724	2.45552
1152	CKB	14q32.33	1.02531	3.9459	5.41063	1.71426e-05	0.000147886	2.8015
4212	MEIS2	15q14	-0.834029	3.98055	-5.40832	1.72399e-05	0.000148599	2.70466
387103	CENPW	6q22.32	-2.62092	1.66037	-5.407	1.72955e-05	0.000148951	3.03848
9401	RECQL4	8q24.3	-0.994342	4.45317	-5.40468	1.73941e-05	0.000149536	2.56961
2108	ETFA	15q24.2-q24.3	0.44102	8.84807	5.40467	1.73943e-05	0.000149536	2.12632
10036	CHAF1A	19p13.3	-1.01088	3.879	-5.40435	1.74079e-05	0.000149536	2.70697
4646	MYO6	6q14.1	0.476647	8.37232	5.40374	1.74343e-05	0.000149636	2.15064
124044	SPATA2L	16q24.3	0.916776	4.94997	5.39591	1.77714e-05	0.0001524	2.59666
6909	TBX2	17q23.2	0.520046	7.8518	5.3906	1.80042e-05	0.000154265	2.14903
84287	ZDHHC16	10q24.1	0.636675	6.28896	5.38702	1.81625e-05	0.000155489	2.31094
23221	RHOBTB2	8p21.3	0.758722	5.1678	5.38654	1.81837e-05	0.000155539	2.52059
90557	CCDC74A	2q21.1	-0.856289	4.99894	-5.38291	1.83463e-05	0.000156797	2.54316
164832	LONRF2	2q11.2	-0.727013	6.80097	-5.37518	1.86969e-05	0.000159659	2.22808
7048	TGFBR2	3p24.1	0.881062	5.21393	5.37371	1.87645e-05	0.0001601	2.51474
10125	RASGRP1	15q14	-2.78135	2.23126	-5.37303	1.87954e-05	0.000160158	2.89163
81929	SEH1L	18p11.21	-0.620658	5.79552	-5.37287	1.88029e-05	0.000160158	2.34267
84986	ARHGAP19	10q24.1	-0.982766	3.95275	-5.36592	1.91257e-05	0.00016277	2.5994
5799	PTPRN2	7q36.3	2.24429	3.13017	5.36528	1.91558e-05	0.000162881	2.91509
23658	LSM5	7p14.3	-0.707774	5.55301	-5.36485	1.91763e-05	0.000162881	2.36368
23151	GRAMD4	22q13.31	0.569006	6.34121	5.36462	1.91871e-05	0.000162881	2.24779
92558	BICDL1	12q24.23	0.802901	4.84483	5.36202	1.93095e-05	0.000163782	2.56512
23212	RRS1	8q13.1	-0.996887	4.14099	-5.35733	1.95329e-05	0.000165538	2.66579
22883	CLSTN1	1p36.22	0.497747	8.24903	5.35461	1.96633e-05	0.000166503	2.02592
2690	GHR	5p13.1-p12	1.05506	4.93518	5.352	1.97898e-05	0.000167434	2.55019
8125	ANP32A	15q23	-0.480716	7.48612	-5.35052	1.98618e-05	0.000167903	2.05767
116441	TM4SF18	3q25.1	2.11355	3.31016	5.34889	1.99412e-05	0.000168345	2.90507
10492	SYNCRIP	6q14.3	-0.505254	8.08636	-5.34876	1.99474e-05	0.000168345	2.02378
79980	DSN1	20q11.23	-1.04602	3.90488	-5.34232	2.02648e-05	0.000170881	2.6191
387066	SNHG5	6q14.3	-0.757501	5.30723	-5.33484	2.06401e-05	0.000173759	2.29964
3251	HPRT1	Xq26.2-q26.3	-0.89602	4.91563	-5.33483	2.06406e-05	0.000173759	2.41378
3691	ITGB4	17q25.1	0.512003	7.59234	5.33434	2.06656e-05	0.000173825	2.01702
55168	MRPS18A	6p21.1	-0.644005	5.4278	-5.32947	2.09136e-05	0.000175635	2.27292
7163	TPD52	8q21.13	-0.622447	6.84897	-5.32943	2.09155e-05	0.000175635	2.07512
145978	LINC00052	15q25.3	-5.77186	1.89716	-5.32906	2.0935e-05	0.000175652	2.65852
4061	LY6E	8q24.3	0.545051	8.40653	5.32844	2.09668e-05	0.000175774	1.95744
123096	SLC25A29	14q32.2	0.724216	6.15629	5.32551	2.11177e-05	0.000176892	2.20407
9124	PDLIM1	10q23.33	0.657714	6.00875	5.32469	2.11605e-05	0.000177103	2.25013
29121	CLEC2D	12p13.31	1.64817	3.86568	5.31907	2.14543e-05	0.000179414	2.67955
3720	JARID2	6p22.3	-0.569966	6.21763	-5.31709	2.15587e-05	0.000180138	2.12307
56904	SH3GLB2	9q34.11	0.621835	7.81196	5.3083	2.20288e-05	0.000183913	1.94518
51765	STK26	Xq26.2	-0.561914	7.39605	-5.30527	2.21935e-05	0.000184899	1.975
5426	POLE	12q24.33	-0.89199	5.71119	-5.30516	2.21994e-05	0.000184899	2.1403
2065	ERBB3	12q13.2	0.448218	9.95528	5.30511	2.22018e-05	0.000184899	1.82048
10396	ATP8A1	4p13	1.13798	4.14099	5.30432	2.22449e-05	0.000185026	2.53828
134492	NUDCD2	5q34	-0.886704	4.01421	-5.30416	2.22537e-05	0.000185026	2.45984
126282	TNFAIP8L1	19p13.3	-1.6523	2.17481	-5.30298	2.23184e-05	0.000185412	2.76647
2049	EPHB3	3q27.1	0.626602	5.71416	5.30221	2.23605e-05	0.000185609	2.20026
5214	PFKP	10p15.2	-0.566045	7.40967	-5.29982	2.24923e-05	0.000186549	1.95506
55337	C19orf66	19p13.2	1.09116	3.78098	5.29288	2.28787e-05	0.000189598	2.61819
57468	SLC12A5	20q13.12	0.952276	4.50031	5.2904	2.30187e-05	0.000190486	2.4185
51649	MRPS23	17q22	-0.568493	7.04336	-5.28982	2.30513e-05	0.000190486	1.97147
10766	TOB2	22q13.2	0.520694	7.25995	5.28968	2.30593e-05	0.000190486	1.95036
2037	EPB41L2	6q23.1-q23.2	0.586434	6.86686	5.28965	2.30612e-05	0.000190486	1.98773
80004	ESRP2	16q22.1	0.486412	8.01168	5.28895	2.31009e-05	0.000190658	1.88594
7791	ZYX	7q34	0.631275	6.26568	5.28632	2.32507e-05	0.000191737	2.09589
90060	CCDC120	Xp11.23	0.665401	5.41706	5.28496	2.33282e-05	0.00019222	2.22967
10014	HDAC5	17q21.31	0.725906	5.0041	5.28309	2.34356e-05	0.000192947	2.24994
3105	HLA-A	6p22.1	-0.639719	5.98821	-5.28099	2.35571e-05	0.000193736	2.05546
440465	BAIAP2-DT	17q25.3	0.743482	5.32319	5.28065	2.35764e-05	0.000193736	2.25931
6734	SRPRA	11q24.2	-0.428973	7.9188	-5.28044	2.35889e-05	0.000193736	1.86775
57828	CATSPERG	19q13.2	1.18722	4.45354	5.27685	2.37979e-05	0.000195294	2.53717
63941	NECAB3	20q11.22	0.905024	5.56531	5.27538	2.38837e-05	0.000195714	2.15619
4088	SMAD3	15q22.33	0.54638	7.02361	5.27531	2.38879e-05	0.000195714	1.955
7023	TFAP4	16p13.3	-1.04111	3.80892	-5.27255	2.40505e-05	0.000196887	2.45889
25788	RAD54B	8q22.1	-1.31516	3.21516	-5.27219	2.40714e-05	0.000196898	2.54479
28960	DCPS	11q24.2	-0.898045	3.86407	-5.27137	2.41201e-05	0.000197137	2.41194
84105	PCBD2	5q31.1	-0.86295	4.1551	-5.27032	2.41825e-05	0.000197487	2.41411
55326	AGPAT5	8p23.1	-0.821903	4.4594	-5.26978	2.42148e-05	0.000197591	2.35126
63875	MRPL17	11p15.4	-0.623616	5.34531	-5.26398	2.45624e-05	0.000200266	2.15864
118812	MORN4	10q24.2	-1.19369	3.50859	-5.26284	2.46314e-05	0.000200667	2.54937
64782	AEN	15q26.1	-1.05417	5.47849	-5.25989	2.48102e-05	0.00020196	2.30026
144455	E2F7	12q21.2	-2.18249	2.23607	-5.25785	2.49352e-05	0.000202815	2.67866
4324	MMP15	16q21	0.587738	6.38426	5.25727	2.49706e-05	0.000202939	1.97387
55754	TMEM30A	6q14.1	0.64849	6.98676	5.25652	2.5017e-05	0.000203153	1.90601
55743	CHFR	12q24.33	0.734153	5.08136	5.25303	2.52326e-05	0.000204739	2.23311
55898	UNC45A	15q26.1	0.522836	7.23583	5.24868	2.5504e-05	0.000206775	1.85286
9518	GDF15	19p13.11	-1.66886	4.53761	-5.24773	2.55633e-05	0.000207002	2.5561
8045	RASSF7	11p15.5	1.1235	4.7393	5.24758	2.5573e-05	0.000207002	2.31243
1030	CDKN2B	9p21.3	1.39441	4.06124	5.24647	2.56429e-05	0.000207401	2.50643
10726	NUDC	1p36.11	-0.528986	6.8132	-5.24229	2.59078e-05	0.000209376	1.87558
8050	PDHX	11p13	-0.632434	5.45881	-5.23293	2.65112e-05	0.000214082	2.05023
9935	MAFB	20q12	1.07127	3.74142	5.23199	2.65723e-05	0.000214404	2.45753
55196	KIAA1551	12p11.21	-0.69405	5.11036	-5.23152	2.66034e-05	0.000214483	2.09427
9991	PTBP3	9q32	-0.583899	7.13105	-5.22831	2.68139e-05	0.000215857	1.79888
140462	ASB9	Xp22.2	1.22999	3.19383	5.22827	2.68165e-05	0.000215857	2.50351
25984	KRT23	17q21.2	-1.07788	3.35656	-5.22673	2.69184e-05	0.000216459	2.4312
79778	MICALL2	7p22.3	0.747236	6.14094	5.22649	2.69342e-05	0.000216459	1.96515
10513	APPBP2	17q23.2	0.432578	10.2668	5.22543	2.70049e-05	0.000216693	1.61938
6729	SRP54	14q13.2	-0.476887	6.78761	-5.22541	2.70062e-05	0.000216693	1.83871
29080	CCDC59	12q21.31	-0.75548	5.01276	-5.22303	2.71649e-05	0.000217794	2.12347
1298	COL9A2	1p34.2	1.34434	3.14796	5.22038	2.73427e-05	0.000219045	2.52778
5818	NECTIN1	11q23.3	-0.586235	6.7423	-5.21971	2.73878e-05	0.000219074	1.82864
10627	MYL12A	18p11.31	0.44034	9.39581	5.21968	2.73897e-05	0.000219074	1.64929
119391	GSTO2	10q25.1	-0.778748	4.38369	-5.21731	2.75501e-05	0.000220183	2.18035
80228	ORAI2	7q22.1	0.755915	5.12599	5.21466	2.77299e-05	0.000221445	2.12848
7433	VIPR1	3p22.1	0.776657	4.77546	5.21296	2.78461e-05	0.000222197	2.18919
26751	SH3YL1	2p25.3	0.810496	6.71422	5.20893	2.81241e-05	0.000224238	1.84813
64689	GORASP1	3p22.2	0.58475	6.03022	5.20798	2.81895e-05	0.000224582	1.93591
79989	TTC26	7q34	-0.873557	4.0719	-5.20652	2.82911e-05	0.000225214	2.23854
219844	HYLS1	11q24.2	-1.08827	3.65356	-5.20609	2.8321e-05	0.000225275	2.35025
8503	PIK3R3	1p34.1	0.586146	7.49304	5.20513	2.83886e-05	0.000225635	1.72937
7203	CCT3	1q22	-0.404069	8.80082	-5.19761	2.89187e-05	0.000229668	1.61246
7516	XRCC2	7q36.1	-1.58623	2.24601	-5.19483	2.91176e-05	0.000231065	2.52966
10749	KIF1C	17p13.2	0.492524	7.04424	5.19359	2.92063e-05	0.000231515	1.75196
7057	THBS1	15q14	0.539529	8.57334	5.1934	2.92201e-05	0.000231515	1.61185
9093	DNAJA3	16p13.3	-0.538118	6.9669	-5.19135	2.93682e-05	0.000232506	1.72403
4976	OPA1	3q29	-0.434052	7.65391	-5.18532	2.98079e-05	0.000235802	1.647
3033	HADH	4q25	-0.548503	5.77652	-5.18478	2.9847e-05	0.000235927	1.84043
9588	PRDX6	1q25.1	-0.388542	8.66055	-5.18416	2.98931e-05	0.000236106	1.58206
134	ADORA1	1q32.1	-2.54066	1.09028	-5.18354	2.99387e-05	0.000236282	2.41004
4860	PNP	14q11.2	-0.578521	5.61383	-5.18258	3.00097e-05	0.000236657	1.91303
292	SLC25A5	Xq24	-0.454932	8.51884	-5.18193	3.00575e-05	0.000236849	1.58354
6388	SDF2	17q11.2	0.715668	5.73046	5.18121	3.01112e-05	0.000237088	1.93042
387509	GPR153	1p36.31	1.59529	3.06647	5.18022	3.01845e-05	0.0002374	2.50315
162	AP1B1	22q12.2	-0.511382	7.66401	-5.18004	3.01979e-05	0.0002374	1.63225
55239	OGFOD1	16q13	-0.638493	5.57241	-5.17967	3.02252e-05	0.00023743	1.91406
7259	TSPYL1	6q22.1	0.457658	8.00889	5.17929	3.02537e-05	0.000237469	1.62013
151963	MB21D2	3q29	0.952219	4.74437	5.17807	3.03448e-05	0.000238	2.13039
57524	CASKIN1	16p13.3	1.33603	3.30724	5.17585	3.0511e-05	0.000239118	2.40339
3980	LIG3	17q12	-0.715709	5.52746	-5.17246	3.07667e-05	0.000240934	1.88238
5373	PMM2	16p13.2	-0.532278	6.47472	-5.17189	3.081e-05	0.000241086	1.76654
143458	LDLRAD3	11p13	-0.823686	4.49286	-5.17094	3.08824e-05	0.000241466	2.13632
219699	UNC5B	10q22.1	-1.21649	3.50065	-5.16916	3.10186e-05	0.000242343	2.30653
3141	HLCS	21q22.13	-0.597804	5.45853	-5.16834	3.10812e-05	0.000242645	1.87807
3321	IGSF3	1p13.1	0.494242	9.31027	5.16663	3.12121e-05	0.000243478	1.512
11237	RNF24	20p13	-0.902556	4.16527	-5.16502	3.1336e-05	0.000244256	2.13027
133619	PRRC1	5q23.2	-0.539665	7.12157	-5.16331	3.14688e-05	0.000245103	1.63843
84267	C9orf64	9q21.32	-0.697699	4.7335	-5.16244	3.15366e-05	0.000245441	2.0015
23594	ORC6	16q11.2	-1.4476	1.94395	-5.16167	3.1596e-05	0.000245714	2.40515
3748	KCNC3	19q13.33	1.46487	4.82932	5.16134	3.16221e-05	0.000245728	2.14273
3398	ID2	2p25.1	0.590045	6.66448	5.15909	3.17977e-05	0.000246903	1.65887
8916	HERC3	4q22.1	1.15417	3.45048	5.15621	3.20245e-05	0.000248394	2.30965
91862	MARVELD3	16q22.2	0.629235	5.77374	5.15602	3.20389e-05	0.000248394	1.83124
79711	IPO4	14q12	-0.648665	6.43154	-5.15522	3.21027e-05	0.000248698	1.70559
1318	SLC31A2	9q32	1.09582	4.07938	5.15325	3.22589e-05	0.000249716	2.29458
79903	NAA60	16p13.3	0.566709	6.79116	5.15003	3.25157e-05	0.000251511	1.66389
4691	NCL	2q37.1	-0.453528	9.38952	-5.14962	3.25486e-05	0.000251573	1.46529
3992	FADS1	11q12.2	-0.633547	6.30487	-5.14877	3.26175e-05	0.000251913	1.72468
727	C5	9q33.2	-1.48967	1.9249	-5.14581	3.28557e-05	0.000253559	2.41232
122786	FRMD6	14q22.1	0.821825	5.08584	5.14544	3.28857e-05	0.000253597	1.92791
403	ARL3	10q24.32	-0.625172	5.62927	-5.14369	3.30279e-05	0.000254499	1.81846
3340	NDST1	5q33.1	0.583835	6.65006	5.14249	3.3126e-05	0.00025506	1.66388
134637	ADAT2	6q24.2	-2.15696	2.02782	-5.13741	3.35436e-05	0.000257918	2.42033
53349	ZFYVE1	14q24.2	0.722807	5.17525	5.13735	3.35483e-05	0.000257918	1.92318
6240	RRM1	11p15.4	-0.68532	6.227	-5.13368	3.38539e-05	0.00026007	1.6499
118980	SFXN2	10q24.32	-0.969197	4.91583	-5.12797	3.43341e-05	0.000263559	1.96472
2717	GLA	Xq22.1	-0.824669	4.66568	-5.12708	3.44092e-05	0.000263839	1.9996
7398	USP1	1p31.3	-0.644459	6.03072	-5.12692	3.44228e-05	0.000263839	1.67902
23225	NUP210	3p25.1	-0.527131	8.01711	-5.12643	3.44643e-05	0.000263956	1.46051
2624	GATA2	3q21.3	0.76428	4.95211	5.12354	3.47111e-05	0.000265645	1.92834
4170	MCL1	1q21.2	0.506925	9.10546	5.11643	3.5326e-05	0.000270146	1.40345
84335	AKT1S1	19q13.33	0.60399	6.18863	5.1155	3.54067e-05	0.000270559	1.66203
8795	TNFRSF10B	8p21.3	-0.71618	6.42693	-5.11512	3.54397e-05	0.000270606	1.671
5829	PXN	12q24.23	0.421713	8.31453	5.11389	3.55476e-05	0.000271225	1.43245
3158	HMGCS2	1p12	2.28037	2.18977	5.11335	3.55955e-05	0.000271385	2.36433
5198	PFAS	17p13.1	-0.818165	4.35965	-5.1127	3.56525e-05	0.000271615	1.96174
56142	PCDHA6	5q31.3	-1.75817	2.33014	-5.10923	3.59586e-05	0.000273741	2.33847
3192	HNRNPU	1q44	-0.5038	9.06453	-5.1071	3.6148e-05	0.000274976	1.37098
195828	ZNF367	9q22.32	-1.69637	1.92485	-5.10468	3.6365e-05	0.000276418	2.31196
5526	PPP2R5B	11q13.1	1.18726	3.53161	5.10402	3.64239e-05	0.000276658	2.21943
55605	KIF21A	12q12	-0.552741	5.61733	-5.1031	3.65073e-05	0.000277082	1.70269
154810	AMOTL1	11q21	-0.780874	4.78029	-5.10188	3.66169e-05	0.000277705	1.92191
5287	PIK3C2B	1q32.1	0.485173	6.65518	5.09874	3.69026e-05	0.000279662	1.55124
220441	RNF152	18q21.33	-1.08408	3.62333	-5.09572	3.71786e-05	0.000281543	2.04866
11163	NUDT4	12q22	0.52967	6.71	5.09346	3.7386e-05	0.000282902	1.50836
10765	KDM5B	1q32.1	0.422419	8.7991	5.09062	3.76497e-05	0.000284683	1.35289
1479	CSTF3	11p13	-0.702126	5.48133	-5.09026	3.7683e-05	0.000284688	1.69833
100506365	OTUD6B-AS1	8q21.3	-0.916648	5.2813	-5.09001	3.77066e-05	0.000284688	1.77255
153241	CEP120	5q23.2	-0.867883	4.5559	-5.08916	3.77854e-05	0.000285069	1.86225
27076	LYPD3	19q13.31	0.53083	7.07264	5.08823	3.78725e-05	0.000285317	1.46115
23371	TNS2	12q13.13	0.868982	4.44343	5.0882	3.78747e-05	0.000285317	1.92389
4784	NFIX	19p13.13	1.24871	3.05908	5.08656	3.80291e-05	0.000286267	2.18087
131601	TPRA1	3q21.3	0.703139	4.86218	5.07875	3.87693e-05	0.000291621	1.8137
51545	ZNF581	19q13.42	0.814107	5.16614	5.07694	3.89427e-05	0.000292524	1.75699
3913	LAMB2	3p21.31	0.53643	7.5093	5.07681	3.89554e-05	0.000292524	1.39314
6731	SRP72	4q12	-0.521968	7.65582	-5.07641	3.8994e-05	0.000292524	1.36912
80129	CCDC170	6q25.1	-0.61499	5.79397	-5.0763	3.90051e-05	0.000292524	1.60339
126410	CYP4F22	19p13.12	-2.25584	2.72531	-5.07408	3.9219e-05	0.00029391	2.22443
23245	ASTN2	9q33.1	0.754672	4.93478	5.07179	3.94419e-05	0.000295227	1.81835
23242	COBL	7p12.1	0.563204	5.96655	5.07167	3.94532e-05	0.000295227	1.58093
26090	ABHD12	20p11.21	0.527836	6.715	5.07066	3.95518e-05	0.000295746	1.47012
1503	CTPS1	1p34.2	-0.840005	5.14283	-5.07011	3.96056e-05	0.000295887	1.74321
85395	FAM207A	21q22.3	-0.812274	4.78113	-5.06962	3.96538e-05	0.000295887	1.79675
2289	FKBP5	6p21.31	-0.649384	5.69666	-5.06957	3.96586e-05	0.000295887	1.581
27154	BRPF3	6p21.31	0.566121	6.24524	5.06826	3.97872e-05	0.000296627	1.52546
5546	PRCC	1q23.1	0.529947	6.52548	5.06333	4.02746e-05	0.00030004	1.48124
9289	ADGRG1	16q21	-0.574067	7.64022	-5.06145	4.04621e-05	0.000301215	1.33304
22998	LIMCH1	4p13	0.971108	5.04515	5.05798	4.08109e-05	0.000303587	1.74774
100128927	ZBTB42	14q32.33	0.74833	5.34417	5.05595	4.10154e-05	0.000304884	1.67634
29781	NCAPH2	22q13.33	-0.664618	4.94288	-5.05423	4.11907e-05	0.000305962	1.63812
84869	CBR4	4q32.3	-0.655939	4.87743	-5.0528	4.13368e-05	0.000306822	1.70024
5701	PSMC2	7q22.1	-0.510118	6.55591	-5.05198	4.14198e-05	0.000307212	1.43187
5037	PEBP1	12q24.23	0.440668	8.94015	5.04804	4.18259e-05	0.000309997	1.24057
7913	DEK	6p22.3	-0.628669	6.83435	-5.04766	4.18646e-05	0.000310056	1.35964
2967	GTF2H3	12q24.31	-0.562921	5.74622	-5.04732	4.19e-05	0.000310091	1.54096
23130	ATG2A	11q13.1	0.672909	5.75459	5.04634	4.20015e-05	0.000310614	1.56092
9320	TRIP12	2q36.3	0.501701	7.65665	5.04562	4.20766e-05	0.000310794	1.31047
11169	WDHD1	14q22.2-q22.3	-1.09228	3.74093	-5.04552	4.20873e-05	0.000310794	1.87699
165215	FAM171B	2q32.1	0.638564	5.61777	5.04443	4.22003e-05	0.000311401	1.54783
10555	AGPAT2	9q34.3	0.707807	5.6201	5.03889	4.2783e-05	0.00031547	1.55742
5217	PFN2	3q25.1	0.418657	8.19949	5.03728	4.29533e-05	0.000316495	1.25185
9669	EIF5B	2q11.2	-0.513739	7.11411	-5.03684	4.30003e-05	0.000316587	1.33902
25953	PNKD	2q35	0.483339	6.48398	5.03657	4.30286e-05	0.000316587	1.40848
64759	TNS3	7p12.3	0.922221	4.83417	5.03621	4.30674e-05	0.000316642	1.70193
9143	SYNGR3	16p13.3	1.09649	4.21606	5.03501	4.31951e-05	0.000317351	1.86804
57175	CORO1B	11q13.2	0.448225	7.90454	5.03369	4.33362e-05	0.000318156	1.25226
64900	LPIN3	20q12	0.804028	5.96173	5.03223	4.34926e-05	0.000319072	1.50246
6302	TSPAN31	12q14.1	0.565973	6.30965	5.02785	4.39663e-05	0.000322314	1.45182
51107	APH1A	1q21.2	0.45179	8.54208	5.02333	4.44611e-05	0.000325704	1.1923
2971	GTF3A	13q12.2	-0.533413	6.73177	-5.02165	4.46454e-05	0.000326817	1.336
55197	RPRD1A	18q12.2	-0.490659	6.50606	-5.01993	4.48355e-05	0.000327971	1.37011
9169	SCAF11	12q12	0.502954	8.80665	5.01449	4.54434e-05	0.000332095	1.16523
10018	BCL2L11	2q13	-0.524038	6.09669	-5.0143	4.54651e-05	0.000332095	1.3813
56975	FAM20C	7p22.3	1.49295	3.94958	5.01268	4.56476e-05	0.000333188	1.89321
4296	MAP3K11	11q13.1	0.525986	6.25344	5.01197	4.57274e-05	0.000333477	1.38857
8560	DEGS1	1q42.11	-0.787951	4.59205	-5.01174	4.57533e-05	0.000333477	1.70627
58526	MID1IP1	Xp11.4	-0.592572	5.40991	-5.00957	4.60001e-05	0.000335035	1.44703
79745	CLIP4	2p23.2	3.29703	2.17057	5.00905	4.60591e-05	0.000335222	1.97634
116832	RPL39L	3q27.3	-1.07406	3.45261	-5.00867	4.61028e-05	0.000335299	1.84153
84309	NUDT16L1	16p13.3	0.705694	5.34465	5.00711	4.62801e-05	0.000336346	1.58173
5937	RBMS1	2q24.2	0.818446	5.47726	5.00406	4.66313e-05	0.000338602	1.56893
55435	AP1AR	4q25	-0.577888	5.43631	-5.00383	4.66574e-05	0.000338602	1.48197
5600	MAPK11	22q13.33	1.34248	3.67557	5.00349	4.66974e-05	0.000338648	2.03494
9568	GABBR2	9q22.33	4.48184	1.71605	5.00286	4.67693e-05	0.000338787	1.92132
121274	ZNF641	12q13.11	0.657239	5.28558	5.00252	4.68088e-05	0.000338787	1.55644
22980	TCF25	16q24.3	0.443774	7.90624	5.00245	4.68172e-05	0.000338787	1.17748
23263	MCF2L	13q34	0.574423	6.08009	4.99826	4.73055e-05	0.000342076	1.35783
113878	DTX2	7q11.23	0.948421	3.77851	4.99593	4.75791e-05	0.000343808	1.88133
6612	SUMO3	21q22.3	0.427392	8.22097	4.99384	4.78255e-05	0.000345342	1.13992
90007	MIDN	19p13.3	0.563963	7.08219	4.99349	4.78669e-05	0.000345394	1.24915
51142	CHCHD2	7p11.2	-0.477263	7.90898	-4.99251	4.7983e-05	0.000345985	1.14902
23180	RFTN1	3p24.3	1.67814	2.3816	4.99128	4.81291e-05	0.00034679	2.07673
4792	NFKBIA	14q13.2	0.581114	6.30329	4.98636	4.87185e-05	0.000350719	1.3288
23300	ATMIN	16q23.2	0.420046	7.89149	4.98615	4.87437e-05	0.000350719	1.14223
147040	KCTD11	17p13.1	0.878814	4.26208	4.98468	4.8922e-05	0.000351751	1.76761
4897	NRCAM	7q31.1	-0.409575	7.88884	-4.97893	4.96229e-05	0.000356405	1.13089
5702	PSMC3	11p11.2	-0.507556	7.1308	-4.97879	4.96398e-05	0.000356405	1.17219
8938	BAIAP3	16p13.3	0.750063	5.29747	4.9762	4.99601e-05	0.000358449	1.46563
23145	SSPO	7q36.1	1.1286	4.76993	4.97478	5.01356e-05	0.000359453	1.5767
11190	CEP250	20q11.22	-0.683015	5.26858	-4.97427	5.01993e-05	0.000359655	1.43386
4924	NUCB1	19q13.33	0.490937	7.82328	4.97376	5.02626e-05	0.000359853	1.11326
2288	FKBP4	12p13.33	-0.413857	8.45397	-4.97288	5.03719e-05	0.00036038	1.07531
54541	DDIT4	10q22.1	-0.856679	6.9094	-4.97246	5.04245e-05	0.000360501	1.15978
79170	PRR15L	17q21.32	0.651808	5.97473	4.96564	5.12827e-05	0.000366377	1.3289
84818	IL17RC	3p25.3	0.559172	5.72076	4.96455	5.14215e-05	0.00036711	1.33396
64097	EPB41L4A	5q22.1-q22.2	0.792191	4.77413	4.9558	5.2548e-05	0.000374887	1.55757
4175	MCM6	2q21.3	-0.730497	6.09016	-4.95469	5.26932e-05	0.00037551	1.21983
9679	FAM53B	10q26.13	0.535196	5.77684	4.95452	5.27147e-05	0.00037551	1.3149
5692	PSMB4	1q21.3	0.397996	8.47098	4.95428	5.27468e-05	0.00037551	1.02725
9635	CLCA2	1p22.3	-1.39436	4.16264	-4.95079	5.32038e-05	0.000378496	1.83421
5465	PPARA	22q13.31	0.94613	3.71449	4.95023	5.32781e-05	0.000378758	1.69733
23287	AGTPBP1	9q21.33	-0.946273	4.16478	-4.94901	5.34391e-05	0.000379636	1.59861
192683	SCAMP5	15q24.2	0.86894	4.64299	4.94588	5.38558e-05	0.000382327	1.58818
23265	EXOC7	17q25.1	0.490092	7.04482	4.94393	5.41164e-05	0.000383907	1.1257
4361	MRE11	11q21	-0.715707	4.66529	-4.94174	5.44105e-05	0.000385723	1.47827
3337	DNAJB1	19p13.12	0.544824	6.8911	4.94031	5.46028e-05	0.000386815	1.14646
9429	ABCG2	4q22.1	0.751906	5.2761	4.9393	5.47405e-05	0.000387518	1.40841
9185	REPS2	Xp22.2	0.77271	4.88395	4.93896	5.47866e-05	0.000387573	1.48713
51090	PLLP	16q13	1.35858	2.85533	4.93734	5.50067e-05	0.000388858	1.91391
79000	AUNIP	1p36.11	-1.39261	2.70085	-4.93584	5.52116e-05	0.000389774	1.86564
351	APP	21q21.3	0.403014	9.97404	4.93583	5.52134e-05	0.000389774	0.908251
60496	AASDHPPT	11q22.3	0.711186	5.5221	4.93551	5.52565e-05	0.000389805	1.3233
11331	PHB2	12p13.31	-0.417266	7.54408	-4.93501	5.53246e-05	0.000390013	1.02366
4814	NINJ1	9q22.31	0.529427	6.98218	4.93446	5.54007e-05	0.000390278	1.11197
23654	PLXNB2	22q13.33	0.48066	9.16778	4.93282	5.56257e-05	0.000391589	0.9458
80155	NAA15	4q31.1	-0.579745	5.97662	-4.93163	5.57909e-05	0.000392479	1.23562
79567	RIPOR1	16q22.1	0.718397	5.42661	4.93122	5.58465e-05	0.000392597	1.3522
1399	CRKL	22q11.21	-0.497291	7.31842	-4.92939	5.6101e-05	0.000394111	1.0332
5062	PAK2	3q29	0.385505	9.55876	4.92392	5.68672e-05	0.000399216	0.903798
129642	MBOAT2	2p25.1	0.539578	6.16614	4.92334	5.69483e-05	0.000399508	1.1789
1627	DBN1	5q35.3	0.658335	6.63842	4.92042	5.73613e-05	0.000402126	1.14291
79874	RABEP2	16p11.2	0.748188	5.36227	4.9166	5.79081e-05	0.000405678	1.32027
3930	LBR	1q42.12	-0.999199	3.5531	-4.91592	5.80057e-05	0.00040608	1.5627
10623	POLR3C	1q21.1	-0.538391	5.95093	-4.91406	5.82729e-05	0.000407565	1.17884
4254	KITLG	12q21.32	0.527541	7.93938	4.91388	5.82986e-05	0.000407565	0.96941
51514	DTL	1q32.3	-1.85317	1.74514	-4.91271	5.84682e-05	0.000408469	1.81549
4552	MTRR	5p15.31	-0.645984	5.01775	-4.91174	5.86092e-05	0.000409171	1.34567
9993	DGCR2	22q11.21	0.553433	6.72864	4.91142	5.86558e-05	0.000409213	1.07931
6810	STX4	16p11.2	0.593319	5.91158	4.91104	5.87105e-05	0.000409312	1.21863
114884	OSBPL10	3p23	0.684988	6.15498	4.91001	5.88609e-05	0.000410078	1.17484
23286	WWC1	5q34	0.558303	6.4452	4.90967	5.89102e-05	0.000410139	1.12299
151354	FAM84A	2p24.3	0.881567	4.66096	4.90907	5.89988e-05	0.000410472	1.50776
285958	SNHG15	7p13	-1.60651	2.67096	-4.90781	5.91835e-05	0.000411474	1.84021
51637	RTRAF	14q22.1	-0.487605	6.55387	-4.90513	5.95768e-05	0.000413923	1.08079
4798	NFRKB	11q24.3	0.575602	6.11087	4.9034	5.98339e-05	0.000415424	1.1403
643641	ZNF862	7q36.1	0.734584	5.40305	4.90255	5.996e-05	0.000416014	1.27642
10423	CDIPT	16p11.2	0.506475	7.28191	4.90122	6.01578e-05	0.000417099	0.984845
22941	SHANK2	11q13.3-q13.4	0.513685	6.81412	4.90093	6.02007e-05	0.000417111	1.03252
55111	PLEKHJ1	19p13.3	0.643227	5.03062	4.89536	6.10389e-05	0.000422629	1.32815
197259	MLKL	16q23.1	-1.01699	3.31081	-4.89471	6.11368e-05	0.000423017	1.67072
1181	CLCN2	3q27.1	0.953777	4.17409	4.89184	6.15727e-05	0.000425507	1.52746
11051	NUDT21	16q13	-0.602474	7.35305	-4.89179	6.1581e-05	0.000425507	0.929579
10960	LMAN2	5q35.3	-0.40604	7.94649	-4.89041	6.17915e-05	0.00042667	0.887214
54453	RIN2	20p11.23	1.68293	3.97374	4.8876	6.22242e-05	0.000429364	1.66699
51655	RASD1	17p11.2	1.31663	3.51938	4.8872	6.22855e-05	0.000429493	1.69551
387893	KMT5A	12q24.31	-0.488373	6.01464	-4.88634	6.24193e-05	0.000430123	1.06606
1457	CSNK2A1	20p13	-0.424796	7.14603	-4.88517	6.26006e-05	0.000431078	0.942914
10272	FSTL3	19p13.3	0.673017	5.43117	4.88316	6.29128e-05	0.000432933	1.27359
125144	LRRC75A-AS1	17p11.2	-0.578822	7.74162	-4.88272	6.29814e-05	0.000432933	0.88574
55737	VPS35	16q11.2	-0.475864	7.47558	-4.88261	6.29986e-05	0.000432933	0.903513
92979	2009-03-01	12q14.1	0.713616	5.01443	4.88109	6.32363e-05	0.000434231	1.30787
23028	KDM1A	1p36.12	-0.415363	7.31406	-4.88071	6.32965e-05	0.000434231	0.915101
9209	LRRFIP2	3p22.2	-0.65295	4.77918	-4.88058	6.33165e-05	0.000434231	1.33261
5479	PPIB	15q22.31	-0.444118	7.77499	-4.87953	6.3482e-05	0.000435071	0.872479
2934	GSN	9q33.2	0.467682	7.18573	4.87699	6.38838e-05	0.000437529	1.00518
3178	HNRNPA1	12q13.13	-0.380312	9.81924	-4.87554	6.41131e-05	0.000438801	0.75626
80817	CEP44	4q34.1	-1.01611	3.41585	-4.87259	6.45843e-05	0.000441529	1.6068
80022	MYO15B	17q25.1	0.850549	6.5586	4.87228	6.46338e-05	0.000441529	1.01147
3566	IL4R	16p12.1	0.692679	5.60651	4.87222	6.46428e-05	0.000441529	1.17771
1827	RCAN1	21q22.12	1.30277	4.59188	4.87038	6.49392e-05	0.000443254	1.45613
1366	CLDN7	17p13.1	-0.490573	7.26412	-4.86998	6.50037e-05	0.000443395	0.89402
93663	ARHGAP18	6q22.33	0.936313	4.2526	4.86251	6.62198e-05	0.000451385	1.49365
100132159	CALML3-AS1	10p15.1	1.14689	3.3022	4.85924	6.67587e-05	0.000454752	1.62299
64780	MICAL1	6q21	1.06263	4.58965	4.85867	6.68535e-05	0.000454814	1.41588
57136	APMAP	20p11.21	0.385458	8.94092	4.85864	6.68579e-05	0.000454814	0.761454
79603	CERS4	19p13.2	0.537433	5.43016	4.856	6.72974e-05	0.000457495	1.1061
126075	CCDC159	19p13.2	0.770017	5.13875	4.85458	6.75343e-05	0.000458797	1.23304
50619	DEF6	6p21.31	-1.3641	2.12352	-4.85141	6.80675e-05	0.000462109	1.70901
2101	ESRRA	11q13.1	0.689313	5.46936	4.8505	6.82217e-05	0.000462845	1.13392
2963	GTF2F2	13q14.12-q14.13	-0.852158	4.87914	-4.84676	6.88591e-05	0.000466666	1.25206
1843	DUSP1	5q35.1	1.00989	5.31356	4.84665	6.88773e-05	0.000466666	1.17807
348793	WDR53	3q29	0.759157	4.79204	4.84575	6.90311e-05	0.000467394	1.2661
10265	IRX5	16q12.2	0.565054	6.3781	4.84531	6.91068e-05	0.000467593	0.968539
10915	TCERG1	5q32	-0.579605	5.98121	-4.84461	6.92263e-05	0.000468089	1.00556
4998	ORC1	1p32.3	-1.48272	1.9389	-4.84357	6.94062e-05	0.000468991	1.67858
7247	TSN	2q14.3	-0.489103	6.62737	-4.84138	6.9784e-05	0.000471229	0.894423
210	ALAD	9q32	0.526068	6.24558	4.83866	7.02562e-05	0.0004741	0.966355
23347	SMCHD1	18p11.32	-0.489267	6.51584	-4.83082	7.1636e-05	0.000483089	0.878844
11000	SLC27A3	1q21.3	0.621776	5.58014	4.83024	7.17397e-05	0.000483465	1.07995
9709	HERPUD1	16q13	-0.518074	7.54043	-4.82959	7.18557e-05	0.000483527	0.749961
23165	NUP205	7q33	-0.53957	6.69401	-4.82942	7.18862e-05	0.000483527	0.843807
11043	MID2	Xq22.3	0.597239	6.56258	4.82939	7.18925e-05	0.000483527	0.92623
10535	RNASEH2A	19p13.13	-1.07968	3.82101	-4.82775	7.21847e-05	0.00048495	1.32777
192666	KRT24	17q21.2	1.43113	3.21852	4.82767	7.22e-05	0.00048495	1.61473
3667	IRS1	2q36.3	-0.561697	7.10319	-4.82631	7.24439e-05	0.000486118	0.809424
256302	NATD1	17p11.2	1.18308	3.61887	4.82616	7.24702e-05	0.000486118	1.52044
81577	GFOD2	16q22.1	0.591589	5.60081	4.82221	7.31844e-05	0.000490583	1.04064
51251	NT5C3A	7p14.3	-0.653056	5.37279	-4.82135	7.33405e-05	0.000491304	1.04126
60685	ZFAND3	6p21.2	0.475276	7.3612	4.8176	7.40276e-05	0.000495578	0.777399
5580	PRKCD	3p21.1	0.493265	7.32804	4.81448	7.46018e-05	0.000498941	0.756243
5393	EXOSC9	4q27	-0.725478	4.53302	-4.81434	7.46288e-05	0.000498941	1.20665
64417	TMEM267	5p12	-0.889861	3.73821	-4.81369	7.47492e-05	0.000499416	1.36576
51016	EMC9	14q12	-0.885237	3.97505	-4.81148	7.51599e-05	0.000501828	1.31389
6617	SNAPC1	14q23.2	-1.06956	3.03659	-4.81072	7.53015e-05	0.000502441	1.49936
90390	MED30	8q24.11	-1.15102	2.88943	-4.8097	7.54935e-05	0.00050339	1.51343
1397	CRIP2	14q32.33	0.711176	6.7153	4.80788	7.58358e-05	0.000505339	0.828684
51303	FKBP11	12q13.12	-0.684129	4.85393	-4.80701	7.59997e-05	0.000505928	1.15807
3094	HINT1	5q23.3	-0.649318	7.04678	-4.80688	7.60245e-05	0.000505928	0.739673
118	ADD1	4p16.3	0.388588	8.03759	4.80658	7.60806e-05	0.000505969	0.684821
55646	LYAR	4p16.3	-0.860264	3.95427	-4.80531	7.6321e-05	0.000507234	1.284
1665	DHX15	4p15.2	0.426019	7.90746	4.80445	7.64832e-05	0.000507978	0.689241
1490	CTGF	6q23.2	3.18751	2.66214	4.80346	7.66723e-05	0.000508898	1.64536
3837	KPNB1	17q21.32	-0.402494	8.24341	-4.80132	7.70808e-05	0.000511274	0.653199
84314	TMEM107	17p13.1	-1.07849	3.08936	-4.80092	7.71564e-05	0.00051144	1.46908
8495	PPFIBP2	11p15.4	0.823593	4.72598	4.79723	7.78671e-05	0.000515812	1.10636
6634	SNRPD3	22q11.23	-0.407955	7.76757	-4.79639	7.803e-05	0.000516552	0.664027
151636	DTX3L	3q21.1	0.779224	4.97387	4.79558	7.81862e-05	0.000517247	1.09318
54927	CHCHD3	7q32.3-q33	-0.471558	6.55445	-4.79469	7.83596e-05	0.000517603	0.788856
10867	TSPAN9	12p13.33-p13.32	0.622351	5.63103	4.79454	7.83891e-05	0.000517603	0.943231
10755	GIPC1	19p13.12	0.471923	6.8788	4.79452	7.83937e-05	0.000517603	0.776076
2887	GRB10	7p12.1	-0.603792	5.48446	-4.79394	7.85068e-05	0.000518012	0.916217
10256	CNKSR1	1p36.11	0.663849	5.32422	4.78882	7.95115e-05	0.000524299	0.988493
25974	MMACHC	1p34.1	-1.45025	2.66848	-4.7879	7.96925e-05	0.000525149	1.56994
131474	CHCHD4	3p25.1	-0.681797	4.88091	-4.78591	8.00881e-05	0.000527412	1.05584
54838	WBP1L	10q24.32	0.553171	6.10164	4.78464	8.03401e-05	0.000528727	0.87099
169611	OLFML2A	9q33.3	1.56739	2.67253	4.77884	8.15073e-05	0.000536059	1.54393
22794	CASC3	17q21.1	-0.569766	6.40028	-4.77748	8.17816e-05	0.000537363	0.746596
57217	TTC7A	2p21	-0.570865	5.31287	-4.7771	8.18602e-05	0.000537363	0.934541
367	AR	Xq12	0.467937	7.18051	4.77707	8.18652e-05	0.000537363	0.698997
10439	OLFM1	9q34.3	-0.949816	4.39879	-4.77673	8.19358e-05	0.000537477	1.18783
51596	CUTA	6p21.32	0.528866	7.25485	4.77554	8.21781e-05	0.000538717	0.686825
6827	SUPT4H1	17q22	0.461198	6.86868	4.77142	8.30238e-05	0.000543908	0.712351
8664	EIF3D	22q12.3	-0.408454	7.90427	-4.77047	8.32185e-05	0.000544831	0.599305
1857	DVL3	3q27.1	0.437272	7.49989	4.76879	8.35663e-05	0.000546753	0.628735
23240	TMEM131L	4q31.3	0.642717	5.70957	4.76759	8.38168e-05	0.000548037	0.894069
158	ADSL	22q13.1	-0.54859	5.83465	-4.7619	8.50108e-05	0.000555485	0.814532
5097	PCDH1	5q31.3	0.605665	6.58932	4.76096	8.52077e-05	0.000556412	0.700517
1633	DCK	4q13.3	-0.723601	4.26104	-4.75972	8.54711e-05	0.000557771	1.09231
22984	PDCD11	10q24.33	-0.573099	5.87872	-4.75816	8.58031e-05	0.000559576	0.810877
80709	AKNA	9q32	-0.874608	3.48089	-4.75684	8.60861e-05	0.000561059	1.2834
55739	NAXD	13q34	0.499369	5.94061	4.75529	8.64169e-05	0.000562852	0.806638
388591	RNF207	1p36.31	1.35734	3.14335	4.75163	8.72072e-05	0.000567634	1.44818
84320	ACBD6	1q25.2-q25.3	-0.470761	6.31551	-4.74965	8.76377e-05	0.000570069	0.724322
51088	KLHL5	4p14	0.929494	5.48268	4.74798	8.80023e-05	0.000572072	0.942228
64283	ARHGEF28	5q13.2	-1.26695	3.1247	-4.7461	8.8414e-05	0.000574378	1.40658
481	ATP1B1	1q24.2	0.827938	5.58318	4.74445	8.87765e-05	0.000576362	0.876657
100506548	LOC100506548	5p13.1	-0.648195	5.3766	-4.74222	8.92705e-05	0.000579198	0.855911
55013	MCUB	4q25	-0.802537	4.26654	-4.738	9.02109e-05	0.000584923	1.04148
155066	ATP6V0E2	7q36.1	0.833339	5.27569	4.73665	9.05156e-05	0.000586523	0.923924
5595	MAPK3	16p11.2	0.506619	7.19395	4.73638	9.05752e-05	0.000586533	0.576255
257397	TAB3	Xp21.2	0.649589	6.36285	4.7348	9.0933e-05	0.00058838	0.705427
23534	TNPO3	7q32.1	-0.487826	5.80391	-4.73424	9.10596e-05	0.00058838	0.741351
103910	MYL12B	18p11.31	0.406398	10.5974	4.73422	9.10631e-05	0.00058838	0.385606
222183	SRRM3	7q11.23	0.791303	4.48181	4.73409	9.10935e-05	0.00058838	1.08842
64857	PLEKHG2	19q13.2	0.703204	5.21877	4.73378	9.11621e-05	0.000588447	0.880638
27044	SND1	7q32.1	-0.404244	7.76814	-4.73245	9.14656e-05	0.000590029	0.514082
79718	TBL1XR1	3q26.32	-0.539451	6.38359	-4.73212	9.1539e-05	0.000590126	0.648876
4124	MAN2A1	5q21.3	0.580794	6.79132	4.73146	9.16899e-05	0.000590722	0.625793
83596	BCL2L12	19q13.33	-0.957813	3.53105	-4.73079	9.18439e-05	0.000591337	1.17755
5464	PPA1	10q22.1	-0.440893	7.70187	-4.72987	9.20537e-05	0.00059231	0.514661
56902	PNO1	2p14	-0.663988	5.08251	-4.72859	9.23477e-05	0.000593823	0.922273
7376	NR1H2	19q13.33	0.581772	5.62286	4.72805	9.247e-05	0.000594232	0.78873
23096	IQSEC2	Xp11.22	0.82561	5.19599	4.72756	9.25835e-05	0.000594582	0.939268
8905	AP1S2	Xp22.2	-0.971112	3.99576	-4.72271	9.37053e-05	0.000601404	1.07147
26505	CNNM3	2q11.2	0.454206	6.60578	4.71956	9.44437e-05	0.000605759	0.615557
23102	TBC1D2B	15q24.3-q25.1	0.528034	6.05098	4.71727	9.49828e-05	0.00060883	0.675677
5993	RFX5	1q21.3	0.48266	7.48324	4.71584	9.53199e-05	0.000610604	0.515416
22858	ICK	6p12.1	-0.607457	5.48092	-4.71428	9.56919e-05	0.000612521	0.740546
5985	RFC5	12q24.23	-0.635418	4.90969	-4.71388	9.57854e-05	0.000612521	0.838288
90701	SEC11C	18q21.32	-0.896229	5.36397	-4.71382	9.58012e-05	0.000612521	0.809638
4957	ODF2	9q34.11	-0.504083	6.4295	-4.71332	9.59204e-05	0.000612895	0.598549
59307	SIGIRR	11p15.5	0.751335	5.564	4.7117	9.63068e-05	0.000614976	0.772133
7249	TSC2	16p13.3	0.462995	7.48449	4.71043	9.66121e-05	0.000616535	0.480841
9637	FEZ2	2p22.2	0.604497	5.79168	4.70805	9.71836e-05	0.000619791	0.750009
5250	SLC25A3	12q23.1	-0.350994	9.17945	-4.70736	9.73512e-05	0.000620468	0.372076
51147	ING4	12p13.31	0.568132	5.75186	4.70669	9.75136e-05	0.000621111	0.718293
11100	HNRNPUL1	19q13.2	-0.361381	8.60537	-4.70623	9.76255e-05	0.000621432	0.391083
55848	PLGRKT	9p24.1	0.723605	4.55811	4.70565	9.77649e-05	0.000621928	0.974197
51507	RTF2	20q13.31	0.373906	8.06764	4.70081	9.89505e-05	0.000629074	0.421238
23105	FSTL4	5q31.1	1.83408	2.74094	4.69979	9.92011e-05	0.00063027	1.41672
29946	SERTAD3	19q13.2	0.569516	5.72806	4.69845	9.9531e-05	0.000631969	0.715418
5836	PYGL	14q22.1	0.978889	3.99911	4.69776	9.97034e-05	0.000632666	1.13
81608	FIP1L1	4q12	-0.516146	5.83974	-4.69553	0.000100258	0.000635784	0.659104
3597	IL13RA1	Xq24	0.411642	7.68674	4.69515	0.000100352	0.000635984	0.44492
23313	KIAA0930	22q13.31	0.571326	6.11509	4.69455	0.000100502	0.000636533	0.647808
202333	CMYA5	5q14.1	0.720297	5.05534	4.69321	0.000100837	0.000638255	0.823165
5591	PRKDC	8q11.21	-0.540401	7.71994	-4.69291	0.000100914	0.000638341	0.41655
4665	NAB2	12q13.3	-0.575954	5.89346	-4.69177	0.0001012	0.00063975	0.662122
64710	NUCKS1	1q32.1	-0.499017	9.60919	-4.69045	0.000101533	0.000641429	0.304134
1964	EIF1AX	Xp22.12	-0.52759	6.94672	-4.69006	0.000101631	0.000641429	0.485544
9255	AIMP1	4q24	-0.529441	6.11699	-4.68996	0.000101656	0.000641429	0.605215
55140	ELP3	8p21.1	-0.826208	4.53239	-4.68621	0.000102607	0.000647028	0.909174
4199	ME1	6q14.2	-0.686415	5.37969	-4.68549	0.000102792	0.000647657	0.71494
23061	TBC1D9B	5q35.3	0.410918	8.18235	4.68532	0.000102835	0.000647657	0.374933
84365	NIFK	2q14.3	-0.647905	4.81095	-4.67761	0.000104826	0.000659785	0.835594
79598	CEP97	3q12.3	-0.873785	3.73315	-4.67542	0.000105398	0.000662973	1.01158
5331	PLCB3	11q13.1	0.531192	6.92999	4.6741	0.000105746	0.000664742	0.451373
114294	LACTB	15q22.2	0.987466	4.70597	4.67334	0.000105945	0.000665581	0.989929
81876	RAB1B	11q13.2	0.377991	8.75857	4.67218	0.000106252	0.000667097	0.309801
130814	PQLC3	2p25.1	0.606707	5.91363	4.67101	0.000106562	0.000668629	0.627501
6391	SDHC	1q23.3	0.393641	7.17425	4.66924	0.000107032	0.000671158	0.422143
5007	OSBP	11q12.1	-0.422911	6.46627	-4.66859	0.000107205	0.000671825	0.491634
340526	RTL5	Xq13.1	1.61992	2.75763	4.66826	0.000107292	0.000671956	1.33697
92259	MRPS36	5q13.2	0.753831	4.55762	4.66754	0.000107486	0.000672754	0.908377
7410	VAV2	9q34.2	0.466257	7.09263	4.66694	0.000107647	0.000673342	0.439229
23421	ITGB3BP	1p31.3	-1.20727	3.06811	-4.66557	0.000108014	0.00067522	1.15966
2175	FANCA	16q24.3	-0.856315	4.40455	-4.66281	0.000108756	0.000679439	0.774369
2130	EWSR1	22q12.2	-0.487821	8.21352	-4.65761	0.000110175	0.000687876	0.293885
116988	AGAP3	7q36.1	0.487046	6.54602	4.65592	0.000110637	0.000690335	0.456607
5597	MAPK6	15q21.2	-0.403695	7.59279	-4.65368	0.000111256	0.000693769	0.327039
22824	HSPA4L	4q28.1	-1.07408	4.5291	-4.65048	0.000112145	0.000698882	0.957453
306	ANXA3	4q21.21	0.942853	5.00181	4.64989	0.000112309	0.000699471	0.811952
9766	SUSD6	14q24.1	0.662192	5.46658	4.64523	0.000113618	0.000707193	0.64687
3030	HADHA	2p23.3	-0.386281	8.91557	-4.6435	0.000114109	0.00070981	0.224522
23420	NOMO1	16p13.11	-0.411729	7.69841	-4.6409	0.000114849	0.00071397	0.296904
219927	MRPL21	11q13.3	-0.61228	5.39949	-4.64004	0.000115095	0.000715062	0.583764
55012	PPP2R3C	14q13.2	-0.738298	4.03071	-4.63973	0.000115185	0.000715179	0.8772
4779	NFE2L1	17q21.32	-0.422072	8.228	-4.63917	0.000115346	0.000715595	0.249959
54700	RRN3	16p13.11	-0.445873	6.27107	-4.639	0.000115393	0.000715595	0.445112
283989	TSEN54	17q25.1	0.459026	6.73661	4.63569	0.000116347	0.000721068	0.392337
246243	RNASEH1	2p25.3	-0.635063	5.02238	-4.628	0.000118597	0.000734559	0.652525
122953	JDP2	14q24.3	-0.897506	3.70919	-4.62748	0.000118751	0.000735061	0.886551
230	ALDOC	17q11.2	-0.8401	3.84198	-4.62618	0.000119134	0.000736984	0.908709
79102	RNF26	11q23.3	-0.492744	5.88674	-4.6235	0.000119932	0.000741466	0.445355
4052	LTBP1	2p22.3	0.565484	6.91921	4.62157	0.000120507	0.000744567	0.334894
90102	PHLDB2	3q13.2	0.917936	4.74156	4.621	0.000120679	0.00074517	0.728461
56261	GPCPD1	20p12.3	-0.986353	4.18788	-4.61964	0.00012109	0.000747253	0.826995
10106	CTDSP2	12q14.1	0.391599	8.64536	4.61791	0.000121611	0.000750007	0.171447
57446	NDRG3	20q11.23	0.532898	5.79814	4.61571	0.000122277	0.000753658	0.498907
100188947	HECTD2-AS1	10q23.32	1.60279	2.89115	4.61511	0.00012246	0.000754325	1.15926
1870	E2F2	1p36.12	-1.17112	2.84556	-4.61434	0.000122696	0.00075532	0.967662
255488	RNF144B	6p22.3	0.983807	3.82835	4.61358	0.000122929	0.000756292	0.91281
51406	NOL7	6p23	-0.656452	5.80947	-4.61247	0.000123269	0.000757923	0.457112
7020	TFAP2A	6p24.3	0.608863	5.91058	4.61188	0.000123451	0.00075858	0.466994
9905	SGSM2	17p13.3	0.497875	6.8067	4.61111	0.000123688	0.000759569	0.315214
9129	PRPF3	1q21.2	-0.396989	6.86636	-4.60935	0.00012423	0.000762438	0.291006
51491	NOP16	5q35.2	-0.655708	4.71364	-4.60666	0.000125063	0.000766848	0.681756
1889	ECE1	1p36.12	0.471175	8.09614	4.60654	0.000125101	0.000766848	0.187966
23648	SSBP3	1p32.3	0.607956	5.77996	4.60531	0.000125486	0.000768743	0.46128
9702	CEP57	11q21	-0.820628	4.68342	-4.6033	0.000126114	0.000772122	0.604593
63027	SLC22A23	6p25.2	0.775789	5.21498	4.60249	0.000126369	0.000773218	0.569394
8669	EIF3J	15q21.1	-0.513984	6.10259	-4.60099	0.000126842	0.000775276	0.396777
5140	PDE3B	11p15.2	-1.11038	3.22741	-4.60085	0.000126886	0.000775276	1.00004
3843	IPO5	13q32.2	-0.479486	6.73536	-4.60069	0.000126936	0.000775276	0.282748
8349	HIST2H2BE	1q21.2	0.439466	7.77441	4.60032	0.000127052	0.000775514	0.188819
84627	ZNF469	16q24.2	0.984646	3.83659	4.59838	0.000127668	0.000778806	0.938926
56994	CHPT1	12q23.2	-0.61019	4.92643	-4.59808	0.000127763	0.000778915	0.59077
80164	PRR36	19p13.2	0.946653	4.16113	4.59505	0.00012873	0.000784337	0.850185
1267	CNP	17q21.2	0.711312	4.42328	4.59232	0.000129608	0.000789211	0.695047
125058	TBC1D16	17q25.3	-0.461474	7.10576	-4.59159	0.000129845	0.00079018	0.203379
3191	HNRNPL	19q13.2	0.392709	7.84582	4.58684	0.000131389	0.00079909	0.152545
54463	RETREG1	5p15.1	0.763819	4.6251	4.58472	0.000132082	0.000802412	0.684916
219790	RTKN2	10q21.2	-1.45716	2.07005	-4.58469	0.000132094	0.000802412	1.07197
10287	RGS19	20q13.33	1.01675	4.27356	4.58144	0.000133167	0.000808443	0.813852
9052	GPRC5A	12p13.1	0.773774	5.85904	4.57887	0.00013402	0.000813135	0.447494
63922	CHTF18	16p13.3	-0.799136	5.11192	-4.5744	0.000135521	0.000821749	0.432346
22900	CARD8	19q13.33	-0.750108	3.81287	-4.57172	0.000136426	0.000826738	0.739198
7832	BTG2	1q32.1	0.632077	6.67066	4.57126	0.000136584	0.000827203	0.348018
202915	TMEM184A	7p22.3	0.749274	5.94995	4.56998	0.000137018	0.000829333	0.35674
5422	POLA1	Xp22.11-p21.3	-0.780031	4.91023	-4.56787	0.00013774	0.000833205	0.477734
7846	TUBA1A	12q13.12	0.614415	6.71692	4.56466	0.000138846	0.000839388	0.269492
56886	UGGT1	2q14.3	-0.478144	6.93166	-4.56391	0.000139105	0.000840456	0.174312
167227	DCP2	5q22.2	0.51478	6.84082	4.56358	0.00013922	0.000840643	0.204274
1796	DOK1	2p13.1	-1.10264	3.0459	-4.55859	0.00014096	0.000850645	0.87825
2787	GNG5	1p22.3	0.510778	6.04171	4.55833	0.000141051	0.000850682	0.30645
51435	SCARA3	8p21.1	1.3829	3.33543	4.55723	0.000141438	0.000852335	0.952132
10227	MFSD10	4p16.3	0.521199	6.56061	4.55707	0.000141493	0.000852335	0.199796
55831	EMC3	3p25.3	0.410297	7.45294	4.55615	0.00014182	0.000853793	0.116682
10847	SRCAP	16p11.2	0.49082	7.57082	4.55532	0.000142113	0.000855048	0.0929102
89853	MVB12B	9q33.3	0.831717	4.19858	4.55495	0.000142243	0.00085532	0.679647
9924	PAN2	12q13.3	-0.43748	6.80597	-4.55271	0.000143039	0.000859372	0.141755
3397	ID1	20q11.21	0.939261	3.42586	4.55257	0.000143087	0.000859372	0.82088
5496	PPM1G	2p23.3	0.483846	8.11394	4.5491	0.000144331	0.000866329	0.0545294
6184	RPN1	3q21.3	-0.350266	8.66228	-4.54585	0.000145504	0.00087285	-0.00239026
94134	ARHGAP12	10p11.22	0.506386	6.61727	4.54443	0.000146019	0.000875422	0.188828
25829	TMEM184B	22q13.1	0.5719	6.18912	4.54163	0.000147038	0.000881005	0.239557
57221	ARFGEF3	6q23.3-q24.1	0.54892	8.02918	4.54077	0.000147354	0.000882378	0.0188848
154796	AMOT	Xq23	1.14094	3.91345	4.53562	0.000149257	0.000893243	0.748847
4189	DNAJB9	7q31.1	-0.783119	4.23094	-4.53466	0.000149614	0.000894852	0.588675
50804	MYEF2	15q21.1	-0.584223	5.49556	-4.53432	0.000149741	0.00089508	0.318563
8976	WASL	7q31.32	0.596165	6.26267	4.53313	0.000150183	0.000897191	0.224457
50488	MINK1	17p13.2	0.462252	6.4136	4.53176	0.000150699	0.000899743	0.186675
54517	PUS7	7q22.3	-0.723193	4.68653	-4.53088	0.000151027	0.000900796	0.491118
125170	MIEF2	17p11.2	1.03058	3.9836	4.53081	0.000151054	0.000900796	0.726976
9733	SART3	12q23.3	-0.450602	6.53117	-4.52877	0.000151824	0.000903903	0.13496
642273	FAM110C	2p25.3	0.597181	5.59536	4.52874	0.000151836	0.000903903	0.324933
4841	NONO	Xq13.1	-0.33817	9.37495	-4.52872	0.000151843	0.000903903	-0.0851496
2181	ACSL3	2q36.1	0.425648	7.68018	4.52378	0.000153722	0.000914546	0.0073879
64770	CCDC14	3q21.1	-0.541008	5.46309	-4.52275	0.000154115	0.000916343	0.308886
23231	SEL1L3	4p15.2	-0.656285	5.61234	-4.52196	0.000154419	0.000917103	0.266396
2355	FOSL2	2p23.2	-0.553753	6.08673	-4.52195	0.000154424	0.000917103	0.213451
11037	STON1	2p16.3	2.19044	2.31305	4.51997	0.000155187	0.000921095	0.997634
107	ADCY1	7p12.3	-0.692715	6.00598	-4.51949	0.000155371	0.000921644	0.245026
5424	POLD1	19q13.33	-0.792756	4.24151	-4.51863	0.000155705	0.000923083	0.445913
64168	NECAB1	8q21.3	-1.04136	4.27639	-4.51827	0.000155846	0.000923376	0.691947
38	ACAT1	11q22.3	0.550218	5.78158	4.51735	0.000156204	0.000924958	0.261203
11198	SUPT16H	14q11.2	-0.427157	7.80882	-4.5142	0.000157433	0.000931688	-0.0355113
8202	NCOA3	20q13.12	0.371274	12.0949	4.5109	0.000158733	0.000938827	-0.248522
4774	NFIA	1p31.3	-0.836987	4.14401	-4.50872	0.000159597	0.000943385	0.517078
55333	SYNJ2BP	14q24.2	0.521661	6.1526	4.50773	0.00015999	0.000944842	0.169252
4077	NBR1	17q21.31	0.376302	7.56978	4.50763	0.00016003	0.000944842	-0.0279184
8440	NCK2	2q12.2	0.615733	4.96108	4.50728	0.00016017	0.000945114	0.406814
5184	PEPD	19q13.11	1.28903	3.36968	4.50668	0.000160409	0.000945973	0.825803
4931	NVL	1q42.11	-0.602495	5.47516	-4.50609	0.000160642	0.000946795	0.257692
23057	NMNAT2	1q25.3	1.24248	3.11987	4.50455	0.00016126	0.000949883	0.905607
10425	ARIH2	3p21.31	-0.478387	6.03536	-4.5035	0.000161682	0.000951319	0.149397
5202	PFDN2	1q23.3	-0.68793	4.75644	-4.50348	0.000161692	0.000951319	0.3963
427	ASAH1	8p22	0.525576	7.87089	4.49961	0.000163257	0.000959964	-0.0550046
51074	APIP	11p13	-0.660597	4.88799	-4.49916	0.00016344	0.000960481	0.332576
342371	ATXN1L	16q22.2	0.455304	7.13219	4.49822	0.000163825	0.000961684	-0.00193769
79838	TMC5	16p12.3	1.79984	2.44384	4.49819	0.000163835	0.000961684	0.898995
79654	HECTD3	1p34.1	0.622023	5.26257	4.49632	0.000164599	0.000965574	0.321255
3613	IMPA2	18p11.21	-0.542704	5.42051	-4.4961	0.000164688	0.000965574	0.190982
10381	TUBB3	16q24.3	0.75156	5.43198	4.4957	0.000164854	0.000965983	0.348504
84549	MAK16	8p12	-1.11604	3.57001	-4.49543	0.000164967	0.000966086	0.713194
10075	HUWE1	Xp11.22	0.450349	9.37294	4.49453	0.000165338	0.000967694	-0.161126
9341	VAMP3	1p36.23	0.508641	6.08151	4.49351	0.000165757	0.000969585	0.152109
4357	MPST	22q12.3	-0.751026	4.95007	-4.49178	0.00016647	0.000973195	0.321662
54776	PPP1R12C	19q13.42	0.602692	5.93038	4.4897	0.000167338	0.000977329	0.164585
57659	ZBTB4	17p13.1	0.646282	6.27344	4.48962	0.000167371	0.000977329	0.118451
64743	WDR13	Xp11.23	0.57831	5.55916	4.48936	0.000167476	0.000977329	0.232934
3475	IFRD1	7q31.1	-0.902819	3.76514	-4.48915	0.000167564	0.000977329	0.567959
79026	AHNAK	11q12.3	0.440696	11.0527	4.48878	0.00016772	0.000977673	-0.25209
84168	ANTXR1	2p13.3	0.496323	5.75492	4.48854	0.000167819	0.000977688	0.162333
9631	NUP155	5p13.2	-0.638291	5.33063	-4.48757	0.000168227	0.000979497	0.199689
84924	ZNF566	19q13.12	-1.09981	2.80053	-4.4858	0.000168969	0.000983029	0.747749
55342	STRBP	9q33.3	-0.435665	6.65503	-4.48566	0.000169028	0.000983029	0.0270027
3956	LGALS1	22q13.1	-1.04669	3.09741	-4.48185	0.000170641	0.00099184	0.593207
150465	TTL	2q14.1	-0.608828	5.25788	-4.48103	0.000170987	0.000993278	0.259666
5784	PTPN14	1q32.3-q41	0.931015	4.07485	4.47936	0.000171702	0.000996857	0.528891
5507	PPP1R3C	10q23.32	0.616806	6.13921	4.47839	0.000172115	0.000998683	0.0851423
56927	GPR108	19p13.3	0.529348	5.60018	4.47653	0.000172914	0.00100274	0.174983
4615	MYD88	3p22.2	0.593861	5.28063	4.4742	0.000173921	0.001008	0.236162
56204	FAM214A	15q21.2-q21.3	0.501999	6.90363	4.46954	0.00017595	0.00101918	-0.0301654
2034	EPAS1	2p21	0.921469	4.50112	4.46887	0.000176247	0.00102031	0.494934
55186	SLC25A36	3q23	-0.438463	6.71136	-4.46811	0.000176578	0.00102164	-0.0578056
2589	GALNT1	18q12.2	0.400601	7.24072	4.46331	0.000178704	0.00103335	-0.0963113
10096	ACTR3	2q14.1	-0.414803	7.42819	-4.4619	0.00017933	0.00103638	-0.135221
22839	DLGAP4	20q11.23	0.4791	6.39689	4.46132	0.000179588	0.00103728	0.0127619
117583	PARD3B	2q33.3	0.94806	4.21654	4.46069	0.000179874	0.00103833	0.474651
7517	XRCC3	14q32.33	-1.11555	3.13025	-4.4588	0.00018072	0.00104262	0.638513
533	ATP6V0B	1p34.1	0.537351	6.72787	4.45844	0.000180885	0.00104298	-0.0250324
7965	AIMP2	7p22.1	-0.995537	3.79051	-4.45779	0.000181175	0.00104378	0.53683
57211	ADGRG6	6q24.2	-0.670138	6.55001	-4.45767	0.00018123	0.00104378	-0.040702
153222	CREBRF	5q35.1	0.992097	4.28359	4.45552	0.000182202	0.00104878	0.436818
10121	ACTR1A	10q24.32	0.503439	6.02676	4.45324	0.00018324	0.00105415	0.0811029
56852	RAD18	3p25.3	-0.773294	4.52332	-4.45257	0.000183546	0.00105531	0.302745
60559	SPCS3	4q34.2	-0.507556	6.92496	-4.44958	0.00018492	0.00106261	-0.0975088
6418	SET	9q34.11	-0.400106	9.10854	-4.4489	0.000185234	0.00106336	-0.26406
5471	PPAT	4q12	-0.649526	5.33854	-4.44883	0.000185262	0.00106336	0.142832
23256	SCFD1	14q12	-0.601095	5.61903	-4.44597	0.000186588	0.00107037	0.0857544
27301	APEX2	Xp11.21	0.58895	6.02806	4.44248	0.000188216	0.00107909	0.0176017
79866	BORA	13q21.33	-1.41623	2.32972	-4.44177	0.000188548	0.00108038	0.720217
7126	TNFAIP1	17q11.2	0.499716	6.07757	4.43995	0.000189408	0.00108469	0.0123423
1719	DHFR	5q14.1	-0.714392	5.44795	-4.43602	0.000191268	0.0010938	0.0409623
6728	SRP19	5q22.2	-0.502259	5.60292	-4.43602	0.000191271	0.0010938	0.0723993
9489	PGS1	17q25.3	0.638789	5.19867	4.43591	0.000191322	0.0010938	0.160238
55131	RBM28	7q32.1	-0.776409	4.35152	-4.43124	0.000193558	0.00110595	0.305815
10400	PEMT	17p11.2	-0.886038	3.33796	-4.43028	0.000194025	0.001108	0.498197
10419	PRMT5	14q11.2	-0.495628	5.91289	-4.42953	0.000194386	0.00110943	-0.0162787
55449	DHRS4-AS1	14q11.2	-0.678092	5.22757	-4.42897	0.000194657	0.00111035	0.0928086
1545	CYP1B1	2p22.2	-1.08877	3.5282	-4.42429	0.00019694	0.00112274	0.506187
29984	RHOD	11q13.2	0.602102	6.24695	4.42285	0.000197646	0.00112613	-0.0299891
51347	TAOK3	12q24.23	0.551386	6.26821	4.42232	0.000197906	0.00112697	-0.0873813
347	APOD	3q29	2.15814	2.64662	4.42165	0.000198237	0.00112822	0.783149
79968	WDR76	15q15.3	-1.35692	1.59882	-4.42091	0.000198605	0.00112968	0.656052
27202	C5AR2	19q13.32	-2.41711	1.47136	-4.42066	0.000198728	0.00112974	0.772549
9818	NUP58	13q12.13	-0.617128	5.38348	-4.4187	0.000199702	0.00113464	0.0326848
4232	MEST	7q32.2	-0.590093	5.73346	-4.41776	0.000200171	0.00113666	-0.00292494
4758	NEU1	6p21.33	0.439001	7.31387	4.41604	0.000201029	0.00114051	-0.222066
80024	SLC8B1	12q24.13	0.88324	3.74341	4.41595	0.000201074	0.00114051	0.484313
100506753	AZIN1-AS1	8q22.3	-1.24355	2.5306	-4.41144	0.000203346	0.00115275	0.648355
284129	SLC26A11	17q25.3	0.719445	4.77499	4.41033	0.000203906	0.00115528	0.21984
9807	IP6K1	3p21.31	0.601325	5.4058	4.40593	0.000206153	0.00116735	0.0464792
4215	MAP3K3	17q23.3	0.456842	5.9935	4.40561	0.000206316	0.00116762	-0.0747401
126382	NR2C2AP	19p13.11	-0.7358	4.31548	-4.40471	0.000206783	0.00116961	0.260147
23585	TMEM50A	1p36.11	0.501147	5.57609	4.40434	0.000206971	0.00117002	-0.00392034
84864	RIOX2	3q11.2	-0.635909	4.80652	-4.40325	0.000207532	0.00117253	0.149263
64431	ACTR6	12q23.1	-0.502179	5.43161	-4.4028	0.000207765	0.00117319	-0.00410047
55038	CDCA4	14q32.33	-0.683051	4.3846	-4.40224	0.000208056	0.00117418	0.185878
645	BLVRB	19q13.2	-0.454366	6.81027	-4.40197	0.000208196	0.00117432	-0.239949
5590	PRKCZ	1p36.33	0.685452	4.95769	4.40095	0.000208728	0.00117666	0.153356
10519	CIB1	15q26.1	0.464116	6.75338	4.39994	0.000209251	0.00117895	-0.18378
54962	TIPIN	15q22.31	-1.09046	3.07648	-4.39813	0.000210195	0.0011836	0.462159
221504	ZBTB9	6p21.32	0.664196	5.03269	4.39762	0.000210462	0.00118445	0.146608
56652	TWNK	10q24.31	-0.855301	4.28537	-4.39656	0.000211022	0.00118694	0.243259
9895	TECPR2	14q32.31	0.622182	4.72357	4.39508	0.000211799	0.00119033	0.19082
64969	MRPS5	2q11.1	-0.494841	5.92126	-4.39497	0.00021186	0.00119033	-0.109386
54849	DEF8	16q24.3	0.572261	6.30828	4.39427	0.000212225	0.00119172	-0.125407
8263	F8A1	Xq28	0.692653	4.84109	4.39338	0.000212696	0.0011937	0.182866
5874	RAB27B	18q21.2	0.912706	6.85207	4.3914	0.000213748	0.00119893	-0.218554
6228	RPS23	5q14.2	-0.380585	9.44096	-4.39061	0.000214171	0.00120064	-0.424927
55033	FKBP14	7p14.3	-1.00017	3.08654	-4.39006	0.000214465	0.00120162	0.49456
6932	TCF7	5q31.1	2.91866	1.89297	4.38975	0.000214629	0.00120188	0.701711
54955	C1orf109	1p34.3	-0.689387	4.4935	-4.3892	0.000214926	0.00120287	0.206803
7494	XBP1	22q12.1	-0.521613	11.1254	-4.3889	0.000215085	0.0012031	-0.496494
29767	TMOD2	15q21.2	1.05475	3.99458	4.38793	0.000215607	0.00120535	0.44547
5436	POLR2G	11q12.3	-0.428811	7.06224	-4.38382	0.000217821	0.00121705	-0.296389
2176	FANCC	9q22.32	-0.890038	3.76495	-4.38354	0.000217977	0.00121725	0.290451
55787	TXLNG	Xp22.2	-0.449315	6.15981	-4.38331	0.000218101	0.00121727	-0.167471
84925	DIRC2	3q21.1	0.719663	4.4388	4.38308	0.000218226	0.00121729	0.240061
96764	TGS1	8q12.1	-0.732813	4.27089	-4.38262	0.000218474	0.00121801	0.191459
11247	NXPH4	12q13.3	-0.919596	3.66579	-4.38169	0.000218983	0.00121996	0.302589
10551	AGR2	7p21.1	-1.50768	5.94919	-4.38139	0.000219147	0.00121996	-0.0556734
63951	DMRTA1	9p21.3	1.27617	2.76281	4.38115	0.000219274	0.00121996	0.558943
57717	PCDHB16	5q31.3	-1.13263	3.49031	-4.38109	0.000219307	0.00121996	0.453992
10459	MAD2L2	1p36.22	-0.777071	4.14965	-4.38085	0.000219442	0.00122003	0.235392
5429	POLH	6p21.1	-0.709709	5.29491	-4.38042	0.000219673	0.00122065	0.0710613
84629	TNRC18	7p22.1	0.404788	8.25607	4.37942	0.000220221	0.00122302	-0.39977
27250	PDCD4	10q25.2	-0.546112	6.78435	-4.37752	0.000221265	0.00122814	-0.238641
92799	SHKBP1	19q13.2	0.529527	5.89859	4.37703	0.00022154	0.00122899	-0.121922
54741	LEPROT	1p31.3	0.525441	6.34533	4.37549	0.000222387	0.00123247	-0.168837
51388	NIP7	16q22.1	-0.571667	5.7703	-4.37539	0.000222444	0.00123247	-0.0999223
9266	CYTH2	19q13.33	0.44246	6.93473	4.37505	0.000222631	0.00123247	-0.286026
54814	QPCTL	19q13.32	-0.666978	4.28874	-4.37489	0.00022272	0.00123247	0.126582
121642	ALKBH2	12q24.11	-0.771045	3.99865	-4.37479	0.000222777	0.00123247	0.237962
10134	BCAP31	Xq28	0.400433	8.6962	4.37444	0.000222972	0.0012328	-0.418401
53340	SPA17	11q24.2	-1.42999	2.93457	-4.37417	0.00022312	0.0012328	0.55575
6218	RPS17	15q25.2	-0.421785	10.1085	-4.37402	0.000223202	0.0012328	-0.496522
1663	DDX11	12p11.21	-0.746336	4.7424	-4.36973	0.0002256	0.00124536	0.0264108
8872	CDC123	10p14-p13	-0.433748	6.5225	-4.36925	0.000225874	0.00124619	-0.251105
285855	RPL7L1	6p21.1	-0.359432	8.33097	-4.36831	0.000226401	0.00124842	-0.424116
26999	CYFIP2	5q33.3	0.629572	6.05058	4.36594	0.000227739	0.00125511	-0.104093
55588	MED29	19q13.2	0.449563	6.49338	4.36506	0.000228239	0.00125718	-0.242025
80148	PQLC1	18q23	0.748756	4.33279	4.36472	0.000228432	0.00125756	0.191472
55108	BSDC1	1p35.1	0.424749	7.05497	4.36416	0.000228752	0.00125863	-0.321848
53981	CPSF2	14q32.12	-0.524643	6.18644	-4.3639	0.000228903	0.00125878	-0.219845
6533	SLC6A6	3p25.1	0.464917	7.07154	4.36355	0.000229101	0.00125918	-0.314531
2794	GNL1	6p21.33	-0.495614	6.24503	-4.36252	0.000229687	0.00126172	-0.243827
64063	PRSS22	16p13.3	0.792642	5.40722	4.35787	0.000232362	0.00127572	-0.0524552
8767	RIPK2	8q21.3	-0.594562	5.6919	-4.35655	0.000233131	0.00127856	-0.147037
10243	GPHN	14q23.3-q24.1	-0.7188	4.67792	-4.35637	0.000233231	0.00127856	0.0665097
8877	SPHK1	17q25.1	1.1245	3.80315	4.35625	0.000233303	0.00127856	0.413352
10807	SDCCAG3	9q34.3	-0.547571	5.29425	-4.35611	0.000233386	0.00127856	-0.0653713
4041	LRP5	11q13.2	0.466487	6.92118	4.3553	0.000233857	0.00128044	-0.34643
57701	NCKAP5L	12q13.12	0.970572	4.78018	4.35481	0.00023414	0.0012813	0.0955426
80218	NAA50	3q13.31	-0.410682	7.4435	-4.35385	0.000234703	0.00128369	-0.397267
6132	RPL8	8q24.3	-0.342062	10.5203	-4.35338	0.000234977	0.00128449	-0.569195
375790	AGRN	1p36.33	0.557818	8.73154	4.35222	0.000235656	0.0012875	-0.483639
80031	SEMA6D	15q21.1	1.59288	2.75624	4.35042	0.000236716	0.0012926	0.528041
26056	RAB11FIP5	2p13.2	0.98032	3.76671	4.34797	0.000238165	0.00129981	0.347234
57610	RANBP10	16q22.1	0.436637	6.35377	4.34707	0.000238698	0.00130201	-0.279374
8019	BRD3	9q34.2	0.471058	5.92019	4.3465	0.000239039	0.00130317	-0.212932
83481	EPPK1	8q24.3	0.802334	5.99547	4.34461	0.000240167	0.00130861	-0.190159
115704	EVI5L	19p13.2	0.816011	4.73163	4.34373	0.00024069	0.00131076	0.0238759
10286	BCAS2	1p13.2	-0.404694	8.28041	-4.34347	0.000240849	0.00131092	-0.485785
2547	XRCC6	22q13.2	-0.369188	8.9032	-4.34292	0.000241179	0.001312	-0.51939
3625	INHBB	2q14.2	0.532837	6.22455	4.33987	0.000243016	0.00132129	-0.255749
54920	DUS2	16q22.1	-0.565785	5.12372	-4.33864	0.000243759	0.00132461	-0.0919457
57134	MAN1C1	1p36.11	0.930077	4.05823	4.33826	0.000243993	0.00132517	0.235245
1636	ACE	17q23.3	1.29011	3.81592	4.33766	0.000244356	0.00132643	0.286288
113230	MISP3	19p13.12	0.902022	4.20872	4.33723	0.00024462	0.00132715	0.174869
23015	GOLGA8A	15q14	0.870776	4.52599	4.3355	0.000245675	0.00133216	0.121749
84102	SLC41A2	12q23.3	1.05391	3.70068	4.33476	0.000246127	0.00133389	0.325092
6136	RPL12	9q33.3	-0.403472	9.99899	-4.33384	0.000246694	0.00133625	-0.591461
1027	CDKN1B	12p13.1	-0.533656	5.99253	-4.33264	0.000247432	0.00133953	-0.29819
162989	DEDD2	19q13.2	0.646256	4.52762	4.33238	0.000247593	0.00133968	0.0455714
84162	KIAA1109	4q27	0.496151	6.94284	4.33175	0.000247979	0.00134105	-0.386111
10947	AP3M2	8p11.21	-0.68939	4.43273	-4.33058	0.000248704	0.00134425	0.0457254
5441	POLR2L	11p15.5	0.622097	5.964	4.32995	0.000249095	0.00134564	-0.214257
3975	LHX1	17q12	0.835887	5.03227	4.32951	0.000249364	0.00134638	-0.0457515
79977	GRHL2	8q22.3	-0.483502	7.28679	-4.32846	0.000250018	0.00134919	-0.448219
57129	MRPL47	3q26.33	-0.623211	5.51279	-4.32797	0.000250324	0.00135012	-0.1931
10669	CGREF1	2p23.3	-0.714733	5.19087	-4.32718	0.000250819	0.00135207	-0.11368
64834	ELOVL1	1p34.2	0.461319	6.27176	4.32677	0.000251075	0.00135272	-0.291078
80728	ARHGAP39	8q24.3	0.681083	5.11455	4.32622	0.00025142	0.00135386	-0.116798
3911	LAMA5	20q13.33	0.550186	8.02458	4.3249	0.000252243	0.00135757	-0.519702
79065	ATG9A	2q35	0.478874	6.39179	4.32415	0.000252715	0.00135886	-0.329752
79643	CHMP6	17q25.3	0.628484	4.6878	4.32409	0.000252752	0.00135886	0.0211649
7866	IFRD2	3p21.31	-0.865858	4.16245	-4.32344	0.000253162	0.00136034	0.0788919
54800	KLHL24	3q27.1	0.629237	5.57914	4.32295	0.000253474	0.00136129	-0.199454
220988	HNRNPA3	2q31.2	-0.400523	8.53156	-4.32091	0.000254764	0.0013675	-0.550565
6990	DYNLT3	Xp11.4	-0.749041	5.20122	-4.31722	0.000257115	0.00137938	-0.0508842
9592	IER2	19p13.13	0.645105	6.56939	4.31675	0.000257416	0.00138026	-0.358843
57192	MCOLN1	19p13.2	1.40487	2.87149	4.31573	0.000258069	0.00138303	0.439824
442075	EMC3-AS1	3p25.3	-1.21691	2.55748	-4.31549	0.000258221	0.00138303	0.350024
22978	NT5C2	10q24.32-q24.33	-0.506746	6.32212	-4.3151	0.000258477	0.00138303	-0.338055
29088	MRPL15	8q11.23	-0.569033	5.33122	-4.31498	0.00025855	0.00138303	-0.188167
10189	ALYREF	17q25.3	-0.513715	5.57834	-4.31488	0.000258617	0.00138303	-0.249642
6390	SDHB	1p36.13	-0.424953	6.41364	-4.31204	0.000260454	0.00139212	-0.383187
7852	CXCR4	2q22.1	1.23988	5.68656	4.31113	0.000261045	0.00139454	-0.179703
9467	SH3BP5	3p25.1	0.565623	5.71157	4.30701	0.000263731	0.00140815	-0.236388
2195	FAT1	4q35.2	0.62345	6.69724	4.3047	0.000265252	0.00141517	-0.38304
10109	ARPC2	2q35	0.377153	7.88059	4.30459	0.000265327	0.00141517	-0.536971
79837	PIP4K2C	12q13.3	0.411594	6.77923	4.30253	0.000266689	0.00142169	-0.410348
55074	OXR1	8q23.1	-0.56125	6.08042	-4.29876	0.000269207	0.0014339	-0.361511
1822	ATN1	12p13.31	0.455757	7.4525	4.29867	0.000269264	0.0014339	-0.538777
55040	EPN3	17q21.33	0.451577	6.44398	4.2957	0.000271266	0.0014438	-0.422661
5935	RBM3	Xp11.23	-0.388271	8.12851	-4.29534	0.000271508	0.00144433	-0.599641
8751	ADAM15	1q21.3	-0.434324	7.45861	-4.29335	0.000272858	0.00145074	-0.562075
90780	PYGO2	1q21.3	0.37939	6.8236	4.29056	0.000274759	0.00146008	-0.479054
57156	TMEM63C	14q24.3	0.821521	4.57358	4.28825	0.000276343	0.00146773	-0.0605796
30	ACAA1	3p22.2	0.497083	6.34441	4.28732	0.000276984	0.00147036	-0.394035
5481	PPID	4q32.1	-0.561011	5.28317	-4.28703	0.000277182	0.00147064	-0.240961
3159	HMGA1	6p21.31	-0.397537	7.45096	-4.28437	0.000279024	0.00147963	-0.585782
378938	MALAT1	11q13.1	0.637054	9.114	4.28392	0.000279335	0.00148051	-0.647258
64764	CREB3L2	7q33	-0.500551	7.12548	-4.2818	0.000280819	0.00148713	-0.559851
126308	MOB3A	19p13.3	0.617332	4.69592	4.28171	0.00028088	0.00148713	-0.10718
64207	IRF2BPL	14q24.3	0.547042	6.59268	4.27962	0.000282344	0.00149383	-0.47986
9988	DMTF1	7q21.12	-0.487235	5.66673	-4.27937	0.000282516	0.00149383	-0.346438
387521	TMEM189	20q13.13	0.486617	6.58215	4.27927	0.000282589	0.00149383	-0.460141
4121	MAN1A1	6q22.31	-0.603233	4.69977	-4.27886	0.000282875	0.00149413	-0.142261
8882	ZPR1	11q23.3	-0.542069	5.55069	-4.27877	0.000282941	0.00149413	-0.306128
64434	NOM1	7q36.3	-0.642828	4.71526	-4.27643	0.000284597	0.00150137	-0.111166
8208	CHAF1B	21q22.12-q22.13	-0.762655	4.22994	-4.27641	0.00028461	0.00150137	-0.0898708
440456	PLEKHM1P1	17q24.1	0.804377	4.42418	4.27593	0.000284946	0.00150236	-0.0922853
9842	PLEKHM1	17q21.31	0.852296	3.84089	4.27557	0.000285205	0.00150294	0.108891
10908	PNPLA6	19p13.2	0.644176	5.03815	4.27496	0.000285635	0.00150442	-0.219152
7798	LUZP1	1p36.12	0.663334	5.34476	4.27369	0.000286542	0.00150841	-0.233631
158158	RASEF	9q21.32	0.52215	6.52986	4.27346	0.000286709	0.00150851	-0.469573
130367	SGPP2	2q36.1	1.56563	2.41069	4.27278	0.000287189	0.00151025	0.399283
9278	ZBTB22	6p21.32	0.544304	5.20534	4.27188	0.000287834	0.00151285	-0.257444
2907	GRINA	8q24.3	0.407811	8.62758	4.2702	0.000289039	0.0015184	-0.679972
84002	B3GNT5	3q27.1	-0.873375	3.2782	-4.26863	0.000290172	0.0015228	0.0174023
11264	PXMP4	20q11.22	0.918871	3.90206	4.26862	0.000290179	0.0015228	0.11168
10174	SORBS3	8p21.3	0.558187	5.30881	4.26807	0.000290579	0.00152411	-0.302302
10499	NCOA2	8q13.3	0.473075	6.18988	4.26662	0.000291627	0.00152813	-0.45322
8575	PRKRA	2q31.2	-0.549663	4.87558	-4.26659	0.000291648	0.00152813	-0.202508
162073	ITPRIPL2	16p12.3	0.762684	5.31458	4.26498	0.000292819	0.0015326	-0.354021
8761	PABPC4	1p34.3	-0.367109	7.27708	-4.26497	0.000292827	0.0015326	-0.609479
23354	HAUS5	19q13.12	-0.725411	3.8965	-4.2648	0.000292957	0.0015326	-0.0569916
222166	MTURN	7p14.3	0.809129	4.1315	4.26434	0.000293286	0.00153353	0.00277581
51068	NMD3	3q26.1	-0.668037	8.03325	-4.26081	0.000295877	0.00154627	-0.675582
282809	POC1B	12q21.33	-0.726111	4.72092	-4.2606	0.000296029	0.00154627	-0.195776
90990	KIFC2	8q24.3	1.0733	6.65013	4.26026	0.000296285	0.00154681	-0.484516
10347	ABCA7	19p13.3	0.923464	4.15797	4.25942	0.000296904	0.00154924	0.00830539
55299	BRIX1	5p13.2	-0.588002	5.1206	-4.25816	0.000297836	0.0015533	-0.270721
92140	MTDH	8q22.1	-0.423776	7.86789	-4.25744	0.000298371	0.00155528	-0.679901
203197	TMEM268	9q32	-0.535834	5.44884	-4.25581	0.000299585	0.00156081	-0.393239
54619	CCNJ	10q24.1	-0.916443	3.86599	-4.25368	0.000301172	0.00156827	0.0196989
55061	SUSD4	1q41	-0.662018	4.79621	-4.25311	0.0003016	0.00156969	-0.15754
9813	EFCAB14	1p33	0.390375	7.69902	4.25213	0.000302338	0.00157272	-0.667674
7402	UTRN	6q24.2	0.599885	6.3584	4.25042	0.000303628	0.00157862	-0.510865
3280	HES1	3q29	0.621051	6.96476	4.24624	0.000306804	0.00159431	-0.568127
64222	TOR3A	1q25.2	-0.460533	6.33096	-4.24522	0.000307583	0.00159753	-0.530299
9728	SECISBP2L	15q21.1	0.523258	5.85988	4.24169	0.000310297	0.0016108	-0.428729
51012	PRELID3B	20q13.32	-0.534583	7.1156	-4.24124	0.000310642	0.00161177	-0.644402
64149	C17orf75	17q11.2	-0.727417	3.98934	-4.24008	0.000311544	0.00161555	-0.0747108
80162	PGGHG	11p15.5	0.819547	4.22315	4.23989	0.000311692	0.00161555	-0.0382201
23518	R3HDM1	2q21.3	-0.472103	5.91057	-4.23923	0.000312202	0.00161723	-0.474873
65264	UBE2Z	17q21.32	0.349661	8.00821	4.23906	0.000312336	0.00161723	-0.720871
51021	MRPS16	10q22.2	-0.414045	6.69407	-4.23817	0.000313024	0.00161997	-0.592918
284613	CYB561D1	1p13.3	0.521491	5.80319	4.23641	0.000314403	0.00162627	-0.425601
23218	NBEAL2	3p21.31	0.588358	7.4695	4.2349	0.000315584	0.00163154	-0.696931
100288152	SLC9A3-AS1	5p15.33	1.17614	4.47051	4.23374	0.000316497	0.00163542	-0.126263
374393	FAM111B	11q12.1	-1.22598	2.29941	-4.23228	0.000317646	0.00164052	0.127555
26503	SLC17A5	6q13	0.783783	4.69776	4.23073	0.000318878	0.00164604	-0.164366
23623	RUSC1	1q22	0.463219	6.44614	4.22855	0.00032061	0.00165414	-0.589048
23214	XPO6	16p12.1	-0.417481	6.86433	-4.22761	0.000321358	0.00165715	-0.654491
79659	DYNC2H1	11q22.3	0.703535	4.71669	4.22668	0.000322101	0.00166014	-0.235033
191	AHCY	20q11.22	-0.392095	8.26749	-4.22647	0.000322277	0.00166019	-0.776969
5604	MAP2K1	15q22.31	0.506203	5.71947	4.21829	0.0003289	0.00169345	-0.497167
85365	ALG2	9q22.33	-0.471426	5.73009	-4.21572	0.000331009	0.00170344	-0.495573
5216	PFN1	17p13.2	0.351823	8.62633	4.21434	0.000332144	0.00170841	-0.818843
54585	LZTFL1	3p21.31	-0.767415	4.39682	-4.21351	0.000332837	0.00171111	-0.217559
2119	ETV5	3q27.2	-1.21327	2.67589	-4.21317	0.000333117	0.00171167	0.161424
10952	SEC61B	9q22.33	-0.456457	6.38234	-4.20896	0.000336622	0.0017288	-0.615868
158219	TTC39B	9p22.3	0.7658	4.14359	4.20818	0.000337273	0.00173127	-0.168381
6051	RNPEP	1q32.1	-0.429279	6.61331	-4.20797	0.000337451	0.0017313	-0.653367
6484	ST3GAL4	11q24.2	0.627123	5.46655	4.20745	0.000337893	0.00173269	-0.433541
24145	PANX1	11q21	-0.555446	5.02498	-4.20644	0.000338741	0.00173615	-0.391195
84260	TCHP	12q24.11	-0.526785	4.98619	-4.20541	0.000339606	0.0017392	-0.40612
22933	SIRT2	19q13.2	0.589887	4.88601	4.20533	0.000339679	0.0017392	-0.392704
79443	FYCO1	3p21.31	0.471248	6.00348	4.2028	0.000341823	0.00174929	-0.558203
2549	GAB1	4q31.21	0.664056	5.44749	4.2018	0.000342674	0.00175276	-0.459523
90864	SPSB3	16p13.3	0.555721	6.11405	4.2008	0.000343527	0.00175623	-0.594379
146439	BICDL2	16p13.3	0.689694	6.05562	4.19975	0.000344426	0.00175994	-0.57647
115294	PCMTD1	8q11.23	0.555894	5.54537	4.1992	0.000344893	0.00176143	-0.481705
7408	VASP	19q13.32	0.444255	7.26823	4.19736	0.000346482	0.00176865	-0.764293
11059	WWP1	8q21.3	0.361623	7.647	4.1926	0.000350602	0.00178878	-0.799478
25804	LSM4	19p13.11	-0.483983	5.93772	-4.19152	0.000351549	0.00179271	-0.604641
8099	CDK2AP1	12q24.31	0.464619	5.93109	4.1911	0.000351911	0.00179365	-0.570459
23076	RRP1B	21q22.3	-0.479765	6.38015	-4.19048	0.000352459	0.00179553	-0.68462
2584	GALK1	17q25.1	0.607079	5.10156	4.18991	0.000352956	0.00179716	-0.410879
466	ATF1	12q13.12	-0.446112	5.66892	-4.18949	0.000353326	0.00179814	-0.578471
79966	SCD5	4q21.22	0.59667	6.01262	4.1851	0.000357203	0.00181695	-0.561495
124222	PAQR4	16p13.3	-0.567719	4.87623	-4.18282	0.000359241	0.0018264	-0.465859
8985	PLOD3	7q22.1	-0.627714	6.0759	-4.18249	0.00035953	0.00182695	-0.661899
3421	IDH3G	Xq28	0.424444	6.707	4.17903	0.000362639	0.00184182	-0.737749
79572	ATP13A3	3q29	-0.396472	7.2526	-4.17679	0.00036466	0.00185115	-0.831638
51363	CHST15	10q26.13	0.372939	6.85914	4.17472	0.000366543	0.00185978	-0.775699
64856	VWA1	1p36.33	0.793129	4.87428	4.1745	0.000366747	0.00185988	-0.386473
10325	RRAGB	Xp11.21	0.683333	4.31633	4.17384	0.000367349	0.001862	-0.267049
79666	PLEKHF2	8q22.1	0.587301	7.85373	4.16983	0.000371028	0.0018797	-0.88065
9662	CEP135	4q12	-0.724944	4.26654	-4.16924	0.000371573	0.00188152	-0.319578
182	JAG1	20p12.2	0.704979	4.92775	4.1683	0.00037245	0.00188501	-0.38402
51526	OSER1	20q13.12	0.484929	6.24603	4.16785	0.000372865	0.00188617	-0.691854
1312	COMT	22q11.21	0.491053	6.58545	4.16714	0.000373524	0.00188856	-0.762439
[truncated: 8,104 more rows]

## Sheet: Table S3. Combination
Table S3: Differential expression analysis of MCF7 cell lines following 48 hours treatment with combination therapy (NVP-CGM097 + fulvestrant) versus vehicle (0.01% DMSO).
ENTREZID	SYMBOL	MAP	logFC	AveExpr	t	P.Value	adj.P.Val	B
8614	STC2	5q35.2	-4.46734	7.64537	-40.1951	9.37488e-23	9.4705e-19	41.076
9687	GREB1	2p25.1	-6.24498	6.52957	-31.8707	1.74721e-20	8.82515e-17	33.7122
169200	TMEM64	8q21.3	-3.007	8.74729	-27.8563	3.54673e-19	1.1943e-15	33.9345
7031	TFF1	21q22.3	-4.50235	8.18795	-24.7736	4.79768e-18	1.21165e-14	31.2804
100506492	DSCAM-AS1	21q22.2	-3.21067	9.25339	-24.1362	8.53607e-18	1.72463e-14	30.8412
79875	THSD4	15q23	-2.87502	6.52008	-22.9577	2.57328e-17	4.33254e-14	29.4997
12	SERPINA3	14q32.13	-3.72431	7.80877	-22.5242	3.91285e-17	5.6468e-14	29.3007
771	CA12	15q22.2	-2.18302	7.49692	-21.4985	1.08706e-16	1.37269e-13	28.3034
2674	GFRA1	10q25.3	-2.48036	7.539	-21.2651	1.38012e-16	1.54911e-13	28.0585
3554	IL1R1	2q11.2-q12.1	3.26186	5.60909	20.6592	2.59367e-16	2.60415e-13	26.8711
4602	MYB	6q23.3	-2.97883	6.04879	-20.5749	2.83564e-16	2.60415e-13	27.067
11031	RAB31	18p11.22	-2.48049	7.05601	-19.1193	1.39417e-15	1.17366e-12	25.7817
23467	NPTXR	22q13.1	1.94493	8.1634	18.4393	3.04497e-15	2.36618e-12	25.0125
4256	MGP	12p12.3	-4.64878	4.63545	-17.9749	5.26908e-15	3.80202e-12	23.0973
5104	SERPINA5	14q32.13	-3.58426	5.63271	-17.254	1.26531e-14	8.52144e-12	23.3672
1826	DSCAM	21q22.2	-3.5569	4.58049	-17.0792	1.57227e-14	9.92692e-12	22.5229
94122	SYTL5	Xp11.4	-4.4525	4.1598	-16.5045	3.25546e-14	1.93451e-11	21.3487
1509	CTSD	11p15.5	-1.71333	10.383	-15.7222	9.08368e-14	5.09796e-11	21.5489
203068	TUBB	6p21.33	-1.55988	8.63233	-15.5692	1.11577e-13	5.93235e-11	21.3876
135398	C6orf141	6p12.3	-2.56472	4.91597	-15.5199	1.19264e-13	6.024e-11	21.209
7164	TPD52L1	6q22.31	-1.76446	6.92599	-15.3783	1.44559e-13	6.95397e-11	21.1714
55573	CDV3	3q22.1	-1.20867	8.9916	-14.7991	3.22533e-13	1.48101e-10	20.3057
23466	CBX6	22q13.1	1.34083	8.82512	14.6153	4.18355e-13	1.83749e-10	20.04
1303	COL12A1	6q13-q14.1	-2.5823	8.81745	-14.1253	8.48018e-13	3.56945e-10	19.321
4886	NPY1R	4q32.2	-4.68183	3.89224	-13.7933	1.38414e-12	5.59303e-10	17.9851
56925	LXN	3q25.32	-1.62968	5.69727	-13.763	1.4482e-12	5.62683e-10	18.8855
79570	NKAIN1	1p35.2	-2.91282	4.13912	-13.7225	1.53841e-12	5.75592e-10	18.4887
84187	TMEM164	Xq23	-1.49737	6.43952	-13.6824	1.6338e-12	5.89452e-10	18.7622
144501	KRT80	12q13.13	1.15628	8.10296	13.5993	1.85109e-12	6.44817e-10	18.5436
4430	MYO1B	2q32.3	1.68658	8.27928	13.201	3.39748e-12	1.14404e-09	17.9256
84612	PARD6B	20q13.13	-1.50951	7.73207	-13.121	3.84477e-12	1.2529e-09	17.8221
3897	L1CAM	Xq28	1.41876	6.70919	12.8322	6.03745e-12	1.90595e-09	17.4247
655	BMP7	20q13.31	1.26587	9.21383	12.6902	7.56e-12	2.31428e-09	17.0884
26353	HSPB8	12q24.23	-1.57737	5.98288	-12.564	9.24576e-12	2.74708e-09	17.0325
1952	CELSR2	1p13.3	-1.45835	8.24445	-12.4349	1.13794e-11	3.28443e-09	16.7026
3939	LDHA	11p15.1	-1.05617	9.03937	-12.3616	1.28134e-11	3.59559e-09	16.5532
4627	MYH9	22q12.3	1.11368	8.90957	12.2974	1.42213e-11	3.8828e-09	16.4477
1191	CLU	8p21.1	1.19741	9.15503	12.28	1.46318e-11	3.88974e-09	16.4037
960	CD44	11p13	-2.78134	4.33936	-12.1999	1.66758e-11	4.31947e-09	16.3374
100133941	CD24	6q21	1.18276	10.8488	12.0438	2.15592e-11	5.33868e-09	15.9566
1345	COX6C	8q22.2	-1.11448	8.67797	-12.0408	2.16676e-11	5.33868e-09	16.0257
753	LDLRAD4	18p11.21	1.72231	5.59467	12.0104	2.2786e-11	5.48057e-09	16.1617
255743	NPNT	4q24	1.47345	8.35936	11.9789	2.40068e-11	5.63993e-09	15.9374
113220	KIF12	9q32	-1.67261	5.62812	-11.9154	2.66847e-11	6.12657e-09	16.0026
6867	TACC1	8p11.22	1.33637	6.54278	11.8418	3.01766e-11	6.77431e-09	15.8282
152926	PPM1K	4q22.1	-2.52415	4.81068	-11.6434	4.2148e-11	9.25607e-09	15.4507
10376	TUBA1B	12q13.12	-1.88149	8.46211	-11.6237	4.35789e-11	9.36668e-09	15.3678
2914	GRM4	6p21.31	2.38902	4.48718	11.5901	4.61393e-11	9.7104e-09	15.3555
8204	NRIP1	21q11.2-q21.1	-1.61144	6.35919	-11.5588	4.86688e-11	1.00337e-08	15.3579
57822	GRHL3	1p36.11	2.21921	4.37202	11.4201	6.1708e-11	1.24675e-08	15.1616
10449	ACAA2	18q21.1	1.70187	5.61221	11.3953	6.43905e-11	1.27544e-08	15.1334
9764	KIAA0513	16q24.1	1.23599	6.2386	11.3203	7.32826e-11	1.42365e-08	14.9166
107	ADCY1	7p12.3	-1.72029	6.00598	-11.2745	7.9339e-11	1.51223e-08	14.8807
578	BAK1	6p21.31	1.72359	6.58907	11.2073	8.91646e-11	1.66804e-08	14.7263
387882	C12orf75	12q23.3	-1.53585	5.23254	-11.127	1.02585e-10	1.85221e-08	14.681
4477	MSMB	10q11.22	-4.90136	2.97832	-11.1265	1.02676e-10	1.85221e-08	13.2613
595	CCND1	11q13.3	-0.94524	9.19476	-11.0964	1.08238e-10	1.91828e-08	14.3553
51765	STK26	Xq26.2	-1.19665	7.39605	-11.019	1.24019e-10	2.16006e-08	14.32
10202	DHRS2	14q11.2	-2.55868	6.47696	-10.9862	1.31419e-10	2.25017e-08	14.3247
596	BCL2	18q21.33	-1.56191	5.80499	-10.9738	1.34314e-10	2.26139e-08	14.3932
60481	ELOVL5	6p12.1	-1.03286	7.21815	-10.9136	1.49429e-10	2.47464e-08	14.1432
29957	SLC25A24	1p13.3	-1.05718	8.23041	-10.8948	1.54502e-10	2.51739e-08	14.0386
284611	FAM102B	1p13.3	-1.12047	8.48595	-10.8374	1.71138e-10	2.74419e-08	13.9303
5241	PGR	11q22.1	-3.69751	5.02148	-10.821	1.76205e-10	2.78128e-08	14.1228
5979	RET	10q11.21	-1.01394	7.75193	-10.7336	2.06051e-10	3.20234e-08	13.7654
4609	MYC	8q24.21	-1.30903	6.61022	-10.7126	2.13969e-10	3.27502e-08	13.8512
6781	STC1	8p21.2	-1.4086	7.21201	-10.7009	2.18512e-10	3.28954e-08	13.7511
11057	ABHD2	15q26.1	-0.946846	7.4472	-10.6935	2.2143e-10	3.28954e-08	13.7214
2717	GLA	Xq22.1	-1.81755	4.66568	-10.6755	2.28736e-10	3.34883e-08	13.8984
4502	MT2A	16q13	1.62412	7.02531	10.6483	2.40221e-10	3.45755e-08	13.7435
25987	TSKU	11q13.5	-1.68199	5.63891	-10.641	2.4343e-10	3.45755e-08	13.8261
7764	ZNF217	20q13.2	1.03226	10.0407	10.6221	2.51878e-10	3.45755e-08	13.4718
7033	TFF3	21q22.3	-2.26173	4.84268	-10.6198	2.52944e-10	3.45755e-08	13.795
4904	YBX1	1p34.2	-0.903213	8.43347	-10.619	2.53275e-10	3.45755e-08	13.5438
64168	NECAB1	8q21.3	-2.08385	4.27639	-10.4745	3.29311e-10	4.4356e-08	13.5388
54855	FAM46C	1p12	-1.3981	5.88774	-10.4179	3.65217e-10	4.85451e-08	13.381
3838	KPNA2	17q24.2	-1.30484	7.7743	-10.3985	3.78467e-10	4.96529e-08	13.2069
619279	ZNF704	8q21.13	1.41058	6.47328	10.3666	4.01287e-10	5.19718e-08	13.2545
2023	ENO1	1p36.23	0.948334	11.148	10.3174	4.39304e-10	5.61754e-08	12.8674
7869	SEMA3B	3p21.31	-1.45393	5.6579	-10.2274	5.1883e-10	6.52154e-08	13.0113
145483	FAM161B	14q24.3	1.76983	4.90181	10.2232	5.22911e-10	6.52154e-08	13.086
60436	TGIF2	20q11.23	-1.38176	5.4716	-10.1953	5.50618e-10	6.78334e-08	12.9963
54898	ELOVL2	6p24.2	-3.31699	5.25968	-10.1601	5.87875e-10	7.15507e-08	12.9717
1501	CTNND2	5p15.2	1.16189	6.74488	10.1466	6.02903e-10	7.25062e-08	12.7838
2317	FLNB	3p14.3	-0.892234	8.83521	-10.128	6.24212e-10	7.41858e-08	12.5953
83641	FAM107B	10p13	1.05297	6.74174	10.1024	6.54763e-10	7.69118e-08	12.7015
124359	CDYL2	16q23.2	0.97995	7.32236	10.0226	7.6033e-10	8.82857e-08	12.4923
8458	TTF2	1p13.1	-1.35553	6.06714	-9.97952	8.24519e-10	9.37764e-08	12.5558
118980	SFXN2	10q24.32	-1.93345	4.91583	-9.97845	8.26183e-10	9.37764e-08	12.626
10057	ABCC5	3q27.1	1.02822	8.29473	9.97234	8.35759e-10	9.38093e-08	12.3255
23052	ENDOD1	11q21	-1.35422	5.75621	-9.96018	8.55139e-10	9.49298e-08	12.5159
2057	EPOR	19p13.2	1.89024	4.45538	9.94546	8.79226e-10	9.58102e-08	12.5562
25800	SLC39A6	18q12.2	-1.77453	9.67771	-9.94377	8.82038e-10	9.58102e-08	12.2047
23022	PALLD	4q32.3	1.05709	6.39582	9.92512	9.13662e-10	9.78225e-08	12.3619
6506	SLC1A2	11p13	-2.24962	4.11977	-9.92151	9.19931e-10	9.78225e-08	12.4709
403	ARL3	10q24.32	-1.28641	5.62927	-9.90106	9.56212e-10	9.99633e-08	12.4223
10079	ATP9A	20q13.2	0.771609	9.17005	9.89905	9.59854e-10	9.99633e-08	12.1389
5046	PCSK6	15q26.3	0.888352	7.014	9.87256	1.00928e-09	1.04039e-07	12.2332
4860	PNP	14q11.2	-1.17843	5.61383	-9.83288	1.08828e-09	1.11048e-07	12.2936
23677	SH3BP4	2q37.2	0.984247	6.95476	9.8228	1.10937e-09	1.12068e-07	12.1349
1030	CDKN2B	9p21.3	2.52928	4.06124	9.74872	1.27773e-09	1.27798e-07	12.1816
51542	VPS54	2p15-p14	1.2067	5.90543	9.73869	1.30249e-09	1.28384e-07	12.0964
5174	PDZK1	1q21.1	-5.72053	2.77922	-9.73608	1.309e-09	1.28384e-07	10.3521
53947	A4GALT	22q13.2	-1.63177	5.1997	-9.72097	1.34744e-09	1.30317e-07	12.1204
84501	SPIRE2	16q24.3	1.30539	5.26485	9.71823	1.35451e-09	1.30317e-07	12.1131
29028	ATAD2	8q24.13	-2.07159	6.17866	-9.68967	1.43079e-09	1.36357e-07	12.06
54828	BCAS3	17q23.2	0.779767	9.75899	9.62161	1.63091e-09	1.53266e-07	11.5704
402778	IFITM10	11p15.5	-2.18299	4.53986	-9.61918	1.63856e-09	1.53266e-07	11.9665
60598	KCNK15	20q13.12	-1.8296	4.28415	-9.6109	1.66493e-09	1.54304e-07	11.9504
90557	CCDC74A	2q21.1	-1.62716	4.99894	-9.56827	1.80788e-09	1.66029e-07	11.8444
23389	MED13L	12q24.21	-0.971169	7.78109	-9.55968	1.83819e-09	1.67292e-07	11.556
1942	EFNA1	1q22	0.959858	6.60395	9.54695	1.88406e-09	1.69936e-07	11.6356
55250	ELP2	18q12.2	-1.26762	7.27775	-9.53568	1.92567e-09	1.72151e-07	11.5417
1903	S1PR3	9q22.1	1.17387	6.40906	9.51088	2.02056e-09	1.78015e-07	11.5723
7905	REEP5	5q22.2	0.775659	8.81742	9.50937	2.0265e-09	1.78015e-07	11.3909
134	ADORA1	1q32.1	-5.23053	1.09028	-9.49378	2.08883e-09	1.81908e-07	9.53826
8805	TRIM24	7q33-q34	0.947238	7.02261	9.47176	2.18023e-09	1.88245e-07	11.4317
3480	IGF1R	15q26.3	-0.91375	7.61634	-9.43008	2.36477e-09	2.02448e-07	11.309
10512	SEMA3C	7q21.11	-0.852069	8.65402	-9.38806	2.5672e-09	2.17931e-07	11.1471
91272	BOD1	5q35.2	-1.16124	6.93626	-9.3609	2.70749e-09	2.27926e-07	11.2263
18	ABAT	16p13.2	-0.724464	8.90875	-9.3396	2.82301e-09	2.35686e-07	11.0354
6990	DYNLT3	Xp11.4	-1.43341	5.20122	-9.2912	3.10493e-09	2.57098e-07	11.2444
3866	KRT15	17q21.2	-2.28492	2.66052	-9.16375	3.995e-09	3.2811e-07	11.0081
5352	PLOD2	3q24	-1.36608	5.98074	-9.14917	4.11244e-09	3.35031e-07	10.9357
10885	WDR3	1p12	-1.09808	6.10127	-9.13651	4.21726e-09	3.40822e-07	10.8748
6241	RRM2	2p25.1	-3.82248	5.58272	-9.13109	4.26299e-09	3.41784e-07	10.9295
2203	FBP1	9q22.32	0.795932	7.80084	9.11612	4.39193e-09	3.49349e-07	10.6665
3921	RPSA	3p22.1	-0.696917	9.57087	-9.09946	4.54026e-09	3.58326e-07	10.5455
8645	KCNK5	6p21.2	-5.58014	1.36573	-9.057	4.94194e-09	3.87004e-07	8.97299
1960	EGR3	8p21.3	-3.51588	3.07691	-9.04254	5.08696e-09	3.95296e-07	10.483
10486	CAP2	6p22.3	-1.43223	5.03068	-9.03599	5.15409e-09	3.97455e-07	10.8055
3664	IRF6	1q32.2	1.66239	6.24849	9.01507	5.3748e-09	4.11335e-07	10.6208
5570	PKIB	6q22.31	-2.19691	5.02151	-9.00113	5.52721e-09	4.19818e-07	10.7605
57153	SLC44A2	19p13.2	0.725338	8.47806	8.99115	5.63908e-09	4.25119e-07	10.3687
22822	PHLDA1	12q21.2	-1.42463	4.93316	-8.97475	5.82796e-09	4.34169e-07	10.6302
4175	MCM6	2q21.3	-1.6335	6.09016	-8.97329	5.84508e-09	4.34169e-07	10.6007
4071	TM4SF1	3q25.1	1.03836	6.7366	8.96256	5.97254e-09	4.40398e-07	10.4408
9915	ARNT2	15q25.1	1.11439	7.63069	8.89214	6.88381e-09	5.02505e-07	10.2098
154810	AMOTL1	11q21	-1.3528	4.78029	-8.88995	6.91429e-09	5.02505e-07	10.5125
4059	BCAM	19q13.32	0.897247	9.05072	8.87794	7.0842e-09	5.11176e-07	10.1013
374	AREG	4q13.3	-5.56708	2.99477	-8.81642	8.02494e-09	5.7495e-07	9.69245
4172	MCM3	6p12.2	-1.13247	6.95972	-8.78757	8.50973e-09	6.05389e-07	10.1036
5909	RAP1GAP	1p36.12	0.88783	6.57214	8.76161	8.97163e-09	6.33786e-07	10.0741
9697	TRAM2	6p12.2	0.868954	6.55597	8.74067	9.36311e-09	6.52435e-07	10.0051
1837	DTNA	18q12.1	0.912001	6.63388	8.74058	9.36479e-09	6.52435e-07	9.99483
124540	MSI2	17q22	-0.761458	8.69072	-8.69984	1.01777e-08	6.95005e-07	9.74581
101927457	LINC01522	20q13.13	-2.12445	3.36842	-8.69887	1.01979e-08	6.95005e-07	10.1688
541471	MIR4435-2HG	2q13	1.41964	5.22506	8.69662	1.02451e-08	6.95005e-07	10.0913
50807	ASAP1	8q24.21-q24.22	1.12464	6.05529	8.69634	1.0251e-08	6.95005e-07	9.97921
8537	BCAS1	20q13.2	1.24984	6.82966	8.66591	1.09103e-08	7.34774e-07	9.7759
1154	CISH	3p21.2	-1.63719	4.37377	-8.65046	1.12617e-08	7.53412e-07	10.078
6249	CLIP1	12q24.31	0.916208	6.82066	8.64384	1.14158e-08	7.58697e-07	9.78865
493	ATP2B4	1q32.1	-1.17981	5.77331	-8.62066	1.19726e-08	7.82059e-07	9.84634
6548	SLC9A1	1p36.11	0.977587	7.87767	8.62019	1.19843e-08	7.82059e-07	9.63453
84525	HOPX	4q12	2.61796	2.52949	8.61957	1.19995e-08	7.82059e-07	9.73635
29948	OSGIN1	16q23.3	-1.29876	4.47891	-8.61077	1.22188e-08	7.91248e-07	9.95712
28966	SNX24	5q23.2	-1.39032	4.82653	-8.60192	1.24433e-08	8.0065e-07	9.95025
7076	TIMP1	Xp11.3	-0.942063	6.58064	-8.59066	1.27352e-08	8.14249e-07	9.66399
1662	DDX10	11q22.3	-1.54851	4.32969	-8.57346	1.31949e-08	8.38334e-07	9.91596
4830	NME1	17q21.33	-1.28329	5.57138	-8.56768	1.33534e-08	8.39674e-07	9.78218
7494	XBP1	22q12.1	-1.01695	11.1254	-8.56663	1.33822e-08	8.39674e-07	9.36528
221662	RBM24	6p22.3	-2.89063	2.61462	-8.52787	1.44981e-08	9.04074e-07	9.3565
10606	PAICS	4q12	-0.739411	8.06148	-8.51574	1.48666e-08	9.21366e-07	9.40334
7357	UGCG	9q31.3	-1.14592	5.41491	-8.5065	1.51538e-08	9.33438e-07	9.65482
26154	ABCA12	2q35	-1.8361	7.39513	-8.49354	1.55664e-08	9.5304e-07	9.42695
643161	FAM25A	10q23.2	-2.75976	2.25754	-8.48561	1.58243e-08	9.62553e-07	9.45344
23327	NEDD4L	18q21.31	1.07899	6.59291	8.48294	1.59123e-08	9.62553e-07	9.46163
29956	CERS2	1q21.3	0.71463	9.95244	8.45682	1.67992e-08	1.01015e-06	9.18095
10627	MYL12A	18p11.31	0.706907	9.39581	8.45019	1.70324e-08	1.01812e-06	9.18441
55157	DARS2	1q25.1	-0.987591	6.83077	-8.44157	1.73404e-08	1.03043e-06	9.38274
131870	NUDT16	3q22.1	0.845478	7.00125	8.43469	1.75902e-08	1.03761e-06	9.3271
200879	LIPH	3q27.2	1.97794	4.20429	8.43261	1.76667e-08	1.03761e-06	9.63964
5315	PKM	15q23	-0.723718	10.8648	-8.4213	1.80877e-08	1.05486e-06	9.06739
6585	SLIT1	10q24.1	3.34541	2.32117	8.41914	1.81693e-08	1.05486e-06	8.93651
8202	NCOA3	20q13.12	0.713848	12.0949	8.39378	1.91558e-08	1.10578e-06	8.97846
85004	RERG	12p12.3	-2.35003	3.32192	-8.37598	1.98809e-08	1.13977e-06	9.47984
9055	PRC1	15q26.1	-2.03592	5.75141	-8.37383	1.99702e-08	1.13977e-06	9.50711
6790	AURKA	20q13.2	-1.58886	5.98996	-8.35782	2.065e-08	1.17194e-06	9.42974
9188	DDX21	10q22.1	-0.833684	7.10191	-8.30342	2.31426e-08	1.30607e-06	9.03221
7042	TGFB2	1q41	2.73245	3.06294	8.28908	2.385e-08	1.33851e-06	9.18538
901	CCNG2	4q21.1	0.959331	7.10905	8.28171	2.4222e-08	1.35188e-06	8.99601
57530	CGN	1q21.3	0.723116	7.62584	8.27041	2.48041e-08	1.37676e-06	8.91949
11254	SLC6A14	Xq23	-2.63879	3.37433	-8.26445	2.51171e-08	1.38652e-06	9.20134
56937	PMEPA1	20q13.31	0.711156	8.59332	8.24736	2.60373e-08	1.42951e-06	8.78052
7113	TMPRSS2	21q22.3	1.03278	5.93931	8.23857	2.65238e-08	1.44834e-06	9.0337
8646	CHRD	3q27.1	2.99843	2.68877	8.23358	2.68044e-08	1.45502e-06	8.98839
5074	PAWR	12q21.2	0.977344	7.64657	8.22935	2.70441e-08	1.45502e-06	8.81757
8870	IER3	6p21.33	-0.881782	7.01415	-8.22875	2.70783e-08	1.45502e-06	8.86293
80139	ZNF703	8p11.23	-1.21717	6.50299	-8.19195	2.9266e-08	1.56426e-06	8.88913
9221	NOLC1	10q24.32	-0.853194	7.25993	-8.18937	2.9426e-08	1.56454e-06	8.76536
6059	ABCE1	4q31.21	-0.901632	6.08844	-8.18389	2.97684e-08	1.57445e-06	8.90216
444	ASPH	8q12.3	-1.15715	5.12179	-8.1788	3.00908e-08	1.58322e-06	9.04186
2237	FEN1	11q12.2	-1.66086	5.21589	-8.15846	3.14144e-08	1.64429e-06	9.02304
7162	TPBG	6q14.1	-0.99081	6.66698	-8.11961	3.41116e-08	1.77626e-06	8.69362
55388	MCM10	10p13	-5.40083	2.32112	-8.11097	3.47437e-08	1.7999e-06	7.55084
64116	SLC39A8	4q24	-2.15658	4.68057	-8.10786	3.49735e-08	1.80256e-06	8.94375
83990	BRIP1	17q23.2	-1.52058	6.77752	-8.09372	3.60412e-08	1.84816e-06	8.68416
7804	LRP8	1p32.3	-1.52346	4.68176	-8.0848	3.67312e-08	1.87404e-06	8.87814
729375	FAM86HP	3q22.1	1.35646	4.70803	8.08003	3.71056e-08	1.88362e-06	8.8236
23062	GGA2	16p12.2	-0.704643	7.30659	-8.02175	4.20152e-08	2.12219e-06	8.38474
4605	MYBL2	20q13.12	-3.51122	5.52656	-8.0066	4.33984e-08	2.17672e-06	8.75736
55319	TMA16	4q32.2	-1.33662	4.72655	-8.00522	4.35259e-08	2.17672e-06	8.70572
90427	BMF	15q15.1	1.42318	5.04402	8.00189	4.38376e-08	2.18151e-06	8.70417
11320	MGAT4A	2q11.2	0.989132	7.47506	7.99232	4.47438e-08	2.21569e-06	8.2994
55450	CAMK2N1	1p36.12	0.915239	7.82608	7.97787	4.61495e-08	2.27416e-06	8.26128
1876	E2F6	2p25.1	-1.00807	5.80649	-7.96964	4.69711e-08	2.30341e-06	8.47053
9215	LARGE1	22q12.3	-1.00374	6.26375	-7.95343	4.86324e-08	2.37335e-06	8.37932
7057	THBS1	15q14	0.842785	8.57334	7.93581	5.05065e-08	2.44016e-06	8.12526
26509	MYOF	10q23.33	-0.719678	8.38765	-7.93394	5.07092e-08	2.44016e-06	8.1203
11163	NUDT4	12q22	0.90354	6.71	7.93379	5.0726e-08	2.44016e-06	8.29877
161145	TMEM229B	14q24.1	-1.1913	4.37032	-7.91446	5.28783e-08	2.53164e-06	8.51289
4584	MUC3A	7q22.1	2.74136	2.73722	7.90139	5.43859e-08	2.59154e-06	8.44386
2064	ERBB2	17q12	0.642612	8.34697	7.89026	5.57049e-08	2.64193e-06	8.03388
4176	MCM7	7q22.1	-1.30053	6.55587	-7.88356	5.65138e-08	2.65676e-06	8.24913
79801	SHCBP1	16q11.2	-5.272	2.31201	-7.88332	5.65436e-08	2.65676e-06	7.08208
56999	ADAMTS9	3p14.1	-2.15112	3.06741	-7.87134	5.80221e-08	2.71361e-06	8.44199
374443	LOC374443	12p13.31	1.55139	4.30048	7.85377	6.0264e-08	2.79851e-06	8.4401
10549	PRDX4	Xp22.11	-1.07945	6.8606	-7.85279	6.03916e-08	2.79851e-06	8.09133
83719	YPEL3	16p11.2	0.986918	6.61242	7.83316	6.30066e-08	2.90636e-06	8.05522
9536	PTGES	9q34.11	-3.73089	3.24227	-7.82628	6.39509e-08	2.92945e-06	8.18272
22836	RHOBTB3	5q15	-1.03262	9.03466	-7.8253	6.40873e-08	2.92945e-06	7.85023
3329	HSPD1	2q33.1	-0.605265	9.15788	-7.81909	6.49534e-08	2.95567e-06	7.8416
54621	VSIG10	12q24.23	0.831381	6.22136	7.81375	6.57088e-08	2.97664e-06	8.09319
55061	SUSD4	1q41	-1.15112	4.79621	-7.74058	7.70075e-08	3.46038e-06	8.09004
55332	DRAM1	12q23.2	1.11994	7.28463	7.7402	7.70724e-08	3.46038e-06	7.78704
9601	PDIA4	7q36.1	-0.644148	9.00788	-7.72897	7.89765e-08	3.53018e-06	7.65235
4678	NASP	1p34.1	-1.14822	6.38502	-7.72354	7.99149e-08	3.55639e-06	7.89937
2618	GART	21q22.11	-0.860449	6.43179	-7.71269	8.18245e-08	3.61749e-06	7.85001
8031	NCOA4	10q11.22	-0.707459	8.02871	-7.71169	8.2004e-08	3.61749e-06	7.64808
57648	KIAA1522	1p35.1	0.637449	8.76909	7.70771	8.27166e-08	3.63306e-06	7.609
8140	SLC7A5	16q24.2	-1.19383	7.60851	-7.70527	8.31586e-08	3.63666e-06	7.76088
165215	FAM171B	2q32.1	1.13269	5.61777	7.69795	8.44954e-08	3.67919e-06	7.94621
342184	FMN1	15q13.3	-2.05613	3.48995	-7.66255	9.12783e-08	3.95532e-06	8.02502
768211	RELL1	4p14	1.45413	4.33722	7.66084	9.16201e-08	3.95532e-06	8.02196
22948	CCT5	5p15.2	-0.652309	8.61997	-7.64735	9.43619e-08	4.05636e-06	7.4866
55686	MREG	2q35	-0.967562	6.44462	-7.64219	9.54321e-08	4.08498e-06	7.65254
306	ANXA3	4q21.21	1.42055	5.00181	7.63614	9.67028e-08	4.12191e-06	7.83533
1021	CDK6	7q21.2	1.85693	3.89808	7.6159	1.01083e-07	4.2905e-06	7.94868
55215	FANCI	15q26.1	-1.98265	5.24325	-7.6111	1.02151e-07	4.31771e-06	7.905
8648	NCOA1	2p23.3	0.834359	6.84838	7.59498	1.05826e-07	4.45439e-06	7.51755
642515	PRRT1B	9q34.13	1.40408	4.81215	7.58798	1.07464e-07	4.50459e-06	7.81534
2288	FKBP4	12p13.33	-0.636421	8.45397	-7.58433	1.08329e-07	4.52206e-06	7.34564
57189	KIAA1147	7q34	0.763139	6.93278	7.58143	1.0902e-07	4.53219e-06	7.49962
3615	IMPDH2	3p21.31	-0.677885	7.89757	-7.5564	1.15182e-07	4.76872e-06	7.32684
2355	FOSL2	2p23.2	-0.942539	6.08673	-7.54093	1.19168e-07	4.9136e-06	7.4803
4070	TACSTD2	1p32.1	0.751457	8.78691	7.53765	1.2003e-07	4.92906e-06	7.21814
3860	KRT13	17q21.2	-5.5375	-0.652074	-7.5288	1.22392e-07	5.00569e-06	6.613
59345	GNB4	3q26.33	-1.24204	5.16832	-7.5234	1.23857e-07	5.04516e-06	7.64717
9643	MORF4L2	Xq22.2	-0.612734	9.02365	-7.51518	1.2612e-07	5.11671e-06	7.1654
4171	MCM2	3q21.3	-1.92154	5.72756	-7.49872	1.3078e-07	5.28458e-06	7.5962
705	BYSL	6p21.1	-1.35073	4.50714	-7.49176	1.32803e-07	5.34494e-06	7.62079
43	ACHE	7q22.1	3.37023	2.75701	7.4803	1.36207e-07	5.46017e-06	7.58522
516	ATP5MC1	17q21.32	-1.03981	5.93464	-7.46924	1.39573e-07	5.573e-06	7.37005
23641	LDOC1	Xq27.1	0.740359	8.02512	7.46089	1.42174e-07	5.65449e-06	7.09734
51303	FKBP11	12q13.12	-1.09298	4.85393	-7.45328	1.44588e-07	5.72794e-06	7.47063
54790	TET2	4q24	-1.02201	5.87081	-7.44741	1.46476e-07	5.78007e-06	7.30518
3992	FADS1	11q12.2	-0.950045	6.30487	-7.44233	1.48135e-07	5.82279e-06	7.23775
6206	RPS12	6q23.2	-0.771567	9.029	-7.43598	1.50231e-07	5.88229e-06	6.99003
288	ANK3	10q21.2	0.925156	7.45685	7.43171	1.51657e-07	5.91521e-06	7.0881
120224	TMEM45B	11q24.3	1.50965	5.66251	7.37778	1.70932e-07	6.64137e-06	7.21552
115106	HAUS1	18q21.1	-1.72513	3.97175	-7.37188	1.73185e-07	6.70314e-06	7.42913
7089	TLE2	19p13.3	1.01844	6.31831	7.36892	1.74329e-07	6.72164e-06	7.08767
143458	LDLRAD3	11p13	-1.21735	4.49286	-7.36335	1.76502e-07	6.77956e-06	7.32879
51347	TAOK3	12q24.23	1.00256	6.26821	7.34947	1.82036e-07	6.94171e-06	7.05954
79762	C1orf115	1q41	1.2862	5.34257	7.34932	1.82098e-07	6.94171e-06	7.19656
400793	C1orf226	1q23.3	-1.33775	4.69346	-7.34756	1.82811e-07	6.94269e-06	7.26836
4052	LTBP1	2p22.3	0.924992	6.91921	7.32379	1.92754e-07	7.29289e-06	6.89644
2948	GSTM4	1p13.3	0.727044	6.41707	7.31529	1.9644e-07	7.40462e-06	6.91511
3015	H2AFZ	4q23	-0.867489	7.7332	-7.30965	1.98925e-07	7.47042e-06	6.84137
56950	SMYD2	1q32.3	0.999396	5.29162	7.29752	2.04385e-07	7.64702e-06	7.05127
25879	DCAF13	8q22.3	-0.697611	6.61198	-7.29388	2.06053e-07	7.68098e-06	6.8707
3488	IGFBP5	2q35	-1.28609	6.36458	-7.28896	2.0833e-07	7.73731e-06	6.89007
10388	SYCP2	20q13.33	1.0155	5.96549	7.2862	2.09619e-07	7.75666e-06	6.93596
11346	SYNPO	5q33.1	1.34654	4.97203	7.28117	2.11989e-07	7.79148e-06	7.11428
11259	FILIP1L	3q12.1	2.19893	3.3695	7.27765	2.13662e-07	7.79148e-06	7.19858
9768	PCLAF	15q22.31	-2.96469	4.12994	-7.2771	2.13925e-07	7.79148e-06	7.11468
9124	PDLIM1	10q23.33	0.852395	6.00875	7.27624	2.14337e-07	7.79148e-06	6.87423
3717	JAK2	9p24.1	-1.59198	3.82965	-7.27607	2.14416e-07	7.79148e-06	7.20164
200315	APOBEC3A	22q13.1	4.50674	0.97409	7.27262	2.16074e-07	7.8236e-06	6.12838
84617	TUBB6	18p11.21	-0.849489	5.73378	-7.26843	2.18113e-07	7.86745e-06	6.87535
10797	MTHFD2	2p13.1	-0.787547	7.64089	-7.26693	2.18843e-07	7.86745e-06	6.76652
64285	RHBDF1	16p13.3	0.849136	6.61293	7.26503	2.19777e-07	7.87302e-06	6.79625
55690	PACS1	11q13.1-q13.2	0.649041	7.97021	7.26274	2.20902e-07	7.88536e-06	6.64445
6187	RPS2	16p13.3	-0.596527	11.257	-7.26032	2.22105e-07	7.90037e-06	6.50474
2181	ACSL3	2q36.1	0.699595	7.68018	7.25726	2.23628e-07	7.92663e-06	6.66485
164832	LONRF2	2q11.2	-0.979712	6.80097	-7.23289	2.3617e-07	8.32808e-06	6.68875
50604	IL20	1q32.1	-4.01716	1.61806	-7.23208	2.36603e-07	8.32808e-06	6.15767
6478	SIAH2	3q25.1	-0.835032	6.4914	-7.21385	2.46474e-07	8.64543e-06	6.70708
55759	WDR12	2q33.2	-1.18042	4.84916	-7.21085	2.48135e-07	8.67356e-06	6.9685
2539	G6PD	Xq28	-1.1193	8.80629	-7.19438	2.57482e-07	8.96515e-06	6.44328
150468	CKAP2L	2q14.1	-4.28515	1.51956	-7.19305	2.58252e-07	8.96515e-06	5.78057
638	BIK	22q13.2	1.45407	4.31845	7.18274	2.64307e-07	9.14394e-06	6.9725
345079	SOWAHB	4q21.1	1.0996	4.6248	7.17509	2.68894e-07	9.27087e-06	6.84181
4522	MTHFD1	14q23.3	-0.969835	6.56304	-7.16517	2.74958e-07	9.44771e-06	6.61434
3694	ITGB6	2q24.2	1.16545	6.79833	7.14472	2.87911e-07	9.85721e-06	6.44375
10125	RASGRP1	15q14	-2.80828	2.23126	-7.14331	2.88827e-07	9.85721e-06	6.82003
143888	KDELC2	11q22.3	1.46132	4.55802	7.12502	3.00985e-07	1.02066e-05	6.82937
5052	PRDX1	1p34.1	-0.645461	9.61021	-7.12487	3.01086e-07	1.02066e-05	6.24954
55771	PRR11	17q22	-3.13608	5.45503	-7.12245	3.02734e-07	1.02281e-05	6.86959
1316	KLF6	10p15.2	1.06175	5.47185	7.10783	3.12883e-07	1.05358e-05	6.5883
55625	ZDHHC7	16q24.1	0.849976	7.87077	7.1049	3.14959e-07	1.05705e-05	6.28619
51232	CRIM1	2p22.2	0.883286	6.40362	7.09536	3.21818e-07	1.07427e-05	6.43252
155185	AMZ1	7p22.3	-2.18423	3.38359	-7.09482	3.22216e-07	1.07427e-05	6.82214
5045	FURIN	15q26.1	0.959802	6.49934	7.09067	3.25246e-07	1.0808e-05	6.44481
11065	UBE2C	20q13.12	-4.15992	4.7584	-7.07339	3.38203e-07	1.12017e-05	6.50878
5295	PIK3R1	5q13.1	-1.13824	7.46986	-7.0693	3.4135e-07	1.1269e-05	6.22428
11200	CHEK2	22q12.1	-1.26224	4.96104	-7.0555	3.52178e-07	1.15886e-05	6.59732
3398	ID2	2p25.1	0.925672	6.66448	7.04779	3.58384e-07	1.17545e-05	6.34428
1933	EEF1B2	2q33.3	-0.705174	8.40636	-7.02406	3.78182e-07	1.23637e-05	6.08334
9833	MELK	9p13.2	-3.07324	3.12186	-7.02261	3.79431e-07	1.23645e-05	6.24251
489	ATP2A3	17p13.2	0.661602	7.34342	7.00126	3.98264e-07	1.29365e-05	6.09956
27314	RAB30	11q14.1	-0.943775	6.36715	-6.99274	4.06052e-07	1.31472e-05	6.21522
8607	RUVBL1	3q21.3	-0.932074	6.04074	-6.98994	4.0864e-07	1.31887e-05	6.2748
351	APP	21q21.3	0.57615	9.97404	6.98677	4.11597e-07	1.32419e-05	5.91836
29959	NRBP1	2p23.3	0.702825	8.78473	6.98077	4.17249e-07	1.33698e-05	5.95416
2013	EMP2	16p13.13	-0.603318	9.0435	-6.97975	4.1822e-07	1.33698e-05	5.95072
55754	TMEM30A	6q14.1	0.878476	6.98676	6.97526	4.22507e-07	1.34268e-05	6.08798
79660	PPP1R3B	8p23.1	-0.719851	6.10687	-6.9751	4.22661e-07	1.34268e-05	6.16142
3161	HMMR	5q34	-4.5296	2.52554	-6.97306	4.24636e-07	1.34472e-05	5.57147
9368	SLC9A3R1	17q25.1	-0.70831	9.33284	-6.95017	4.47344e-07	1.41221e-05	5.86101
55806	HR	8p21.3	-1.6067	3.82578	-6.94144	4.56326e-07	1.43608e-05	6.48002
56521	DNAJC12	10q21.3	-0.947573	6.19945	-6.93662	4.6137e-07	1.44744e-05	6.10203
652	BMP4	14q22.2	1.32249	4.53411	6.9336	4.64551e-07	1.45291e-05	6.38771
57167	SALL4	20q13.2	1.49252	5.46037	6.92563	4.73073e-07	1.47499e-05	6.21871
2274	FHL2	2q12.2	-1.68759	3.44816	-6.91948	4.79762e-07	1.48976e-05	6.41789
23397	NCAPH	2q11.2	-4.51265	2.85372	-6.91857	4.80759e-07	1.48976e-05	5.51695
79887	PLBD1	12p13.1	1.00786	6.73184	6.91481	4.84902e-07	1.49801e-05	6.00548
5932	RBBP8	18q11.2	-1.15998	5.40228	-6.90327	4.9784e-07	1.53001e-05	6.16081
3229	HOXC13	12q13.13	1.05113	4.5992	6.90288	4.98291e-07	1.53001e-05	6.2655
113130	CDCA5	11q13.1	-2.73195	4.13594	-6.89575	5.06464e-07	1.55039e-05	6.35668
5901	RAN	12q24.33	-0.596204	8.67064	-6.89051	5.12567e-07	1.56354e-05	5.76235
125144	LRRC75A-AS1	17p11.2	-0.850788	7.74162	-6.88941	5.13854e-07	1.56354e-05	5.82128
6188	RPS3	11q13.4	-0.574426	10.5922	-6.88737	5.16255e-07	1.56613e-05	5.6636
9500	MAGED1	Xp11.22	-0.655281	7.38054	-6.88474	5.19378e-07	1.57088e-05	5.81556
116113	FOXP4	6p21.1	0.766981	7.32923	6.87767	5.27842e-07	1.58871e-05	5.8323
10184	LHFPL2	5q14.1	0.907959	5.83902	6.87653	5.29216e-07	1.58871e-05	6.01665
79710	MORC4	Xq22.3	-0.92685	5.35534	-6.87589	5.29988e-07	1.58871e-05	6.083
6124	RPL4	15q22.31	-0.507331	10.8041	-6.86881	5.38642e-07	1.60987e-05	5.61307
5874	RAB27B	18q21.2	1.48165	6.85207	6.8623	5.46728e-07	1.6257e-05	5.8595
29089	UBE2T	1q32.1	-1.73753	4.2502	-6.86196	5.47157e-07	1.6257e-05	6.32116
57717	PCDHB16	5q31.3	-1.89295	3.49031	-6.86005	5.49548e-07	1.62801e-05	6.31664
1999	ELF3	1q32.1	0.702406	6.56123	6.85703	5.53361e-07	1.63452e-05	5.84189
3964	LGALS8	1q43	0.744448	6.58108	6.85407	5.57124e-07	1.64084e-05	5.87334
9674	KIAA0040	1q25.1	-0.890846	5.46949	-6.84242	5.72199e-07	1.68034e-05	6.02257
54865	GPATCH4	1q22-q23.1	-0.891522	5.66169	-6.83435	5.8287e-07	1.70671e-05	5.93537
1580	CYP4B1	1p33	1.77125	4.0705	6.825	5.95507e-07	1.73867e-05	6.21135
3182	HNRNPAB	5q35.3	-0.630324	7.86205	-6.82146	6.00368e-07	1.74781e-05	5.63727
54843	SYTL2	11q14.1	0.601542	9.47543	6.81174	6.13907e-07	1.78209e-05	5.5273
79968	WDR76	15q15.3	-4.43287	1.59882	-6.80804	6.19142e-07	1.78999e-05	5.24813
267	AMFR	16q13	-0.593142	7.36805	-6.80732	6.2017e-07	1.78999e-05	5.65807
6161	RPL32	3p25.2	-0.620618	10.1975	-6.7943	6.38992e-07	1.83906e-05	5.4625
51564	HDAC7	12q13.11	0.706585	6.176	6.7899	6.45484e-07	1.84745e-05	5.77842
2037	EPB41L2	6q23.1-q23.2	0.793835	6.86686	6.78984	6.45564e-07	1.84745e-05	5.68509
55651	NHP2	5q35.3	-0.6406	7.9225	-6.78637	6.50733e-07	1.85698e-05	5.56298
2888	GRB14	2q24.3	2.11938	3.91759	6.78373	6.54701e-07	1.86304e-05	6.14767
991	CDC20	1p34.2	-3.3946	4.33721	-6.77214	6.72378e-07	1.90797e-05	6.00491
9619	ABCG1	21q22.3	1.09853	7.67902	6.77017	6.75438e-07	1.91128e-05	5.5677
10024	TROAP	12q13.12	-4.16929	3.28273	-6.74906	7.09071e-07	1.99678e-05	5.24549
81620	CDT1	16q24.3	-2.15211	4.05198	-6.74873	7.09608e-07	1.99678e-05	6.05041
81611	ANP32E	1q21.2	-0.901185	5.975	-6.74366	7.17946e-07	2.01464e-05	5.76926
8438	RAD54L	1p34.1	-3.80467	2.0864	-6.74132	7.21825e-07	2.01991e-05	5.16962
3312	HSPA8	11q24.1	-0.627619	10.6131	-6.73287	7.36027e-07	2.05396e-05	5.2928
55744	COA1	7p13	-0.84979	5.72197	-6.73006	7.40808e-07	2.06161e-05	5.72061
4680	CEACAM6	19q13.2	2.11882	3.34464	6.72524	7.49087e-07	2.07892e-05	6.01772
333926	PPM1J	1p13.2	-1.43883	4.53617	-6.71993	7.58314e-07	2.09334e-05	5.86998
140730	RIMS4	20q13.12	-1.37972	4.73456	-6.71987	7.58428e-07	2.09334e-05	5.84111
10528	NOP56	20p13	-0.90801	6.548	-6.71419	7.68418e-07	2.111e-05	5.54308
55568	GALNT10	5q33.2	0.865521	7.1309	6.71386	7.69006e-07	2.111e-05	5.46043
340895	MALRD1	10p12.31	-1.03673	5.89301	-6.7048	7.85258e-07	2.14967e-05	5.59631
389337	ARHGEF37	5q32	1.21192	4.62112	6.70312	7.88317e-07	2.14967e-05	5.81511
10551	AGR2	7p21.1	-2.28106	5.94919	-6.70248	7.89476e-07	2.14967e-05	5.61104
3105	HLA-A	6p22.1	-0.941531	5.98821	-6.69576	8.01816e-07	2.17237e-05	5.62024
10451	VAV3	1p13.3	-0.773225	7.10405	-6.69561	8.02112e-07	2.17237e-05	5.44419
10276	NET1	10p15.1	0.544244	9.2438	6.69426	8.04616e-07	2.17332e-05	5.28271
2353	FOS	14q24.3	-1.28865	6.26975	-6.69232	8.08228e-07	2.17726e-05	5.48565
10131	TRAP1	16p13.3	-0.676754	7.37537	-6.68027	8.31045e-07	2.23277e-05	5.37007
6782	HSPA13	21q11.2	-0.900238	5.84735	-6.67686	8.3762e-07	2.24447e-05	5.60006
9232	PTTG1	5q33.3	-3.90153	3.20149	-6.67096	8.49127e-07	2.26928e-05	5.22574
9914	ATP2C2	16q24.1	0.752486	7.17493	6.66876	8.53463e-07	2.27485e-05	5.40889
203328	SUSD3	9q22.31	-2.8493	2.20603	-6.64178	9.08458e-07	2.41239e-05	5.59985
57118	CAMK1D	10p13	0.775897	5.72223	6.64113	9.09841e-07	2.41239e-05	5.50058
729993	SHISA9	16p13.12	0.81366	5.76929	6.63914	9.14043e-07	2.41719e-05	5.5084
63875	MRPL17	11p15.4	-0.846145	5.34531	-6.63725	9.1804e-07	2.42142e-05	5.55007
84790	TUBA1C	12q13.12	-0.678472	7.78397	-6.6058	9.87505e-07	2.59786e-05	5.1732
5366	PMAIP1	18q21.32	-2.59049	1.59901	-6.5912	1.02155e-06	2.68044e-05	5.45503
54478	PIMREG	17p13.2	-4.25927	1.13034	-6.58893	1.02696e-06	2.68765e-05	4.69578
6256	RXRA	9q34.2	0.694767	7.70531	6.58575	1.03458e-06	2.70061e-05	5.11936
64105	CENPK	5q12.3	-3.68828	2.01046	-6.56938	1.07469e-06	2.79807e-05	4.83017
163	AP2B1	17q12	-0.523448	8.35179	-6.54701	1.13213e-06	2.94003e-05	4.97252
79077	DCTPP1	16p11.2	-0.651116	6.32411	-6.53151	1.17374e-06	3.04029e-05	5.12941
23642	SNHG1	11q12.3	-0.779615	5.97093	-6.52065	1.20382e-06	3.11022e-05	5.22103
4839	NOP2	12p13.31	-0.912136	5.34583	-6.50551	1.2471e-06	3.21382e-05	5.23559
5770	PTPN1	20q13.13	-0.548272	7.81391	-6.50183	1.25785e-06	3.23329e-05	4.88859
6218	RPS17	15q25.2	-0.634504	10.1085	-6.4962	1.27447e-06	3.26434e-05	4.76389
23635	SSBP2	5q14.1	0.972257	5.67054	6.49556	1.2764e-06	3.26434e-05	5.24131
58190	CTDSP1	2q35	0.660268	6.81198	6.49088	1.29042e-06	3.29189e-05	5.00578
3399	ID3	1p36.12	0.79837	6.24116	6.48947	1.29467e-06	3.29439e-05	5.01026
8914	TIMELESS	12q13.3	-1.24198	5.51105	-6.48593	1.30543e-06	3.31024e-05	5.25526
8495	PPFIBP2	11p15.4	1.41757	4.72598	6.48526	1.30745e-06	3.31024e-05	5.37396
7203	CCT3	1q22	-0.511057	8.80082	-6.47843	1.32848e-06	3.35507e-05	4.78242
23234	DNAJC9	10q22.2	-0.946649	5.41172	-6.47006	1.35473e-06	3.41283e-05	5.20523
6493	SIM2	21q22.13	1.16457	4.40649	6.45167	1.41428e-06	3.54569e-05	5.26871
6185	RPN2	20q11.23	-0.501174	9.59715	-6.4516	1.41448e-06	3.54569e-05	4.6807
990	CDC6	17q21.2	-2.97771	3.30584	-6.4392	1.45615e-06	3.64108e-05	5.26563
64798	DEPTOR	8q24.12	-1.61079	4.33585	-6.42332	1.51133e-06	3.76974e-05	5.275
255488	RNF144B	6p22.3	1.60022	3.82835	6.4174	1.53242e-06	3.81294e-05	5.31335
23654	PLXNB2	22q13.33	0.623056	9.16778	6.41602	1.53739e-06	3.8159e-05	4.60915
694	BTG1	12q21.33	0.954976	6.7064	6.39649	1.60945e-06	3.98497e-05	4.75902
2760	GM2A	5q33.1	-0.69098	6.14647	-6.39434	1.61757e-06	3.99528e-05	4.83213
957	ENTPD5	14q24.3	0.794337	5.81148	6.39109	1.62997e-06	4.01608e-05	4.88271
7153	TOP2A	17q21.2	-3.15708	5.97633	-6.36113	1.74878e-06	4.29834e-05	5.18402
51633	OTUD6B	8q21.3	-0.899566	5.20508	-6.35723	1.76489e-06	4.3274e-05	4.88639
7903	ST8SIA4	5q21.1	1.28764	4.51715	6.34195	1.8295e-06	4.47496e-05	5.01035
112597	CYTOR	2p11.2	1.17756	4.218	6.33562	1.85694e-06	4.53112e-05	5.05432
10529	NEBL	10p12.31	0.54988	8.37652	6.32251	1.91513e-06	4.66185e-05	4.43092
7083	TK1	17q25.3	-2.65106	3.88	-6.31967	1.92798e-06	4.68183e-05	5.06403
672	BRCA1	17q21.31	-2.94773	3.50662	-6.31597	1.94486e-06	4.71149e-05	5.02317
84172	POLR1B	2q14.1	-0.835814	5.36757	-6.31416	1.95316e-06	4.72028e-05	4.78047
9837	GINS1	20p11.21	-1.75787	4.22996	-6.3122	1.96222e-06	4.73086e-05	5.07339
9620	CELSR1	22q13.31	-0.686762	8.07721	-6.30615	1.99041e-06	4.7874e-05	4.41217
79818	ZNF552	19q13.43	-1.24346	4.67903	-6.29593	2.0389e-06	4.8924e-05	4.84614
6310	ATXN1	6p22.3	0.753035	5.77132	6.29318	2.0522e-06	4.91263e-05	4.72209
5831	PYCR1	17q25.3	-0.732263	6.82616	-6.29116	2.06197e-06	4.92436e-05	4.53576
4001	LMNB1	5q23.2	-1.11014	6.28373	-6.27979	2.11805e-06	5.04635e-05	4.69014
2091	FBL	19q13.2	-0.614276	7.0946	-6.27048	2.16513e-06	5.14639e-05	4.45022
6222	RPS18	6p21.32	-0.580301	10.6919	-6.26786	2.17857e-06	5.16618e-05	4.19487
55766	H2AFJ	12p12.3	-0.611037	7.28515	-6.26577	2.18931e-06	5.17489e-05	4.40072
50810	HDGFL3	15q25.2	0.639585	7.5189	6.26516	2.19249e-06	5.17489e-05	4.36207
387680	WASHC2A	10q11.23	0.760443	6.34265	6.26351	2.20102e-06	5.18292e-05	4.49842
22998	LIMCH1	4p13	1.26888	5.04515	6.25785	2.23067e-06	5.231e-05	4.72701
1111	CHEK1	11q24.2	-2.04451	3.85092	-6.25764	2.2318e-06	5.231e-05	4.97614
598	BCL2L1	20q11.21	0.684543	7.15682	6.23791	2.33829e-06	5.46792e-05	4.31961
6136	RPL12	9q33.3	-0.588294	9.99899	-6.23385	2.36089e-06	5.50802e-05	4.14302
9543	IGDCC3	15q22.31	0.985995	4.65691	6.2305	2.37967e-06	5.53903e-05	4.70666
122786	FRMD6	14q22.1	1.09802	5.08584	6.22812	2.3931e-06	5.55749e-05	4.65818
6228	RPS23	5q14.2	-0.548251	9.44096	-6.2256	2.40741e-06	5.57791e-05	4.14975
26960	NBEA	13q13.3	1.03251	5.96865	6.21029	2.49624e-06	5.75855e-05	4.43357
332	BIRC5	17q25.3	-4.75739	3.56899	-6.2102	2.49678e-06	5.75855e-05	4.28768
4494	MT1F	16q13	1.66863	3.9762	6.20504	2.52745e-06	5.81602e-05	4.84413
51196	PLCE1	10q23.33	3.17468	2.24214	6.20274	2.54128e-06	5.83455e-05	4.483
10682	EBP	Xp11.23	-0.969336	5.10157	-6.19414	2.59358e-06	5.94112e-05	4.56568
7022	TFAP2C	20q13.31	-0.714343	6.86451	-6.19306	2.60022e-06	5.94285e-05	4.25691
57658	CALCOCO1	12q13.13	0.667391	6.42267	6.19111	2.61228e-06	5.95695e-05	4.29904
5763	PTMS	12p13.31	0.738108	7.89548	6.18955	2.62193e-06	5.96548e-05	4.16068
114789	SLC25A25	9q34.11	-1.14644	4.57111	-6.15823	2.82415e-06	6.41113e-05	4.56675
196410	METTL7B	12q13.2	-2.40072	2.49489	-6.15061	2.87573e-06	6.5136e-05	4.676
57175	CORO1B	11q13.2	0.565016	7.90454	6.14725	2.89872e-06	6.55097e-05	4.05083
642273	FAM110C	2p25.3	0.823276	5.59536	6.14559	2.91023e-06	6.55396e-05	4.33244
10972	TMED10	14q24.3	-0.478391	9.11755	-6.14518	2.91302e-06	6.55396e-05	3.97084
54443	ANLN	7p14.2	-3.32833	4.61099	-6.13792	2.96371e-06	6.6532e-05	4.70041
83543	AIF1L	9q34.12-q34.13	0.567886	7.55556	6.13295	2.99893e-06	6.71733e-05	4.04994
7295	TXN	9q31.3	-0.624121	7.34375	-6.12471	3.05827e-06	6.8351e-05	4.04601
9319	TRIP13	5p15.33	-1.82605	4.04144	-6.12276	3.07247e-06	6.85168e-05	4.66411
85301	COL27A1	9q32	-1.29889	4.26298	-6.1095	3.17086e-06	7.05552e-05	4.49909
6748	SSR4	Xq28	-0.602288	7.98949	-6.10326	3.21832e-06	7.14538e-05	3.92703
3880	KRT19	17q21.2	-0.53707	11.0937	-6.09875	3.25305e-06	7.20665e-05	3.75382
80028	FBXL18	7p22.1	0.773804	5.80216	6.09766	3.26151e-06	7.20957e-05	4.17575
51741	WWOX	16q23.1-q23.2	0.66926	6.37646	6.09541	3.279e-06	7.23242e-05	4.07645
7043	TGFB3	14q24.3	1.19105	5.86879	6.09331	3.29547e-06	7.2529e-05	4.2168
23741	EID1	15q21.1	-0.568049	7.61405	-6.08145	3.38987e-06	7.44445e-05	3.88473
441027	TMEM150C	4q21.22	0.530113	7.92465	6.06078	3.56102e-06	7.79714e-05	3.84217
678	ZFP36L2	2p21	0.942744	8.80998	6.05974	3.56988e-06	7.79714e-05	3.76854
230	ALDOC	17q11.2	-1.30756	3.84198	-6.0593	3.57362e-06	7.79714e-05	4.47836
3251	HPRT1	Xq26.2-q26.3	-1.13811	4.91563	-6.04963	3.65705e-06	7.96197e-05	4.26197
84300	UQCC2	6p21.31	-1.1105	4.54156	-6.04114	3.7319e-06	8.09049e-05	4.3412
51651	PTRH2	17q23.1	-0.67274	5.74768	-6.04111	3.7321e-06	8.09049e-05	4.03814
57405	SPC25	2q24.3	-4.14982	1.31416	-6.0367	3.77166e-06	8.15873e-05	3.73886
4926	NUMA1	11q13.4	0.655907	8.62994	6.03373	3.79846e-06	8.19915e-05	3.73897
10327	AKR1A1	1p34.1	-0.658808	6.52302	-6.03226	3.81185e-06	8.21051e-05	3.92457
7074	TIAM1	21q22.11	-0.913398	5.61921	-6.03131	3.82046e-06	8.21156e-05	4.0486
10559	SLC35A1	6q15	1.01352	6.5114	6.02982	3.83404e-06	8.22324e-05	3.93121
1951	CELSR3	3p21.31	0.910814	5.35172	6.01166	4.00403e-06	8.55976e-05	4.11252
51474	LIMA1	12q13.12	0.709741	6.34412	6.01126	4.00789e-06	8.55976e-05	3.9055
708	C1QBP	17p13.2	-0.74324	6.29442	-6.00775	4.04165e-06	8.61366e-05	3.92042
64065	PERP	6q23.3	0.556231	8.892	6.00439	4.07423e-06	8.64762e-05	3.63978
10112	KIF20A	5q31.2	-3.60355	4.00229	-6.0037	4.08095e-06	8.64762e-05	4.21595
55008	HERC6	4q22.1	-1.79166	3.30341	-6.00347	4.08326e-06	8.64762e-05	4.40203
5782	PTPN12	7q11.23	0.623792	7.18283	6.0016	4.10154e-06	8.66815e-05	3.78171
6747	SSR3	3q25.31	-0.565266	7.55205	-5.99906	4.12654e-06	8.70277e-05	3.71997
6470	SHMT1	17p11.2	-0.933471	5.17541	-5.9956	4.1608e-06	8.75676e-05	4.09683
1201	CLN3	16p12.1	0.634799	6.86831	5.99107	4.20614e-06	8.83377e-05	3.7997
262	AMD1	6q21	-0.848879	5.51289	-5.99019	4.21494e-06	8.83388e-05	3.98609
25840	METTL7A	12q13.12	-2.79494	2.61789	-5.98805	4.23657e-06	8.86083e-05	4.20104
406991	MIR21	17q23.1	1.32859	3.77843	5.98225	4.2958e-06	8.96615e-05	4.22429
64781	CERK	22q13.31	0.71961	6.13934	5.97942	4.32496e-06	8.99342e-05	3.87147
79682	CENPU	4q35.1	-3.67294	3.42128	-5.97841	4.33544e-06	8.99342e-05	4.14267
1465	CSRP1	1q32.1	0.645224	8.25978	5.9784	4.33557e-06	8.99342e-05	3.60296
29127	RACGAP1	12q13.12	-1.58634	5.36997	-5.97714	4.34866e-06	9.00208e-05	4.19479
55197	RPRD1A	18q12.2	-0.608853	6.50606	-5.97062	4.41704e-06	9.12464e-05	3.77797
1408	CRY2	11p11.2	0.754539	5.72413	5.96978	4.42593e-06	9.12464e-05	3.89126
51430	SUCO	1q24.3	-0.601647	7.02123	-5.96707	4.45475e-06	9.16008e-05	3.70016
22974	TPX2	20q11.21	-1.2814	6.02106	-5.96646	4.46125e-06	9.16008e-05	4.05139
92291	CAPN13	2p23.1	1.04152	5.4688	5.95474	4.58829e-06	9.40181e-05	3.90786
4174	MCM5	22q12.3	-1.67818	4.38583	-5.94522	4.69415e-06	9.59925e-05	4.2153
23362	PSD3	8p22	0.886956	5.35549	5.94411	4.70664e-06	9.60534e-05	3.9081
6142	RPL18A	19p13.11	-0.54506	8.30678	-5.94107	4.74106e-06	9.65609e-05	3.52546
6627	SNRPA1	15q26.3	-0.732562	6.4762	-5.92831	4.8884e-06	9.93614e-05	3.70042
10576	CCT2	12q15	-0.478521	8.13074	-5.91843	5.00563e-06	0.00010154	3.46712
4277	MICB	6p21.33	-1.45455	3.39645	-5.914	5.05921e-06	0.000102338	4.12874
8318	CDC45	22q11.21	-3.36061	2.73603	-5.9135	5.06526e-06	0.000102338	3.8939
27092	CACNG4	17q24.2	0.529274	8.57014	5.91072	5.0992e-06	0.000102819	3.41211
147841	SPC24	19p13.2	-3.63441	2.39888	-5.90188	5.20848e-06	0.000104813	3.6315
2739	GLO1	6p21.2	-0.478088	8.07651	-5.88819	5.38268e-06	0.000108065	3.40315
25804	LSM4	19p13.11	-0.734845	5.93772	-5.88751	5.39146e-06	0.000108065	3.6763
126353	MISP	19p13.3	0.669901	6.56471	5.88596	5.41154e-06	0.000108252	3.55761
57669	EPB41L5	2q14.2	0.537773	7.83087	5.87694	5.53017e-06	0.000110285	3.39986
51287	COA4	11q13.4	-0.667741	6.4273	-5.87658	5.53497e-06	0.000110285	3.5633
57486	NLN	5q12.3	-0.742815	5.82	-5.87259	5.58833e-06	0.000111129	3.64739
22883	CLSTN1	1p36.22	0.560937	8.24903	5.87075	5.61305e-06	0.000111401	3.358
7184	HSP90B1	12q23.3	-0.442932	11.0949	-5.85858	5.77982e-06	0.000114486	3.19385
167227	DCP2	5q22.2	0.673465	6.84082	5.8572	5.79903e-06	0.000114642	3.45197
80119	PIF1	15q22.31	-3.83557	0.744905	-5.85454	5.83622e-06	0.000115151	3.18671
7371	UCK2	1q24.1	-0.789605	5.66841	-5.8473	5.93882e-06	0.000116947	3.64433
8507	ENC1	5q13.3	0.75781	5.34166	5.84084	6.03197e-06	0.00011855	3.65319
5111	PCNA	20p12.3	-0.829493	5.7205	-5.83941	6.05275e-06	0.000118728	3.58593
80324	PUS1	12q24.33	-1.05711	4.60696	-5.83287	6.14886e-06	0.000120379	3.8001
950	SCARB2	4q21.1	0.468457	9.13349	5.83062	6.18227e-06	0.000120799	3.21066
55872	PBK	8p21.1	-3.55867	2.63497	-5.82553	6.2585e-06	0.000122053	3.48933
219	ALDH1B1	9p13.1	-1.06891	4.30735	-5.82155	6.31873e-06	0.00012299	3.80349
171024	SYNPO2	4q26	-0.822503	6.71968	-5.81969	6.34715e-06	0.000123199	3.36022
90362	FAM110B	8q12.1	1.12088	4.15708	5.81901	6.35764e-06	0.000123199	3.87051
84340	GFM2	5q13.3	-0.677487	5.76461	-5.81846	6.36608e-06	0.000123199	3.52066
1984	EIF5A	17p13.1	-0.569384	7.90182	-5.81731	6.38361e-06	0.000123303	3.24766
1718	DHCR24	1p32.3	0.45295	9.25772	5.80922	6.50938e-06	0.000125431	3.14602
6229	RPS24	10q22.3	-0.602402	10.3977	-5.80804	6.52796e-06	0.000125431	3.09233
5799	PTPRN2	7q36.3	2.64778	3.13017	5.80784	6.53106e-06	0.000125431	3.95668
9076	CLDN1	3q28	1.75282	2.8179	5.80663	6.55011e-06	0.000125558	3.94235
9635	CLCA2	1p22.3	-1.08859	4.16264	-5.79995	6.65645e-06	0.000127207	3.64924
154141	MBOAT1	6p22.3	-0.835034	5.14007	-5.79965	6.66131e-06	0.000127207	3.56627
64762	GAREM1	18q12.1	1.00507	5.06256	5.79797	6.68841e-06	0.000127484	3.63551
2065	ERBB3	12q13.2	0.499612	9.95528	5.79083	6.80452e-06	0.000129453	3.07631
81855	SFXN3	10q24.31	-1.54235	3.60064	-5.78802	6.85088e-06	0.000130071	3.89088
6566	SLC16A1	1p13.2	-1.26673	3.8727	-5.7873	6.86279e-06	0.000130071	3.84623
64131	XYLT1	16p12.3	1.03945	4.74981	5.78526	6.89657e-06	0.000130467	3.64578
3730	ANOS1	Xp22.31	0.961797	4.59813	5.78103	6.96739e-06	0.000131443	3.68653
10056	FARSB	2q36.1	-0.82617	5.34702	-5.78063	6.9742e-06	0.000131443	3.51067
151246	SGO2	2q33.1	-2.34095	3.21853	-5.76096	7.31341e-06	0.00013756	3.81024
7379	UPK2	11q23.3	1.07815	4.29975	5.76025	7.32598e-06	0.00013756	3.64807
375056	MIA3	1q41	0.615966	6.91881	5.75775	7.37025e-06	0.000138134	3.20443
111	ADCY5	3q21.1	1.02811	5.34174	5.75111	7.48948e-06	0.000140109	3.42576
4288	MKI67	10q26.2	-3.58831	5.51062	-5.7492	7.52408e-06	0.000140314	3.81229
4085	MAD2L1	4q27	-2.20687	3.59342	-5.74897	7.52823e-06	0.000140314	3.81512
2034	EPAS1	2p21	1.02871	4.50112	5.74802	7.5457e-06	0.000140381	3.54211
220869	CBWD5	9q21.11	-1.23577	4.12311	-5.74602	7.58208e-06	0.000140798	3.69018
26011	TENM4	11q14.1	1.35276	4.63769	5.73656	7.75753e-06	0.000143792	3.5822
27202	C5AR2	19q13.32	-3.45578	1.47136	-5.73185	7.84641e-06	0.000145166	3.46925
4751	NEK2	1q32.3	-3.25757	2.43233	-5.73111	7.86039e-06	0.000145166	3.24237
29923	HILPDA	7q32.1	0.870517	5.9674	5.7237	8.0027e-06	0.000147524	3.26626
6723	SRM	1p36.22	-0.957607	5.50873	-5.7217	8.04153e-06	0.00014797	3.36076
3148	HMGB2	4q34.1	-1.01607	6.73753	-5.71969	8.08072e-06	0.000148421	3.29333
4649	MYO9A	15q23	0.765419	5.88674	5.7153	8.16701e-06	0.000149733	3.26034
10758	TRAF3IP2	6q21	-0.633182	6.15897	-5.71347	8.20323e-06	0.000150125	3.21723
374393	FAM111B	11q12.1	-3.82958	2.29941	-5.71152	8.24208e-06	0.000150563	3.2973
55796	MBNL3	Xq26.2	1.15484	4.73028	5.70714	8.32984e-06	0.000151892	3.52338
11130	ZWINT	10q21.1	-2.69169	4.21007	-5.70191	8.43595e-06	0.00015355	3.71537
57619	SHROOM3	4q21.1	0.654165	6.85774	5.69915	8.49257e-06	0.000154302	3.08661
5425	POLD2	7p13	-0.775487	5.95432	-5.6909	8.66401e-06	0.000157134	3.2243
283149	BCL9L	11q23.3	0.583985	8.55893	5.68973	8.68852e-06	0.000157296	2.89808
54892	NCAPG2	7q36.3	-1.37081	5.06749	-5.68694	8.74739e-06	0.000158079	3.49355
83461	CDCA3	12p13.31	-3.71006	2.83774	-5.68198	8.85329e-06	0.000159707	3.2205
57221	ARFGEF3	6q23.3-q24.1	0.709495	8.02918	5.6791	8.91526e-06	0.000160538	2.90815
5097	PCDH1	5q31.3	0.789911	6.58932	5.67435	9.01836e-06	0.000162106	3.07458
2222	FDFT1	8p23.1	-0.513824	7.15611	-5.66746	9.17023e-06	0.000164543	2.96383
58513	EPS15L1	19p13.11	-0.799117	5.67313	-5.6654	9.21631e-06	0.000165076	3.19045
64759	TNS3	7p12.3	1.19502	4.83417	5.66273	9.27605e-06	0.000165824	3.37291
4603	MYBL1	8q13.1	-3.96366	1.38857	-5.66141	9.30582e-06	0.000165824	3.13972
10460	TACC3	4p16.3	-2.23786	4.29849	-5.66134	9.30729e-06	0.000165824	3.62226
1387	CREBBP	16p13.3	0.593106	7.42605	5.65977	9.34299e-06	0.000166062	2.92304
55723	ASF1B	19p13.12	-2.25494	3.73602	-5.65872	9.36669e-06	0.000166062	3.61392
10198	MPHOSPH9	12q24.31	-0.982613	4.69773	-5.65858	9.36995e-06	0.000166062	3.3967
5347	PLK1	16p12.2	-2.6081	4.40986	-5.65689	9.40849e-06	0.000166453	3.60589
286467	FIRRE	Xq26.2	-1.83176	3.43805	-5.6532	9.49302e-06	0.000167655	3.59391
51514	DTL	1q32.3	-4.63463	1.74514	-5.64968	9.57428e-06	0.000168795	3.12426
23649	POLA2	11q13.1	-1.05771	4.6806	-5.64601	9.65995e-06	0.000170008	3.36115
284352	PPP1R37	19q13.32	0.640304	6.52909	5.63746	9.86251e-06	0.000173271	2.97588
9557	CHD1L	1q21.1	-0.550456	6.67693	-5.63253	9.98119e-06	0.000174875	2.92643
22941	SHANK2	11q13.3-q13.4	0.618848	6.81412	5.63224	9.98838e-06	0.000174875	2.91979
4088	SMAD3	15q22.33	0.581093	7.02361	5.62943	1.00566e-05	0.00017565	2.86341
2202	EFEMP1	2p16.1	0.85719	6.82365	5.62899	1.00674e-05	0.00017565	2.90948
23446	SLC44A1	9q31.1-q31.2	0.652195	7.23716	5.627	1.01161e-05	0.000176195	2.85645
81929	SEH1L	18p11.21	-0.698261	5.79552	-5.62254	1.02263e-05	0.000177751	3.05373
1997	ELF1	13q14.11	-0.536305	7.52907	-5.62196	1.02406e-05	0.000177751	2.78598
3667	IRS1	2q36.3	-0.680673	7.10319	-5.61601	1.03898e-05	0.000180031	2.8382
11004	KIF2C	1p34.1	-3.68582	3.92274	-5.61418	1.04361e-05	0.000180143	3.35542
55239	OGFOD1	16q13	-0.731291	5.57241	-5.61418	1.04362e-05	0.000180143	3.0636
25896	INTS7	1q32.3	-1.13382	3.91848	-5.61364	1.04498e-05	0.000180143	3.42323
27124	INPP5J	22q12.2	1.21457	5.08521	5.61081	1.05219e-05	0.000181077	3.25965
6217	RPS16	19q13.2	-0.495392	8.66724	-5.60571	1.06532e-05	0.000183025	2.68792
4072	EPCAM	2p21	0.500443	9.84401	5.60159	1.07604e-05	0.000184553	2.61279
5214	PFKP	10p15.2	-0.613635	7.40967	-5.60035	1.07929e-05	0.00018479	2.75902
5538	PPT1	1p34.2	0.549879	8.53576	5.59966	1.08108e-05	0.00018479	2.67778
146909	KIF18B	17q21.31	-3.81969	1.61053	-5.59821	1.08492e-05	0.000185103	2.96304
1604	CD55	1q32.2	0.569375	7.48888	5.59732	1.08727e-05	0.000185103	2.76379
195828	ZNF367	9q22.32	-3.61459	1.92485	-5.59689	1.08841e-05	0.000185103	3.03812
22984	PDCD11	10q24.33	-0.721424	5.87872	-5.59417	1.09562e-05	0.000185826	2.96941
6155	RPL27	17q21.31	-0.615027	8.23854	-5.59331	1.09791e-05	0.000185826	2.66846
1937	EEF1G	11q12.3	-0.393811	11.4307	-5.59213	1.10106e-05	0.000185826	2.5231
23306	NEMP1	12q13.3	-1.25636	4.37278	-5.59201	1.10137e-05	0.000185826	3.33972
1138	CHRNA5	15q25.1	-1.94297	2.97834	-5.59164	1.10238e-05	0.000185826	3.46273
10383	TUBB4B	9q34.3	-0.720126	7.38659	-5.59115	1.1037e-05	0.000185826	2.76062
55841	WWC3	Xp22.2	0.696457	7.00265	5.58297	1.12587e-05	0.000189244	2.77576
498	ATP5F1A	18q21.1	-0.439089	8.79178	-5.58222	1.12792e-05	0.000189273	2.61415
4267	CD99	Xp22.33	-0.486901	7.79557	-5.57732	1.14145e-05	0.000191226	2.68212
57558	USP35	11q14.1	-1.07123	4.04359	-5.57225	1.1556e-05	0.000193277	3.22218
1869	E2F1	20q11.22	-2.6432	3.42705	-5.56489	1.1765e-05	0.000196341	3.3826
4982	TNFRSF11B	8q24.12	1.36192	3.04504	5.56417	1.17854e-05	0.000196341	3.35479
100507246	SNHG16	17q25.1	-0.552214	7.0526	-5.56375	1.17976e-05	0.000196341	2.7093
3887	KRT81	12q13.13	1.44894	3.22238	5.56161	1.18594e-05	0.000197045	3.34632
10574	CCT7	2p13.2	-0.437006	8.4322	-5.5603	1.18971e-05	0.000197175	2.57329
9612	NCOR2	12q24.31	0.688449	7.55334	5.55998	1.19063e-05	0.000197175	2.6736
23541	SEC14L2	22q12.2	-1.32269	3.0354	-5.5553	1.20428e-05	0.00019911	3.34123
5445	PON2	7q21.3	-1.01021	4.63962	-5.5506	1.21813e-05	0.000200696	3.10185
57820	CCNB1IP1	14q11.2	-1.0279	4.45959	-5.55016	1.21945e-05	0.000200696	3.19273
57826	RAP2C	Xq26.2	-0.859044	8.80615	-5.55003	1.21983e-05	0.000200696	2.5339
2934	GSN	9q33.2	-0.471935	7.18573	-5.5448	1.23548e-05	0.00020294	2.58778
5493	PPL	16p13.3	0.506284	7.5774	5.54413	1.23749e-05	0.00020294	2.58729
26018	LRIG1	3p14.1	-0.708648	5.77651	-5.53952	1.25145e-05	0.000204897	2.86983
150465	TTL	2q14.1	-0.776698	5.25788	-5.53751	1.2576e-05	0.000205571	2.92427
9663	LPIN2	18p11.31	0.760476	6.55631	5.53135	1.27661e-05	0.000208341	2.71771
103910	MYL12B	18p11.31	0.472555	10.5974	5.52969	1.28181e-05	0.000208852	2.39631
57655	GRAMD1A	19q13.11	0.756334	6.61386	5.52748	1.28871e-05	0.000209639	2.68526
6513	SLC2A1	1p34.2	-0.779324	6.16715	-5.51883	1.31617e-05	0.000213514	2.69488
8942	KYNU	2q22.2	0.573863	8.13776	5.51831	1.31786e-05	0.000213514	2.4846
125061	AFMID	17q25.3	-0.940623	4.44545	-5.51799	1.31888e-05	0.000213514	3.09058
10615	SPAG5	17q11.2	-2.04596	4.27681	-5.51723	1.32132e-05	0.000213567	3.28569
10419	PRMT5	14q11.2	-0.670736	5.91289	-5.51316	1.33448e-05	0.000215351	2.7723
9545	RAB3D	19p13.2	0.488893	8.25742	5.50787	1.35182e-05	0.000217692	2.46934
220042	DDIAS	11q14.1	-4.24863	1.88292	-5.50742	1.3533e-05	0.000217692	2.85241
257397	TAB3	Xp21.2	0.760381	6.36285	5.4923	1.40416e-05	0.000225513	2.62503
2177	FANCD2	3p25.3	-1.5448	4.72328	-5.48949	1.41382e-05	0.00022662	3.10656
84629	TNRC18	7p22.1	0.526863	8.25607	5.48899	1.41553e-05	0.00022662	2.42863
1678	TIMM8A	Xq22.1	-1.12058	4.09646	-5.48798	1.41904e-05	0.000226686	3.05686
9135	RABEP1	17p13.2	-0.659406	6.93465	-5.48757	1.42043e-05	0.000226686	2.53347
23594	ORC6	16q11.2	-3.40568	1.94395	-5.48141	1.44197e-05	0.00022948	2.78183
87178	PNPT1	2p16.1	-0.741235	5.40978	-5.48126	1.44249e-05	0.00022948	2.76124
84798	C19orf48	19q13.33	-0.648218	6.31398	-5.47864	1.45175e-05	0.000230591	2.64592
701	BUB1B	15q15.1	-3.18762	2.94923	-5.47608	1.46086e-05	0.000231166	2.98635
3925	STMN1	1p36.11	-1.01729	6.41217	-5.47602	1.46108e-05	0.000231166	2.72067
8850	KAT2B	3p24.3	0.871599	5.40078	5.47569	1.46224e-05	0.000231166	2.78745
292	SLC25A5	Xq24	-0.492194	8.51884	-5.47369	1.46939e-05	0.000231934	2.36837
4173	MCM4	8q11.21	-0.832266	6.33349	-5.47188	1.4759e-05	0.000232598	2.64065
51203	NUSAP1	15q15.1	-3.0857	4.19459	-5.47085	1.47961e-05	0.000232819	3.17479
3726	JUNB	19p13.13	0.742881	6.29987	5.46545	1.49926e-05	0.000235544	2.55874
26986	PABPC1	8q22.3	0.453176	11.5863	5.46242	1.51039e-05	0.000236925	2.201
6168	RPL37A	2q35	-0.538556	9.6653	-5.46018	1.5187e-05	0.000237859	2.2756
740	MRPL49	11q13.1	-0.489759	7.12329	-5.45071	1.55424e-05	0.000242875	2.42333
22982	DIP2C	10p15.3	0.533547	6.56125	5.45037	1.55553e-05	0.000242875	2.50534
51015	ISOC1	5q23.3	-0.864115	5.70261	-5.44476	1.57699e-05	0.000245846	2.62095
64432	MRPS25	3p25.1	-0.624932	6.18172	-5.44253	1.58561e-05	0.000246808	2.5321
1119	CHKA	11q13.2	0.598881	6.10646	5.43582	1.61185e-05	0.000250506	2.55491
9424	KCNK6	19q13.2	-0.609258	5.591	-5.43166	1.62832e-05	0.00025254	2.57579
2975	GTF3C1	16p12.1	0.490212	7.9507	5.43051	1.6329e-05	0.00025254	2.29989
154313	CFAP206	6q15	1.19669	3.67363	5.43037	1.63347e-05	0.00025254	2.99048
2049	EPHB3	3q27.1	0.671018	5.71416	5.43	1.63494e-05	0.00025254	2.59036
5618	PRLR	5p13.2	-0.526766	8.21574	-5.42897	1.63907e-05	0.000252792	2.27608
7020	TFAP2A	6p24.3	0.734729	5.91058	5.4173	1.68653e-05	0.000259715	2.51926
55226	NAT10	11p13	-0.605023	6.24163	-5.41634	1.69047e-05	0.000259925	2.47444
3376	IARS	9q22.31	-0.522067	8.02212	-5.4094	1.71944e-05	0.000263979	2.26722
4801	NFYB	12q23.3	0.750465	5.91952	5.40604	1.73362e-05	0.000265751	2.53385
23761	PISD	22q12.2	-0.831126	6.34454	-5.39235	1.79269e-05	0.00027439	2.38054
4798	NFRKB	11q24.3	0.670769	6.11087	5.38795	1.8121e-05	0.000276942	2.42801
5230	PGK1	Xq21.1	-0.426151	9.14912	-5.38702	1.81625e-05	0.000277006	2.12029
64087	MCCC2	5q13.2	-0.516131	9.14183	-5.38663	1.818e-05	0.000277006	2.10715
91768	CABLES1	18q11.2	0.705324	6.00133	5.38275	1.83534e-05	0.000279225	2.47212
10014	HDAC5	17q21.31	0.872365	5.0041	5.37208	1.88396e-05	0.000286191	2.63578
24137	KIF4A	Xq13.1	-3.22034	4.16241	-5.37032	1.89208e-05	0.000286993	2.93431
23047	PDS5B	13q13.1	0.802278	5.94748	5.36873	1.89948e-05	0.000287685	2.39602
54470	ARMCX6	Xq22.1	-1.13319	4.31919	-5.36694	1.90779e-05	0.000287941	2.74317
57674	RNF213	17q25.3	0.53763	7.34543	5.36694	1.9078e-05	0.000287941	2.1933
84662	GLIS2	16p13.3	0.890533	5.42289	5.36653	1.90973e-05	0.000287941	2.52524
23621	BACE1	11q23.3	0.595604	6.45427	5.36587	1.91283e-05	0.000287979	2.30085
3556	IL1RAP	3q28	-1.67829	2.82935	-5.36223	1.92997e-05	0.000290128	2.9354
7088	TLE1	9q21.32	0.739655	7.25512	5.35958	1.94253e-05	0.000291581	2.21097
55619	DOCK10	2q36.2	-1.47993	2.90269	-5.35505	1.96423e-05	0.000294402	2.86977
64858	DCLRE1B	1p13.2	-0.74825	6.34973	-5.35326	1.97287e-05	0.000295258	2.30353
57214	CEMIP	15q25.1	1.29225	3.82916	5.34944	1.99142e-05	0.000297589	2.73283
51655	RASD1	17p11.2	1.4544	3.51938	5.34884	1.99434e-05	0.000297589	2.83025
10130	PDIA6	2p25.1	-0.466106	8.82374	-5.34662	2.00522e-05	0.000298772	2.041
1318	SLC31A2	9q32	0.877089	4.07938	5.33824	2.04686e-05	0.000304527	2.60347
2627	GATA6	18q11.2	1.04907	3.75551	5.32591	2.10973e-05	0.000313419	2.70923
126410	CYP4F22	19p13.12	-3.35864	2.72531	-5.3241	2.11911e-05	0.000314351	2.81456
79075	DSCC1	8q24.12	-3.49697	1.83408	-5.32219	2.12904e-05	0.00031536	2.48672
64802	NMNAT1	1p36.22	-0.846414	4.47816	-5.31179	2.18411e-05	0.000323044	2.55781
54431	DNAJC10	2q32.1	-0.552207	6.98855	-5.30097	2.24289e-05	0.000331253	2.0962
6491	STIL	1p33	-2.26113	3.70725	-5.29433	2.27975e-05	0.000336206	2.78108
64097	EPB41L4A	5q22.1-q22.2	0.854987	4.77413	5.2925	2.29003e-05	0.000337229	2.42659
57491	AHRR	5p15.33	1.48773	3.23067	5.28976	2.30548e-05	0.000338718	2.73813
10397	NDRG1	8q24.22	0.716477	5.59015	5.28952	2.30685e-05	0.000338718	2.30469
200916	RPL22L1	3q26.2	-0.853398	5.85131	-5.28129	2.35393e-05	0.000345129	2.12786
89944	GLB1L2	11q25	-1.00692	4.50993	-5.28062	2.35779e-05	0.000345195	2.46704
25805	BAMBI	10p12.1	0.524174	8.7477	5.27819	2.37192e-05	0.00034676	1.86866
334	APLP2	11q24.3	0.374104	10.4792	5.27507	2.3902e-05	0.000348928	1.77681
7791	ZYX	7q34	0.619165	6.26568	5.27285	2.40327e-05	0.000350329	2.08756
8754	ADAM9	8p11.22	0.546003	7.42512	5.2655	2.44706e-05	0.000356199	1.93591
9824	ARHGAP11A	15q13.3	-2.23632	4.16318	-5.26325	2.46065e-05	0.000357661	2.70682
9351	SLC9A3R2	16p13.3	0.448608	7.86978	5.25821	2.4913e-05	0.000361596	1.88309
2305	FOXM1	12p13.33	-2.19647	4.3864	-5.25247	2.52673e-05	0.000366212	2.66959
735301	SNHG9	16p13.3	-0.862393	4.86995	-5.25093	2.53631e-05	0.000367075	2.30835
7425	VGF	7q22.1	-1.23224	3.6113	-5.24823	2.55319e-05	0.000368635	2.54462
3487	IGFBP4	17q21.2	-0.539174	8.49601	-5.24804	2.55439e-05	0.000368635	1.80055
5476	CTSA	20q13.12	0.48604	9.0803	5.24591	2.56782e-05	0.000370044	1.76305
8751	ADAM15	1q21.3	-0.564284	7.45861	-5.24299	2.58633e-05	0.000372181	1.89275
51566	ARMCX3	Xq22.1	-0.517733	6.92876	-5.24211	2.59189e-05	0.00037245	1.90963
64771	C6orf106	6p21.31	-0.59714	9.3882	-5.23946	2.60886e-05	0.000374357	1.73976
64067	NPAS3	14q13.1	1.59361	3.07255	5.23829	2.61639e-05	0.000374559	2.62099
51706	CYB5R1	1q32.1	0.650905	7.01836	5.23809	2.61768e-05	0.000374559	1.90451
51645	PPIL1	6p21.2	-0.748602	5.28816	-5.23685	2.6257e-05	0.000375174	2.20798
205	AK4	1p31.3	-0.524179	6.72799	-5.23483	2.63877e-05	0.00037651	1.94398
51659	GINS2	16q24.1	-1.82506	4.46719	-5.22911	2.67612e-05	0.0003813	2.5216
2889	RAPGEF1	9q34.13	0.572946	6.42645	5.22468	2.7055e-05	0.000384943	1.9792
1736	DKC1	Xq28	-0.585588	7.13142	-5.2231	2.716e-05	0.000385894	1.87825
9088	PKMYT1	16p13.3	-2.71396	3.52716	-5.21663	2.75963e-05	0.000391507	2.55359
57142	RTN4	2p16.1	-0.493781	6.91927	-5.21609	2.76326e-05	0.000391507	1.86771
25994	HIGD1A	3p22.1	-0.577875	5.93944	-5.21165	2.79361e-05	0.000395252	1.98417
9066	SYT7	11q12.2	0.50042	7.32063	5.2086	2.81468e-05	0.000397677	1.8004
8976	WASL	7q31.32	0.684455	6.26267	5.20756	2.82187e-05	0.000398136	1.93423
347	APOD	3q29	1.65515	2.64662	5.2049	2.84041e-05	0.000399672	2.52584
9143	SYNGR3	16p13.3	1.24892	4.21606	5.20487	2.84067e-05	0.000399672	2.37908
79789	CLMN	14q32.13	0.6456	5.97258	5.19989	2.87571e-05	0.000402849	1.98115
23450	SF3B3	16q22.1	-0.44959	9.03761	-5.1995	2.87843e-05	0.000402849	1.66214
91862	MARVELD3	16q22.2	0.66034	5.77374	5.19942	2.87902e-05	0.000402849	2.01161
51434	ANAPC7	12q24.11	-0.783493	5.82491	-5.19922	2.88044e-05	0.000402849	2.00265
197259	MLKL	16q23.1	-1.34612	3.31081	-5.19883	2.88319e-05	0.000402849	2.52764
399694	SHC4	15q21.1	-1.91808	2.76286	-5.19753	2.89242e-05	0.000403581	2.42797
6383	SDC2	8q22.1	-1.07026	3.75766	-5.1962	2.90197e-05	0.000404355	2.40961
3691	ITGB4	17q25.1	0.522254	7.59234	5.19501	2.91047e-05	0.00040498	1.75654
84937	ZNRF1	16q23.1	-0.587042	6.51682	-5.19292	2.92551e-05	0.000406513	1.8737
9787	DLGAP5	14q22.3	-4.30406	2.93322	-5.19149	2.93576e-05	0.000407377	2.23716
57282	SLC4A10	2q24.2	-4.09797	3.66213	-5.18804	2.96085e-05	0.000410281	2.5299
84919	PPP1R15B	1q32.1	0.48684	7.93145	5.18678	2.97009e-05	0.000410281	1.69134
1434	CSE1L	20q13.13	-0.510974	7.50906	-5.18673	2.97039e-05	0.000410281	1.74122
130574	LYPD6	2q23.2	-1.16233	4.28745	-5.18639	2.97293e-05	0.000410281	2.30269
2296	FOXC1	6p25.3	-1.03724	3.93625	-5.18542	2.97999e-05	0.000410418	2.29816
9813	EFCAB14	1p33	0.486401	7.69902	5.18514	2.98205e-05	0.000410418	1.70916
64793	CEP85	1p36.11	-1.15724	4.26789	-5.18323	2.9961e-05	0.000411791	2.35782
51602	NOP58	2q33.1	-0.532595	6.73898	-5.18055	3.01597e-05	0.000413958	1.81618
824	CAPN2	1q41	-0.627968	6.57949	-5.17916	3.02633e-05	0.000414817	1.81648
6191	RPS4X	Xq13.1	-0.461125	10.466	-5.17448	3.06144e-05	0.00041906	1.52901
51330	TNFRSF12A	16p13.3	0.664244	7.50126	5.17225	3.07827e-05	0.000420794	1.66294
3625	INHBB	2q14.2	0.644739	6.22455	5.17008	3.09481e-05	0.000422178	1.8539
8884	SLC5A6	2p23.3	0.446659	7.27949	5.16982	3.09675e-05	0.000422178	1.69823
28996	HIPK2	7q34	0.484786	6.81983	5.16708	3.11777e-05	0.000424236	1.74127
51154	MRTO4	1p36.13	-0.657449	6.04136	-5.16676	3.12025e-05	0.000424236	1.87729
84296	GINS4	8p11.21	-1.92048	2.69712	-5.16405	3.14111e-05	0.000426437	2.48051
27198	HCAR1	12q24.31	1.2149	4.14223	5.16357	3.14488e-05	0.000426437	2.33472
1827	RCAN1	21q22.12	1.24184	4.59188	5.15866	3.18311e-05	0.000431042	2.11606
162	AP1B1	22q12.2	-0.524994	7.66401	-5.15731	3.19373e-05	0.00043138	1.64587
10087	COL4A3BP	5q13.3	0.673386	5.77188	5.15726	3.19414e-05	0.00043138	1.9379
4137	MAPT	17q21.31	-0.670338	5.37453	-5.15653	3.19988e-05	0.000431578	1.97902
283551	LINC01588	14q21.3	-1.86938	2.35115	-5.15264	3.23074e-05	0.000435159	2.45372
55165	CEP55	10q23.33	-3.77217	3.3012	-5.14954	3.25551e-05	0.000437912	2.28591
79624	ARMT1	6q25.1	-0.532516	9.09342	-5.14518	3.2907e-05	0.000441531	1.53167
9212	AURKB	17p13.1	-4.39056	2.02121	-5.14512	3.29116e-05	0.000441531	2.09931
63874	ABHD4	14q11.2	0.907644	4.32392	5.14271	3.31079e-05	0.000443576	2.17824
7342	UBP1	3p22.3	0.634078	7.9397	5.13222	3.39761e-05	0.000454145	1.55197
3140	MR1	1q25.3	-0.879989	4.34436	-5.13209	3.39867e-05	0.000454145	2.13292
84126	ATRIP	3p21.31	-1.10948	3.72697	-5.1314	3.40446e-05	0.000454318	2.25415
84270	CARD19	9q22.31	-1.03661	3.76611	-5.12875	3.42684e-05	0.0004567	2.22656
55922	NKRF	Xq24	-0.634132	5.21495	-5.12612	3.44906e-05	0.000459057	1.94129
9568	GABBR2	9q22.33	3.14883	1.71605	5.12333	3.47294e-05	0.000461627	2.37668
55143	CDCA8	1p34.3	-2.75776	3.65651	-5.12259	3.4793e-05	0.000461865	2.346
7263	TST	22q12.3	-0.744161	5.1654	-5.12169	3.48701e-05	0.000462281	1.92341
92610	TIFA	4q25	-1.49256	3.57207	-5.12038	3.4983e-05	0.000463169	2.31126
142	PARP1	1q42.12	-0.534991	6.93594	-5.118	3.51893e-05	0.000465052	1.63326
6692	SPINT1	15q15.1	0.475504	8.15645	5.11767	3.52173e-05	0.000465052	1.49982
463	ZFHX3	16q22.2-q22.3	0.579111	6.5771	5.1171	3.52669e-05	0.0004651	1.6875
3720	JARID2	6p22.3	-0.607712	6.21763	-5.116	3.53631e-05	0.00046576	1.75757
57178	ZMIZ1	10q22.3	0.505324	7.6979	5.11059	3.5838e-05	0.000471401	1.52523
8322	FZD4	11q14.2	0.778344	7.05853	5.10881	3.59962e-05	0.000472865	1.6585
151354	FAM84A	2p24.3	0.845361	4.66096	5.10425	3.64038e-05	0.000476854	1.95843
6227	RPS21	20q13.33	-0.548372	8.60399	-5.10413	3.64148e-05	0.000476854	1.44949
57007	ACKR3	2q37.3	0.577046	7.12185	5.10383	3.64414e-05	0.000476854	1.53549
53917	RAB24	5q35.3	0.763067	5.91922	5.0953	3.72171e-05	0.000486374	1.75289
987	LRBA	4q31.3	0.48952	8.37813	5.08959	3.77456e-05	0.000492644	1.41706
9919	SEC16A	9q34.3	0.41516	8.66215	5.07937	3.87102e-05	0.000504581	1.38215
128239	IQGAP3	1q22	-3.93375	3.47401	-5.07817	3.88248e-05	0.000505125	2.07983
51337	THEM6	8q24.3	0.643007	6.55454	5.07741	3.88977e-05	0.000505125	1.5791
149563	SRARP	1p36.13	1.44934	2.86694	5.07737	3.89019e-05	0.000505125	2.25971
10499	NCOA2	8q13.3	0.600025	6.18988	5.07658	3.89779e-05	0.000505462	1.64959
9886	RHOBTB1	10q21.2	-1.0224	4.46474	-5.07385	3.92419e-05	0.000508233	2.00797
56904	SH3GLB2	9q34.11	0.607185	7.81196	5.07297	3.9327e-05	0.000508683	1.42405
3099	HK2	2p12	0.536254	6.95064	5.06719	3.98929e-05	0.000514711	1.50259
3014	H2AFX	11q23.3	-0.855878	6.2368	-5.06717	3.98949e-05	0.000514711	1.70433
6147	RPL23A	17q11.2	-0.441426	9.62871	-5.0658	4.00293e-05	0.000515786	1.30056
928	CD9	12p13.31	0.428023	8.8071	5.05919	4.06892e-05	0.00052362	1.3255
114569	MAL2	8q24.12	0.536348	8.58965	5.05782	4.08272e-05	0.000524728	1.34235
63967	CLSPN	1p34.3	-2.03769	2.87984	-5.05416	4.11977e-05	0.000528817	2.22951
10635	RAD51AP1	12p13.32	-3.41446	1.4557	-5.03958	4.271e-05	0.000547534	1.84289
9266	CYTH2	19q13.33	0.528838	6.93473	5.03053	4.36759e-05	0.000559207	1.41702
64651	CSRNP1	3p22.2	0.69711	4.83578	5.02509	4.42677e-05	0.000566066	1.75183
56942	CMC2	16q23.2	-0.725756	5.42038	-5.02288	4.45095e-05	0.000568439	1.67166
699	BUB1	2q13	-3.636	3.44599	-5.02173	4.46368e-05	0.000568709	2.04552
150776	LOC150776	2q21.1	-0.895244	4.69933	-5.02167	4.46433e-05	0.000568709	1.81356
284207	METRNL	17q25.3	0.643029	6.98045	5.02068	4.47525e-05	0.000569383	1.38364
1033	CDKN3	14q22.2	-2.72217	2.63061	-5.01998	4.48299e-05	0.00056965	2.0069
6175	RPLP0	12q24.23	-0.358956	10.9943	-5.01845	4.50005e-05	0.000570695	1.12623
4998	ORC1	1p32.3	-3.07294	1.9389	-5.01787	4.50655e-05	0.000570695	1.89425
6324	SCN1B	19q13.11	0.939293	4.10388	5.01757	4.50984e-05	0.000570695	1.8579
11315	PARK7	1p36.23	-0.529119	7.23199	-5.01702	4.51602e-05	0.000570695	1.33616
8000	PSCA	8q24.3	2.57253	2.45389	5.01637	4.52323e-05	0.000570695	2.14251
891	CCNB1	5q13.2	-1.3474	5.49723	-5.0162	4.52511e-05	0.000570695	1.87043
23028	KDM1A	1p36.12	-0.447919	7.31406	-5.01148	4.57831e-05	0.000576684	1.32662
92558	BICDL1	12q24.23	0.7055	4.84483	5.0109	4.58484e-05	0.000576787	1.6916
6941	TCF19	6p21.33	-2.41636	3.10657	-5.00171	4.69028e-05	0.000589319	2.08627
79019	CENPM	22q13.2	-3.35176	2.00817	-5.00116	4.69671e-05	0.000589393	1.80559
51400	PPME1	11q13.4	-0.680454	5.60915	-4.99865	4.72601e-05	0.000592334	1.56068
3801	KIFC3	16q21	1.49761	3.87843	4.99417	4.77861e-05	0.000598146	1.92464
51114	ZDHHC9	Xq26.1	-0.434491	6.98824	-4.9937	4.78422e-05	0.000598146	1.29794
22949	PTGR1	9q31.3	-0.645895	5.65104	-4.99293	4.79336e-05	0.000598547	1.519
641	BLM	15q26.1	-2.04598	2.92369	-4.99177	4.80709e-05	0.000599522	2.08463
4147	MATN2	8q22.1-q22.2	0.875712	5.98128	4.98731	4.8605e-05	0.000605435	1.41288
80149	ZC3H12A	1p34.3	0.764717	5.36621	4.98315	4.91077e-05	0.000610943	1.53806
10926	DBF4	7q21.12	-1.20726	4.13096	-4.97441	5.01818e-05	0.000623539	1.92206
29121	CLEC2D	12p13.31	1.59176	3.86568	4.97171	5.05176e-05	0.000626939	1.88708
150678	COPS9	2q37.3	-0.853136	5.08699	-4.97072	5.06425e-05	0.00062704	1.56766
2956	MSH6	2p16.3	-0.503042	7.21179	-4.97066	5.06498e-05	0.00062704	1.23706
57136	APMAP	20p11.21	0.402066	8.94092	4.96897	5.08623e-05	0.0006289	1.09662
28969	BZW2	7p21.1	-0.476243	6.78735	-4.9653	5.1326e-05	0.000633858	1.26013
5062	PAK2	3q29	0.387849	9.55876	4.96417	5.14695e-05	0.000634853	1.04439
7267	TTC3	21q22.13	0.440429	9.44316	4.95991	5.20164e-05	0.000640816	1.04615
64769	MEAF6	1p34.3	0.584183	7.21235	4.95579	5.25488e-05	0.000646587	1.20251
2189	FANCG	9p13.3	-1.05593	4.132	-4.95485	5.26723e-05	0.000647318	1.83078
5373	PMM2	16p13.2	-0.513188	6.47472	-4.95339	5.28627e-05	0.000648869	1.27222
9209	LRRFIP2	3p22.2	-0.712143	4.77918	-4.95205	5.30389e-05	0.00065011	1.60319
6144	RPL21	13q12.2	-0.542608	9.58071	-4.95164	5.30925e-05	0.00065011	1.01942
65250	CPLANE1	5p13.2	0.93984	4.35996	4.95065	5.32226e-05	0.000650914	1.66042
26090	ABHD12	20p11.21	0.535845	6.715	4.94884	5.34621e-05	0.000653052	1.24493
473	RERE	1p36.23	0.510925	6.75446	4.94629	5.38004e-05	0.000656391	1.25646
23404	EXOSC2	9q34.12	-0.732747	4.80551	-4.94532	5.39304e-05	0.000657183	1.62258
9367	RAB9A	Xp22.2	0.547166	5.84136	4.94246	5.43129e-05	0.000661047	1.36916
11169	WDHD1	14q22.2-q22.3	-1.65276	3.74093	-4.94155	5.44361e-05	0.000661749	1.91197
983	CDK1	10q21.2	-2.35112	4.2534	-4.93987	5.46626e-05	0.000663704	1.95609
6132	RPL8	8q24.3	-0.395358	10.5203	-4.93598	5.51918e-05	0.000669325	0.940435
1870	E2F2	1p36.12	-2.39689	2.84556	-4.9294	5.60995e-05	0.000679517	1.92637
3760	KCNJ3	2q24.1	1.20513	4.4379	4.92861	5.62099e-05	0.000680038	1.65427
9448	MAP4K4	2q11.2	0.516368	6.92825	4.92763	5.63459e-05	0.000680868	1.11441
51021	MRPS16	10q22.2	-0.499025	6.69407	-4.92524	5.66811e-05	0.000684101	1.18422
9928	KIF14	1q32.1	-3.62301	2.94892	-4.92224	5.71038e-05	0.000688381	1.68669
51524	TMEM138	11q12.2	-0.902151	4.47532	-4.91834	5.76583e-05	0.000694236	1.59675
55222	LRRC20	10q22.1	-1.1068	3.41333	-4.91749	5.77803e-05	0.000694877	1.79397
4736	RPL10A	6p21.31	-0.415882	9.29511	-4.91383	5.83063e-05	0.000700369	0.938722
55727	BTBD7	14q32.12	0.638465	5.98346	4.91327	5.83878e-05	0.000700514	1.2666
51035	UBXN1	11q12.3	0.527938	6.85115	4.91012	5.88446e-05	0.000705158	1.14087
302	ANXA2	15q22.2	0.523191	8.02762	4.90957	5.89261e-05	0.000705297	0.963224
4642	MYO1D	17q11.2	0.491973	6.90277	4.90637	5.93945e-05	0.000709325	1.12575
10380	BPNT1	1q41	-0.675795	5.1121	-4.90631	5.9403e-05	0.000709325	1.41952
9693	RAPGEF2	4q32.1	0.679921	5.67121	4.9058	5.94792e-05	0.000709397	1.29227
5863	RGL2	6p21.32	0.45918	8.12355	4.90303	5.98883e-05	0.000712832	0.970991
7171	TPM4	19p13.12-p13.11	0.485685	9.01984	4.9029	5.99084e-05	0.000712832	0.923948
490	ATP2B1	12q21.33	0.49411	8.02666	4.90146	6.01221e-05	0.000714533	0.97453
3735	KARS	16q23.1	-0.408298	7.84465	-4.89499	6.10942e-05	0.000725233	0.98443
1503	CTPS1	1p34.2	-0.831952	5.14283	-4.88883	6.20343e-05	0.000735529	1.3565
79977	GRHL2	8q22.3	-0.567772	7.28679	-4.88326	6.28971e-05	0.000743019	1.00761
23180	RFTN1	3p24.3	1.80819	2.3816	4.88314	6.29163e-05	0.000743019	1.83681
4665	NAB2	12q13.3	-0.614106	5.89346	-4.88283	6.29643e-05	0.000743019	1.19681
5721	PSME2	14q12	-0.581296	6.72415	-4.8823	6.30477e-05	0.000743019	1.07785
340526	RTL5	Xq13.1	1.22798	2.75763	4.88199	6.30958e-05	0.000743019	1.75299
5478	PPIA	7p13	-0.411882	9.93169	-4.88192	6.31073e-05	0.000743019	0.83137
55646	LYAR	4p16.3	-1.13533	3.95427	-4.87732	6.38305e-05	0.000750659	1.67022
8878	SQSTM1	5q35.3	0.457685	8.84262	4.87625	6.40006e-05	0.000751783	0.863109
84154	RPF2	6q21	-0.768878	4.83151	-4.87212	6.46588e-05	0.000758633	1.42994
56992	KIF15	3p21.31	-4.00937	2.34572	-4.87131	6.47898e-05	0.000759288	1.56905
83540	NUF2	1q23.3	-4.35763	2.01258	-4.86904	6.51556e-05	0.00076269	1.5147
10957	PNRC1	6q15	0.796237	5.63184	4.86581	6.56795e-05	0.000767934	1.20629
6122	RPL3	22q13.1	-0.366024	10.8291	-4.86473	6.58554e-05	0.0007691	0.743959
84941	HSH2D	19p13.11	-0.882762	3.81136	-4.8621	6.62871e-05	0.000773248	1.51251
1948	EFNB2	13q33.3	1.38848	4.05866	4.85902	6.67955e-05	0.000778279	1.61135
4756	NEO1	15q24.1	0.495911	7.33515	4.85759	6.70321e-05	0.000780136	0.948652
7286	TUFT1	1q21.3	0.549869	6.24519	4.85529	6.74154e-05	0.000783695	1.08497
2491	CENPI	Xq22.1	-4.30077	1.70589	-4.85385	6.7657e-05	0.000785599	1.52062
9630	GNA14	9q21.2	-1.67312	2.74537	-4.85051	6.82206e-05	0.000791233	1.74115
6636	SNRPF	12q23.1	-0.744533	6.00564	-4.84428	6.92839e-05	0.000802644	1.11694
90381	TICRR	15q26.1	-3.65012	2.69389	-4.84184	6.97046e-05	0.000806593	1.53086
55635	DEPDC1	1p31.3	-3.47073	2.34931	-4.83988	7.00441e-05	0.000809595	1.46912
2683	B4GALT1	9p21.1	0.543057	7.12673	4.8386	7.02663e-05	0.000811235	0.931134
100093630	SNHG8	4q26	-0.697719	5.55452	-4.83699	7.05474e-05	0.00081355	1.15727
51143	DYNC1LI1	3p22.3	0.661456	5.52009	4.8251	7.26613e-05	0.000836972	1.1652
506	ATP5F1B	12q13.3	-0.393386	9.58119	-4.82383	7.28911e-05	0.000837368	0.706648
1514	CTSL	9q21.33	0.623899	6.22394	4.82371	7.29125e-05	0.000837368	1.00179
54532	USP53	4q26	0.612995	5.56289	4.82353	7.29444e-05	0.000837368	1.11631
7272	TTK	6q14.1	-3.66779	2.74527	-4.82255	7.31219e-05	0.000838453	1.49284
10483	SEC23B	20p11.23	-0.437309	7.57141	-4.81881	7.38054e-05	0.000845331	0.821284
202333	CMYA5	5q14.1	0.790293	5.05534	4.8174	7.40641e-05	0.000846681	1.22309
10714	POLD3	11q13.4	-0.884003	4.46356	-4.81725	7.40909e-05	0.000846681	1.40279
57610	RANBP10	16q22.1	0.512644	6.35377	4.81551	7.44127e-05	0.000849398	0.974924
23160	WDR43	2p23.2	-0.509049	6.48787	-4.81286	7.49035e-05	0.000854035	0.919338
222584	FAM83B	6p12.1	0.582951	7.13857	4.80823	7.57691e-05	0.000862599	0.854392
55151	TMEM38B	9q31.2	-1.11583	3.86268	-4.80785	7.58407e-05	0.000862599	1.5193
8932	MBD2	18q21.2	0.528089	6.91888	4.80748	7.59108e-05	0.000862599	0.8402
79084	WDR77	1p13.2	-0.536483	5.65813	-4.80366	7.6634e-05	0.000869839	1.00262
81671	VMP1	17q23.1	0.447496	9.50774	4.79398	7.84994e-05	0.000890012	0.623083
93663	ARHGAP18	6q22.33	0.837436	4.2526	4.79199	7.88865e-05	0.000893398	1.28272
4929	NR4A2	2q24.1	0.663053	5.29529	4.78909	7.94575e-05	0.000898857	1.07327
29128	UHRF1	19p13.3	-2.66871	3.43914	-4.78234	8.08011e-05	0.000913034	1.60554
6189	RPS3A	4q31.3	-0.486571	10.6747	-4.78147	8.09756e-05	0.000913242	0.544037
51109	RDH11	14q24.1	-0.716587	5.67166	-4.78135	8.10003e-05	0.000913242	0.991717
84319	CMSS1	3q12.1	-1.37542	3.96327	-4.77891	8.14929e-05	0.000917772	1.46399
9980	DOPEY2	21q22.12	0.434832	7.42481	4.7769	8.19009e-05	0.000921339	0.726827
7407	VARS	6p21.33	-0.684949	5.6079	-4.77289	8.2721e-05	0.00092953	1.01352
5547	PRCP	11q14.1	-0.7007	6.36928	-4.77235	8.28316e-05	0.000929739	0.867485
10026	PIGK	1p31.1	-1.03975	4.14504	-4.7711	8.30898e-05	0.000931569	1.38311
390	RND3	2q23.3	0.939026	4.93727	4.77066	8.31791e-05	0.000931569	1.11377
5723	PSPH	7p11.2	-1.0129	4.39372	-4.76941	8.34375e-05	0.000933428	1.37433
64083	GOLPH3	5p13.3	0.488017	7.40911	4.76182	8.50269e-05	0.000950157	0.687634
94121	SYTL4	Xq22.1	-1.8266	2.29912	-4.75958	8.55017e-05	0.000954407	1.5427
2131	EXT1	8q24.11	0.923364	4.70163	4.7585	8.57308e-05	0.000955908	1.18422
10166	SLC25A15	13q14.11	-0.753128	4.80696	-4.75742	8.59621e-05	0.000957431	1.11371
54583	EGLN1	1q42.2	0.717203	4.53537	4.75321	8.68655e-05	0.000966427	1.1591
23268	DNMBP	10q24.2	-0.896871	4.79236	-4.74882	8.78174e-05	0.000975198	1.074
7464	CORO2A	9q22.33	0.983462	4.44641	4.74869	8.7847e-05	0.000975198	1.24483
9123	SLC16A3	17q25.3	-1.44983	2.81815	-4.74694	8.82291e-05	0.000978365	1.51633
8543	LMO4	1p22.3	0.809505	4.76553	4.73953	8.98685e-05	0.000995312	1.13469
5888	RAD51	15q15.1	-2.54836	2.33248	-4.73915	8.99545e-05	0.000995312	1.41833
5983	RFC3	13q13.2	-1.03944	4.45148	-4.73619	9.06194e-05	0.00100157	1.23898
9133	CCNB2	15q22.2	-2.58455	3.39683	-4.72983	9.2062e-05	0.0010164	1.47776
6230	RPS25	11q23.3	-0.537773	9.91046	-4.7258	9.29887e-05	0.00102552	0.442831
84733	CBX2	17q25.3	-0.515328	6.51068	-4.72317	9.35985e-05	0.00103111	0.73697
65059	RAPH1	2q33.2	0.555217	6.48707	4.72262	9.37269e-05	0.0010314	0.753157
80303	EFHD1	2q37.1	0.449108	6.87447	4.72057	9.42072e-05	0.00103556	0.686035
8560	DEGS1	1q42.11	-0.785469	4.59205	-4.71326	9.5933e-05	0.00105339	1.05498
11332	ACOT7	1p36.31	-0.932465	4.68021	-4.71039	9.66209e-05	0.00105979	1.05944
317749	DHRS4L2	14q11.2	-1.04948	4.02309	-4.70942	9.68536e-05	0.00106119	1.21327
285368	PRRT3	3p25.3	0.577261	6.41053	4.70845	9.70878e-05	0.0010626	0.698941
5562	PRKAA1	5p13.1	0.533438	6.18734	4.70615	9.76453e-05	0.00106755	0.733049
27250	PDCD4	10q25.2	-0.580289	6.78435	-4.70561	9.77754e-05	0.00106781	0.6055
27154	BRPF3	6p21.31	0.557808	6.24524	4.70315	9.83763e-05	0.00107227	0.715409
26094	DCAF4	14q24.2	0.630388	5.61539	4.70307	9.83962e-05	0.00107227	0.816901
79838	TMC5	16p12.3	2.42975	2.44384	4.7026	9.85105e-05	0.00107236	1.41967
10743	RAI1	17p11.2	0.575529	6.23173	4.69955	9.92599e-05	0.0010793	0.710986
91875	TTC5	14q11.2	-1.1252	3.80244	-4.69914	9.93615e-05	0.0010793	1.22627
375775	PNPLA7	9q34.3	0.937832	4.1977	4.69864	9.9486e-05	0.00107949	1.15231
29887	SNX10	7p15.2	-0.725463	5.12906	-4.69693	9.99083e-05	0.00108196	0.884331
115703	ARHGAP33	19q13.12	-1.65428	3.41669	-4.69659	9.99939e-05	0.00108196	1.3744
399687	MYO18A	17q11.2	0.734602	5.59992	4.69643	0.000100034	0.00108196	0.817043
5860	QDPR	4p15.32	1.17988	3.77038	4.6952	0.000100339	0.00108409	1.27542
57082	KNL1	15q15.1	-3.46784	2.04275	-4.69359	0.000100741	0.00108727	1.18484
6709	SPTAN1	9q34.11	0.445631	7.7405	4.69187	0.000101175	0.00109079	0.481766
85465	SELENOI	2p23.3	-0.505263	6.32026	-4.68949	0.000101775	0.00109609	0.652657
254827	NAALADL2	3q26.31	-1.12774	3.25893	-4.68484	0.000102958	0.00110765	1.26585
1719	DHFR	5q14.1	-0.927765	5.44795	-4.67905	0.000104452	0.00112252	0.86256
8565	YARS	1p35.1	-0.488246	7.4341	-4.67856	0.000104579	0.00112269	0.533445
10544	PROCR	20q11.22	-1.55167	2.18404	-4.67647	0.000105123	0.00112639	1.34114
64151	NCAPG	4p15.31	-3.70647	2.11644	-4.67639	0.000105146	0.00112639	1.13964
9497	SLC4A7	3p24.1	-0.597621	5.27137	-4.67299	0.000106037	0.00113473	0.795869
80700	UBXN6	19p13.3	0.519205	6.4317	4.66892	0.000107116	0.0011448	0.599387
150275	CCDC117	22q12.1	-0.556229	6.67324	-4.66842	0.000107251	0.0011448	0.556999
1431	CS	12q13.3	-0.399568	7.79556	-4.66817	0.000107318	0.0011448	0.424911
55839	CENPN	16q23.2	-1.09489	5.12048	-4.6672	0.000107577	0.00114636	0.989648
9238	TBRG4	7p13	-0.534467	5.74691	-4.66654	0.000107753	0.00114702	0.706545
84916	UTP4	16q22.1	-0.536405	5.95218	-4.6658	0.000107953	0.00114737	0.662875
427	ASAH1	8p22	0.541297	7.87089	4.66557	0.000108013	0.00114737	0.39312
83879	CDCA7	2q31.1	-3.05623	2.82724	-4.66172	0.000109053	0.0011572	1.29682
100506365	OTUD6B-AS1	8q21.3	-0.849304	5.2813	-4.66093	0.000109266	0.00115825	0.762122
5934	RBL2	16q12.2	0.469965	7.9835	4.65429	0.000111086	0.0011763	0.367231
25939	SAMHD1	20q11.23	-1.1103	3.3722	-4.65178	0.000111783	0.00118223	1.20742
55186	SLC25A36	3q23	0.509963	6.71136	4.65143	0.00011188	0.00118223	0.540548
340267	COL28A1	7p21.3	2.2611	1.87439	4.64701	0.000113117	0.00119406	1.27763
51646	YPEL5	2p23.1	0.464895	7.05046	4.64369	0.000114054	0.00120269	0.416106
5213	PFKM	12q13.11	-0.5109	6.6889	-4.64096	0.000114832	0.00120963	0.489838
9700	ESPL1	12q13.13	-3.96971	2.65806	-4.63982	0.000115158	0.00121077	1.09624
51491	NOP16	5q35.2	-0.693441	4.71364	-4.63974	0.000115181	0.00121077	0.840435
10106	CTDSP2	12q14.1	0.406894	8.64536	4.63916	0.000115348	0.00121127	0.298723
54914	FOCAD	9p21.3	-0.741371	4.79111	-4.6385	0.000115537	0.001212	0.812498
112	ADCY6	12q13.12	0.482861	7.34414	4.63775	0.000115752	0.001213	0.397269
890	CCNA2	4q27	-2.72953	3.59897	-4.63607	0.000116237	0.00121681	1.26135
10059	DNM1L	12p11.21	0.45439	6.59035	4.63401	0.000116835	0.00122181	0.463467
4616	GADD45B	19p13.3	0.625393	6.20924	4.63318	0.000117077	0.00122308	0.536938
192111	PGAM5	12q24.33	-0.66341	5.59171	-4.62983	0.000118058	0.00123205	0.616328
1062	CENPE	4q24	-2.20684	3.79492	-4.6231	0.000120052	0.00125109	1.24092
4501	MT1X	16q13	1.15307	3.88793	4.62283	0.00012013	0.00125109	1.10556
283987	HID1	17q25.1	0.431323	8.15828	4.6223	0.000120291	0.00125148	0.277067
25949	SYF2	1p36.11	0.608037	6.24195	4.62108	0.000120656	0.00125397	0.51503
23030	KDM4B	19p13.3	-0.66691	5.4397	-4.61966	0.000121083	0.00125712	0.61101
83891	SNX25	4q35.1	1.04256	4.08314	4.61521	0.000122432	0.00126972	0.978513
53832	IL20RA	6q23.3	-0.894613	4.0836	-4.61483	0.000122548	0.00126972	0.953525
51293	CD320	19p13.2	-1.00882	3.99485	-4.61201	0.000123411	0.00127735	1.00818
5829	PXN	12q24.23	0.384319	8.31453	4.60913	0.000124297	0.00128519	0.230943
10403	NDC80	18p11.32	-3.93762	3.47511	-4.60873	0.000124422	0.00128519	1.09035
51605	TRMT6	20p12.3	-1.19913	3.33394	-4.59987	0.000127196	0.00131155	1.07436
51097	SCCPDH	1q44	0.562077	5.43769	4.59975	0.000127234	0.00131155	0.524319
2517	FUCA1	1p36.11	0.470828	6.48749	4.59746	0.000127962	0.0013177	0.38456
54464	XRN1	3q23	0.626799	5.76279	4.59079	0.000130103	0.00133839	0.505305
54549	SDK2	17q25.1	-0.892134	3.86946	-4.58813	0.000130968	0.00134573	0.831277
23560	GTPBP4	10p15.3	-0.506337	7.32929	-4.58777	0.000131083	0.00134573	0.254383
23012	STK38L	12p11.23	0.802888	4.68591	4.58519	0.00013193	0.00135306	0.721455
84627	ZNF469	16q24.2	0.906532	3.83659	4.58148	0.000133153	0.00136421	0.874276
65083	NOL6	9p13.3	-0.762962	4.85288	-4.56838	0.000137568	0.00140802	0.607422
271	AMPD2	1p13.3	-0.609695	5.36427	-4.56546	0.000138571	0.00141685	0.50588
57510	XPO5	6p21.1	-0.450192	6.91107	-4.56441	0.000138934	0.00141912	0.263611
283991	UBALD2	17q25.1	0.843907	4.42034	4.55947	0.000140651	0.00143475	0.778647
5217	PFN2	3q25.1	0.380871	8.19949	4.55919	0.000140748	0.00143475	0.110913
7249	TSC2	16p13.3	0.466938	7.48449	4.558	0.000141168	0.00143758	0.183117
3977	LIFR	5p13.1	0.66026	5.26583	4.5532	0.000142865	0.0014534	0.506217
200734	SPRED2	2p14	0.531131	6.58589	4.54787	0.000144774	0.00147134	0.28812
54800	KLHL24	3q27.1	0.700532	5.57914	4.54582	0.000145515	0.00147686	0.44126
1798	DPAGT1	11q23.3	-0.491435	6.4823	-4.54555	0.00014561	0.00147686	0.28546
54732	TMED9	5q35.3	-0.397669	8.04504	-4.54487	0.000145859	0.0014779	0.0917077
4054	LTBP3	11q13.1	0.614414	6.81127	4.54355	0.000146338	0.00148127	0.221097
57834	CYP4F11	19p13.12	-1.42614	2.90339	-4.54181	0.000146972	0.0014862	0.992236
1163	CKS1B	1q21.3	-1.43586	4.37578	-4.53822	0.000148294	0.00149806	0.893349
376267	RAB15	14q23.3	0.485574	6.67221	4.53715	0.000148688	0.00150054	0.250348
54908	SPDL1	5q35.1	-1.57124	3.62311	-4.53506	0.000149466	0.00150689	0.994368
23550	PSD4	2q14.1	0.542291	6.39754	4.53342	0.000150077	0.00151154	0.261595
55706	NDC1	1p32.3	-0.730179	5.1542	-4.52857	0.000151898	0.00152836	0.530884
3303	HSPA1A	6p21.33	0.663026	7.23145	4.52767	0.00015224	0.00153028	0.0998777
8629	JRK	8q24.3	0.617657	5.32507	4.51528	0.000157011	0.00157666	0.456649
3158	HMGCS2	1p12	2.56343	2.18977	4.51445	0.000157333	0.00157833	0.981981
4249	MGAT5	2q21.2-q21.3	-0.507481	6.4106	-4.51232	0.000158173	0.00158456	0.202547
79735	TBC1D17	19q13.33	0.577369	5.33403	4.51207	0.000158268	0.00158456	0.399441
675	BRCA2	13q13.1	-2.11685	2.2589	-4.5046	0.000161241	0.00161273	0.93829
6208	RPS14	5q33.1	-0.392597	9.45481	-4.50222	0.000162199	0.0016207	-0.0911007
57122	NUP107	12q15	-0.561371	5.87624	-4.50167	0.000162421	0.00162132	0.30196
89853	MVB12B	9q33.3	0.902338	4.19858	4.4984	0.000163751	0.00163298	0.647395
2589	GALNT1	18q12.2	0.409771	7.24072	4.49434	0.000165414	0.00164794	0.0374551
97	ACYP1	14q24.3	-1.37694	2.98486	-4.48963	0.000167366	0.00166574	0.897343
11335	CBX3	7p15.2	-0.411461	8.39902	-4.48739	0.000168303	0.00167343	-0.0787482
58478	ENOPH1	4q21.22	-0.544625	6.22028	-4.48633	0.000168746	0.00167618	0.166977
9410	SNRNP40	1p35.2	-0.717994	5.10095	-4.47668	0.000172852	0.00171527	0.380556
58477	SRPRB	3q22.1	-0.486543	6.08617	-4.47583	0.000173217	0.00171593	0.173564
79885	HDAC11	3p25.1	-0.504011	6.01943	-4.47573	0.000173258	0.00171593	0.156063
1857	DVL3	3q27.1	0.42277	7.49989	4.47534	0.00017343	0.00171596	-0.0298922
200058	FLJ23867	1q25.2	0.685518	7.61488	4.47403	0.000173995	0.00171986	-0.0468911
123	PLIN2	9p22.1	1.5441	3.536	4.47306	0.000174416	0.00172234	0.805341
79365	BHLHE41	12p12.1	-0.757484	5.43144	-4.47164	0.000175035	0.00172676	0.299101
196383	RILPL2	12q24.31	0.76136	4.54387	4.46836	0.000176468	0.0017392	0.478026
9156	EXO1	1q43	-2.80815	1.65049	-4.46648	0.000177298	0.00174568	0.714119
65991	FUNDC2	Xq28	-0.443408	6.86237	-4.46579	0.000177602	0.00174696	0.0153201
81930	KIF18A	11p14.1	-2.27756	2.58636	-4.46473	0.000178071	0.00174988	0.84702
9134	CCNE2	8q22.1	-1.39813	3.34072	-4.4588	0.000180719	0.00177418	0.757104
23165	NUP205	7q33	-0.552011	6.69401	-4.45459	0.000182624	0.00179113	0.051138
9791	PTDSS1	8q22.1	-0.441633	6.7674	-4.4535	0.000183124	0.0017943	0.00329483
10598	AHSA1	14q24.3	-0.46034	6.5311	-4.45302	0.00018334	0.00179467	0.0145417
122416	ANKRD9	14q32.31	0.926723	3.97147	4.45172	0.000183936	0.00179877	0.574727
57419	SLC24A3	20p11.23	0.473693	6.80959	4.4493	0.000185045	0.00180786	0.0141556
11113	CIT	12q24.23	-3.31079	2.88944	-4.4486	0.000185371	0.00180929	0.701244
3914	LAMB3	1q32.2	-1.34001	2.8454	-4.4481	0.000185604	0.00180981	0.789566
22837	COBLL1	2q24.3	0.706451	5.88034	4.44634	0.000186417	0.00181599	0.158437
4325	MMP16	8q21.3	0.560815	5.75102	4.44018	0.000189298	0.00184228	0.116978
10553	HTATIP2	11p15.1	-0.574572	5.58721	-4.43935	0.000189691	0.00184433	0.14533
1717	DHCR7	11q13.4	-0.580755	7.0428	-4.43772	0.00019046	0.00185002	-0.0735875
2597	GAPDH	12p13.31	-0.34873	11.3771	-4.43488	0.000191814	0.00186138	-0.342271
25953	PNKD	2q35	0.4523	6.48398	4.43252	0.000192946	0.00187058	0.00843456
23213	SULF1	8q13.2-q13.3	-2.14007	2.07504	-4.43035	0.000193992	0.00187891	0.773086
6133	RPL9	4p14	-0.447313	9.5841	-4.42804	0.000195107	0.0018879	-0.284305
10608	MXD4	4p16.3	0.537268	6.65735	4.42407	0.000197049	0.00190487	-0.0551636
11060	WWP2	16q22.1	0.389925	7.30721	4.42314	0.000197503	0.00190743	-0.136425
8662	EIF3B	7p22.3	-0.3715	8.65388	-4.42045	0.000198831	0.00191842	-0.254565
54517	PUS7	7q22.3	-0.76319	4.68653	-4.4173	0.0002004	0.00193094	0.315411
10785	WDR4	21q22.3	-0.938736	4.10151	-4.41707	0.000200512	0.00193094	0.471982
5889	RAD51C	17q22	-0.494184	7.30322	-4.41669	0.000200702	0.00193094	-0.138173
8659	ALDH4A1	1p36.13	0.641207	7.10212	4.41563	0.000201231	0.0019342	-0.132862
114904	C1QTNF6	22q12.3	-0.764917	4.37474	-4.41481	0.000201645	0.00193633	0.325361
60674	GAS5	1q25.1	-0.522867	8.01889	-4.41166	0.000203233	0.00194973	-0.232336
4122	MAN2A2	15q26.1	0.476113	6.56248	4.4089	0.000204635	0.00196108	-0.0701953
995	CDC25C	5q31.2	-3.30628	1.58644	-4.40856	0.000204805	0.00196108	0.527148
116441	TM4SF18	3q25.1	1.08163	3.31016	4.40775	0.000205221	0.0019632	0.468757
158158	RASEF	9q21.32	0.547752	6.52986	4.39922	0.000209627	0.00200345	-0.0998078
23352	UBR4	1p36.13	0.506677	7.74075	4.39736	0.0002106	0.00200907	-0.239938
25937	WWTR1	3q25.1	0.534446	5.43794	4.39734	0.000210612	0.00200907	0.113771
445	ASS1	9q34.11	-0.52045	8.53358	-4.39151	0.000213693	0.00203653	-0.268343
4170	MCL1	1q21.2	0.434253	9.10546	4.38477	0.000217306	0.00206901	-0.3723
10745	PHTF1	1p13.2	-0.454652	6.14765	-4.38375	0.00021786	0.00207233	-0.0934689
9735	KNTC1	12q24.31	-1.05125	4.28828	-4.38318	0.000218172	0.00207335	0.466096
754	PTTG1IP	21q22.3	0.36354	8.36918	4.38182	0.000218912	0.00207843	-0.334816
84168	ANTXR1	2p13.3	0.524638	5.75492	4.37758	0.000221236	0.00209852	0.00124064
55224	ETNK2	1q32.1	-0.859292	5.00765	-4.3765	0.000221828	0.00210217	0.176874
23263	MCF2L	13q34	0.56138	6.08009	4.37604	0.000222086	0.00210263	-0.0427358
8905	AP1S2	Xp22.2	-1.17667	3.99576	-4.37374	0.000223363	0.00211274	0.449681
1364	CLDN4	7q11.23	0.396961	8.04708	4.37271	0.000223935	0.00211608	-0.342161
9479	MAPK8IP1	11p11.2	1.2816	2.79017	4.37235	0.000224134	0.00211608	0.585567
5166	PDK4	7q21.3	1.00289	4.13888	4.37072	0.000225046	0.0021227	0.42768
51538	ZCCHC17	1p35.2	-0.572001	5.63218	-4.36983	0.000225544	0.00212542	-0.0389617
51004	COQ6	14q24.3	0.702273	4.72819	4.3651	0.000228219	0.00214806	0.197854
387914	SHISA2	13q12.13	0.738183	4.73428	4.36483	0.000228373	0.00214806	0.168393
841	CASP8	2q33.1	-0.79296	4.27423	-4.3627	0.000229583	0.00215744	0.244332
54821	ERCC6L	Xq13.1	-2.99903	2.03261	-4.3623	0.000229813	0.00215759	0.544864
54477	PLEKHA5	12p12.3	0.579706	6.06151	4.3611	0.000230505	0.00216208	-0.0734445
5825	ABCD3	1p21.3	-0.539127	5.87452	-4.35477	0.000234165	0.00219437	-0.110341
3693	ITGB5	3q21.2	-0.42746	7.25722	-4.35412	0.000234541	0.00219586	-0.342705
4234	METTL1	12q14.1	-0.837368	4.09298	-4.35225	0.000235641	0.00220321	0.27992
57828	CATSPERG	19q13.2	0.726211	4.45354	4.35204	0.000235762	0.00220321	0.0826979
4646	MYO6	6q14.1	0.384467	8.37232	4.34999	0.000236966	0.00221241	-0.419414
29760	BLNK	10q24.1	1.08948	3.75254	4.34543	0.000239672	0.00223504	0.36792
6137	RPL13	16q24.3	-0.412893	10.8798	-4.34517	0.000239832	0.00223504	-0.54534
9875	URB1	21q22.11	-0.554187	5.40433	-4.34427	0.00024037	0.00223799	-0.0514567
54014	BRWD1	21q22.2	0.447649	8.11114	4.34171	0.000241906	0.00225022	-0.417101
8763	CD164	6q21	0.533027	8.49607	4.33762	0.000244382	0.00227116	-0.44613
26224	FBXL3	13q22.3	0.791137	4.78402	4.33443	0.000246332	0.00228717	0.0826486
63951	DMRTA1	9p21.3	1.5622	2.76281	4.33318	0.000247099	0.00229134	0.555818
22821	RASA3	13q34	-0.680924	4.4298	-4.33296	0.000247234	0.00229134	0.127996
79443	FYCO1	3p21.31	0.493081	6.00348	4.33163	0.000248056	0.00229685	-0.185978
6233	RPS27A	2p16.1	-0.481237	10.4703	-4.33087	0.000248521	0.00229764	-0.566454
6303	SAT1	Xp22.11	0.670925	6.01255	4.33075	0.000248597	0.00229764	-0.177417
1001	CDH3	16q22.1	0.371509	8.16937	4.32951	0.000249366	0.00230265	-0.459877
339487	ZBTB8OS	1p35.1	-0.686965	4.70025	-4.32755	0.000250587	0.00231181	0.0765701
10979	FERMT2	14q22.1	0.742651	4.7142	4.32374	0.000252976	0.00233129	0.128712
4664	NAB1	2q32.2	-1.03185	3.89819	-4.32345	0.00025316	0.00233129	0.296437
55790	CSGALNACT1	8p21.3	1.51735	2.31844	4.32065	0.00025493	0.00234545	0.497612
6645	SNTB2	16q22.1	0.610825	5.75914	4.31858	0.000256245	0.0023554	-0.160761
2335	FN1	2q35	-0.49093	7.09289	-4.317	0.000257255	0.0023615	-0.353311
55326	AGPAT5	8p23.1	-0.748625	4.4594	-4.31681	0.000257376	0.0023615	0.134743
57140	RNPEPL1	2q37.3	0.599964	5.58804	4.31606	0.000257856	0.00236353	-0.1322
23082	PPRC1	10q24.32	-0.751444	5.26583	-4.31549	0.000258225	0.00236353	-0.0734762
85441	HELZ2	20q13.33	0.676683	5.84948	4.31537	0.000258299	0.00236353	-0.18837
26751	SH3YL1	2p25.3	0.649441	6.71422	4.31415	0.000259089	0.00236723	-0.357855
25962	VIRMA	8q22.1	0.414524	7.43299	4.31402	0.000259172	0.00236723	-0.415001
10575	CCT4	2p15	-0.32952	8.40754	-4.31134	0.000260904	0.00238089	-0.510764
56005	MYDGF	19p13.3	-0.56387	6.47016	-4.31027	0.000261602	0.00238511	-0.282885
4691	NCL	2q37.1	-0.384341	9.38952	-4.30651	0.00026406	0.00240535	-0.573807
210	ALAD	9q32	0.484213	6.24558	4.29887	0.000269131	0.00244669	-0.296522
22905	EPN2	17p11.2	-0.693677	4.55802	-4.29859	0.000269318	0.00244669	0.0704963
51053	GMNN	6p22.3	-1.49701	3.39189	-4.29858	0.000269325	0.00244669	0.41985
3181	HNRNPA2B1	7p15.2	-0.386863	10.1846	-4.29706	0.000270348	0.00245378	-0.631026
55835	CENPJ	13q12.12-q12.13	-1.37107	2.93259	-4.29548	0.000271416	0.00246126	0.455999
19	ABCA1	9q31.1	2.40084	2.36538	4.29248	0.000273445	0.00247393	0.486228
57647	DHX37	12q24.31	-0.705543	4.48525	-4.29237	0.000273525	0.00247393	0.0527216
7068	THRB	3p24.2	-0.652232	5.2677	-4.29233	0.000273547	0.00247393	-0.0542999
29841	GRHL1	2p25.1	-0.851494	5.16581	-4.28978	0.000275294	0.00248533	-0.0706163
81563	C1orf21	1q25.3	0.482672	7.3008	4.28921	0.000275685	0.00248533	-0.473622
51129	ANGPTL4	19p13.2	0.921602	4.83829	4.28911	0.000275755	0.00248533	0.0655413
9871	SEC24D	4q26	-0.411145	7.68787	-4.28874	0.000276008	0.00248533	-0.509172
23054	NCOA6	20q11.22	0.432713	6.51617	4.28863	0.000276081	0.00248533	-0.350868
51020	HDDC2	6q22.31	-0.526335	5.76842	-4.28833	0.000276285	0.00248533	-0.247722
4008	LMO7	13q22.2	1.29049	4.17754	4.28709	0.000277139	0.0024907	0.07391
55227	LRRC1	6p12.1	0.417153	6.63945	4.28675	0.000277374	0.0024907	-0.385424
23357	ANGEL1	14q24.3	-0.572595	5.41082	-4.28612	0.000277812	0.00249241	-0.184289
112611	RWDD2A	6q14.1	0.71104	4.73563	4.28528	0.000278391	0.00249539	-0.0381545
6224	RPS20	8q12.1	-0.462978	8.97845	-4.28432	0.000279061	0.00249918	-0.609159
3832	KIF11	10q23.33	-1.68763	4.66606	-4.28224	0.000280509	0.00250898	0.283698
54836	BSPRY	9q32	-0.549555	5.55919	-4.28203	0.000280652	0.00250898	-0.189812
1362	CPD	17q11.2	0.444929	6.93619	4.28078	0.000281532	0.00251462	-0.425118
1374	CPT1A	11q13.3	0.355989	8.69025	4.27509	0.000285543	0.0025482	-0.611477
1605	DAG1	3p21.31	0.379476	7.78141	4.27332	0.000286804	0.00255718	-0.568521
202018	TAPT1	4p15.32	0.722944	4.8296	4.27036	0.000288929	0.00257387	-0.0430957
55819	RNF130	5q35.3	0.471717	7.32663	4.26781	0.000290768	0.00258797	-0.511805
573	BAG1	9p13.3	-0.448113	6.45841	-4.26525	0.000292625	0.0026022	-0.456864
65018	PINK1	1p36.12	0.811332	4.31691	4.26442	0.00029323	0.00260304	0.0109328
57198	ATP8B2	1q21.3	0.722005	6.49693	4.26417	0.000293415	0.00260304	-0.44108
6240	RRM1	11p15.4	-0.661635	6.227	-4.26406	0.000293492	0.00260304	-0.325117
11282	MGAT4B	5q35.3	0.409687	7.71645	4.26265	0.000294525	0.00260991	-0.573277
388403	YPEL2	17q22	0.61912	5.9831	4.26118	0.000295602	0.00261716	-0.363165
94134	ARHGAP12	10p11.22	0.482131	6.61727	4.26061	0.000296025	0.0026186	-0.457096
26354	GNL3	3p21.1	-0.429261	6.66752	-4.2571	0.000298621	0.00263925	-0.456365
1209	CLPTM1	19q13.32	0.398637	7.20718	4.25484	0.000300305	0.00265182	-0.546741
5332	PLCB4	20p12.3-p12.2	0.644585	5.54757	4.25379	0.000301094	0.00265646	-0.248638
64283	ARHGEF28	5q13.2	-1.16122	3.1247	-4.25294	0.000301731	0.00265759	0.263283
79586	CHPF	2q35	-0.540434	7.27215	-4.2525	0.000302061	0.00265759	-0.579386
54852	PAQR5	15q23	1.64522	2.72575	4.2521	0.000302359	0.00265759	0.37492
51155	JPT1	17q25.1	-0.453379	6.90709	-4.25208	0.000302376	0.00265759	-0.532678
51512	GTSE1	22q13.31	-3.08125	2.96106	-4.25161	0.000302731	0.00265759	0.354642
3728	JUP	17q21.2	0.427407	8.89272	4.25152	0.0003028	0.00265759	-0.68747
401397	SMIM30	7q31.1	-0.970827	3.4929	-4.25021	0.000303786	0.00266223	0.161486
57597	BAHCC1	17q25.3	0.735708	4.6345	4.25007	0.000303895	0.00266223	0.0114779
7298	TYMS	18p11.32	-0.990107	4.57883	-4.24977	0.00030412	0.00266223	-0.0508036
9401	RECQL4	8q24.3	-1.22857	4.45317	-4.2487	0.000304931	0.00266703	0.123843
653784	MZT2A	2q21.1	-0.759799	4.61366	-4.24784	0.000305586	0.00267044	-0.00928154
353	APRT	16q24.3	-0.473144	7.73742	-4.24673	0.000306431	0.00267551	-0.613898
4358	MPV17	2p23.3	-0.488129	6.06794	-4.24326	0.000309089	0.00269512	-0.41101
252969	NEIL2	8p23.1	-0.88301	3.96913	-4.2431	0.000309211	0.00269512	0.0401083
394	ARHGAP5	14q12	0.549766	6.02276	4.2404	0.000311293	0.00271093	-0.401712
[truncated: 8,942 more rows]

## Sheet: Table S4. Gene Set
Table S4: Differential genes induced by combination therapy (NVP-CGM097 + fulvestrant) versus vehicle (0.01% DMSO).
[truncated: 287 more rows]

[truncated: 16 more sheets: Table S5. KEGG Analysis, Table S6. CombinationScore, Table S7. NVP-CGM097, Table S8. Fulvestrant, Table S9. Combination, Table S10. GSEA.NVP-CGM097, Table S11. GSEA.Fulvestrant, Table S12. GSEA.Combination, Table S13. GSEA.NVP-CGM097, Table S14. GSEA.Fulvestrant, Table S15. GSEA.Combination, Table S16. CombinationScore, Table S17. NVP-CGM097, Table S18. Palbociclib, Table S19. Combination, Table S20. CombinationScore]
